# Supplementary material
Source: publisher figshare collection journal article supplement (https://gsajournals.figshare.com/articles/dataset/_/12791921)
Supplement: Supplementary file 1 [file 1]

**A**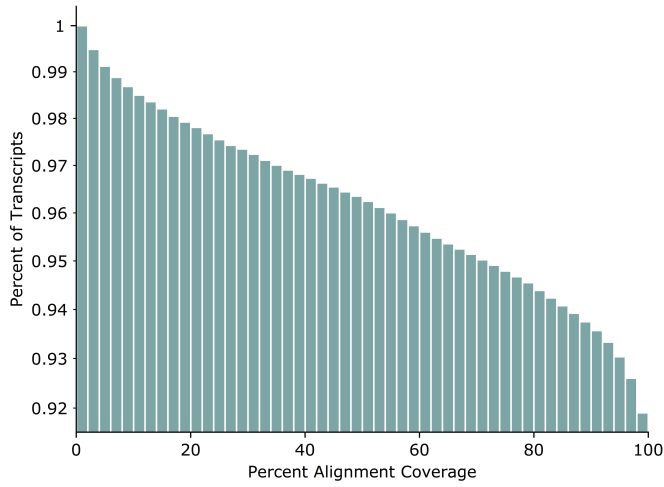**B**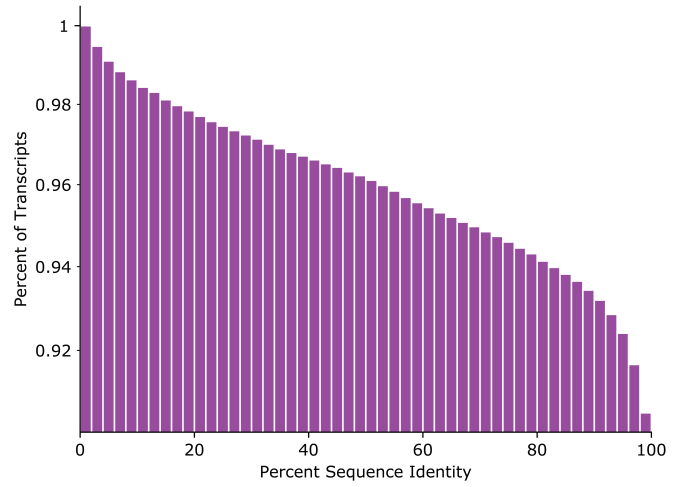

**Figure S4. Alignment coverage and sequence identity cumulative distribution.** (A) Cumulative distribution showing how much of the IWGSC CS v1.0 transcripts map onto *Triticum\_aestivum\_4.0*. The y-axis shows the fraction of transcripts with percent coverage greater than or equal to coverage on the x-axis. (B) Cumulative distribution showing the sequence identity of IWGSC CS v1.0 transcripts mapped onto *Triticum\_aestivum\_4.0*. The y-axis shows the fraction of transcripts with sequence identity greater than or equal to sequence on the x-axis.
