# Supplementary material
Source: publisher figshare collection journal article supplement (https://gsajournals.figshare.com/articles/dataset/_/12791921)
Supplement: Supplementary file 1 [file 1]

## Sheet: Table S1
Table S1. Inferred centromere positions for the Triticum_aestivum_4.0 (T4) assembly.
Chr	Start (bp)	End (bp)
chr1A	224500000	231400000
chr1B	251000000	259100000
chr1D	184900000	193400000
chr2A	364700000	367700000
chr2B	364100000	373600000
chr2D	286000000	295500000
chr3A	342100000	348900000
chr3B	369000000	376000000
chr3D	250700000	258200000
chr4A	276500000	280800000
chr4B	336500000	339300000
chr4D	195400000	202200000
chr5A	267600000	272700000
chr5B	214900000	219200000
chr5D	206700000	212800000
chr6A	308600000	318600000
chr6B	347800000	353800000
chr6D	232400000	239300000
chr7A	387400000	391400000
chr7B	329000000	331400000
chr7D	365100000	372900000

## Sheet: Table S2
Table S2. Genes annotated on chrUn in IWGSC_v1.1 annotation mapped onto pseudomolecules in Triticum 4.0 (T4) and IWGSC v1.0 (IW) assemblies. mRNA alignment coverage and sequence identity are shown in the last two columns of each table.
T4								IW
T4 Gene ID	IW Gene ID	Chr	Start	End	Alignment Coverage	Sequence Identity		IW Gene ID	Chr	Start	End	Alignment Coverage	Sequence Identity
T4000001	TraesCSU02G266700	chr1A	28819	29115	1	0.996633		TraesCSU02G106500	chr1A	554513489	554513629	1	1
T4000016	TraesCSU02G265800	chr1A	471123	471419	1	0.996633		TraesCSU02G204200	chr1A	579552645	579553439	1	1
T4000018	TraesCSU02G265400	chr1A	525742	526038	1	0.996633		TraesCSU02G002500	chr1B	13635452	13635694	1	1
T4000035	TraesCSU02G184000	chr1A	1948769	1949216	1	1		TraesCSU02G267500	chr1B	19357022	19357683	1	1
T4000057	TraesCSU02G000200	chr1A	3802582	3803830	1	1		TraesCSU02G264100	chr1B	90542754	90543059	1	1
T4000058	TraesCSU02G185400	chr1A	3822344	3826168	1	1		TraesCSU02G148900	chr1B	302242323	302242871	1	1
T4000059	TraesCSU02G254400	chr1A	3873168	3873743	1	1		TraesCSU02G267800	chr1B	544594695	544594991	1	1
T4000061	TraesCSU02G185200	chr1A	3916231	3920055	0.999111	0.997777		TraesCSU02G218700	chr1B	664050719	664051963	1	1
T4000107	TraesCSU02G150900	chr1A	5964537	5968267	1	1		TraesCSU02G271000	chr1B	689504170	689504367	1	1
T4000108	TraesCSU02G135500	chr1A	6151726	6156197	0.851805	0.735097		TraesCSU02G268900	chr1D	483918786	483919038	1	1
T4000116	TraesCSU02G186700	chr1A	6770051	6770308	1	1		TraesCSU02G149000	chr2A	4562607	4563235	1	1
T4000117	TraesCSU02G161500	chr1A	6871442	6871699	1	1		TraesCSU02G013600	chr2A	20558574	20562051	0.9975	0.9349
T4000215	TraesCSU02G184900	chr1A	11792791	11793828	1	1		TraesCSU02G230900	chr2A	23132036	23132323	1	1
T4000216	TraesCSU02G183000	chr1A	11813103	11814140	1	0.998952		TraesCSU02G239300	chr2A	203844937	203846013	1	1
T4000327	TraesCSU02G174500	chr1A	16084180	16084398	1	1		TraesCSU02G270200	chr2A	726910512	726910926	1	1
T4000328	TraesCSU02G000300	chr1A	16089893	16090508	1	1		TraesCSU02G236600	chr2B	34807299	34807565	1	1
T4000343	TraesCSU02G213800	chr1A	16557570	16558252	0.963121	0.855319		TraesCSU02G251800	chr2B	115608793	115609194	1	1
T4000383	TraesCSU02G155100	chr1A	18895681	18897301	1	0.997339		TraesCSU02G240300	chr2B	115611697	115613694	1	1
T4000418	TraesCSU02G150000	chr1A	23832938	23834288	1	1		TraesCSU02G270000	chr2D	33936357	33936602	1	1
T4000492	TraesCSU02G000500	chr1A	28192038	28195332	1	1		TraesCSU02G253000	chr2D	272792532	272792672	1	1
T4000493	TraesCSU02G000400	chr1A	28275011	28277763	1	1		TraesCSU02G268300	chr2D	272793243	272793404	1	1
T4000766	TraesCSU02G080400	chr1A	58907614	58907979	1	1		TraesCSU02G214300	chr2D	506328340	506328435	1	1
T4000890	TraesCSU02G108600	chr1A	72586642	72587493	1	0.982332		TraesCSU02G262800	chr2D	591996439	591996630	1	1
T4001138	TraesCSU02G210700	chr1A	112516092	112517216	1	1		TraesCSU02G259200	chr2D	628284573	628284692	1	1
T4001210	TraesCSU02G151300	chr1A	125847205	125848779	1	0.996825		TraesCSU02G245600	chr2D	630272030	630272335	1	1
T4001405	TraesCSU02G000900	chr1A	193406329	193410539	1	1		TraesCSU02G268500	chr2D	643860450	643860560	1	1
T4001506	TraesCSU02G181200	chr1A	258087450	258088431	1	1		TraesCSU02G240200	chr3A	730442759	730443344	1	1
T4002307	TraesCSU02G001000	chr1A	416690495	416692897	0.995854	0.955638		TraesCSU02G256000	chr3A	738560455	738561102	1	1
T4003237	TraesCSU02G247000	chr1A	540106399	540106925	0.998106	0.939394		TraesCSU02G179400	chr3B	5863686	5864663	1	1
T4003242	TraesCSU02G246900	chr1A	540191087	540191614	1	1		TraesCSU02G207000	chr3B	28562449	28562829	1	1
T4003278	TraesCSU02G230200	chr1A	542662293	542663270	1	1		TraesCSU02G206900	chr3B	28562953	28563540	1	1
T4003280	TraesCSU02G167400	chr1A	542705069	542709037	1	1		TraesCSU02G269100	chr3B	201514933	201515154	1	1
T4003375	TraesCSU02G003600	chr1A	550443080	550445058	0.541358	0.508381		TraesCSU02G035400	chr3B	201515210	201515341	1	1
T4003783	TraesCSU02G167700	chr1A	583542001	583543226	1	1		TraesCSU02G268200	chr3B	201528265	201528405	1	1
T4003922	TraesCSU02G236800	chr1A	590951731	590952061	1	0.966767		TraesCSU02G263800	chr3B	201571055	201571294	1	1
T4003945	TraesCSU02G184800	chr1A	591988764	591989373	1	0.996705		TraesCSU02G164500	chr3B	764449744	764450490	1	1
T4003951	TraesCSU02G214200	chr1A	592002098	592002211	1	1		TraesCSU02G235300	chr3B	830150770	830151354	1	1
T4003977	TraesCSU02G106700	chr1A	592114520	592114681	1	1		TraesCSU02G204800	chr3D	52811718	52812533	1	1
T4003978	TraesCSU02G157300	chr1A	592115272	592115412	1	0.992908		TraesCSU02G261400	chr4A	467307036	467308098	1	1
T4004148	TraesCSU02G007500	chr1A	605178614	605181654	0.997389	0.962576		TraesCSU02G253700	chr4A	592807551	592808055	1	1
T4004164	TraesCSU02G001100	chr1A	607149606	607153583	0.958539	0.958539		TraesCSU02G241400	chr4A	593100296	593100766	1	1
T4004165	TraesCSU02G001200	chr1A	607452399	607454843	1	1		TraesCSU02G192200	chr4A	642280705	642280965	1	1
T4004191	TraesCSU02G181100	chr1A	608975762	608976308	0.997619	0.992857		TraesCSU02G252500	chr4A	672593883	672595285	1	1
T4004199	TraesCSU02G001300	chr1A	609983035	609983373	1	1		TraesCSU02G246200	chr4A	672675239	672676405	1	1
T4004200	TraesCSU02G152500	chr1A	610031078	610035033	1	0.995383		TraesCSU02G230700	chr4A	714764356	714765944	1	1
T4004374	TraesCSU02G204200	chr1A	620319501	620320295	1	1		TraesCSU02G256800	chr4A	727729294	727729952	1	1
T4004378	TraesCSU02G001600	chr1A	620522967	620525321	1	1		TraesCSU02G231200	chr4B	18973937	18974302	1	1
T4004380	TraesCSU02G001400	chr1A	620642495	620644635	1	1		TraesCSU02G184300	chr4B	28302216	28302852	1	1
T4004383	TraesCSU02G051800	chr1A	621078524	621079879	1	1		TraesCSU02G254800	chr4B	514747007	514747693	1	1
T4004384	TraesCSU02G051700	chr1A	621080618	621082209	1	1		TraesCSU02G261200	chr4D	477400064	477400477	1	1
T4004504	TraesCSU02G004900	chr1A	628715201	628718629	0.831128	0.694638		TraesCSU02G270700	chr5A	229843	230403	1	1
T4004518	TraesCSU02G002100	chr1A	629695342	629697574	1	1		TraesCSU02G222000	chr5A	700388877	700389689	1	1
T4004519	TraesCSU02G179200	chr1A	629701843	629702718	1	1		TraesCSU02G073600	chr5B	37706638	37707043	1	1
T4004520	TraesCSU02G002400	chr1A	629710051	629713130	0.981907	0.981907		TraesCSU02G253600	chr5B	660879334	660880146	1	1
T4004521	TraesCSU02G002300	chr1A	629719244	629729909	1	0.994568		TraesCSU02G265200	chr5D	6233480	6233695	1	1
T4004522	TraesCSU02G002200	chr1A	629729959	629732917	1	1		TraesCSU02G229000	chr5D	493710500	493711069	1	1
T4004547	TraesCSU02G172300	chr1A	631744627	631746170	0.99354	0.931525		TraesCSU02G233000	chr5D	497103968	497104474	1	1
T4004646	TraesCSU02G226500	chr1B	2730645	2731616	1	1		TraesCSU02G267100	chr5D	503237605	503237781	1	1
T4004717	TraesCSU02G210181	chr1B	5674238	5674514	0.738667	0.72		TraesCSU02G272400	chr5D	512415627	512415737	1	1
T4004722	TraesCSU02G182638	chr1B	5730467	5730742	0.681481	0.681481		TraesCSU02G258700	chr5D	554200774	554200869	1	1
T4004723	TraesCSU02G002414	chr1B	5747611	5747823	1	1		TraesCSU02G214200	chr5D	554201049	554201162	1	1
T4004725	TraesCSU02G165233	chr1B	5811697	5811987	0.7275	0.695		TraesCSU02G264000	chr6A	610982281	610982514	1	1
T4004898	TraesCSU02G002500	chr1B	14456723	14456965	1	1		TraesCSU02G221000	chr6A	618016321	618016551	1	1
T4004900	TraesCSU02G220400	chr1B	14473529	14473771	1	1		TraesCSU02G082600	chr6A	618044359	618044589	1	1
T4004948	TraesCSU02G205600	chr1B	17089432	17090154	1	1		TraesCSU02G258500	chr6B	599852133	599852495	1	1
T4004959	TraesCSU02G002600	chr1B	17485764	17489460	0.799697	0.732121		TraesCSU02G270400	chr6D	389253983	389254237	1	1
T4004986	TraesCSU02G272500	chr1B	18537327	18537842	0.988453	0.988453		TraesCSU02G268800	chr6D	431401615	431401743	1	1
T4004988	TraesCSU02G214600	chr1B	18592642	18594244	1	1		TraesCSU02G258800	chr6D	431403397	431403510	1	1
T4005016	TraesCSU02G267500	chr1B	20183744	20184405	1	1		TraesCSU02G091700	chr7A	1820388	1822868	1	1
T4005066	TraesCSU02G002900	chr1B	25947284	25948054	1	1		TraesCSU02G272200	chr7A	60354034	60354330	1	1
T4005067	TraesCSU02G002800	chr1B	25971076	25972623	1	1		TraesCSU02G267400	chr7A	497718267	497718530	1	1
T4005068	TraesCSU02G002700	chr1B	25976621	25986719	1	1		TraesCSU02G252400	chr7A	576350865	576351865	1	1
T4005133	TraesCSU02G085600	chr1B	33014416	33017703	1	1		TraesCSU02G241300	chr7B	644462404	644462886	1	1
T4005135	TraesCSU02G085700	chr1B	33084130	33084342	1	1		TraesCSU02G215100	chr7B	732150090	732152501	1	1
T4005136	TraesCSU02G085800	chr1B	33105845	33108063	1	1		TraesCSU02G254600	chr7D	77233834	77234034	1	1
T4005171	TraesCSU02G233800	chr1B	38362374	38362709	1	1		TraesCSU02G264600	chr7D	231584675	231584947	1	1
T4005174	TraesCSU02G145100	chr1B	39099324	39100021	1	0.998342		TraesCSU02G233200	chr7D	381905172	381905417	1	1
T4005200	TraesCSU02G004700	chr1B	44239877	44241274	1	0.995868		TraesCSU02G239800	chr7D	631213645	631214019	1	1
T4005276	TraesCSU02G140700	chr1B	55457255	55460182	0.879028	0.825145
T4005347	TraesCSU02G216100	chr1B	62795309	62796231	0.964981	0.949416
T4005545	TraesCSU02G264100	chr1B	98260241	98260546	1	1
T4005687	TraesCSU02G246700	chr1B	122038999	122039760	1	1
T4005754	TraesCSU02G164600	chr1B	134082568	134083951	1	1
T4005756	TraesCSU02G015800	chr1B	134143495	134145468	1	1
T4005757	TraesCSU02G015900	chr1B	134178446	134182455	1	1
T4005758	TraesCSU02G016000	chr1B	134207242	134208330	1	1
T4005759	TraesCSU02G016100	chr1B	134212855	134214572	1	1
T4005760	TraesCSU02G016200	chr1B	134275838	134277105	1	1
T4006013	TraesCSU02G260200	chr1B	178795491	178796117	1	0.992026
T4006234	TraesCSU02G197800	chr1B	270578979	270583086	0.965827	0.951439
T4006606	TraesCSU02G191400	chr1B	361389630	361391724	0.56834	0.532078
T4006651	TraesCSU02G070200	chr1B	369631991	369632635	1	1
T4006653	TraesCSU02G070400	chr1B	369646174	369646824	1	1
T4006892	TraesCSU02G198400	chr1B	415804073	415805552	1	1
T4007133	TraesCSU02G139600	chr1B	452615868	452643941	1	1
T4007411	TraesCSU02G003500	chr1B	495518104	495519489	1	1
T4007980	TraesCSU02G000600	chr1B	576952363	576952782	1	1
T4008212	TraesCSU02G247100	chr1B	605721018	605722205	1	1
T4008853	TraesCSU02G003700	chr1B	670474364	670474662	0.996667	0.966667
T4009068	TraesCSU02G212600	chr1B	689910133	689912446	1	1
T4009089	TraesCSU02G234500	chr1B	692837483	692838379	1	1
T4009180	TraesCSU02G218700	chr1B	698665894	698667138	1	1
T4009213	TraesCSU02G159800	chr1B	701173503	701177239	1	1
T4009434	TraesCSU02G257600	chr1B	713930763	713931766	1	1
T4009535	TraesCSU02G204100	chr1B	722662483	722663073	1	0.998308
T4009536	TraesCSU02G237500	chr1B	722663998	722664588	1	1
T4009537	TraesCSU02G254500	chr1B	722734091	722734681	1	0.996616
T4009558	TraesCSU02G217100	chr1B	724646512	724647002	1	1
T4009572	TraesCSU02G271000	chr1B	727067361	727067558	1	1
T4009583	TraesCSU02G246000	chr1B	727596492	727597742	1	0.995671
T4009595	TraesCSU02G005300	chr1B	728715104	728715612	1	1
T4009596	TraesCSU02G005100	chr1B	728815474	728817290	1	1
T4009601	TraesCSU02G257591	chr1D	96398	96707	1	1
T4009602	TraesCSU02G272393	chr1D	97082	97555	1	1
T4009710	TraesCSU02G266400	chr1D	5454487	5455462	1	1
T4009711	TraesCSU02G195900	chr1D	5461063	5462351	1	1
T4009714	TraesCSU02G196000	chr1D	5488685	5489965	1	1
T4009990	TraesCSU02G005800	chr1D	16365846	16367632	1	1
T4010025	TraesCSU02G244000	chr1D	20351502	20352856	1	1
T4010046	TraesCSU02G006700	chr1D	22501264	22501581	1	1
T4010320	TraesCSU02G016700	chr1D	54431159	54432423	1	1
T4010321	TraesCSU02G016800	chr1D	54481623	54486628	1	1
T4010322	TraesCSU02G016900	chr1D	54518811	54526612	1	1
T4010446	TraesCSU02G133600	chr1D	68479394	68482630	1	1
T4010447	TraesCSU02G133500	chr1D	68487781	68488947	1	1
T4010448	TraesCSU02G133400	chr1D	68515919	68517094	1	1
T4010449	TraesCSU02G133200	chr1D	68546367	68564378	1	1
T4010451	TraesCSU02G133100	chr1D	68565212	68571041	1	1
T4010452	TraesCSU02G133000	chr1D	68602303	68609170	1	1
T4010577	TraesCSU02G090300	chr1D	86883194	86884977	1	1
T4011010	TraesCSU02G106800	chr1D	161000574	161000945	1	0.994624
T4011048	TraesCSU02G109700	chr1D	177866866	177872134	1	1
T4011049	TraesCSU02G109800	chr1D	177887394	177888002	1	1
T4011093	TraesCSU02G146300	chr1D	199271768	199274836	1	1
T4011459	TraesCSU02G200900	chr1D	268035959	268038230	0.99912	0.991645
T4011895	TraesCSU02G007200	chr1D	331570182	331574249	0.944622	0.944622
T4011905	TraesCSU02G025500	chr1D	332955204	332958528	1	1
T4012259	TraesCSU02G256900	chr1D	376003016	376003442	1	1
T4012338	TraesCSU02G173300	chr1D	383678844	383679701	1	0.990074
T4012741	TraesCSU02G262300	chr1D	433399531	433400133	1	1
T4012742	TraesCSU02G197700	chr1D	433404411	433405344	1	1
T4012744	TraesCSU02G191500	chr1D	433430051	433430956	1	1
T4012746	TraesCSU02G194800	chr1D	433455767	433456531	1	1
T4012775	TraesCSU02G142200	chr1D	436485601	436486177	1	1
T4013203	TraesCSU02G197400	chr1D	473247897	473248181	1	1
T4014061	TraesCSU02G078300	chr1D	527315205	527315621	1	1
T4014062	TraesCSU02G078200	chr1D	527358964	527359405	1	1
T4014246	TraesCSU02G204600	chr1D	539792550	539793532	1	1
T4014257	TraesCSU02G248100	chr1D	540810833	540811776	1	0.997881
T4014258	TraesCSU02G272600	chr1D	540843304	540843719	0.995215	0.995215
T4014278	TraesCSU02G240700	chr1D	541684986	541686220	0.974576	0.942797
T4014422	TraesCSU02G149000	chr2A	5511736	5512364	1	1
T4014459	TraesCSU02G222200	chr2A	7487846	7488517	1	1
T4014460	TraesCSU02G222100	chr2A	7511530	7512203	1	1
T4014462	TraesCSU02G007600	chr2A	7682356	7683003	1	1
T4014463	TraesCSU02G251100	chr2A	7687818	7688954	1	0.997719
T4014469	TraesCSU02G147400	chr2A	9057121	9058707	1	1
T4014480	TraesCSU02G008000	chr2A	9653392	9654580	1	1
T4014523	TraesCSU02G187900	chr2A	12659274	12663047	0.925926	0.925926
T4014524	TraesCSU02G008500	chr2A	12743995	12745365	1	1
T4014525	TraesCSU02G008400	chr2A	12750801	12755083	1	1
T4014558	TraesCSU02G008100	chr2A	14711519	14714708	1	1
T4014559	TraesCSU02G008200	chr2A	14717091	14719567	1	1
T4014602	TraesCSU02G252000	chr2A	16561225	16562592	0.975535	0.975535
T4014603	TraesCSU02G244600	chr2A	16565430	16566767	1	1
T4014605	TraesCSU02G008700	chr2A	16608994	16613728	1	1
T4014606	TraesCSU02G008800	chr2A	16617806	16619782	1	1
T4014607	TraesCSU02G008900	chr2A	16630136	16631970	1	1
T4014608	TraesCSU02G009000	chr2A	16635690	16637372	1	1
T4014609	TraesCSU02G009100	chr2A	16639789	16641696	1	1
T4014718	TraesCSU02G242100	chr2A	20043771	20045174	1	1
T4014727	TraesCSU02G154800	chr2A	20506231	20516987	1	1
T4014797	TraesCSU02G177000	chr2A	22330872	22334086	1	1
T4014798	TraesCSU02G009300	chr2A	22341283	22361168	1	1
T4014799	TraesCSU02G196200	chr2A	22365794	22370480	1	1
T4014853	TraesCSU02G009500	chr2A	24613337	24614810	1	1
T4014854	TraesCSU02G176400	chr2A	24769951	24771136	1	1
T4014855	TraesCSU02G163500	chr2A	24777547	24778713	1	1
T4014889	TraesCSU02G230900	chr2A	27309574	27309861	1	1
T4014890	TraesCSU02G144100	chr2A	27333111	27333398	1	1
T4014893	TraesCSU02G143100	chr2A	27616762	27617867	1	0.998045
T4014899	TraesCSU02G163600	chr2A	28017231	28018136	1	1
T4014900	TraesCSU02G161800	chr2A	28042411	28043309	0.99877	0.99631
T4014911	TraesCSU02G144000	chr2A	28942736	28943841	1	1
T4014934	TraesCSU02G220500	chr2A	30384523	30385244	1	1
T4014960	TraesCSU02G244200	chr2A	31135087	31136427	1	0.998211
T4014983	TraesCSU02G201000	chr2A	34188138	34188909	0.965517	0.87931
T4015174	TraesCSU02G009600	chr2A	44756328	44757700	1	1
T4015382	TraesCSU02G170300	chr2A	66048617	66049728	0.988444	0.974222
T4015572	TraesCSU02G192600	chr2A	82068577	82072286	0.977665	0.953299
T4015738	TraesCSU02G161600	chr2A	95961881	95962579	0.894244	0.742972
T4016140	TraesCSU02G009900	chr2A	152034295	152035556	1	1
T4016195	TraesCSU02G026200	chr2A	159281843	159283100	1	1
T4016196	TraesCSU02G026300	chr2A	159326624	159331576	1	1
T4016197	TraesCSU02G026400	chr2A	159348904	159351008	1	1
T4016198	TraesCSU02G026500	chr2A	159357630	159358908	1	1
T4016199	TraesCSU02G026600	chr2A	159382742	159383459	1	1
T4016200	TraesCSU02G026700	chr2A	159398554	159402457	1	1
T4016201	TraesCSU02G026800	chr2A	159404477	159406679	1	1
T4016202	TraesCSU02G026900	chr2A	159433015	159433542	1	1
T4016203	TraesCSU02G027000	chr2A	159433702	159436786	1	1
T4016204	TraesCSU02G027100	chr2A	159515915	159516272	1	1
T4016205	TraesCSU02G027200	chr2A	159523432	159524619	1	1
T4016514	TraesCSU02G239300	chr2A	221706591	221707667	1	1
T4016864	TraesCSU02G101300	chr2A	408291975	408305326	1	1
T4016941	TraesCSU02G158700	chr2A	430878587	430880161	1	0.998095
T4017305	TraesCSU02G160300	chr2A	539292362	539296782	1	1
T4017306	TraesCSU02G202000	chr2A	539310785	539312580	1	1
T4017326	TraesCSU02G013600	chr2A	543903853	543907132	1	1
T4017327	TraesCSU02G013500	chr2A	543972097	543973886	1	1
T4017328	TraesCSU02G013400	chr2A	544017133	544018865	1	1
T4017431	TraesCSU02G194200	chr2A	560854750	560856833	1	1
T4017545	TraesCSU02G238800	chr2A	578800851	578801123	1	0.992674
T4017548	TraesCSU02G254600	chr2A	578814014	578814214	1	1
T4017550	TraesCSU02G263800	chr2A	578819003	578819242	1	1
T4017553	TraesCSU02G251200	chr2A	578827380	578827619	1	0.995833
T4017789	TraesCSU02G000100	chr2A	616802489	616805321	1	1
T4017790	TraesCSU02G219900	chr2A	616890771	616892324	1	1
T4017791	TraesCSU02G173600	chr2A	616909036	616910223	1	1
T4017792	TraesCSU02G173700	chr2A	616914851	616917835	1	1
T4017793	TraesCSU02G143200	chr2A	616987124	616991149	1	0.998456
T4017795	TraesCSU02G143300	chr2A	617088460	617089794	1	1
T4017796	TraesCSU02G143400	chr2A	617095930	617097284	1	1
T4017822	TraesCSU02G268600	chr2A	620588190	620589005	1	1
T4018235	TraesCSU02G009800	chr2A	672807798	672809397	1	1
T4018765	TraesCSU02G216400	chr2A	733518629	733519600	1	1
T4018884	TraesCSU02G155200	chr2A	745211608	745213242	1	0.999388
T4019092	TraesCSU02G146100	chr2A	759751191	759751595	1	1
T4019333	TraesCSU02G214500	chr2A	773515712	773516936	1	1
T4019541	TraesCSU02G172900	chr2A	783647999	783650812	1	0.999106
T4019542	TraesCSU02G010400	chr2A	783657311	783658089	1	0.997433
T4019543	TraesCSU02G010300	chr2A	783664911	783667008	0.997216	0.995825
T4019544	TraesCSU02G010200	chr2A	783670956	783671741	1	1
T4019545	TraesCSU02G168800	chr2A	783675113	783676318	0.567925	0.491509
T4019546	TraesCSU02G198700	chr2A	783677176	783679990	1	0.997766
T4019871	TraesCSU02G237000	chr2A	801582726	801583619	0.796102	0.749625
T4019879	TraesCSU02G267400	chr2A	802110883	802111146	1	1
T4020003	TraesCSU02G014800	chr2A	809035386	809037093	0.816683	0.752747
T4020022	TraesCSU02G210000	chr2A	809705641	809707984	1	1
T4020027	TraesCSU02G216900	chr2A	809930503	809930865	1	1
T4020037	TraesCSU02G236400	chr2A	810569475	810570380	0.998896	0.963576
T4020071	TraesCSU02G207800	chr2A	812352991	812354118	1	1
T4020072	TraesCSU02G136700	chr2A	812390673	812391485	1	1
T4020074	TraesCSU02G136800	chr2A	812598625	812600679	1	1
T4020075	TraesCSU02G136900	chr2A	812621854	812625917	1	1
T4020076	TraesCSU02G137000	chr2A	812634060	812635169	1	1
T4020077	TraesCSU02G137100	chr2A	812733265	812736169	0.930427	0.886827
T4020078	TraesCSU02G137200	chr2A	812738003	812741419	1	1
T4020080	TraesCSU02G137400	chr2A	812755228	812759560	1	1
T4020083	TraesCSU02G137700	chr2A	812881064	812885219	1	1
T4020084	TraesCSU02G137800	chr2A	812887276	812888900	1	1
T4020146	TraesCSU02G160400	chr2A	816132926	816141035	1	1
T4020147	TraesCSU02G010600	chr2A	816287477	816288404	1	1
T4020148	TraesCSU02G010500	chr2A	816353155	816355522	1	1
T4020149	TraesCSU02G206500	chr2A	816370744	816372785	1	1
T4020150	TraesCSU02G207900	chr2A	816381418	816383120	1	1
T4020151	TraesCSU02G203800	chr2A	816598623	816599940	1	1
T4020152	TraesCSU02G201600	chr2A	816643714	816646333	1	1
T4020353	TraesCSU02G037100	chr2A	829636721	829639194	1	1
T4020354	TraesCSU02G037200	chr2A	829644386	829649706	1	1
T4020355	TraesCSU02G037300	chr2A	829650580	829653075	1	1
T4020356	TraesCSU02G037400	chr2A	829695097	829696687	1	1
T4020357	TraesCSU02G037500	chr2A	829697968	829700864	1	1
T4020476	TraesCSU02G211300	chr2B	1418332	1418709	1	1
T4020481	TraesCSU02G149200	chr2B	1664873	1666265	1	0.999282
T4020523	TraesCSU02G149100	chr2B	4036455	4038145	1	1
T4020525	TraesCSU02G243500	chr2B	4121001	4121432	1	1
T4020606	TraesCSU02G222900	chr2B	6998631	7000633	1	1
T4020607	TraesCSU02G011900	chr2B	7006395	7008551	1	1
T4020629	TraesCSU02G178400	chr2B	8002289	8003215	1	1
T4020633	TraesCSU02G227900	chr2B	8110381	8111571	1	1
T4020655	TraesCSU02G262900	chr2B	8928918	8929805	1	0.998677
T4020665	TraesCSU02G011300	chr2B	9201503	9202690	1	0.998143
T4020666	TraesCSU02G266500	chr2B	9219972	9220859	1	0.997354
T4020667	TraesCSU02G226100	chr2B	9289842	9291028	0.999158	0.995791
T4020668	TraesCSU02G011600	chr2B	9307456	9308997	1	0.997375
T4020669	TraesCSU02G247300	chr2B	9314099	9315661	1	0.997992
T4020684	TraesCSU02G182500	chr2B	10055558	10058323	1	0.99647
T4020685	TraesCSU02G010700	chr2B	10063415	10064956	1	1
T4020693	TraesCSU02G011800	chr2B	10939960	10940820	1	1
T4020719	TraesCSU02G210400	chr2B	11910049	11911208	1	1
T4020799	TraesCSU02G236700	chr2B	15883430	15883984	1	1
T4020801	TraesCSU02G238200	chr2B	15909308	15910979	1	1
T4020806	TraesCSU02G204000	chr2B	16395101	16396898	1	1
T4020812	TraesCSU02G254000	chr2B	17264365	17264937	1	1
T4020814	TraesCSU02G229300	chr2B	17306348	17308064	1	0.995597
T4020822	TraesCSU02G229400	chr2B	17557596	17559311	0.999371	0.985535
T4020825	TraesCSU02G233900	chr2B	17695352	17697200	1	1
T4020861	TraesCSU02G009400	chr2B	19130877	19131680	0.508535	0.454627
T4020947	TraesCSU02G013100	chr2B	24382071	24383244	1	1
T4021143	TraesCSU02G023100	chr2B	33874777	33876668	0.532258	0.517921
T4021148	TraesCSU02G181700	chr2B	35268390	35270133	1	0.997639
T4021151	TraesCSU02G156500	chr2B	35560225	35561631	0.932543	0.93072
T4021152	TraesCSU02G183500	chr2B	35660757	35661095	1	1
T4021180	TraesCSU02G013900	chr2B	39099894	39104282	1	1
T4021181	TraesCSU02G180000	chr2B	39241366	39245682	1	1
T4021222	TraesCSU02G176700	chr2B	42334286	42335579	1	1
T4021223	TraesCSU02G014100	chr2B	42380979	42388250	1	1
T4021224	TraesCSU02G014000	chr2B	42400921	42401805	1	1
T4021243	TraesCSU02G071800	chr2B	44268615	44268845	1	1
T4021247	TraesCSU02G208500	chr2B	44667503	44668493	1	0.998897
T4021248	TraesCSU02G242600	chr2B	44699768	44700854	1	0.997015
T4021249	TraesCSU02G146800	chr2B	44723966	44725010	1	0.992731
T4021258	TraesCSU02G207300	chr2B	44895012	44895785	1	0.99422
T4021262	TraesCSU02G014400	chr2B	45585915	45589800	1	0.997567
T4021263	TraesCSU02G014500	chr2B	45604592	45608293	1	1
T4021264	TraesCSU02G014600	chr2B	45609597	45610889	1	1
T4021346	TraesCSU02G014300	chr2B	51847888	51848211	1	0.996914
T4021376	TraesCSU02G217600	chr2B	54451940	54452756	0.985816	0.984043
T4021473	TraesCSU02G196100	chr2B	61179120	61183199	1	1
T4021474	TraesCSU02G221500	chr2B	61216804	61219622	1	1
T4021475	TraesCSU02G199500	chr2B	61243697	61247053	1	0.999444
T4021514	TraesCSU02G009700	chr2B	64920303	64920629	1	1
T4021662	TraesCSU02G195500	chr2B	84499207	84500181	0.974194	0.974194
T4021951	TraesCSU02G248900	chr2B	117406966	117408367	0.996154	0.97
T4021962	TraesCSU02G191000	chr2B	118446923	118449844	1	1
T4021963	TraesCSU02G180300	chr2B	118680695	118683004	1	1
T4021965	TraesCSU02G174600	chr2B	118773220	118775912	1	1
T4021966	TraesCSU02G199900	chr2B	118809107	118810217	0.948969	0.909881
T4021968	TraesCSU02G180700	chr2B	118942964	118945636	1	1
T4022025	TraesCSU02G251800	chr2B	124688780	124689181	1	1
T4022026	TraesCSU02G240300	chr2B	124691684	124693680	1	1
T4022027	TraesCSU02G244300	chr2B	124697338	124698433	1	1
T4022273	TraesCSU02G015100	chr2B	158417962	158419725	1	1
T4022471	TraesCSU02G137500	chr2B	181864657	181865490	1	1
T4022472	TraesCSU02G137600	chr2B	181888707	181890489	1	1
T4022584	TraesCSU02G260500	chr2B	196555418	196556023	1	0.9967
T4022592	TraesCSU02G186600	chr2B	197443852	197444967	1	1
T4022597	TraesCSU02G015400	chr2B	197755159	197755603	1	1
T4022598	TraesCSU02G221100	chr2B	197774316	197774953	1	0.998433
T4022600	TraesCSU02G202800	chr2B	197779186	197779853	1	1
T4022601	TraesCSU02G229600	chr2B	197782377	197782682	1	1
T4022602	TraesCSU02G015300	chr2B	197796117	197796437	1	1
T4022637	TraesCSU02G226000	chr2B	202384379	202386994	1	1
T4022638	TraesCSU02G194900	chr2B	202391192	202392238	1	1
T4022957	TraesCSU02G209800	chr2B	254815561	254817067	1	1
T4022959	TraesCSU02G206100	chr2B	254853352	254854749	1	1
T4022960	TraesCSU02G199700	chr2B	254870133	254871530	1	1
T4023114	TraesCSU02G123600	chr2B	292883176	292883601	1	1
T4023115	TraesCSU02G123500	chr2B	292902695	292904988	0.961689	0.961689
T4023116	TraesCSU02G123400	chr2B	292905184	292909443	1	1
T4023117	TraesCSU02G123300	chr2B	292909105	292913178	0.985591	0.985591
T4023118	TraesCSU02G123200	chr2B	292955244	292957777	1	1
T4023119	TraesCSU02G123205	chr2B	292955838	292956656	1	1
T4023120	TraesCSU02G123100	chr2B	293030871	293031386	1	1
T4023121	TraesCSU02G123000	chr2B	293047206	293048352	1	1
T4023180	TraesCSU02G198600	chr2B	332609229	332610483	1	1
T4023187	TraesCSU02G021500	chr2B	335616939	335633293	1	1
T4023436	TraesCSU02G259900	chr2B	413733783	413734093	1	1
T4023653	TraesCSU02G223900	chr2B	458187908	458189303	1	1
T4023654	TraesCSU02G249900	chr2B	458205629	458207286	0.998194	0.998194
T4023655	TraesCSU02G092400	chr2B	458239482	458241814	1	1
T4023656	TraesCSU02G092300	chr2B	458263691	458266285	1	1
T4024002	TraesCSU02G245100	chr2B	510866431	510866979	1	0.983015
T4024303	TraesCSU02G203200	chr2B	553259428	553260061	1	1
T4024448	TraesCSU02G161000	chr2B	576306999	576309002	0.634822	0.551027
T4024449	TraesCSU02G001700	chr2B	576321267	576324415	1	1
T4024450	TraesCSU02G001800	chr2B	576338960	576346007	0.999339	0.994382
T4024451	TraesCSU02G001900	chr2B	576417828	576419890	1	1
T4024452	TraesCSU02G002000	chr2B	576460962	576467875	0.999208	0.999208
T4024532	TraesCSU02G020000	chr2B	585130224	585135291	1	1
T4024533	TraesCSU02G020100	chr2B	585137050	585142104	1	1
T4024565	TraesCSU02G205900	chr2B	589482211	589483916	1	1
T4024826	TraesCSU02G192100	chr2B	633047959	633051149	0.863312	0.848257
T4025121	TraesCSU02G072900	chr2B	674587481	674592703	1	1
T4025215	TraesCSU02G168900	chr2B	685455236	685455557	1	1
T4025218	TraesCSU02G187200	chr2B	685489198	685489519	1	1
T4025220	TraesCSU02G169000	chr2B	685514856	685515176	1	0.993769
T4025245	TraesCSU02G269300	chr2B	688560284	688560659	1	1
T4025548	TraesCSU02G020300	chr2B	723730537	723731241	0.639166	0.639166
T4025549	TraesCSU02G020200	chr2B	724005590	724008371	1	1
T4025908	TraesCSU02G217300	chr2B	762518572	762519498	1	1
T4025956	TraesCSU02G010000	chr2B	767102753	767103300	0.692112	0.642494
T4026239	TraesCSU02G150400	chr2B	792689611	792691538	1	0.999255
T4026255	TraesCSU02G170000	chr2B	793884484	793884896	1	1
T4026277	TraesCSU02G021000	chr2B	795717788	795720825	1	1
T4026278	TraesCSU02G021100	chr2B	795728271	795729215	1	1
T4026279	TraesCSU02G020900	chr2B	795835172	795835895	1	1
T4026280	TraesCSU02G020800	chr2B	795856128	795859015	1	1
T4026312	TraesCSU02G252800	chr2B	798152489	798153195	1	1
T4026313	TraesCSU02G262200	chr2B	798156385	798156900	1	1
T4026314	TraesCSU02G021200	chr2B	798159408	798160120	1	1
T4026315	TraesCSU02G212400	chr2B	798176107	798176875	0.990885	0.990885
T4026316	TraesCSU02G231900	chr2B	798184802	798185278	0.973251	0.973251
T4026317	TraesCSU02G228900	chr2B	798190938	798191457	0.998062	0.998062
T4026320	TraesCSU02G231500	chr2B	798219433	798219948	1	1
T4026322	TraesCSU02G231800	chr2B	798225673	798226188	1	1
T4026545	TraesCSU02G213000	chr2B	815444616	815446499	1	1
T4026548	TraesCSU02G166400	chr2B	815583931	815585739	1	1
T4026556	TraesCSU02G157800	chr2B	816454799	816459681	1	1
T4026557	TraesCSU02G205300	chr2B	816525101	816526024	1	1
T4026558	TraesCSU02G021300	chr2B	816536919	816538938	1	1
T4026559	TraesCSU02G234100	chr2B	816548889	816550486	0.582474	0.582474
T4026580	TraesCSU02G186300	chr2B	817345748	817347077	1	0.989775
T4026585	TraesCSU02G021800	chr2B	817589542	817592592	1	1
T4026586	TraesCSU02G021900	chr2B	817613292	817617227	1	1
T4026587	TraesCSU02G022000	chr2B	817644654	817647335	1	1
T4026588	TraesCSU02G022100	chr2B	817655977	817657838	1	1
T4026595	TraesCSU02G021600	chr2B	817927662	817929054	1	1
T4026596	TraesCSU02G021700	chr2B	817934078	817935937	1	1
T4026722	TraesCSU02G153600	chr2B	828577866	828578129	1	0.988636
T4026786	TraesCSU02G176800	chr2B	832856742	832859177	1	1
T4026828	TraesCSU02G198500	chr2B	834347604	834350888	1	1
T4026829	TraesCSU02G188000	chr2B	834357056	834360827	1	1
T4026830	TraesCSU02G190700	chr2B	834373753	834376839	1	1
T4026832	TraesCSU02G162600	chr2B	834469612	834473151	1	1
T4026833	TraesCSU02G162500	chr2B	834476310	834477971	1	1
T4026834	TraesCSU02G162400	chr2B	834479555	834481083	1	1
T4026835	TraesCSU02G022400	chr2B	834487370	834490950	1	1
T4026836	TraesCSU02G022500	chr2B	834491412	834495489	1	1
T4026879	TraesCSU02G212900	chr2B	837932665	837933722	1	1
T4026880	TraesCSU02G244500	chr2B	837938442	837938990	1	1
T4026881	TraesCSU02G180800	chr2B	838000186	838001690	0.90581	0.877676
T4026912	TraesCSU02G038700	chr2B	839865424	839866912	1	1
T4026913	TraesCSU02G038600	chr2B	839874913	839876440	0.611211	0.611211
T4026915	TraesCSU02G038500	chr2B	839888662	839893850	1	1
T4026916	TraesCSU02G038400	chr2B	839899721	839901708	1	1
T4026917	TraesCSU02G038300	chr2B	839946743	839949674	1	1
T4026918	TraesCSU02G038200	chr2B	839963539	839964961	1	1
T4026920	TraesCSU02G038100	chr2B	839986472	839988643	1	1
T4026921	TraesCSU02G038000	chr2B	839988839	839990862	1	1
T4026922	TraesCSU02G037900	chr2B	840002154	840006754	1	1
T4026923	TraesCSU02G037800	chr2B	840056760	840061322	0.999441	0.999441
T4026924	TraesCSU02G037700	chr2B	840067822	840069970	1	1
T4026925	TraesCSU02G037600	chr2B	840103378	840107067	1	1
T4026926	TraesCSU02G150300	chr2B	840172194	840173193	1	1
T4026990	TraesCSU02G012900	chr2D	2364938	2366251	1	1
T4026991	TraesCSU02G012800	chr2D	2374494	2379435	1	1
T4026992	TraesCSU02G012700	chr2D	2397225	2409231	1	1
T4026993	TraesCSU02G012600	chr2D	2423830	2429164	1	1
T4026994	TraesCSU02G012500	chr2D	2433530	2438209	0.953838	0.927536
T4026995	TraesCSU02G012400	chr2D	2438375	2443551	1	1
T4026996	TraesCSU02G012300	chr2D	2455317	2459009	1	1
T4026997	TraesCSU02G012200	chr2D	2476989	2478983	1	1
T4026998	TraesCSU02G012100	chr2D	2482981	2483380	1	1
T4026999	TraesCSU02G012000	chr2D	2496848	2499237	1	0.998039
T4027000	TraesCSU02G011700	chr2D	2539997	2541403	1	1
T4027009	TraesCSU02G196400	chr2D	2660171	2660782	0.558528	0.502787
T4027165	TraesCSU02G213200	chr2D	9582851	9583332	1	0.981087
T4027213	TraesCSU02G188200	chr2D	11439334	11442156	1	1
T4027384	TraesCSU02G249100	chr2D	16171126	16172510	1	0.998617
T4027385	TraesCSU02G249000	chr2D	16195406	16196797	1	1
T4027412	TraesCSU02G022800	chr2D	17701078	17706793	1	1
T4027413	TraesCSU02G023200	chr2D	17719568	17721657	1	1
T4027414	TraesCSU02G023600	chr2D	17727428	17732088	1	1
T4027415	TraesCSU02G023500	chr2D	17732743	17736648	1	1
T4027416	TraesCSU02G024000	chr2D	17771183	17774995	1	1
T4027417	TraesCSU02G022900	chr2D	17826221	17827704	1	1
T4027430	TraesCSU02G224200	chr2D	18594367	18594708	1	1
T4027431	TraesCSU02G216500	chr2D	18645435	18645776	1	1
T4027467	TraesCSU02G245500	chr2D	20034387	20034857	1	1
T4027468	TraesCSU02G245200	chr2D	20038716	20038991	1	1
T4027487	TraesCSU02G212500	chr2D	21408191	21410193	1	1
T4027488	TraesCSU02G023700	chr2D	21430829	21431785	1	1
T4027489	TraesCSU02G023800	chr2D	21434787	21435711	1	1
T4027490	TraesCSU02G023900	chr2D	21442197	21443137	1	1
T4027492	TraesCSU02G023000	chr2D	21493953	21501553	1	1
T4027508	TraesCSU02G024200	chr2D	22823954	22826062	1	1
T4027509	TraesCSU02G024300	chr2D	22840166	22842072	1	1
T4027550	TraesCSU02G268100	chr2D	25206211	25206506	1	1
T4027570	TraesCSU02G217200	chr2D	26030843	26031848	1	1
T4027571	TraesCSU02G258400	chr2D	26062724	26063375	1	1
T4027593	TraesCSU02G024900	chr2D	27247763	27251053	0.999696	0.999392
T4027616	TraesCSU02G225700	chr2D	28829821	28830714	1	1
T4027618	TraesCSU02G024800	chr2D	28900088	28901023	0.787879	0.787879
T4027619	TraesCSU02G024700	chr2D	28907986	28909086	1	1
T4027621	TraesCSU02G024500	chr2D	28945464	28946289	1	1
T4027697	TraesCSU02G233100	chr2D	34024772	34025273	1	1
T4027700	TraesCSU02G226300	chr2D	34102149	34102652	1	0.995062
T4027760	TraesCSU02G189700	chr2D	36906954	36908384	1	1
T4027763	TraesCSU02G025000	chr2D	36959278	36961140	1	1
T4027764	TraesCSU02G025100	chr2D	36963848	36965231	1	1
T4027765	TraesCSU02G025200	chr2D	36974965	36978299	1	1
T4027766	TraesCSU02G025300	chr2D	37016293	37016565	1	1
T4027767	TraesCSU02G025400	chr2D	37027316	37029556	1	1
T4027785	TraesCSU02G185900	chr2D	37822060	37823264	0.998004	0.972056
T4027833	TraesCSU02G139900	chr2D	40515656	40520424	1	1
T4028401	TraesCSU02G215000	chr2D	92214163	92216051	0.961778	0.911111
T4028899	TraesCSU02G224500	chr2D	147476449	147476823	1	0.957333
T4029049	TraesCSU02G047400	chr2D	169479975	169485333	0.635992	0.635992
T4029050	TraesCSU02G047900	chr2D	169556869	169563415	1	1
T4029338	TraesCSU02G075600	chr2D	216019386	216020815	0.918971	0.841158
T4029510	TraesCSU02G221700	chr2D	295617178	295617726	1	0.992714
T4029521	TraesCSU02G268200	chr2D	295625981	295626121	1	1
T4029527	TraesCSU02G253000	chr2D	295660158	295660298	1	1
T4029553	TraesCSU02G114300	chr2D	304003469	304015836	1	1
T4029554	TraesCSU02G114200	chr2D	304022956	304025928	1	1
T4029947	TraesCSU02G107500	chr2D	385527893	385529130	1	1
T4029949	TraesCSU02G107400	chr2D	385680013	385681260	1	1
T4029950	TraesCSU02G107300	chr2D	385706161	385708243	1	1
T4029951	TraesCSU02G107200	chr2D	385709658	385713587	1	1
T4029952	TraesCSU02G107100	chr2D	385745774	385751165	1	1
T4029977	TraesCSU02G022600	chr2D	390995136	390997028	1	1
T4029978	TraesCSU02G022700	chr2D	391001991	391004100	1	1
T4029990	TraesCSU02G103600	chr2D	395389624	395394143	1	1
T4031326	TraesCSU02G205000	chr2D	571538478	571538993	1	1
T4031327	TraesCSU02G159600	chr2D	571560480	571561577	0.999001	0.995005
T4031328	TraesCSU02G215400	chr2D	571638510	571639711	1	0.995471
T4031844	TraesCSU02G145800	chr2D	617677714	617678111	0.982716	0.898765
T4031884	TraesCSU02G029300	chr2D	620944433	620949876	1	1
T4032072	TraesCSU02G243900	chr2D	634956463	634956834	1	0.994624
T4032077	TraesCSU02G262800	chr2D	634966043	634966234	1	1
T4032161	TraesCSU02G187400	chr2D	640610637	640613239	0.989432	0.952444
T4032286	TraesCSU02G016300	chr2D	650861319	650865647	1	1
T4032287	TraesCSU02G016400	chr2D	650867590	650870437	1	1
T4032709	TraesCSU02G056800	chr2D	676601575	676603718	0.978485	0.96913
T4032751	TraesCSU02G245600	chr2D	678915980	678916285	1	1
T4032846	TraesCSU02G038800	chr2D	685257428	685258758	1	0.997955
T4032847	TraesCSU02G146500	chr2D	685347614	685352828	1	1
T4032850	TraesCSU02G106500	chr2D	685377440	685377580	1	1
T4032902	TraesCSU02G169600	chr2D	687798739	687800380	1	1
T4033034	TraesCSU02G268500	chr2D	694440206	694440316	1	1
T4033119	TraesCSU02G037000	chr2D	699101866	699106805	0.931692	0.903627
T4033128	TraesCSU02G036800	chr2D	699257471	699262088	1	1
T4033129	TraesCSU02G036700	chr2D	699262860	699268456	1	1
T4033130	TraesCSU02G036600	chr2D	699270239	699275169	1	1
T4033132	TraesCSU02G036400	chr2D	699382631	699384173	1	1
T4033133	TraesCSU02G036300	chr2D	699385761	699390314	1	1
T4033134	TraesCSU02G036200	chr2D	699446755	699448194	1	1
T4033213	TraesCSU02G208100	chr3A	53667	56642	0.946649	0.946649
T4033219	TraesCSU02G039500	chr3A	231893	233137	1	1
T4033220	TraesCSU02G039600	chr3A	233639	234395	1	1
T4033235	TraesCSU02G038900	chr3A	1398859	1402572	1	1
T4033236	TraesCSU02G039000	chr3A	1431235	1434314	1	1
T4033245	TraesCSU02G215600	chr3A	2077838	2078137	1	1
T4033246	TraesCSU02G039100	chr3A	2084771	2085473	1	1
T4033248	TraesCSU02G039700	chr3A	2139069	2139356	1	1
T4033249	TraesCSU02G039800	chr3A	2163305	2166105	1	1
T4033250	TraesCSU02G039900	chr3A	2168075	2176771	1	1
T4033251	TraesCSU02G040000	chr3A	2187510	2190442	1	1
T4033252	TraesCSU02G040100	chr3A	2206155	2213389	1	1
T4033258	TraesCSU02G186100	chr3A	2404109	2406103	0.997382	0.963351
T4033417	TraesCSU02G260100	chr3A	15447066	15448063	0.992308	0.940659
T4033425	TraesCSU02G156300	chr3A	15758446	15760645	0.931612	0.850311
T4033435	TraesCSU02G159400	chr3A	16512819	16515438	0.75	0.704355
T4033437	TraesCSU02G046400	chr3A	16545698	16546976	0.998255	0.91623
T4033469	TraesCSU02G040400	chr3A	17335090	17336074	1	1
T4033470	TraesCSU02G177300	chr3A	17339183	17340112	1	1
T4033471	TraesCSU02G177200	chr3A	17341777	17342769	1	1
T4033582	TraesCSU02G040500	chr3A	23994383	23996119	1	1
T4033819	TraesCSU02G090500	chr3A	41855704	41861539	0.899676	0.887194
T4034113	TraesCSU02G148900	chr3A	65006910	65007458	1	1
T4034120	TraesCSU02G249700	chr3A	65621760	65621999	1	0.995833
T4034151	TraesCSU02G051000	chr3A	67339074	67339625	1	1
T4034152	TraesCSU02G050900	chr3A	67371694	67372245	1	1
T4034288	TraesCSU02G267000	chr3A	77791685	77791939	1	0.988235
T4034291	TraesCSU02G260800	chr3A	77796866	77797036	1	0.994152
T4034297	TraesCSU02G257000	chr3A	77819553	77819729	1	0.99435
T4034786	TraesCSU02G250700	chr3A	158211122	158212269	1	0.999048
T4034787	TraesCSU02G165500	chr3A	158223627	158224190	1	0.996454
T4034892	TraesCSU02G152100	chr3A	182977569	182981256	0.960695	0.960695
T4034906	TraesCSU02G190000	chr3A	184692880	184693090	1	1
T4034934	TraesCSU02G227400	chr3A	190300417	190301143	0.993927	0.993927
T4035251	TraesCSU02G135700	chr3A	347139600	347141159	0.817961	0.817961
T4035252	TraesCSU02G159100	chr3A	347577434	347579953	1	1
T4035471	TraesCSU02G174000	chr3A	435275452	435276156	1	1
T4035540	TraesCSU02G117900	chr3A	458126750	458129837	1	1
T4035541	TraesCSU02G117800	chr3A	458131703	458133031	1	1
T4035542	TraesCSU02G117700	chr3A	458137697	458146062	1	1
T4035543	TraesCSU02G117600	chr3A	458160604	458163859	1	1
T4035544	TraesCSU02G117500	chr3A	458277611	458278315	1	1
T4035545	TraesCSU02G265500	chr3A	458298698	458298994	1	1
T4035546	TraesCSU02G265300	chr3A	458307977	458308273	1	1
T4035547	TraesCSU02G271300	chr3A	458317253	458317549	1	0.996633
T4035548	TraesCSU02G270800	chr3A	458326662	458326958	1	1
T4035636	TraesCSU02G062900	chr3A	475850379	475857566	1	1
T4035713	TraesCSU02G067800	chr3A	489685617	489688073	0.570721	0.534397
T4035831	TraesCSU02G114900	chr3A	510557438	510558676	1	1
T4035832	TraesCSU02G114800	chr3A	510647584	510648903	1	1
T4035833	TraesCSU02G114700	chr3A	510660691	510661272	1	1
T4036284	TraesCSU02G040600	chr3A	576829211	576832965	1	1
T4036502	TraesCSU02G094400	chr3A	607461712	607463026	0.761436	0.761436
T4036504	TraesCSU02G094000	chr3A	607536567	607536938	1	1
T4036750	TraesCSU02G270300	chr3A	641933956	641934132	1	0.983051
T4036759	TraesCSU02G268000	chr3A	642057811	642057921	1	0.990991
T4036775	TraesCSU02G157200	chr3A	643685673	643685883	1	1
T4036971	TraesCSU02G011500	chr3A	663886490	663889953	1	0.997995
T4037470	TraesCSU02G259000	chr3A	710349960	710350565	1	1
T4037471	TraesCSU02G224300	chr3A	710354693	710355283	1	1
T4037472	TraesCSU02G257680	chr3A	710359651	710360937	1	0.996115
T4037474	TraesCSU02G238900	chr3A	710373908	710374734	1	1
T4037475	TraesCSU02G231700	chr3A	710378966	710379571	1	1
T4037831	TraesCSU02G079600	chr3A	743136133	743151358	1	1
T4037887	TraesCSU02G040700	chr3A	748015878	748019676	1	1
T4037888	TraesCSU02G249300	chr3A	748025574	748026055	1	1
T4037926	TraesCSU02G224900	chr3A	751759437	751760564	1	0.998227
T4038020	TraesCSU02G210100	chr3A	757502109	757502945	1	1
T4038049	TraesCSU02G237800	chr3A	759066873	759068665	1	0.997792
T4038089	TraesCSU02G197300	chr3A	764146251	764147405	1	1
T4038331	TraesCSU02G058500	chr3A	782568773	782573467	0.833568	0.800423
T4038350	TraesCSU02G266000	chr3A	783343119	783343833	1	0.998039
T4038433	TraesCSU02G240200	chr3A	789509777	789510362	1	1
T4038495	TraesCSU02G053700	chr3A	793916920	793918146	0.906923	0.857692
T4038515	TraesCSU02G226800	chr3A	795634032	795634741	1	1
T4038516	TraesCSU02G251700	chr3A	795684864	795685573	1	0.997163
T4038558	TraesCSU02G256000	chr3A	799060551	799061198	1	1
T4038563	TraesCSU02G256500	chr3A	799233434	799234081	1	0.994845
T4038604	TraesCSU02G221200	chr3A	801139039	801141361	1	0.999489
T4038605	TraesCSU02G184600	chr3A	801566182	801567039	1	0.967366
T4038795	TraesCSU02G042300	chr3B	3542639	3543070	1	1
T4038796	TraesCSU02G041900	chr3B	3557241	3557654	1	1
T4038797	TraesCSU02G206600	chr3B	3561658	3562065	1	1
T4038798	TraesCSU02G179700	chr3B	3568923	3570667	0.820244	0.794066
T4038858	TraesCSU02G166900	chr3B	5792555	5797755	1	1
T4038859	TraesCSU02G166800	chr3B	5800077	5803829	1	1
T4038860	TraesCSU02G050600	chr3B	5806032	5807955	1	1
T4038862	TraesCSU02G178600	chr3B	5834532	5835666	1	1
T4038872	TraesCSU02G212300	chr3B	6391051	6394411	1	1
T4038873	TraesCSU02G041400	chr3B	6415623	6416900	1	1
T4038874	TraesCSU02G041300	chr3B	6421058	6425702	1	0.999423
T4038875	TraesCSU02G042000	chr3B	6474922	6478079	1	1
T4038876	TraesCSU02G042100	chr3B	6482293	6484566	1	1
T4038877	TraesCSU02G187300	chr3B	6511968	6516787	1	1
T4038878	TraesCSU02G041600	chr3B	6532992	6534360	1	1
T4038879	TraesCSU02G162800	chr3B	6546976	6550044	1	1
T4038880	TraesCSU02G193900	chr3B	6564668	6565687	1	1
T4038881	TraesCSU02G041800	chr3B	6620881	6622530	1	1
T4038887	TraesCSU02G053800	chr3B	7055786	7057570	1	1
T4038888	TraesCSU02G053900	chr3B	7065842	7067283	1	1
T4038903	TraesCSU02G219200	chr3B	7536163	7536726	0.786325	0.755556
T4038904	TraesCSU02G179400	chr3B	7545326	7546303	1	1
T4038911	TraesCSU02G182200	chr3B	7706663	7706935	1	1
T4038918	TraesCSU02G044800	chr3B	7880066	7880286	0.598916	0.569106
T4038920	TraesCSU02G045800	chr3B	7962204	7964025	1	1
T4038929	TraesCSU02G046000	chr3B	8166165	8169003	1	1
T4038933	TraesCSU02G166300	chr3B	8254653	8256839	1	1
T4038936	TraesCSU02G167900	chr3B	8338743	8345201	1	1
T4038937	TraesCSU02G167800	chr3B	8339508	8342375	1	1
T4038947	TraesCSU02G208000	chr3B	8654960	8656652	1	1
T4038948	TraesCSU02G045300	chr3B	8678873	8680564	1	1
T4038949	TraesCSU02G221400	chr3B	8701285	8702630	1	1
T4038952	TraesCSU02G056500	chr3B	9252247	9253623	1	1
T4038953	TraesCSU02G175100	chr3B	9382006	9383199	1	1
T4038955	TraesCSU02G042700	chr3B	9434371	9435706	1	1
T4038956	TraesCSU02G163800	chr3B	9493583	9495308	1	1
T4038957	TraesCSU02G235100	chr3B	9777702	9778856	1	1
T4038958	TraesCSU02G166600	chr3B	9789171	9789542	1	1
T4038960	TraesCSU02G045400	chr3B	9805096	9807538	1	1
T4038961	TraesCSU02G045500	chr3B	9810029	9811780	1	1
T4038962	TraesCSU02G158800	chr3B	9858616	9861476	1	1
T4038963	TraesCSU02G044400	chr3B	9866648	9867933	1	1
T4038964	TraesCSU02G044300	chr3B	9872827	9875563	1	1
T4038965	TraesCSU02G044200	chr3B	9879716	9881912	1	1
T4038966	TraesCSU02G044100	chr3B	9882655	9886644	1	1
T4038967	TraesCSU02G212800	chr3B	9892315	9893785	1	1
T4038968	TraesCSU02G049900	chr3B	9908523	9908900	1	1
T4038969	TraesCSU02G050000	chr3B	9912199	9914682	1	1
T4038970	TraesCSU02G156200	chr3B	9916782	9921585	1	1
T4038971	TraesCSU02G046500	chr3B	9932452	9935467	1	1
T4038972	TraesCSU02G156400	chr3B	9938040	9939320	1	1
T4038973	TraesCSU02G233600	chr3B	9941213	9943317	1	1
T4038974	TraesCSU02G040200	chr3B	9948305	9951200	1	1
T4038975	TraesCSU02G156000	chr3B	9980379	9980789	1	1
T4038976	TraesCSU02G156100	chr3B	9990596	9993058	1	1
T4038977	TraesCSU02G178300	chr3B	10008030	10011165	1	1
T4038978	TraesCSU02G189800	chr3B	10087446	10088476	1	1
T4038979	TraesCSU02G203400	chr3B	10088477	10091080	0.792085	0.727549
T4038980	TraesCSU02G192900	chr3B	10127538	10128859	1	1
T4038981	TraesCSU02G173500	chr3B	10137617	10139179	1	1
T4038982	TraesCSU02G159000	chr3B	10147400	10148011	1	1
T4038984	TraesCSU02G154900	chr3B	10310366	10311124	1	1
T4038985	TraesCSU02G208300	chr3B	10311125	10311870	0.606516	0.548037
T4038987	TraesCSU02G155800	chr3B	10342734	10344220	1	1
T4038988	TraesCSU02G164100	chr3B	10417886	10420142	0.972936	0.97023
T4038989	TraesCSU02G196600	chr3B	10429038	10430506	1	1
T4038990	TraesCSU02G172600	chr3B	10456607	10458074	0.999082	0.999082
T4038991	TraesCSU02G164200	chr3B	10484075	10485568	0.996327	0.995409
T4038992	TraesCSU02G159300	chr3B	10511421	10512891	0.998163	0.998163
T4038993	TraesCSU02G185700	chr3B	10538766	10540234	1	1
T4038994	TraesCSU02G046300	chr3B	10593451	10595437	0.612643	0.545393
T4038997	TraesCSU02G176000	chr3B	10648392	10650684	1	1
T4038998	TraesCSU02G165300	chr3B	10657047	10664932	1	1
T4038999	TraesCSU02G164800	chr3B	10661374	10664045	1	1
T4039001	TraesCSU02G160500	chr3B	10693116	10696493	1	1
T4039003	TraesCSU02G043300	chr3B	10743084	10744029	1	1
T4039005	TraesCSU02G208200	chr3B	10827162	10828117	1	1
T4039006	TraesCSU02G045900	chr3B	11483920	11487650	1	1
T4039007	TraesCSU02G044900	chr3B	11490719	11492200	1	1
T4039009	TraesCSU02G043200	chr3B	11781087	11784819	1	1
T4039010	TraesCSU02G216800	chr3B	11827931	11829438	1	1
T4039011	TraesCSU02G040300	chr3B	11838398	11839484	0.745889	0.693572
T4039012	TraesCSU02G175300	chr3B	11979138	11981489	1	1
T4039013	TraesCSU02G045700	chr3B	12084042	12085509	1	1
T4039014	TraesCSU02G196900	chr3B	12235773	12236096	1	1
T4039015	TraesCSU02G043600	chr3B	12254874	12256304	1	1
T4039016	TraesCSU02G043700	chr3B	12259606	12261393	1	1
T4039017	TraesCSU02G043800	chr3B	12265771	12269410	1	0.998761
T4039020	TraesCSU02G046200	chr3B	12428927	12430502	1	1
T4039135	TraesCSU02G050700	chr3B	18160932	18162131	0.892711	0.891892
T4039140	TraesCSU02G046100	chr3B	18462269	18463460	0.996835	0.949367
T4039148	TraesCSU02G250400	chr3B	18734040	18734663	1	1
T4039263	TraesCSU02G046700	chr3B	26273667	26279634	1	1
T4039280	TraesCSU02G055400	chr3B	27506492	27507040	1	0.993631
T4039393	TraesCSU02G046900	chr3B	34261746	34262195	1	1
T4039394	TraesCSU02G047000	chr3B	34265081	34266033	1	1
T4039396	TraesCSU02G202300	chr3B	34301958	34302869	1	1
T4039408	TraesCSU02G206900	chr3B	35017142	35017729	1	1
T4039409	TraesCSU02G207000	chr3B	35017853	35018233	1	1
T4039412	TraesCSU02G222300	chr3B	35065752	35066991	1	1
T4039420	TraesCSU02G173900	chr3B	35664718	35666420	0.727712	0.661117
T4039430	TraesCSU02G231600	chr3B	36887030	36888144	1	0.998246
T4039479	TraesCSU02G212000	chr3B	41176802	41177203	1	1
T4039491	TraesCSU02G244100	chr3B	42632381	42633418	1	1
T4039497	TraesCSU02G154200	chr3B	42954990	42955321	0.954023	0.931034
T4039499	TraesCSU02G258000	chr3B	43062641	43063319	1	0.968927
T4039501	TraesCSU02G048200	chr3B	43254165	43256290	1	1
T4039512	TraesCSU02G237900	chr3B	44697438	44697785	1	0.979885
T4039515	TraesCSU02G176300	chr3B	44806812	44807108	1	1
T4039521	TraesCSU02G147300	chr3B	44895609	44895958	0.997126	0.994253
T4039529	TraesCSU02G179500	chr3B	46323012	46323974	1	1
T4039558	TraesCSU02G147600	chr3B	49305078	49305391	1	1
T4039591	TraesCSU02G257700	chr3B	51905612	51906824	1	1
T4039592	TraesCSU02G048300	chr3B	52004393	52005883	1	0.996885
T4039633	TraesCSU02G075500	chr3B	55423956	55438419	0.998273	0.94905
T4039636	TraesCSU02G227100	chr3B	55820143	55820636	1	1
T4039638	TraesCSU02G209200	chr3B	55855454	55856582	1	1
T4039639	TraesCSU02G227000	chr3B	55857415	55858079	1	1
T4039640	TraesCSU02G048800	chr3B	55908944	55909664	1	1
T4039641	TraesCSU02G048700	chr3B	55921206	55921984	1	1
T4039642	TraesCSU02G049000	chr3B	56045084	56046217	0.999048	0.998095
T4039644	TraesCSU02G177100	chr3B	56067316	56069725	0.995527	0.99503
T4039646	TraesCSU02G048600	chr3B	56174773	56176873	1	1
T4039647	TraesCSU02G048500	chr3B	56183308	56185634	1	1
T4039648	TraesCSU02G048400	chr3B	56198016	56198740	1	1
T4039743	TraesCSU02G155300	chr3B	64317090	64317395	0.576271	0.576271
T4039769	TraesCSU02G177600	chr3B	65844352	65847487	1	1
T4039804	TraesCSU02G235400	chr3B	69136318	69137745	1	1
T4039820	TraesCSU02G241800	chr3B	71426412	71426858	1	1
T4039858	TraesCSU02G049600	chr3B	75649274	75650166	1	1
T4039859	TraesCSU02G153400	chr3B	75690482	75691359	1	1
T4039860	TraesCSU02G149500	chr3B	75718510	75719676	1	1
T4039861	TraesCSU02G149600	chr3B	75752620	75753051	0.595041	0.595041
T4040027	TraesCSU02G049500	chr3B	89275993	89276482	1	1
T4040057	TraesCSU02G049800	chr3B	92057282	92060660	1	1
T4040199	TraesCSU02G246500	chr3B	117155453	117155866	1	0.990338
T4040822	TraesCSU02G261700	chr3B	221017079	221017642	1	0.998227
T4041258	TraesCSU02G050100	chr3B	371935454	371948854	1	1
T4042153	TraesCSU02G136600	chr3B	550474385	550475882	1	1
T4042155	TraesCSU02G258600	chr3B	554576725	554577932	0.999173	0.995864
T4042183	TraesCSU02G061900	chr3B	558067869	558069328	1	1
T4042264	TraesCSU02G099000	chr3B	570799466	570801011	1	1
T4043246	TraesCSU02G154600	chr3B	710016622	710018622	1	0.997475
T4043733	TraesCSU02G198300	chr3B	769864510	769866000	1	1
T4043734	TraesCSU02G198100	chr3B	769875182	769875421	1	1
T4043753	TraesCSU02G167300	chr3B	770747686	770750045	1	1
T4043754	TraesCSU02G064400	chr3B	770788075	770790992	1	1
T4043755	TraesCSU02G064500	chr3B	770791920	770792570	1	1
T4043756	TraesCSU02G055600	chr3B	770860539	770861396	1	0.962704
T4043834	TraesCSU02G242700	chr3B	777507799	777509022	1	1
T4043835	TraesCSU02G146900	chr3B	777533698	777534712	1	1
T4043836	TraesCSU02G243700	chr3B	777546197	777547260	1	0.996767
T4043837	TraesCSU02G264800	chr3B	777559489	777560208	1	0.992138
T4043849	TraesCSU02G255000	chr3B	778439233	778440098	1	1
T4043850	TraesCSU02G189900	chr3B	778447302	778452162	1	1
T4043852	TraesCSU02G050800	chr3B	778521325	778523885	0.992864	0.992864
T4043858	TraesCSU02G181600	chr3B	779559487	779560668	1	0.996616
T4043860	TraesCSU02G185600	chr3B	779679102	779680283	1	1
T4043913	TraesCSU02G203900	chr3B	783405899	783406450	1	1
T4043951	TraesCSU02G202500	chr3B	787993060	787995288	1	1
T4044041	TraesCSU02G180600	chr3B	797640364	797641786	1	1
T4044042	TraesCSU02G185300	chr3B	797646351	797646746	1	0.997475
T4044043	TraesCSU02G195600	chr3B	797743852	797744520	1	1
T4044044	TraesCSU02G051600	chr3B	797780736	797781740	1	1
T4044045	TraesCSU02G212100	chr3B	797812805	797813587	1	1
T4044046	TraesCSU02G229900	chr3B	798081884	798084307	1	1
T4044047	TraesCSU02G195200	chr3B	798091672	798092781	1	1
T4044049	TraesCSU02G188600	chr3B	798214019	798214708	1	0.998551
T4044073	TraesCSU02G051200	chr3B	799615906	799617279	1	1
T4044074	TraesCSU02G172800	chr3B	799674604	799675728	1	1
T4044221	TraesCSU02G232600	chr3B	813422543	813424126	1	1
T4044336	TraesCSU02G052000	chr3B	823410701	823411861	1	1
T4044340	TraesCSU02G250300	chr3B	823818947	823819276	1	1
T4044368	TraesCSU02G052200	chr3B	825370446	825371203	1	1
T4044370	TraesCSU02G052100	chr3B	825427876	825431076	1	1
T4044377	TraesCSU02G237700	chr3B	825670056	825670969	1	0.996718
T4044497	TraesCSU02G243200	chr3B	835126766	835127517	0.997347	0.996021
T4044510	TraesCSU02G205400	chr3B	836038170	836039521	0.8125	0.8125
T4044526	TraesCSU02G202700	chr3B	838553134	838553625	1	1
T4044535	TraesCSU02G145000	chr3B	839431731	839432942	1	0.9967
T4044596	TraesCSU02G052900	chr3B	844177549	844180524	1	1
T4044597	TraesCSU02G052800	chr3B	844194705	844197633	1	1
T4044598	TraesCSU02G052700	chr3B	844198021	844207931	1	1
T4044599	TraesCSU02G052600	chr3B	844215836	844219845	1	1
T4044600	TraesCSU02G052500	chr3B	844220120	844220263	1	1
T4044601	TraesCSU02G052400	chr3B	844222913	844224431	1	1
T4044653	TraesCSU02G053000	chr3B	848104142	848108986	1	1
T4044660	TraesCSU02G183900	chr3B	849046057	849046763	1	0.939007
T4044738	TraesCSU02G053100	chr3B	854345805	854347574	1	1
T4044797	TraesCSU02G097500	chr3B	859530225	859531248	0.998737	0.917929
T4044819	TraesCSU02G053300	chr3B	860525904	860528017	1	1
T4044888	TraesCSU02G239600	chr3B	865736345	865737961	0.999346	0.998038
T4044890	TraesCSU02G170200	chr3B	865835653	865838430	1	1
T4044891	TraesCSU02G245300	chr3B	865848385	865849524	1	0.998246
T4044902	TraesCSU02G254200	chr3B	866376051	866376989	1	0.99787
T4044903	TraesCSU02G054000	chr3B	866417822	866421050	1	0.999286
T4044904	TraesCSU02G054200	chr3B	866464769	866466012	0.999194	0.999194
T4044905	TraesCSU02G257200	chr3B	866485260	866486497	0.917388	0.917388
T4044906	TraesCSU02G054452	chr3B	866498401	866501782	1	1
T4044908	TraesCSU02G054100	chr3B	866873149	866877614	1	0.998559
T4044940	TraesCSU02G171600	chr3B	868752794	868754269	1	0.99458
T4044942	TraesCSU02G055200	chr3B	869206555	869206975	1	1
T4044943	TraesCSU02G055300	chr3B	869213880	869214950	1	1
T4044944	TraesCSU02G184700	chr3B	869262889	869263746	1	1
T4045022	TraesCSU02G054800	chr3B	874163036	874164589	1	1
T4045023	TraesCSU02G055700	chr3B	874169437	874171581	1	1
T4045024	TraesCSU02G055800	chr3B	874171213	874174098	1	1
T4045028	TraesCSU02G055100	chr3B	874267804	874270608	1	1
T4045068	TraesCSU02G194600	chr3B	877646783	877647238	1	1
T4045069	TraesCSU02G164000	chr3B	877652936	877654067	0.999012	0.999012
T4045071	TraesCSU02G168300	chr3B	878263463	878265891	1	1
T4045072	TraesCSU02G164500	chr3B	878287024	878287770	1	1
T4045074	TraesCSU02G054900	chr3B	878433695	878435628	1	1
T4045075	TraesCSU02G055000	chr3B	878437285	878438545	1	1
T4045076	TraesCSU02G155400	chr3B	878440545	878441243	1	1
T4045087	TraesCSU02G155000	chr3B	879279154	879280341	0.996641	0.86314
T4045091	TraesCSU02G202200	chr3B	879945681	879946698	0.642923	0.608696
T4045151	TraesCSU02G235300	chr3B	884654602	884655186	1	1
T4045237	TraesCSU02G039200	chr3D	3289278	3289634	1	0.938375
T4045262	TraesCSU02G183300	chr3D	4538827	4541548	1	1
T4045285	TraesCSU02G044600	chr3D	5055511	5056632	0.728981	0.670623
T4045332	TraesCSU02G112600	chr3D	6736297	6736446	1	1
T4045333	TraesCSU02G112700	chr3D	6739167	6742231	1	1
T4045334	TraesCSU02G112800	chr3D	6744586	6745446	1	1
T4045335	TraesCSU02G112900	chr3D	6774219	6777779	1	1
T4045530	TraesCSU02G133900	chr3D	15271641	15273835	1	1
T4045531	TraesCSU02G133800	chr3D	15447177	15448241	1	1
T4045532	TraesCSU02G133700	chr3D	15451561	15454540	1	1
T4045632	TraesCSU02G110700	chr3D	20864343	20867331	1	1
T4045634	TraesCSU02G110500	chr3D	21015256	21019312	1	1
T4045635	TraesCSU02G110400	chr3D	21021636	21022742	1	1
T4045636	TraesCSU02G110300	chr3D	21063474	21065320	1	1
T4045637	TraesCSU02G110200	chr3D	21073088	21074697	1	1
T4045666	TraesCSU02G227200	chr3D	24207269	24208307	0.693657	0.668016
T4045718	TraesCSU02G252600	chr3D	26563997	26564219	1	0.990991
T4045723	TraesCSU02G263600	chr3D	26575567	26575743	1	0.99435
T4045739	TraesCSU02G028100	chr3D	28797664	28801685	1	1
T4045907	TraesCSU02G049200	chr3D	39273808	39279793	0.97797	0.937619
T4045918	TraesCSU02G028700	chr3D	40038123	40041190	1	1
T4045919	TraesCSU02G028800	chr3D	40066877	40070335	1	1
T4046102	TraesCSU02G253100	chr3D	52771219	52771788	1	0.991228
T4046104	TraesCSU02G253300	chr3D	52772358	52772639	1	0.992908
T4046106	TraesCSU02G157600	chr3D	52773623	52774036	1	0.997585
T4046107	TraesCSU02G255700	chr3D	52773645	52774142	1	0.993976
T4046108	TraesCSU02G255800	chr3D	52774470	52774685	1	1
T4046111	TraesCSU02G221600	chr3D	52779434	52779865	1	0.997685
T4046117	TraesCSU02G214300	chr3D	52791636	52791731	1	1
T4046165	TraesCSU02G204800	chr3D	56969696	56970511	1	1
T4046226	TraesCSU02G113100	chr3D	62965876	62966299	1	1
T4046227	TraesCSU02G113200	chr3D	63009370	63010865	1	1
T4046228	TraesCSU02G132100	chr3D	63283299	63297627	1	1
T4046323	TraesCSU02G041200	chr3D	74723016	74723630	1	1
T4046453	TraesCSU02G007400	chr3D	96093059	96093816	1	1
T4046763	TraesCSU02G213100	chr3D	143125495	143125976	1	0.981087
T4047008	TraesCSU02G158500	chr3D	184048546	184048743	1	1
T4047066	TraesCSU02G144400	chr3D	194826936	194827370	1	1
T4047072	TraesCSU02G057700	chr3D	195886538	195888486	1	1
T4047073	TraesCSU02G057800	chr3D	195894738	195895283	1	1
T4047174	TraesCSU02G127800	chr3D	257263168	257265407	1	0.999423
T4047298	TraesCSU02G116700	chr3D	302331411	302335228	1	1
T4047412	TraesCSU02G113500	chr3D	323802215	323807692	1	1
T4047413	TraesCSU02G113400	chr3D	323809601	323812521	1	1
T4047808	TraesCSU02G127500	chr3D	389417514	389418698	1	1
T4047809	TraesCSU02G127200	chr3D	389459578	389460408	1	1
T4047811	TraesCSU02G127000	chr3D	389467279	389470745	1	1
T4047815	TraesCSU02G126700	chr3D	389538650	389543914	1	1
T4047816	TraesCSU02G126600	chr3D	389563873	389565565	1	1
T4047817	TraesCSU02G126400	chr3D	389592384	389593888	1	1
T4047818	TraesCSU02G126300	chr3D	389613900	389617066	1	1
T4047819	TraesCSU02G126200	chr3D	389648164	389651306	1	1
T4047820	TraesCSU02G126100	chr3D	389740844	389745233	1	1
T4047821	TraesCSU02G126000	chr3D	389746400	389749728	1	1
T4047822	TraesCSU02G125900	chr3D	389773173	389774111	1	1
T4047823	TraesCSU02G125800	chr3D	389800994	389801376	1	1
T4047824	TraesCSU02G125700	chr3D	389832966	389842094	1	1
T4047825	TraesCSU02G125600	chr3D	389873751	389876647	1	1
T4047826	TraesCSU02G125500	chr3D	389880422	389881760	1	1
T4047920	TraesCSU02G185800	chr3D	403406421	403407414	1	0.996732
T4047923	TraesCSU02G027800	chr3D	403722005	403728137	1	1
T4047924	TraesCSU02G027900	chr3D	403742575	403743451	1	1
T4049168	TraesCSU02G228300	chr3D	541213915	541214302	0.967581	0.967581
T4049673	TraesCSU02G244900	chr3D	587589013	587589837	1	0.995246
T4049731	TraesCSU02G171500	chr3D	593489025	593490646	0.939742	0.939742
T4049733	TraesCSU02G255300	chr3D	593631977	593632776	1	1
T4049863	TraesCSU02G126500	chr3D	603276374	603276865	1	0.963415
T4049956	TraesCSU02G140000	chr3D	610696904	610699496	1	1
T4050170	TraesCSU02G057600	chr3D	623873921	623874642	1	1
T4050172	TraesCSU02G057500	chr3D	623939088	623940204	1	1
T4050265	TraesCSU02G257100	chr3D	629429035	629429289	1	0.992157
T4050272	TraesCSU02G246400	chr3D	629437845	629438006	1	1
T4050273	TraesCSU02G255600	chr3D	629438831	629439244	1	0.995169
T4050276	TraesCSU02G272400	chr3D	629447240	629447350	1	1
T4050281	TraesCSU02G156900	chr3D	629488525	629488780	1	1
T4050283	TraesCSU02G264600	chr3D	629502342	629502614	1	1
T4050286	TraesCSU02G234700	chr3D	629511015	629511176	1	1
T4050341	TraesCSU02G129400	chr3D	632344582	632348898	1	1
T4050345	TraesCSU02G129800	chr3D	632395065	632395601	1	1
T4050346	TraesCSU02G129900	chr3D	632395808	632396720	1	1
T4050347	TraesCSU02G130000	chr3D	632396848	632401463	1	1
T4050348	TraesCSU02G130100	chr3D	632400258	632401439	1	1
T4050349	TraesCSU02G130200	chr3D	632401820	632404844	1	1
T4050350	TraesCSU02G130300	chr3D	632520506	632522367	1	1
T4050351	TraesCSU02G130400	chr3D	632523287	632525342	1	1
T4050352	TraesCSU02G130500	chr3D	632529826	632531224	0.496237	0.496237
T4050356	TraesCSU02G130800	chr3D	632562462	632564171	1	1
T4050357	TraesCSU02G130900	chr3D	632571717	632573268	1	1
T4050358	TraesCSU02G131100	chr3D	632636214	632637573	1	1
T4050359	TraesCSU02G131200	chr3D	632638378	632639873	1	1
T4050360	TraesCSU02G131300	chr3D	632663878	632670579	1	1
T4050372	TraesCSU02G058438	chr3D	633855327	633857783	0.995489	0.932832
T4050374	TraesCSU02G058400	chr3D	633885517	633886581	1	1
T4050375	TraesCSU02G058300	chr3D	633888879	633890415	1	1
T4050376	TraesCSU02G058200	chr3D	633895325	633898208	1	1
T4050377	TraesCSU02G058100	chr3D	633898256	633901522	1	1
T4050378	TraesCSU02G058000	chr3D	633901888	633911223	1	1
T4050450	TraesCSU02G202600	chr3D	638168290	638169117	0.882353	0.817112
T4050453	TraesCSU02G146700	chr3D	638743939	638745270	1	0.992101
T4050498	TraesCSU02G019000	chr3D	642136592	642137622	1	1
T4050499	TraesCSU02G018900	chr3D	642140821	642141573	1	1
T4050603	TraesCSU02G058600	chr3D	649031735	649032109	1	1
T4050604	TraesCSU02G058700	chr3D	649048697	649049416	1	1
T4050605	TraesCSU02G058800	chr3D	649062624	649063004	1	1
T4050606	TraesCSU02G058900	chr3D	649073140	649074439	1	1
T4050607	TraesCSU02G059000	chr3D	649076689	649078183	1	1
T4050608	TraesCSU02G059100	chr3D	649080011	649081521	1	1
T4050609	TraesCSU02G059200	chr3D	649089516	649097282	1	1
T4050610	TraesCSU02G059300	chr3D	649099650	649104933	1	1
T4050611	TraesCSU02G059400	chr3D	649106466	649115867	1	1
T4050612	TraesCSU02G059500	chr3D	649126188	649132599	1	1
T4050614	TraesCSU02G173000	chr3D	649150403	649153833	0.999499	0.999499
T4050615	TraesCSU02G059600	chr3D	649178035	649179857	1	1
T4051123	TraesCSU02G256300	chr4A	25901922	25902450	1	1
T4051124	TraesCSU02G229500	chr4A	25905805	25906333	1	1
T4051152	TraesCSU02G237400	chr4A	27676221	27676625	1	1
T4051153	TraesCSU02G166500	chr4A	27721347	27721751	1	1
T4051569	TraesCSU02G106600	chr4A	78551048	78551312	1	0.996212
T4052324	TraesCSU02G247400	chr4A	310811068	310811991	1	0.996753
T4052325	TraesCSU02G159500	chr4A	310814018	310814272	1	0.992157
T4052347	TraesCSU02G251400	chr4A	325114977	325115390	1	0.997585
T4052462	TraesCSU02G182700	chr4A	392749147	392751713	0.979003	0.928259
T4052703	TraesCSU02G059700	chr4A	489171963	489173269	1	1
T4052704	TraesCSU02G261400	chr4A	489179305	489180367	1	1
T4052705	TraesCSU02G191800	chr4A	489188532	489189350	1	1
T4053580	TraesCSU02G150500	chr4A	614024229	614027134	1	1
T4053656	TraesCSU02G253700	chr4A	619826072	619826576	1	1
T4053661	TraesCSU02G241400	chr4A	620105724	620106194	1	1
T4053662	TraesCSU02G207500	chr4A	620115707	620119213	0.996479	0.991393
T4053807	TraesCSU02G060100	chr4A	626077956	626080881	1	1
T4053808	TraesCSU02G214800	chr4A	626092036	626094642	1	1
T4053810	TraesCSU02G060200	chr4A	626133994	626136713	0.858824	0.858824
T4053811	TraesCSU02G060000	chr4A	626144811	626147690	1	1
T4053814	TraesCSU02G197100	chr4A	626246587	626249141	1	1
T4053819	TraesCSU02G241200	chr4A	626510873	626511898	1	1
T4053825	TraesCSU02G157700	chr4A	626832753	626835437	1	0.937861
T4053837	TraesCSU02G199300	chr4A	627286289	627288193	1	0.999395
T4053838	TraesCSU02G060300	chr4A	627313992	627316750	1	1
T4053937	TraesCSU02G061800	chr4A	633632966	633636054	1	0.99962
T4054193	TraesCSU02G216700	chr4A	652762116	652765303	0.998938	0.998938
T4054235	TraesCSU02G062100	chr4A	655649499	655652774	1	1
T4054390	TraesCSU02G255500	chr4A	665868429	665869019	1	1
T4054497	TraesCSU02G192200	chr4A	675919163	675919423	1	1
T4054504	TraesCSU02G063200	chr4A	676665275	676665889	1	1
T4054505	TraesCSU02G063300	chr4A	676734657	676735165	1	1
T4054590	TraesCSU02G062400	chr4A	693155917	693156911	1	1
T4054591	TraesCSU02G062500	chr4A	693160820	693161260	1	1
T4054592	TraesCSU02G255900	chr4A	693219121	693219692	1	1
T4054594	TraesCSU02G268700	chr4A	693245763	693246798	1	0.998198
T4054595	TraesCSU02G240600	chr4A	693279170	693279741	1	0.996491
T4054596	TraesCSU02G223800	chr4A	693281688	693283021	1	1
T4054664	TraesCSU02G175800	chr4A	699789831	699791904	1	1
T4054666	TraesCSU02G063100	chr4A	699834395	699836228	1	1
T4054667	TraesCSU02G063000	chr4A	699890372	699891809	1	1
T4054674	TraesCSU02G152300	chr4A	700361518	700362030	1	1
T4054675	TraesCSU02G152200	chr4A	700384437	700384949	1	1
T4054739	TraesCSU02G258300	chr4A	706579725	706580143	1	0.99705
T4054765	TraesCSU02G201400	chr4A	707795944	707796650	1	1
T4054766	TraesCSU02G237600	chr4A	707797361	707798136	1	1
T4054767	TraesCSU02G199000	chr4A	707817337	707819702	1	0.998689
T4054774	TraesCSU02G250800	chr4A	708386779	708387927	1	0.995224
T4054775	TraesCSU02G062800	chr4A	708563467	708563850	1	1
T4054776	TraesCSU02G062700	chr4A	708580599	708581693	1	0.998993
T4054777	TraesCSU02G250900	chr4A	708580919	708581302	1	1
T4054800	TraesCSU02G252500	chr4A	711231030	711232432	1	1
T4054803	TraesCSU02G246200	chr4A	711311782	711312948	1	1
T4055003	TraesCSU02G063500	chr4A	727213672	727217246	0.942955	0.942955
T4055004	TraesCSU02G063400	chr4A	727236652	727240253	1	1
T4055027	TraesCSU02G153200	chr4A	730665744	730667723	1	1
T4055075	TraesCSU02G200000	chr4A	736946550	736948800	1	1
T4055159	TraesCSU02G063900	chr4A	745569576	745570559	1	1
T4055175	TraesCSU02G063600	chr4A	746943649	746946315	1	1
T4055177	TraesCSU02G064000	chr4A	747179086	747180321	0.513975	0.513975
T4055178	TraesCSU02G211500	chr4A	747202954	747206015	1	1
T4055214	TraesCSU02G158400	chr4A	750079778	750081107	1	1
T4055230	TraesCSU02G063800	chr4A	751627918	751629549	1	1
T4055231	TraesCSU02G221800	chr4A	751641418	751643846	1	1
T4055248	TraesCSU02G220700	chr4A	752237412	752238972	0.535218	0.534769
T4055287	TraesCSU02G255400	chr4A	756350161	756350902	1	1
T4055317	TraesCSU02G065300	chr4A	757864826	757873036	1	1
T4055318	TraesCSU02G065200	chr4A	757874845	757877126	1	1
T4055319	TraesCSU02G064700	chr4A	758107357	758111896	1	1
T4055320	TraesCSU02G064800	chr4A	758114961	758116525	1	1
T4055321	TraesCSU02G064900	chr4A	758116875	758121150	1	1
T4055322	TraesCSU02G065000	chr4A	758136123	758136779	1	1
T4055323	TraesCSU02G065100	chr4A	758145684	758149377	1	1
T4055325	TraesCSU02G209500	chr4A	758260466	758260939	1	1
T4055326	TraesCSU02G209400	chr4A	758322770	758323165	1	1
T4055341	TraesCSU02G064300	chr4A	758755592	758757589	0.974768	0.974768
T4055342	TraesCSU02G064200	chr4A	758794162	758799567	0.963174	0.963174
T4055343	TraesCSU02G184200	chr4A	759100653	759102929	1	1
T4055344	TraesCSU02G230700	chr4A	759290872	759292460	1	1
T4055347	TraesCSU02G178200	chr4A	759396732	759397838	1	1
T4055445	TraesCSU02G207400	chr4A	768117423	768119704	1	1
T4055516	TraesCSU02G256800	chr4A	774003384	774004042	1	1
T4055517	TraesCSU02G066100	chr4A	774016960	774018940	1	1
T4055578	TraesCSU02G230100	chr4A	777780934	777781983	1	1
T4055616	TraesCSU02G066000	chr4A	780554981	780558487	1	1
T4055617	TraesCSU02G065600	chr4A	780561194	780562154	1	1
T4055620	TraesCSU02G065800	chr4A	780570859	780573027	0.819512	0.819512
T4055621	TraesCSU02G065900	chr4A	780572468	780572656	1	1
T4055709	TraesCSU02G226600	chr4A	785511832	785513301	1	1
T4055814	TraesCSU02G022300	chr4A	789462126	789466138	1	1
T4055816	TraesCSU02G194100	chr4A	789499466	789502664	1	0.999671
T4055826	TraesCSU02G066200	chr4A	790143792	790147902	1	1
T4055828	TraesCSU02G219800	chr4A	790314509	790315269	1	1
T4055829	TraesCSU02G066400	chr4A	790331498	790339442	0.960707	0.960707
T4055830	TraesCSU02G066300	chr4A	790347503	790360787	1	1
T4055831	TraesCSU02G233400	chr4A	790369519	790370358	1	1
T4055832	TraesCSU02G193300	chr4A	790420010	790420734	1	1
T4055896	TraesCSU02G176100	chr4A	792784261	792785443	1	1
T4055897	TraesCSU02G191900	chr4A	792853481	792856035	1	1
T4055915	TraesCSU02G066600	chr4A	793939995	793940760	1	0.998276
T4055964	TraesCSU02G060400	chr4B	2953553	2957185	1	1
T4055965	TraesCSU02G060500	chr4B	2980539	2983098	1	1
T4055966	TraesCSU02G060600	chr4B	3035103	3047879	1	1
T4055967	TraesCSU02G060700	chr4B	3048012	3050904	1	1
T4055968	TraesCSU02G060800	chr4B	3128815	3130243	1	1
T4055969	TraesCSU02G060900	chr4B	3214674	3218142	1	1
T4055970	TraesCSU02G061500	chr4B	3222434	3222865	1	1
T4055972	TraesCSU02G193700	chr4B	3484677	3487642	0.986624	0.954777
T4055982	TraesCSU02G061700	chr4B	4340129	4344525	1	1
T4055983	TraesCSU02G061600	chr4B	4436672	4437290	1	1
T4055984	TraesCSU02G061000	chr4B	4514395	4514826	1	1
T4055985	TraesCSU02G061400	chr4B	4521970	4522410	1	1
T4055986	TraesCSU02G061300	chr4B	4530512	4531265	1	1
T4055992	TraesCSU02G066800	chr4B	5060543	5063716	1	1
T4055993	TraesCSU02G066900	chr4B	5069542	5070734	1	1
T4056004	TraesCSU02G241900	chr4B	5842131	5842697	1	1
T4056027	TraesCSU02G070300	chr4B	7180057	7180707	0.986111	0.834877
T4056030	TraesCSU02G070600	chr4B	7191092	7191727	1	0.947867
T4056048	TraesCSU02G166100	chr4B	8208755	8210581	1	1
T4056050	TraesCSU02G166000	chr4B	8218658	8220654	1	1
T4056051	TraesCSU02G066700	chr4B	8222833	8230552	1	1
T4056218	TraesCSU02G067700	chr4B	20841598	20843454	1	1
T4056226	TraesCSU02G231200	chr4B	21813354	21813719	1	1
T4056227	TraesCSU02G143500	chr4B	22069649	22070014	1	1
T4056230	TraesCSU02G250100	chr4B	22238416	22239949	0.997373	0.995622
T4056341	TraesCSU02G250200	chr4B	30572457	30573406	1	1
T4056384	TraesCSU02G184400	chr4B	33235286	33237188	1	1
T4056385	TraesCSU02G184300	chr4B	33280691	33281327	1	1
T4056526	TraesCSU02G248300	chr4B	49947610	49948193	1	1
T4056867	TraesCSU02G267100	chr4B	100215562	100215738	1	1
T4057120	TraesCSU02G187100	chr4B	142929880	142934337	1	1
T4057121	TraesCSU02G068400	chr4B	142941035	142941748	1	1
T4057362	TraesCSU02G054700	chr4B	197699403	197704601	1	1
T4057363	TraesCSU02G054600	chr4B	197705465	197707195	1	1
T4057364	TraesCSU02G054500	chr4B	197708525	197712421	1	1
T4057365	TraesCSU02G054300	chr4B	197859003	197864268	0.999169	0.999169
T4057366	TraesCSU02G054400	chr4B	197898228	197898931	1	1
T4057399	TraesCSU02G175000	chr4B	213333438	213337261	1	1
T4057400	TraesCSU02G067600	chr4B	213672448	213675621	1	1
T4057401	TraesCSU02G067400	chr4B	215574639	215586138	1	1
T4057405	TraesCSU02G067300	chr4B	218105250	218109097	1	1
T4057407	TraesCSU02G068800	chr4B	219656096	219661254	1	1
T4057472	TraesCSU02G067200	chr4B	253074148	253074888	1	1
T4057544	TraesCSU02G197500	chr4B	319658016	319662005	1	1
T4057545	TraesCSU02G068300	chr4B	319669792	319682561	1	1
T4057546	TraesCSU02G186200	chr4B	319896544	319896956	1	1
T4058178	TraesCSU02G069200	chr4B	484459918	484461647	1	1
T4058483	TraesCSU02G254800	chr4B	541462075	541462761	1	1
T4058699	TraesCSU02G198200	chr4B	575588600	575590097	0.995157	0.953188
T4058967	TraesCSU02G234900	chr4B	615208684	615210085	1	1
T4058971	TraesCSU02G242300	chr4B	615414165	615415702	0.991944	0.990937
T4058989	TraesCSU02G266200	chr4B	618020828	618021944	0.910777	0.910777
T4059072	TraesCSU02G115400	chr4B	629995720	630004217	0.853473	0.816488
T4059287	TraesCSU02G069400	chr4B	654043510	654045460	1	1
T4059288	TraesCSU02G069300	chr4B	654074038	654075990	0.915958	0.915958
T4059317	TraesCSU02G124300	chr4B	657640427	657641398	0.627674	0.573529
T4059384	TraesCSU02G188300	chr4B	666862219	666862766	0.998168	0.899267
T4059482	TraesCSU02G069600	chr4B	675842481	675846324	0.998662	0.975114
T4059576	TraesCSU02G069800	chr4B	682933280	682934092	1	1
T4059579	TraesCSU02G236000	chr4B	683066623	683067437	1	1
T4059580	TraesCSU02G236900	chr4B	683134623	683136694	1	0.999436
T4059686	TraesCSU02G070100	chr4B	689125928	689126485	1	1
T4059696	TraesCSU02G261300	chr4B	689892304	689892717	1	0.992754
T4059697	TraesCSU02G261600	chr4B	689926792	689927464	1	0.992571
T4059698	TraesCSU02G261307	chr4B	689959239	689959652	0.997585	0.990338
T4059700	TraesCSU02G070000	chr4B	689989667	689990080	1	0.987923
T4059761	TraesCSU02G128200	chr4B	694151833	694152882	1	0.998819
T4059762	TraesCSU02G128300	chr4B	694162188	694162628	1	0.993197
T4059763	TraesCSU02G128400	chr4B	694167473	694168475	1	0.996528
T4059764	TraesCSU02G128500	chr4B	694190091	694191125	1	1
T4059765	TraesCSU02G128600	chr4B	694195692	694196584	1	1
T4059766	TraesCSU02G128700	chr4B	694201388	694201924	1	1
T4059782	TraesCSU02G256400	chr4B	694581101	694581541	1	0.997732
T4059788	TraesCSU02G129300	chr4B	694666692	694669756	0.945807	0.913292
T4059792	TraesCSU02G130700	chr4B	694735641	694736274	0.640884	0.605893
T4059867	TraesCSU02G125400	chr4B	700121173	700121881	1	0.954802
T4059874	TraesCSU02G123900	chr4B	700205128	700206324	0.877519	0.710853
T4060061	TraesCSU02G127600	chr4D	4377139	4377753	1	1
T4060430	TraesCSU02G268800	chr4D	23075004	23075132	1	1
T4060431	TraesCSU02G268900	chr4D	23075533	23075785	1	1
T4060433	TraesCSU02G269200	chr4D	23081027	23081158	1	0.992424
T4060435	TraesCSU02G269500	chr4D	23083746	23084528	1	0.997446
T4060436	TraesCSU02G259800	chr4D	23085717	23086148	1	0.997685
T4060439	TraesCSU02G246600	chr4D	23091211	23091708	1	0.995984
T4060441	TraesCSU02G268300	chr4D	23092556	23092717	1	1
T4060492	TraesCSU02G106900	chr4D	29146045	29152288	1	1
T4060511	TraesCSU02G070700	chr4D	30665185	30666154	1	1
T4061069	TraesCSU02G214700	chr4D	95503363	95505668	1	1
T4061397	TraesCSU02G177800	chr4D	134480045	134481118	1	0.997207
T4061403	TraesCSU02G270900	chr4D	134529260	134529514	1	0.992157
T4061423	TraesCSU02G181000	chr4D	139495097	139500505	1	0.98166
T4061425	TraesCSU02G069000	chr4D	140507115	140508698	0.958166	0.953339
T4061525	TraesCSU02G077400	chr4D	180035414	180036177	1	1
T4061526	TraesCSU02G077300	chr4D	180104307	180106258	1	1
T4061527	TraesCSU02G077200	chr4D	180116852	180117468	1	1
T4061528	TraesCSU02G077100	chr4D	180156980	180159936	1	1
T4061529	TraesCSU02G077000	chr4D	180282270	180284524	1	1
T4061605	TraesCSU02G016600	chr4D	231190805	231192211	1	1
T4062084	TraesCSU02G018400	chr4D	373535269	373536648	1	1
T4062259	TraesCSU02G161900	chr4D	399618889	399620287	1	0.97151
T4062371	TraesCSU02G267800	chr4D	416086646	416086942	1	1
T4062398	TraesCSU02G154108	chr4D	418670349	418670771	1	1
T4062399	TraesCSU02G154109	chr4D	418673724	418674095	1	1
T4062400	TraesCSU02G154100	chr4D	418677109	418677498	1	1
T4062401	TraesCSU02G154112	chr4D	418691926	418692297	1	1
T4062402	TraesCSU02G185500	chr4D	418712163	418712552	1	0.997436
T4063050	TraesCSU02G020700	chr4D	497619070	497620104	1	1
T4063142	TraesCSU02G148600	chr4D	506643908	506644946	1	1
T4063143	TraesCSU02G148500	chr4D	506653814	506654423	1	1
T4063156	TraesCSU02G261200	chr4D	507695016	507695429	1	1
T4063186	TraesCSU02G048100	chr4D	509632737	509633139	0.531746	0.478836
T4063191	TraesCSU02G070800	chr4D	509846881	509848458	1	1
T4063257	TraesCSU02G257400	chr4D	513960102	513960458	1	0.997199
T4063258	TraesCSU02G150100	chr4D	513960503	513960880	1	0.997354
T4063561	TraesCSU02G141200	chr4D	535355324	535357224	1	1
T4063562	TraesCSU02G141300	chr4D	535442269	535443023	1	1
T4063564	TraesCSU02G141100	chr4D	535501915	535502419	1	1
T4063565	TraesCSU02G141000	chr4D	535505208	535507042	1	1
T4063566	TraesCSU02G140900	chr4D	535523607	535526538	1	1
T4063567	TraesCSU02G140800	chr4D	535528214	535528624	1	1
T4063569	TraesCSU02G140600	chr4D	535566940	535572252	1	1
T4063570	TraesCSU02G140500	chr4D	535579736	535584856	1	1
T4063571	TraesCSU02G140400	chr4D	535588710	535591714	0.977162	0.953779
T4063572	TraesCSU02G140300	chr4D	535595262	535599191	1	1
T4063688	TraesCSU02G127700	chr4D	540995093	540999216	1	1
T4063690	TraesCSU02G194000	chr4D	541078247	541078606	1	1
T4063691	TraesCSU02G144263	chr4D	541085532	541085891	1	1
T4063694	TraesCSU02G144459	chr4D	541117020	541117409	1	1
T4063695	TraesCSU02G144500	chr4D	541135521	541135952	1	1
T4063696	TraesCSU02G144600	chr4D	541149765	541150229	1	1
T4063697	TraesCSU02G144700	chr4D	541165617	541166048	1	1
T4063698	TraesCSU02G144800	chr4D	541177748	541178266	1	1
T4063766	TraesCSU02G152900	chr4D	544036211	544036846	1	1
T4063767	TraesCSU02G152800	chr4D	544050020	544050460	1	1
T4063768	TraesCSU02G161300	chr4D	544134888	544135328	1	1
T4063769	TraesCSU02G145700	chr4D	544151842	544152903	1	1
T4063770	TraesCSU02G145600	chr4D	544160756	544161349	1	1
T4063773	TraesCSU02G145300	chr4D	544257773	544258832	1	1
T4063793	TraesCSU02G209900	chr5A	1444769	1445357	1	1
T4063903	TraesCSU02G083900	chr5A	10360884	10363377	0.831097	0.831097
T4063904	TraesCSU02G213400	chr5A	10369115	10370096	1	1
T4063913	TraesCSU02G171100	chr5A	10591267	10591740	1	1
T4063914	TraesCSU02G171000	chr5A	10595635	10596108	1	1
T4064097	TraesCSU02G245900	chr5A	31910808	31911687	1	0.996154
T4064108	TraesCSU02G182800	chr5A	33754192	33757428	1	1
T4064187	TraesCSU02G120100	chr5A	41023149	41024631	1	1
T4064188	TraesCSU02G120000	chr5A	41030533	41031771	1	1
T4064189	TraesCSU02G119900	chr5A	41043618	41048225	1	1
T4064190	TraesCSU02G119800	chr5A	41054253	41055478	1	1
T4064967	TraesCSU02G229100	chr5A	253168279	253168872	1	0.978114
T4065354	TraesCSU02G086000	chr5A	352556527	352558920	1	1
T4065686	TraesCSU02G045200	chr5A	413255239	413256401	0.644522	0.541958
T4066062	TraesCSU02G191600	chr5A	468084518	468086291	0.941242	0.941242
T4067198	TraesCSU02G072200	chr5A	580449588	580452737	1	1
T4067199	TraesCSU02G221300	chr5A	580475260	580477045	1	1
T4067204	TraesCSU02G072300	chr5A	580587724	580588974	1	1
T4067317	TraesCSU02G201700	chr5A	587293325	587294659	1	1
T4067318	TraesCSU02G201800	chr5A	587295269	587295985	1	1
T4067319	TraesCSU02G215900	chr5A	587299819	587301081	1	1
T4067320	TraesCSU02G072400	chr5A	587357898	587359780	1	0.999425
T4067321	TraesCSU02G072500	chr5A	587360390	587366201	1	1
T4067379	TraesCSU02G174200	chr5A	593959112	593959375	1	0.992424
T4067380	TraesCSU02G174300	chr5A	593960940	593961185	1	0.99187
T4067381	TraesCSU02G263500	chr5A	593961850	593962023	1	0.994253
T4067441	TraesCSU02G230300	chr5A	598468393	598469270	1	1
T4067568	TraesCSU02G072700	chr5A	609889067	609895590	0.943915	0.943354
T4067569	TraesCSU02G072800	chr5A	609904327	609906456	1	1
T4068041	TraesCSU02G072600	chr5A	645587040	645591364	0.863054	0.863054
T4068414	TraesCSU02G201100	chr5A	681595465	681599155	1	0.996444
T4068415	TraesCSU02G201200	chr5A	681711682	681715084	1	0.993276
T4068724	TraesCSU02G115500	chr5A	703013677	703015675	0.970142	0.946647
T4068857	TraesCSU02G248400	chr5A	711871407	711873030	1	0.998153
T4068962	TraesCSU02G073000	chr5A	721851304	721852806	1	1
T4069124	TraesCSU02G034600	chr5A	736472263	736473203	0.515436	0.471334
T4069155	TraesCSU02G255200	chr5A	738365370	738365922	1	1
T4069254	TraesCSU02G158600	chr5A	747824213	747827412	1	1
T4069284	TraesCSU02G184924	chr5A	749844449	749844889	1	1
T4069286	TraesCSU02G150700	chr5A	749858023	749858840	1	0.998551
T4069287	TraesCSU02G150800	chr5A	749866273	749866809	1	1
T4069291	TraesCSU02G150600	chr5A	750029551	750029991	1	0.995465
T4069295	TraesCSU02G222000	chr5A	750079132	750079944	1	1
T4069297	TraesCSU02G253400	chr5A	750143348	750144413	1	1
T4069299	TraesCSU02G238600	chr5A	750172694	750173134	1	1
T4069348	TraesCSU02G199200	chr5A	753836725	753838642	1	1
T4069349	TraesCSU02G192300	chr5A	753872499	753874314	1	1
T4069356	TraesCSU02G158300	chr5A	754370953	754372134	1	1
T4069370	TraesCSU02G126800	chr5A	755709275	755711616	0.955934	0.921466
T4069398	TraesCSU02G073100	chr5A	757359281	757359714	1	1
T4069420	TraesCSU02G194500	chr5A	758758999	758760883	1	1
T4069421	TraesCSU02G213900	chr5A	758771200	758771658	1	1
T4069422	TraesCSU02G035200	chr5A	758795038	758796506	0.937743	0.890402
T4069428	TraesCSU02G263900	chr5A	758916574	758917520	0.939484	0.933532
T4069471	TraesCSU02G073300	chr5B	2221609	2225747	1	1
T4069472	TraesCSU02G073400	chr5B	2226040	2231720	1	1
T4069475	TraesCSU02G158900	chr5B	2575453	2575776	1	1
T4069476	TraesCSU02G146400	chr5B	2659267	2659590	1	1
T4069477	TraesCSU02G270700	chr5B	3075121	3075681	1	1
T4069639	TraesCSU02G209100	chr5B	19499485	19500078	1	1
T4069644	TraesCSU02G210500	chr5B	19750154	19750594	1	1
T4069647	TraesCSU02G238500	chr5B	19995673	19996267	1	1
T4069743	TraesCSU02G215700	chr5B	30431867	30432712	1	1
T4069744	TraesCSU02G220900	chr5B	30462280	30462729	1	1
T4069745	TraesCSU02G230000	chr5B	30508959	30509435	1	1
T4069746	TraesCSU02G200100	chr5B	30514492	30514962	1	1
T4069747	TraesCSU02G203500	chr5B	30551135	30551599	1	1
T4069748	TraesCSU02G225800	chr5B	30642729	30643740	1	1
T4069750	TraesCSU02G176500	chr5B	30826377	30826784	1	1
T4069751	TraesCSU02G211400	chr5B	30908112	30908570	1	1
T4069752	TraesCSU02G186400	chr5B	30942273	30943115	1	1
T4069773	TraesCSU02G161100	chr5B	35764276	35764801	1	1
T4069774	TraesCSU02G180900	chr5B	35770184	35775684	1	1
T4069775	TraesCSU02G073500	chr5B	36196073	36196555	1	1
T4069832	TraesCSU02G073900	chr5B	42357356	42358930	1	1
T4069840	TraesCSU02G073600	chr5B	43185801	43186206	1	1
T4070026	TraesCSU02G174100	chr5B	64583748	64585019	0.997647	0.988235
T4070111	TraesCSU02G264300	chr5B	76547277	76547531	1	1
T4070112	TraesCSU02G074200	chr5B	76561012	76561383	1	1
T4070113	TraesCSU02G074100	chr5B	76577774	76579529	1	1
T4070116	TraesCSU02G228100	chr5B	76838932	76839186	1	1
T4070470	TraesCSU02G151700	chr5B	138267504	138268097	1	0.998316
T4070471	TraesCSU02G050200	chr5B	138309953	138310582	1	0.996825
T4070652	TraesCSU02G003100	chr5B	189741673	189742776	1	1
T4070691	TraesCSU02G136000	chr5B	210929234	210936569	1	1
T4070844	TraesCSU02G154400	chr5B	253171065	253172616	1	0.995117
T4071518	TraesCSU02G023400	chr5B	380016006	380019727	0.582988	0.551176
T4071567	TraesCSU02G073800	chr5B	387395466	387395692	1	1
T4071568	TraesCSU02G073700	chr5B	387418067	387418672	1	1
T4072164	TraesCSU02G181500	chr5B	467109477	467111064	1	1
T4072254	TraesCSU02G231300	chr5B	480991522	480991938	1	1
T4072256	TraesCSU02G235000	chr5B	481020517	481020936	1	0.997619
T4072257	TraesCSU02G074500	chr5B	481025051	481025344	1	1
T4072258	TraesCSU02G240800	chr5B	481028120	481028623	1	1
T4072259	TraesCSU02G148400	chr5B	481057545	481057964	1	1
T4072260	TraesCSU02G148300	chr5B	481066606	481070137	1	1
T4072261	TraesCSU02G148200	chr5B	481074702	481080810	1	1
T4072262	TraesCSU02G074400	chr5B	481085474	481085752	0.664286	0.640476
T4072263	TraesCSU02G148100	chr5B	481094555	481102624	1	1
T4072905	TraesCSU02G239400	chr5B	545456768	545458452	1	1
T4072906	TraesCSU02G204400	chr5B	545493201	545494885	1	1
T4073022	TraesCSU02G030000	chr5B	556932468	556933803	0.750707	0.686829
T4073041	TraesCSU02G185100	chr5B	559378909	559379808	1	1
T4073330	TraesCSU02G088000	chr5B	582143741	582144270	1	0.998113
T4073456	TraesCSU02G111800	chr5B	594081166	594085201	1	1
T4073457	TraesCSU02G111700	chr5B	594086029	594089782	1	1
T4073458	TraesCSU02G111600	chr5B	594092966	594095441	1	1
T4073459	TraesCSU02G111500	chr5B	594096116	594099521	1	1
T4073460	TraesCSU02G111400	chr5B	594102275	594112171	1	1
T4073461	TraesCSU02G111300	chr5B	594113692	594116572	1	1
T4073462	TraesCSU02G111200	chr5B	594252374	594254198	1	1
T4073529	TraesCSU02G232200	chr5B	604593931	604594306	1	1
T4073533	TraesCSU02G074700	chr5B	604870008	604870730	1	1
T4073534	TraesCSU02G206800	chr5B	604877961	604878353	1	1
T4073541	TraesCSU02G198000	chr5B	605577955	605578731	1	1
T4073953	TraesCSU02G248700	chr5B	646743218	646743829	1	0.99183
T4074430	TraesCSU02G074800	chr5B	694863592	694864592	1	1
T4074432	TraesCSU02G197000	chr5B	694915268	694916267	0.977451	0.907843
T4074435	TraesCSU02G209700	chr5B	695030694	695031627	1	1
T4074524	TraesCSU02G253600	chr5B	700610394	700611206	1	1
T4074757	TraesCSU02G075400	chr5B	721241440	721243699	1	1
T4074758	TraesCSU02G075300	chr5B	721249599	721252282	0.912228	0.912228
T4074761	TraesCSU02G158100	chr5B	721267678	721268228	0.994585	0.98556
T4074806	TraesCSU02G075200	chr5B	724286940	724288521	0.98982	0.98982
T4074807	TraesCSU02G075100	chr5B	724302819	724305039	1	1
T4074880	TraesCSU02G194400	chr5B	728340771	728342190	0.857627	0.857627
T4075364	TraesCSU02G272900	chr5D	151337	151695	1	0.972145
T4075454	TraesCSU02G258700	chr5D	6747768	6747863	1	1
T4075456	TraesCSU02G259300	chr5D	6749424	6749540	1	0.991453
T4075457	TraesCSU02G231000	chr5D	6756139	6756890	0.715509	0.692674
T4075461	TraesCSU02G266900	chr5D	6766530	6767178	0.998168	0.994505
T4075471	TraesCSU02G259700	chr5D	6791670	6791885	1	0.99537
T4075476	TraesCSU02G214000	chr5D	6802697	6802897	1	0.99005
T4075482	TraesCSU02G259200	chr5D	6806014	6806133	1	1
T4075484	TraesCSU02G270600	chr5D	6806377	6806520	1	0.993056
T4075595	TraesCSU02G170900	chr5D	14536219	14536691	0.997763	0.975391
T4075599	TraesCSU02G005700	chr5D	14982270	14983283	1	1
T4075600	TraesCSU02G005600	chr5D	14999557	15001110	1	1
T4075641	TraesCSU02G269900	chr5D	22000935	22001312	1	0.992063
T4075642	TraesCSU02G249800	chr5D	22002556	22003421	1	0.995381
T4075644	TraesCSU02G101400	chr5D	23215390	23217304	1	1
T4075679	TraesCSU02G120900	chr5D	30062917	30065920	1	1
T4075681	TraesCSU02G120700	chr5D	30195907	30196917	1	1
T4075682	TraesCSU02G120600	chr5D	30220427	30220954	1	1
T4075683	TraesCSU02G120500	chr5D	30224717	30225269	1	1
T4075684	TraesCSU02G120400	chr5D	30262294	30264066	1	1
T4075685	TraesCSU02G120300	chr5D	30279135	30281325	1	1
T4075686	TraesCSU02G120200	chr5D	30340802	30342954	1	1
T4075865	TraesCSU02G120800	chr5D	49010167	49015130	1	1
T4075946	TraesCSU02G271800	chr5D	56599189	56599984	0.868313	0.868313
T4076078	TraesCSU02G228000	chr5D	69925158	69925403	0.964706	0.843137
T4076111	TraesCSU02G122800	chr5D	74486794	74488728	0.990937	0.947885
T4076377	TraesCSU02G205500	chr5D	119925154	119926489	0.990741	0.970899
T4076497	TraesCSU02G024600	chr5D	134174632	134175363	1	0.986891
T4076554	TraesCSU02G104900	chr5D	141181076	141186768	1	1
T4076556	TraesCSU02G098000	chr5D	141295755	141296816	0.980609	0.960295
T4076587	TraesCSU02G035500	chr5D	145162576	145165355	1	1
T4076588	TraesCSU02G035700	chr5D	145346726	145348969	1	1
T4076664	TraesCSU02G195400	chr5D	186518783	186519395	1	1
T4076727	TraesCSU02G134600	chr5D	212501434	212517432	1	1
T4076728	TraesCSU02G134800	chr5D	212810870	212820055	1	0.999372
T4076824	TraesCSU02G205700	chr5D	238689374	238690636	1	1
T4076825	TraesCSU02G075900	chr5D	238726451	238727908	1	1
T4076992	TraesCSU02G214100	chr5D	267509302	267509430	1	0.992248
T4077301	TraesCSU02G138300	chr5D	314446511	314453148	1	1
T4077302	TraesCSU02G138400	chr5D	314548380	314557490	1	1
T4077303	TraesCSU02G138500	chr5D	314579064	314582874	1	1
T4077304	TraesCSU02G138600	chr5D	314583420	314589201	1	1
T4077305	TraesCSU02G138700	chr5D	314591818	314595203	1	1
T4077306	TraesCSU02G138800	chr5D	314599946	314604394	1	1
T4077307	TraesCSU02G138900	chr5D	314614616	314622758	1	1
T4077308	TraesCSU02G139000	chr5D	314626578	314628512	1	1
T4077309	TraesCSU02G139100	chr5D	314633198	314635310	1	1
T4077310	TraesCSU02G139200	chr5D	314663378	314664422	1	1
T4077311	TraesCSU02G139300	chr5D	314665618	314669343	1	1
T4077312	TraesCSU02G139400	chr5D	314676577	314680504	1	1
T4077351	TraesCSU02G122300	chr5D	319046568	319047770	1	1
T4077352	TraesCSU02G122200	chr5D	319057544	319058670	1	1
T4077353	TraesCSU02G122100	chr5D	319082738	319084448	1	1
T4077354	TraesCSU02G122000	chr5D	319087526	319090429	1	1
T4077472	TraesCSU02G077500	chr5D	332159304	332159693	1	1
T4077698	TraesCSU02G035400	chr5D	363265773	363265904	1	1
T4077699	TraesCSU02G269100	chr5D	363266008	363266229	1	1
T4078330	TraesCSU02G110800	chr5D	423466518	423475142	1	1
T4078331	TraesCSU02G111000	chr5D	423523055	423532438	1	1
T4078833	TraesCSU02G179300	chr5D	464031239	464035697	1	1
T4079304	TraesCSU02G076800	chr5D	492522363	492523670	1	1
T4079471	TraesCSU02G115000	chr5D	506319050	506320864	1	1
T4079472	TraesCSU02G115100	chr5D	506324655	506325869	1	1
T4079517	TraesCSU02G208600	chr5D	509876643	509877083	0.835227	0.808712
T4079596	TraesCSU02G035250	chr5D	516346856	516353858	1	1
T4079779	TraesCSU02G271100	chr5D	530327973	530328218	1	1
T4079822	TraesCSU02G014900	chr5D	532947462	532948223	1	1
T4079912	TraesCSU02G076500	chr5D	539682696	539696507	0.961327	0.960641
T4079913	TraesCSU02G076400	chr5D	539766637	539767602	1	1
T4079914	TraesCSU02G076300	chr5D	539771109	539773437	1	1
T4079915	TraesCSU02G076200	chr5D	539773651	539775959	0.66531	0.66531
T4079991	TraesCSU02G229000	chr5D	544394243	544394812	1	1
T4079995	TraesCSU02G224000	chr5D	544416615	544417226	1	1
T4080058	TraesCSU02G151939	chr5D	547666704	547667144	1	1
T4080059	TraesCSU02G172100	chr5D	547671902	547672971	1	1
T4080060	TraesCSU02G128000	chr5D	547677509	547678545	1	1
T4080071	TraesCSU02G233000	chr5D	548249642	548250148	1	1
T4080072	TraesCSU02G226400	chr5D	548257541	548258047	1	1
T4080073	TraesCSU02G202900	chr5D	548288161	548288667	1	1
T4080076	TraesCSU02G076600	chr5D	548676085	548676591	1	1
T4080182	TraesCSU02G270400	chr5D	555375585	555375839	1	1
T4080189	TraesCSU02G149800	chr5D	555394642	555395212	1	0.997849
T4080202	TraesCSU02G263400	chr5D	555454398	555455141	1	0.998656
T4080330	TraesCSU02G251300	chr5D	565099287	565099550	1	0.992424
T4080345	TraesCSU02G260000	chr5D	566059048	566059278	1	1
T4080346	TraesCSU02G091200	chr5D	566064594	566064824	1	1
T4080452	TraesCSU02G074900	chr5D	572896568	572897218	1	0.958333
T4080499	TraesCSU02G183400	chr5D	575464109	575465166	1	1
T4080503	TraesCSU02G183200	chr5D	575774162	575775219	1	1
T4080870	TraesCSU02G178800	chr5D	599997674	599998786	1	1
T4080918	TraesCSU02G180500	chr5D	602414351	602415483	0.720874	0.606796
T4081158	TraesCSU02G261500	chr5D	615723740	615723997	1	1
T4081173	TraesCSU02G270000	chr5D	616138465	616138710	1	1
T4081351	TraesCSU02G078400	chr6A	135042	137154	1	1
T4081419	TraesCSU02G078500	chr6A	3155442	3157742	1	1
T4081451	TraesCSU02G232900	chr6A	4925561	4926610	1	0.998095
T4081454	TraesCSU02G071700	chr6A	5219487	5221995	1	1
T4081455	TraesCSU02G071500	chr6A	5257922	5259467	1	1
T4081456	TraesCSU02G071400	chr6A	5268142	5274519	1	1
T4081655	TraesCSU02G207200	chr6A	17080006	17081256	1	1
T4081656	TraesCSU02G079900	chr6A	17122796	17123758	1	0.988577
T4081657	TraesCSU02G212700	chr6A	17161554	17162804	0.998401	0.990408
T4081658	TraesCSU02G080000	chr6A	17195957	17211627	1	0.991736
T4081659	TraesCSU02G220100	chr6A	17240724	17241976	1	1
T4081661	TraesCSU02G224100	chr6A	17429108	17431122	1	1
T4081662	TraesCSU02G159900	chr6A	17452894	17456022	1	1
T4081663	TraesCSU02G171400	chr6A	17457871	17460440	1	0.999479
T4081664	TraesCSU02G173400	chr6A	17469476	17473673	1	1
T4081708	TraesCSU02G216000	chr6A	19932319	19932785	1	1
T4081760	TraesCSU02G194300	chr6A	22404138	22406025	1	1
T4081761	TraesCSU02G219500	chr6A	22409265	22411531	1	1
T4081762	TraesCSU02G217900	chr6A	22516329	22517654	0.952904	0.916797
T4081763	TraesCSU02G220000	chr6A	22568708	22569996	1	1
T4081764	TraesCSU02G078800	chr6A	22615678	22622646	1	1
T4081765	TraesCSU02G079000	chr6A	22695398	22697263	1	1
T4081766	TraesCSU02G078900	chr6A	22703027	22704695	1	1
T4081767	TraesCSU02G078700	chr6A	22717123	22717563	1	1
T4081768	TraesCSU02G078600	chr6A	22718766	22720673	1	1
T4081769	TraesCSU02G235600	chr6A	22721214	22723144	1	1
T4081833	TraesCSU02G264400	chr6A	27703382	27704058	1	0.99596
T4081844	TraesCSU02G184100	chr6A	28192727	28195490	1	1
T4081845	TraesCSU02G189100	chr6A	28198077	28198922	1	1
T4081883	TraesCSU02G160200	chr6A	29860063	29860959	1	1
T4081944	TraesCSU02G121000	chr6A	33901596	33902198	0.973776	0.938811
T4081978	TraesCSU02G142000	chr6A	36475583	36478724	0.991182	0.950617
T4082029	TraesCSU02G153800	chr6A	40272378	40273262	1	1
T4082050	TraesCSU02G118400	chr6A	41130171	41131177	1	1
T4082056	TraesCSU02G118800	chr6A	41184849	41186148	1	1
T4082161	TraesCSU02G080100	chr6A	52606187	52606438	1	1
T4082242	TraesCSU02G134000	chr6A	58981808	58983119	0.76533	0.737618
T4082307	TraesCSU02G018200	chr6A	65627075	65632510	0.689989	0.680887
T4082308	TraesCSU02G018300	chr6A	65664875	65666943	1	1
T4082404	TraesCSU02G183700	chr6A	75649641	75650791	1	1
T4082764	TraesCSU02G224600	chr6A	119889379	119891543	1	1
T4083423	TraesCSU02G211700	chr6A	308475515	308476345	0.72434	0.714565
T4083425	TraesCSU02G211800	chr6A	308748862	308749932	1	0.988787
T4083437	TraesCSU02G139800	chr6A	316670608	316671105	1	1
T4083438	TraesCSU02G139700	chr6A	316779137	316786791	1	1
T4083538	TraesCSU02G136200	chr6A	395451696	395454548	1	1
T4084880	TraesCSU02G081200	chr6A	615571332	615579542	1	0.991028
T4085361	TraesCSU02G160700	chr6A	647509030	647510742	1	1
T4085362	TraesCSU02G081300	chr6A	647511411	647517325	1	1
T4085363	TraesCSU02G081400	chr6A	647560008	647561629	1	1
T4085364	TraesCSU02G160800	chr6A	647562348	647568211	1	1
T4085369	TraesCSU02G208700	chr6A	648010378	648011131	1	1
T4085383	TraesCSU02G009200	chr6A	648645529	648649720	1	1
T4085478	TraesCSU02G186500	chr6A	651909438	651910340	1	1
T4085479	TraesCSU02G081500	chr6A	651916617	651918242	1	1
T4085480	TraesCSU02G171900	chr6A	651943121	651945599	1	1
T4085481	TraesCSU02G083700	chr6A	651958310	651960302	1	1
T4085483	TraesCSU02G081600	chr6A	652114470	652119657	1	1
T4085494	TraesCSU02G264000	chr6A	652618088	652618321	1	1
T4085564	TraesCSU02G082700	chr6A	655419425	655421157	1	1
T4085566	TraesCSU02G082900	chr6A	655439415	655448256	1	1
T4085567	TraesCSU02G083000	chr6A	655448347	655448901	1	1
T4085599	TraesCSU02G156800	chr6A	656252300	656256380	1	1
T4085602	TraesCSU02G083400	chr6A	656528204	656532735	1	1
T4085604	TraesCSU02G083200	chr6A	656558295	656561741	1	1
T4085605	TraesCSU02G083100	chr6A	656567276	656572751	1	1
T4085622	TraesCSU02G071200	chr6A	657257474	657260839	0.999462	0.996774
T4085623	TraesCSU02G071100	chr6A	657265011	657270173	1	1
T4085670	TraesCSU02G082600	chr6A	659110467	659110697	1	1
T4085671	TraesCSU02G082500	chr6A	659119912	659120142	1	0.995671
T4085672	TraesCSU02G083800	chr6A	659143062	659143292	1	1
T4085673	TraesCSU02G222400	chr6A	659147627	659147857	1	1
T4085674	TraesCSU02G082300	chr6A	659176910	659177140	1	1
T4085675	TraesCSU02G082400	chr6A	659181586	659181816	1	1
T4085676	TraesCSU02G210800	chr6A	659183194	659183424	1	0.987013
T4085677	TraesCSU02G221000	chr6A	659207595	659207825	1	1
T4085678	TraesCSU02G210900	chr6A	659211917	659212147	1	0.991342
T4085712	TraesCSU02G081700	chr6A	661192264	661193073	1	1
T4085713	TraesCSU02G081800	chr6A	661193302	661197364	1	1
T4085714	TraesCSU02G081900	chr6A	661224641	661231240	1	1
T4085716	TraesCSU02G082100	chr6A	661237016	661239240	1	1
T4085721	TraesCSU02G084300	chr6B	55774	68002	0.999311	0.999311
T4085722	TraesCSU02G084400	chr6B	59963	60778	1	1
T4085723	TraesCSU02G084200	chr6B	83720	84978	1	1
T4085739	TraesCSU02G162000	chr6B	1482468	1484424	1	1
T4085765	TraesCSU02G243100	chr6B	3525295	3526161	1	1
T4085767	TraesCSU02G257300	chr6B	3555461	3555694	1	0.995726
T4085817	TraesCSU02G195100	chr6B	6375046	6376919	1	1
T4085855	TraesCSU02G084500	chr6B	9085315	9087182	1	1
T4085856	TraesCSU02G084600	chr6B	9147672	9149494	1	1
T4085857	TraesCSU02G084700	chr6B	9167293	9169424	1	1
T4085858	TraesCSU02G084800	chr6B	9183769	9185488	1	1
T4085859	TraesCSU02G266600	chr6B	9272936	9273493	1	1
T4085877	TraesCSU02G154000	chr6B	10469912	10471045	1	0.997354
T4085878	TraesCSU02G202400	chr6B	10482235	10483531	1	0.999229
T4085879	TraesCSU02G162200	chr6B	10527188	10527633	1	1
T4085896	TraesCSU02G223200	chr6B	11234635	11235758	0.999111	0.986667
T4085914	TraesCSU02G085100	chr6B	13874851	13877667	1	1
T4085915	TraesCSU02G085000	chr6B	13880201	13884426	1	1
T4085916	TraesCSU02G084900	chr6B	13928355	13929080	1	1
T4085917	TraesCSU02G161200	chr6B	13935497	13936780	0.993039	0.992266
T4085950	TraesCSU02G219300	chr6B	15784289	15786785	1	1
T4085951	TraesCSU02G085200	chr6B	15790097	15791331	1	1
T4085952	TraesCSU02G202100	chr6B	15810544	15813715	1	1
T4085955	TraesCSU02G085300	chr6B	15866027	15870881	1	0.999399
T4086087	TraesCSU02G205800	chr6B	24479952	24483572	1	1
T4086209	TraesCSU02G085500	chr6B	33307232	33308305	1	1
T4086245	TraesCSU02G085400	chr6B	35011189	35012349	0.999139	0.999139
T4086296	TraesCSU02G182400	chr6B	40788043	40789495	1	1
T4086364	TraesCSU02G234800	chr6B	47285062	47285831	1	1
T4086378	TraesCSU02G249200	chr6B	48589277	48589955	0.986726	0.920354
T4086412	TraesCSU02G107600	chr6B	50457943	50459392	0.576297	0.555383
T4086416	TraesCSU02G267761	chr6B	50568891	50569589	1	1
T4086422	TraesCSU02G107700	chr6B	50839316	50843050	0.835079	0.766238
T4086425	TraesCSU02G272997	chr6B	50883663	50883716	1	1
T4086430	TraesCSU02G202177	chr6B	51177725	51178298	1	0.991289
T4086431	TraesCSU02G149933	chr6B	51196953	51197831	0.996599	0.986395
T4086434	TraesCSU02G255529	chr6B	51253162	51253757	1	0.99654
T4086435	TraesCSU02G149951	chr6B	51279440	51280255	0.915825	0.869809
T4086443	TraesCSU02G149938	chr6B	51705373	51705810	1	1
T4086444	TraesCSU02G149946	chr6B	51733569	51734447	1	1
T4086445	TraesCSU02G265913	chr6B	51749548	51750171	1	0.998374
T4086446	TraesCSU02G251939	chr6B	51760061	51760573	0.998031	0.990157
T4086501	TraesCSU02G132200	chr6B	56189834	56196254	0.99214	0.975152
T4086513	TraesCSU02G027600	chr6B	56558038	56558368	1	0.963303
T4086525	TraesCSU02G165700	chr6B	58075799	58078776	1	1
T4086557	TraesCSU02G174700	chr6B	60913940	60914555	1	1
T4086558	TraesCSU02G210300	chr6B	60936299	60936874	1	1
T4086596	TraesCSU02G086200	chr6B	64818495	64819182	1	1
T4086597	TraesCSU02G086100	chr6B	64822025	64823307	1	1
T4086607	TraesCSU02G080200	chr6B	66189609	66192848	0.943066	0.866667
T4086675	TraesCSU02G118300	chr6B	72309107	72310752	1	1
T4086787	TraesCSU02G257900	chr6B	86746288	86746932	1	0.99845
T4086788	TraesCSU02G086300	chr6B	86777823	86779745	1	0.999335
T4086789	TraesCSU02G086400	chr6B	86788282	86798983	1	0.99869
T4086790	TraesCSU02G086500	chr6B	86849007	86851809	1	1
T4086791	TraesCSU02G086600	chr6B	86851932	86855728	1	1
T4086852	TraesCSU02G142500	chr6B	95265768	95271615	0.920888	0.907622
T4086853	TraesCSU02G142600	chr6B	95275126	95277501	1	1
T4086856	TraesCSU02G143900	chr6B	95685278	95687062	0.980116	0.940348
T4086889	TraesCSU02G168600	chr6B	100163351	100163659	0.735714	0.709524
T4086900	TraesCSU02G086700	chr6B	102509133	102513503	1	0.999219
T4086913	TraesCSU02G017800	chr6B	104487575	104488748	0.823404	0.757447
T4087009	TraesCSU02G258100	chr6B	125291122	125291499	1	1
T4087011	TraesCSU02G075700	chr6B	125299731	125300108	1	0.992593
T4087064	TraesCSU02G269600	chr6B	126550008	126550305	1	0.993266
T4087117	TraesCSU02G250000	chr6B	133198920	133200030	1	1
T4087118	TraesCSU02G086800	chr6B	133202978	133203274	1	1
T4087304	TraesCSU02G153300	chr6B	155788590	155789075	1	0.992063
T4087305	TraesCSU02G219600	chr6B	155805128	155807148	1	1
T4087398	TraesCSU02G087400	chr6B	168172098	168172814	1	1
T4087399	TraesCSU02G087500	chr6B	168186164	168188467	1	1
T4087573	TraesCSU02G087600	chr6B	194235322	194253151	1	1
T4087578	TraesCSU02G209000	chr6B	195661759	195662349	1	0.980263
T4087699	TraesCSU02G190500	chr6B	217733675	217735117	0.926865	0.92252
T4088098	TraesCSU02G087800	chr6B	332355171	332357861	1	1
T4088220	TraesCSU02G181400	chr6B	409187757	409195693	0.945011	0.945011
T4088225	TraesCSU02G015600	chr6B	413621931	413623362	0.502903	0.429608
T4088276	TraesCSU02G182100	chr6B	435385508	435386696	1	1
T4088332	TraesCSU02G240400	chr6B	458103815	458104899	0.978109	0.892537
T4089299	TraesCSU02G258500	chr6B	638021128	638021490	1	1
T4089303	TraesCSU02G244800	chr6B	638170465	638171430	1	0.99793
T4089305	TraesCSU02G244700	chr6B	638197261	638198274	1	1
T4089335	TraesCSU02G087900	chr6B	644528698	644531298	0.998781	0.998781
T4089399	TraesCSU02G237300	chr6B	653920282	653920554	1	0.992674
T4089441	TraesCSU02G047800	chr6B	659023051	659025075	1	1
T4089442	TraesCSU02G204900	chr6B	659049566	659051130	1	1
T4089645	TraesCSU02G203000	chr6B	688470018	688472003	1	1
T4089660	TraesCSU02G080600	chr6B	691464478	691472369	0.998074	0.981065
T4089661	TraesCSU02G080700	chr6B	691472799	691478061	0.98191	0.940704
T4089889	TraesCSU02G088200	chr6B	715860389	715860709	1	1
T4089890	TraesCSU02G088100	chr6B	715869916	715871704	1	1
T4089891	TraesCSU02G088400	chr6B	715881779	715882335	0.997826	0.993478
T4089892	TraesCSU02G088500	chr6B	715900564	715900884	1	1
T4089893	TraesCSU02G088300	chr6B	715952364	715952684	1	1
T4089939	TraesCSU02G088600	chr6B	720883797	720884666	1	1
T4089940	TraesCSU02G088700	chr6B	720900111	720902084	1	1
T4089942	TraesCSU02G196700	chr6B	721035288	721036014	1	0.959384
T4089962	TraesCSU02G165100	chr6B	722327060	722329909	1	1
T4089963	TraesCSU02G193000	chr6B	722341158	722343002	1	1
T4089964	TraesCSU02G193100	chr6B	722343075	722343866	1	1
T4089965	TraesCSU02G165212	chr6B	722465328	722468014	1	1
T4089966	TraesCSU02G155900	chr6B	722468442	722474310	1	1
T4090078	TraesCSU02G156600	chr6B	731330826	731335490	1	0.999559
T4090080	TraesCSU02G227700	chr6B	731522398	731523249	1	1
T4090115	TraesCSU02G088800	chr6B	734650618	734651126	0.944341	0.944341
T4090360	TraesCSU02G179000	chr6B	751106375	751113409	1	1
T4090366	TraesCSU02G165600	chr6B	751562783	751573121	1	0.999334
T4090367	TraesCSU02G168100	chr6B	751615300	751617962	1	1
T4090527	TraesCSU02G089300	chr6B	759490257	759492300	1	1
T4090528	TraesCSU02G089500	chr6B	759541214	759541567	1	1
T4090529	TraesCSU02G178000	chr6B	759746666	759749596	1	1
T4090530	TraesCSU02G089200	chr6B	759803659	759804537	1	1
T4090531	TraesCSU02G089100	chr6B	759819716	759822798	1	1
T4090532	TraesCSU02G089400	chr6B	759866506	759869795	1	1
T4090533	TraesCSU02G088900	chr6B	759875320	759876695	1	1
T4090534	TraesCSU02G089000	chr6B	759879968	759880842	1	1
T4090538	TraesCSU02G155500	chr6B	760052082	760056236	1	0.999549
T4090569	TraesCSU02G071000	chr6B	761647954	761650567	0.735073	0.667404
T4090588	TraesCSU02G011200	chr6B	762262245	762264518	1	1
T4090589	TraesCSU02G011100	chr6B	762265042	762266604	1	1
T4090590	TraesCSU02G011000	chr6B	762276363	762289080	1	1
T4090591	TraesCSU02G071900	chr6B	762302184	762302414	1	1
T4090618	TraesCSU02G232800	chr6B	764093520	764095564	1	1
T4090705	TraesCSU02G228700	chr6D	1770659	1772914	1	0.999113
T4090775	TraesCSU02G218800	chr6D	4192877	4193239	1	1
T4090804	TraesCSU02G206000	chr6D	5504261	5506158	1	1
T4090860	TraesCSU02G089600	chr6D	8755898	8756479	1	1
T4090863	TraesCSU02G090000	chr6D	8782602	8792069	1	0.98473
T4090864	TraesCSU02G090200	chr6D	8864833	8867916	1	1
T4090865	TraesCSU02G090205	chr6D	8865210	8865974	1	1
T4090866	TraesCSU02G089705	chr6D	8960015	8961460	0.998617	0.936376
T4090976	TraesCSU02G164300	chr6D	12575914	12577758	0.999444	0.937709
T4091030	TraesCSU02G079800	chr6D	16245200	16255297	0.78744	0.78744
T4091031	TraesCSU02G079700	chr6D	16271661	16273299	1	1
T4091032	TraesCSU02G079500	chr6D	16323652	16331733	0.999658	0.983607
T4091033	TraesCSU02G079400	chr6D	16328566	16331872	0.999494	0.985316
T4091034	TraesCSU02G079300	chr6D	16334539	16337528	0.999097	0.959801
T4091035	TraesCSU02G079200	chr6D	16339716	16342072	1	1
T4091037	TraesCSU02G079100	chr6D	16349868	16352197	1	1
T4091270	TraesCSU02G132600	chr6D	29984871	29985632	1	1
T4091271	TraesCSU02G132700	chr6D	29987420	29988177	1	1
T4091272	TraesCSU02G132800	chr6D	29994776	29995555	1	1
T4091273	TraesCSU02G132900	chr6D	29998655	29999780	1	1
T4091297	TraesCSU02G141600	chr6D	31420506	31421117	1	1
T4091298	TraesCSU02G141700	chr6D	31421240	31428322	1	1
T4091299	TraesCSU02G141800	chr6D	31429348	31432514	1	1
T4091366	TraesCSU02G116600	chr6D	36390530	36394168	1	1
T4091412	TraesCSU02G195700	chr6D	40295109	40296926	1	1
T4091438	TraesCSU02G143700	chr6D	42714049	42716046	1	1
T4091439	TraesCSU02G143600	chr6D	42744475	42745775	1	1
T4091467	TraesCSU02G134500	chr6D	44793612	44793833	1	1
T4091468	TraesCSU02G134400	chr6D	44798963	44802036	1	1
T4091631	TraesCSU02G028400	chr6D	62720165	62721177	1	1
T4091632	TraesCSU02G028300	chr6D	62727517	62731576	1	1
T4091633	TraesCSU02G028200	chr6D	62775565	62776596	1	1
T4091634	TraesCSU02G028000	chr6D	62843920	62853795	0.772826	0.772826
T4091813	TraesCSU02G025900	chr6D	80442453	80446606	1	1
T4091825	TraesCSU02G017900	chr6D	82191612	82193844	1	1
T4091827	TraesCSU02G017700	chr6D	82232927	82234168	1	1
T4091864	TraesCSU02G131700	chr6D	89125829	89126341	1	0.992908
T4092107	TraesCSU02G117000	chr6D	116828284	116830755	1	1
T4092108	TraesCSU02G117100	chr6D	116831309	116834889	1	1
T4092161	TraesCSU02G024100	chr6D	124276118	124276883	1	1
T4092248	TraesCSU02G016500	chr6D	137684925	137686402	1	1
T4092408	TraesCSU02G109600	chr6D	159735274	159736215	1	1
T4092576	TraesCSU02G127300	chr6D	211382513	211383340	1	1
T4092577	TraesCSU02G127400	chr6D	211390959	211392464	1	1
T4092746	TraesCSU02G140200	chr6D	294377922	294378730	1	1
T4092747	TraesCSU02G140125	chr6D	294526287	294549583	1	1
T4092748	TraesCSU02G140100	chr6D	294578375	294581373	1	1
T4092902	TraesCSU02G035800	chr6D	320994496	320997596	1	1
T4092903	TraesCSU02G035900	chr6D	320999761	321004571	1	1
T4092904	TraesCSU02G036000	chr6D	321063226	321066523	1	0.999589
T4092905	TraesCSU02G036100	chr6D	321072442	321073905	1	1
T4093585	TraesCSU02G103900	chr6D	413984864	413987615	0.997278	0.943739
T4093654	TraesCSU02G075800	chr6D	419909789	419930683	1	1
T4094107	TraesCSU02G260900	chr6D	465570809	465570937	1	1
T4094121	TraesCSU02G261900	chr6D	466058482	466058733	1	1
T4094322	TraesCSU02G019700	chr6D	481806100	481811831	1	0.992937
T4094323	TraesCSU02G019600	chr6D	481812558	481816083	1	0.998552
T4094357	TraesCSU02G090400	chr6D	483223741	483224292	1	1
T4094845	TraesCSU02G083600	chr6D	507658426	507660225	1	1
T4094867	TraesCSU02G165800	chr6D	508402976	508404294	1	1
T4094898	TraesCSU02G072100	chr6D	510048012	510050633	0.75889	0.72841
T4094906	TraesCSU02G236300	chr6D	510575214	510575444	1	1
T4094907	TraesCSU02G238100	chr6D	510586274	510586504	1	1
T4094908	TraesCSU02G203300	chr6D	510591824	510592054	1	1
T4094914	TraesCSU02G090900	chr6D	510728359	510728589	1	0.987013
T4094991	TraesCSU02G226900	chr7A	1594697	1595686	1	1
T4094994	TraesCSU02G091500	chr7A	1785907	1788832	1	1
T4095000	TraesCSU02G091800	chr7A	2056894	2057316	1	1
T4095003	TraesCSU02G091700	chr7A	2112803	2115283	1	1
T4095096	TraesCSU02G159200	chr7A	6515097	6515976	1	1
T4095097	TraesCSU02G256100	chr7A	6533505	6534631	1	0.999027
T4095100	TraesCSU02G256200	chr7A	6767486	6768611	1	0.999025
T4095141	TraesCSU02G091600	chr7A	8395744	8398059	1	1
T4095374	TraesCSU02G168200	chr7A	19559170	19561113	1	1
T4095391	TraesCSU02G064100	chr7A	20518535	20521665	0.92219	0.818764
T4095400	TraesCSU02G196500	chr7A	20856719	20860592	1	1
T4095580	TraesCSU02G092000	chr7A	31595936	31602962	0.999009	0.993062
T4095581	TraesCSU02G091900	chr7A	31602984	31606254	0.991979	0.965241
T4095675	TraesCSU02G092500	chr7A	37885441	37888342	1	0.999644
T4095676	TraesCSU02G213300	chr7A	37888189	37888503	1	1
T4095716	TraesCSU02G092600	chr7A	40897218	40897639	1	1
T4095831	TraesCSU02G214400	chr7A	52871802	52872406	1	0.998095
T4095832	TraesCSU02G175600	chr7A	52885624	52886228	1	0.998095
T4095847	TraesCSU02G234300	chr7A	53757199	53757924	1	1
T4095873	TraesCSU02G092700	chr7A	55802290	55803753	1	1
T4095931	TraesCSU02G092900	chr7A	62008723	62010405	1	1
T4095998	TraesCSU02G272200	chr7A	66688727	66689023	1	1
T4096079	TraesCSU02G222500	chr7A	71811669	71812562	1	1
T4096107	TraesCSU02G264200	chr7A	74497614	74498401	1	1
T4096220	TraesCSU02G093300	chr7A	86032531	86034493	1	1
T4096221	TraesCSU02G093400	chr7A	86067909	86068561	1	1
T4096224	TraesCSU02G182300	chr7A	86210210	86210620	1	0.951338
T4096418	TraesCSU02G075000	chr7A	102847969	102848832	1	1
T4096888	TraesCSU02G154300	chr7A	153574309	153576016	1	0.998004
T4097148	TraesCSU02G174800	chr7A	188657458	188658910	1	1
T4097150	TraesCSU02G230600	chr7A	188866908	188868026	1	1
T4097250	TraesCSU02G167000	chr7A	204957984	204961028	1	1
T4097251	TraesCSU02G189600	chr7A	204993857	204996360	1	1
T4097305	TraesCSU02G142100	chr7A	213251295	213255209	1	1
T4097492	TraesCSU02G166200	chr7A	238140176	238142353	0.995885	0.946045
T4097573	TraesCSU02G247800	chr7A	256727997	256728887	1	0.997506
T4097574	TraesCSU02G010800	chr7A	256839917	256843378	1	1
T4097648	TraesCSU02G218600	chr7A	272687219	272688430	1	1
T4097649	TraesCSU02G217700	chr7A	272819905	272821116	1	1
T4097964	TraesCSU02G157400	chr7A	378320867	378321220	1	0.985876
T4097969	TraesCSU02G270200	chr7A	378323270	378323683	1	1
T4097993	TraesCSU02G135000	chr7A	382719378	382726600	1	1
T4097994	TraesCSU02G135100	chr7A	382847784	382851666	1	1
T4098640	TraesCSU02G151000	chr7A	551462769	551464088	1	0.947917
T4098739	TraesCSU02G252700	chr7A	573274789	573275103	0.990566	0.990566
T4099086	TraesCSU02G252400	chr7A	614259479	614260479	1	1
T4099223	TraesCSU02G181800	chr7A	638875612	638876539	1	1
T4099224	TraesCSU02G171700	chr7A	638981284	638987313	1	1
T4099359	TraesCSU02G141500	chr7A	656883879	656896044	1	1
T4099411	TraesCSU02G191200	chr7A	664648249	664650597	1	1
T4099412	TraesCSU02G093700	chr7A	664668542	664670463	1	1
T4099423	TraesCSU02G203100	chr7A	666178463	666179786	1	1
T4099428	TraesCSU02G043000	chr7A	667192390	667195103	1	1
T4099429	TraesCSU02G042900	chr7A	667197546	667199953	1	1
T4099430	TraesCSU02G042800	chr7A	667201054	667201839	1	1
T4099431	TraesCSU02G153700	chr7A	667202829	667204491	1	1
T4099432	TraesCSU02G191100	chr7A	667247726	667250018	1	1
T4099433	TraesCSU02G164700	chr7A	667256120	667264288	1	1
T4099434	TraesCSU02G165400	chr7A	667260709	667263380	1	1
T4099435	TraesCSU02G160600	chr7A	667287061	667288555	1	1
T4099436	TraesCSU02G044000	chr7A	667292199	667295857	1	1
T4099437	TraesCSU02G043100	chr7A	667309133	667310365	1	1
T4099438	TraesCSU02G043500	chr7A	667333413	667335816	1	1
T4099439	TraesCSU02G043400	chr7A	667337788	667340034	0.996011	0.995567
T4099441	TraesCSU02G046600	chr7A	667359740	667365584	1	1
T4099442	TraesCSU02G045600	chr7A	667426210	667427376	1	1
T4099479	TraesCSU02G253800	chr7A	671725110	671726471	1	0.998532
T4099595	TraesCSU02G147800	chr7A	684622000	684623073	1	0.995345
T4099903	TraesCSU02G208800	chr7A	718754564	718758253	1	1
T4099974	TraesCSU02G262600	chr7A	723701001	723701434	1	1
T4099977	TraesCSU02G035100	chr7A	723780902	723784844	1	1
T4099978	TraesCSU02G035000	chr7A	723830137	723830925	1	1
T4099979	TraesCSU02G034900	chr7A	723845033	723847398	1	1
T4099980	TraesCSU02G034800	chr7A	723853837	723856848	1	1
T4099981	TraesCSU02G034700	chr7A	723857540	723859832	1	1
T4099983	TraesCSU02G034500	chr7A	723878029	723880365	1	1
T4099984	TraesCSU02G034400	chr7A	723918960	723920042	1	1
T4099985	TraesCSU02G034300	chr7A	723926591	723927994	1	1
T4099986	TraesCSU02G034100	chr7A	723934310	723937360	1	1
T4099987	TraesCSU02G034000	chr7A	723939338	723944756	1	1
T4099988	TraesCSU02G033900	chr7A	723958111	723961739	1	1
T4099989	TraesCSU02G033800	chr7A	723963434	723964084	1	1
T4099990	TraesCSU02G033700	chr7A	723966187	723976207	1	1
T4099991	TraesCSU02G033600	chr7A	724036869	724039103	1	1
T4099994	TraesCSU02G033500	chr7A	724075273	724077635	1	1
T4099995	TraesCSU02G033400	chr7A	724090301	724092493	1	1
T4099996	TraesCSU02G033300	chr7A	724099673	724101352	1	1
T4099997	TraesCSU02G033200	chr7A	724103558	724104358	1	1
T4099998	TraesCSU02G033100	chr7A	724109993	724110238	1	1
T4099999	TraesCSU02G033000	chr7A	724132581	724133275	1	1
T4100000	TraesCSU02G032900	chr7A	724152498	724152787	1	1
T4100001	TraesCSU02G032800	chr7A	724161708	724161995	1	1
T4100002	TraesCSU02G032700	chr7A	724164185	724168302	1	1
T4100003	TraesCSU02G032600	chr7A	724182483	724184054	1	1
T4100004	TraesCSU02G032500	chr7A	724202160	724211183	1	1
T4100005	TraesCSU02G032400	chr7A	724217064	724221104	1	1
T4100006	TraesCSU02G032300	chr7A	724233926	724235238	1	1
T4100007	TraesCSU02G032200	chr7A	724298338	724300037	1	1
T4100162	TraesCSU02G252100	chr7A	737767019	737767612	1	1
T4100167	TraesCSU02G229200	chr7A	737943214	737943807	1	0.979798
T4100246	TraesCSU02G098600	chr7A	744546530	744547462	0.880383	0.797129
T4100284	TraesCSU02G235900	chr7A	748600706	748602376	1	1
T4100295	TraesCSU02G093800	chr7A	750766744	750768989	1	1
T4100296	TraesCSU02G093900	chr7A	750769698	750772657	1	1
T4100329	TraesCSU02G094300	chr7A	752699898	752700656	1	1
T4100386	TraesCSU02G226200	chr7A	755993174	755995147	1	1
T4100452	TraesCSU02G200600	chr7A	761332749	761333699	1	0.992639
T4100550	TraesCSU02G217000	chr7A	766688688	766690067	1	1
T4100560	TraesCSU02G227600	chr7A	767269239	767270033	1	1
T4100630	TraesCSU02G172400	chr7A	773448385	773448907	1	1
T4100704	TraesCSU02G094500	chr7A	778592051	778593025	1	1
T4100706	TraesCSU02G094700	chr7A	778655116	778656244	1	1
T4100773	TraesCSU02G243300	chr7A	783302700	783303769	1	1
T4100785	TraesCSU02G094800	chr7A	783798566	783799980	1	1
T4100786	TraesCSU02G172200	chr7A	783814697	783816494	1	1
T4100897	TraesCSU02G245700	chr7A	792694778	792695359	1	0.996564
T4100898	TraesCSU02G185000	chr7A	792816158	792817192	1	1
T4100899	TraesCSU02G238300	chr7A	793034028	793035062	1	0.99729
T4100915	TraesCSU02G242900	chr7A	795231557	795232214	1	1
T4100918	TraesCSU02G242800	chr7A	795287737	795288290	1	0.994585
T4100920	TraesCSU02G243800	chr7A	795380222	795382105	1	1
T4101006	TraesCSU02G095000	chr7B	2664952	2668417	1	1
T4101007	TraesCSU02G095100	chr7B	2681787	2683299	1	1
T4101008	TraesCSU02G095200	chr7B	2686806	2687787	1	1
T4101081	TraesCSU02G095400	chr7B	8230388	8232341	1	1
T4101088	TraesCSU02G096200	chr7B	8504990	8506729	1	1
T4101092	TraesCSU02G235700	chr7B	8699311	8699810	1	1
T4101145	TraesCSU02G095800	chr7B	16238215	16238911	1	1
T4101146	TraesCSU02G095600	chr7B	16251897	16253673	1	1
T4101149	TraesCSU02G197600	chr7B	16438551	16440175	1	1
T4101150	TraesCSU02G095900	chr7B	16593675	16601023	1	1
T4101151	TraesCSU02G223100	chr7B	16609866	16611903	1	1
T4101152	TraesCSU02G095500	chr7B	16613118	16627860	1	1
T4101153	TraesCSU02G159700	chr7B	16664757	16669616	0.828614	0.755233
T4101575	TraesCSU02G153500	chr7B	69292889	69294656	0.776611	0.77521
T4101619	TraesCSU02G096400	chr7B	76256743	76258533	1	0.997698
T4101684	TraesCSU02G271500	chr7B	83373444	83374205	1	1
T4101685	TraesCSU02G237100	chr7B	83378413	83379978	1	0.998494
T4101782	TraesCSU02G031400	chr7B	97289112	97289576	1	1
T4101783	TraesCSU02G031500	chr7B	97297368	97298147	1	1
T4101784	TraesCSU02G031600	chr7B	97299104	97302050	1	1
T4101785	TraesCSU02G031700	chr7B	97326508	97332159	1	1
T4101786	TraesCSU02G031800	chr7B	97381968	97383277	1	1
T4101787	TraesCSU02G031900	chr7B	97412780	97416152	1	1
T4101788	TraesCSU02G032000	chr7B	97531455	97537844	0.999747	0.999241
T4101789	TraesCSU02G032100	chr7B	97617741	97618974	1	1
T4101857	TraesCSU02G264500	chr7B	105319710	105320591	1	0.965636
T4101869	TraesCSU02G015200	chr7B	107620268	107621278	1	1
T4101889	TraesCSU02G176600	chr7B	111919224	111919631	1	1
T4101890	TraesCSU02G177900	chr7B	111950058	111950543	1	1
T4102020	TraesCSU02G163200	chr7B	125570479	125571774	1	1
T4102021	TraesCSU02G096700	chr7B	125587138	125588431	1	0.999165
T4102022	TraesCSU02G096600	chr7B	125663502	125664743	1	1
T4102149	TraesCSU02G236500	chr7B	141768051	141768317	1	1
T4102150	TraesCSU02G236600	chr7B	141810066	141810332	1	1
T4102349	TraesCSU02G104600	chr7B	171150701	171154549	0.9921	0.9684
T4102527	TraesCSU02G096800	chr7B	208628875	208629426	1	1
T4102772	TraesCSU02G096500	chr7B	261275154	261275540	1	1
T4102918	TraesCSU02G136400	chr7B	321258168	321259262	1	1
T4102919	TraesCSU02G136300	chr7B	321284125	321288701	1	1
T4102954	TraesCSU02G013000	chr7B	343663759	343666791	0.902418	0.874784
T4102993	TraesCSU02G219100	chr7B	352032835	352034296	0.997696	0.995392
T4102994	TraesCSU02G175500	chr7B	352099156	352102875	1	1
T4103050	TraesCSU02G183600	chr7B	361912906	361913558	1	1
T4103051	TraesCSU02G192000	chr7B	361929603	361930709	1	1
T4103052	TraesCSU02G211900	chr7B	361934171	361935654	1	1
T4103215	TraesCSU02G272100	chr7B	412854977	412855240	1	1
T4103294	TraesCSU02G241100	chr7B	430943762	430944989	1	1
T4103299	TraesCSU02G157000	chr7B	434183913	434184383	1	0.993631
T4103302	TraesCSU02G262000	chr7B	434189199	434189506	0.996764	0.993528
T4103304	TraesCSU02G174400	chr7B	434194567	434195208	0.995349	0.982946
T4103307	TraesCSU02G239700	chr7B	434198672	434198935	1	1
T4103308	TraesCSU02G259600	chr7B	434203587	434204000	1	0.997585
T4103309	TraesCSU02G265200	chr7B	434203771	434203986	1	1
T4103311	TraesCSU02G035300	chr7B	434208538	434208759	1	1
T4103315	TraesCSU02G267600	chr7B	434212943	434213302	1	0.997222
T4103316	TraesCSU02G261000	chr7B	434214247	434214447	1	0.995025
T4103317	TraesCSU02G266100	chr7B	434214890	434215018	1	1
T4103318	TraesCSU02G258800	chr7B	434215826	434215939	1	1
T4103320	TraesCSU02G259100	chr7B	434217396	434217647	1	0.992063
T4103322	TraesCSU02G272300	chr7B	434218014	434218157	1	1
T4103335	TraesCSU02G097000	chr7B	437260918	437261592	1	1
T4103336	TraesCSU02G097100	chr7B	437285353	437286905	1	1
T4103337	TraesCSU02G097200	chr7B	437308213	437308551	1	1
T4103338	TraesCSU02G097300	chr7B	437330793	437331026	1	1
T4104104	TraesCSU02G097600	chr7B	562495836	562503424	1	1
T4104533	TraesCSU02G239100	chr7B	629904422	629905189	1	1
T4104534	TraesCSU02G227800	chr7B	629913374	629914132	1	1
T4104668	TraesCSU02G097700	chr7B	643937216	643938151	1	1
T4104778	TraesCSU02G243000	chr7B	662619275	662619547	1	0.981061
T4104874	TraesCSU02G097900	chr7B	673728802	673732992	1	1
T4104875	TraesCSU02G200300	chr7B	673759567	673761019	1	1
T4104877	TraesCSU02G192500	chr7B	673842124	673843598	1	1
T4104905	TraesCSU02G097800	chr7B	678571124	678573655	1	1
T4104955	TraesCSU02G105100	chr7B	682737105	682738576	0.690134	0.654693
T4105000	TraesCSU02G213700	chr7B	686397051	686399576	1	1
T4105043	TraesCSU02G218500	chr7B	692531731	692533375	1	1
T4105051	TraesCSU02G211000	chr7B	692909601	692911437	1	1
T4105147	TraesCSU02G244400	chr7B	703370618	703371913	1	1
T4105151	TraesCSU02G254900	chr7B	703789368	703790696	0.977193	0.977193
T4105223	TraesCSU02G227500	chr7B	712105079	712105742	1	1
T4105262	TraesCSU02G209600	chr7B	717761232	717761739	1	0.996063
T4105311	TraesCSU02G098100	chr7B	725101314	725102760	1	1
T4105362	TraesCSU02G098800	chr7B	728551249	728553215	1	0.99816
T4105371	TraesCSU02G098500	chr7B	730216793	730217275	0.997807	0.903509
T4105385	TraesCSU02G162900	chr7B	731273239	731280576	1	1
T4105386	TraesCSU02G098400	chr7B	731294780	731297426	1	1
T4105388	TraesCSU02G098200	chr7B	731346750	731347442	1	1
T4105407	TraesCSU02G098900	chr7B	733863613	733870507	1	1
T4105410	TraesCSU02G263000	chr7B	734273676	734274538	1	1
T4105484	TraesCSU02G210600	chr7B	743623539	743626199	1	0.999225
T4105487	TraesCSU02G087000	chr7B	743991898	743993437	0.992894	0.927649
T4105498	TraesCSU02G171300	chr7B	745645540	745654056	1	1
T4105514	TraesCSU02G087100	chr7B	747659796	747660103	0.956386	0.894081
T4105518	TraesCSU02G094100	chr7B	748039154	748039842	0.758929	0.689732
T4105537	TraesCSU02G147500	chr7B	749562133	749563183	1	0.998802
T4105672	TraesCSU02G173200	chr7B	759280711	759284103	1	1
T4105787	TraesCSU02G178100	chr7B	768220876	768227216	1	1
T4105843	TraesCSU02G232300	chr7B	770641366	770641655	1	1
T4105853	TraesCSU02G200200	chr7B	771290946	771292669	0.992298	0.992298
T4105865	TraesCSU02G179800	chr7B	772085780	772086872	0.839226	0.822391
T4105867	TraesCSU02G196300	chr7B	772189815	772191244	0.999251	0.991011
T4105878	TraesCSU02G241000	chr7B	772727014	772727262	1	1
T4105920	TraesCSU02G200800	chr7B	777521789	777522591	1	1
T4105951	TraesCSU02G207100	chr7B	780602794	780604019	1	1
T4105952	TraesCSU02G099300	chr7B	780700312	780701537	1	1
T4105954	TraesCSU02G225200	chr7B	780931024	780932084	1	1
T4105956	TraesCSU02G224700	chr7B	780966863	780967480	1	1
T4105960	TraesCSU02G099200	chr7B	781202650	781203576	1	1
T4105961	TraesCSU02G099100	chr7B	781211547	781212485	1	1
T4105975	TraesCSU02G224400	chr7B	781918142	781919345	1	1
T4106010	TraesCSU02G105700	chr7B	785561431	785561823	0.530055	0.467213
T4106013	TraesCSU02G099400	chr7B	785625081	785631437	1	1
T4106014	TraesCSU02G099500	chr7B	785659234	785662352	1	1
T4106034	TraesCSU02G201900	chr7B	787633147	787633893	0.904685	0.861066
T4106035	TraesCSU02G167200	chr7B	787763688	787764480	1	1
T4106038	TraesCSU02G146200	chr7B	787923646	787926762	1	0.999241
T4106041	TraesCSU02G215100	chr7B	788086486	788088895	1	1
T4106045	TraesCSU02G100100	chr7B	788300707	788302853	1	0.999071
T4106046	TraesCSU02G267300	chr7B	788339372	788340394	1	1
T4106049	TraesCSU02G099900	chr7B	788639016	788643185	1	1
T4106050	TraesCSU02G099800	chr7B	788654527	788656560	1	1
T4106077	TraesCSU02G239500	chr7B	790076431	790076787	1	1
T4106080	TraesCSU02G100200	chr7B	790205996	790206544	1	0.983015
T4106081	TraesCSU02G100300	chr7B	790262431	790263608	1	1
T4106082	TraesCSU02G100400	chr7B	790266510	790267961	1	1
T4106083	TraesCSU02G188500	chr7B	790269799	790271084	0.999223	0.994561
T4106084	TraesCSU02G267900	chr7B	790278923	790279552	1	1
T4106085	TraesCSU02G154700	chr7B	790348125	790351913	0.609778	0.590222
T4106087	TraesCSU02G163900	chr7B	790377235	790387069	1	0.978295
T4106235	TraesCSU02G100900	chr7B	804305734	804308638	1	1
T4106236	TraesCSU02G100800	chr7B	804316474	804320840	1	1
T4106237	TraesCSU02G100700	chr7B	804324789	804329351	1	1
T4106238	TraesCSU02G100500	chr7B	804338288	804342709	0.740884	0.740884
T4106292	TraesCSU02G176200	chr7B	809301984	809302961	1	1
T4106296	TraesCSU02G192400	chr7B	809847866	809852737	1	1
T4106297	TraesCSU02G183800	chr7B	809885845	809889223	1	1
T4106298	TraesCSU02G218200	chr7B	809890227	809891453	1	1
T4106305	TraesCSU02G101000	chr7B	810343306	810346854	0.92278	0.92278
T4106345	TraesCSU02G207700	chr7B	811617909	811619532	1	1
T4106428	TraesCSU02G200700	chr7D	3932204	3932871	0.865487	0.858407
T4106541	TraesCSU02G116900	chr7D	9158172	9161769	1	1
T4106542	TraesCSU02G116800	chr7D	9225306	9225503	1	1
T4106623	TraesCSU02G101600	chr7D	13430232	13430912	1	1
T4106624	TraesCSU02G101700	chr7D	13443586	13445088	1	1
T4106626	TraesCSU02G101800	chr7D	13614548	13616431	0.905343	0.901858
T4106666	TraesCSU02G195000	chr7D	16427103	16427761	0.758939	0.749712
T4106667	TraesCSU02G199600	chr7D	16599234	16600100	1	1
T4106668	TraesCSU02G101500	chr7D	16721312	16722966	1	1
T4106698	TraesCSU02G165900	chr7D	19410483	19410833	1	1
T4106706	TraesCSU02G215300	chr7D	19503734	19504903	0.99659	0.967604
T4106768	TraesCSU02G064600	chr7D	22774769	22777081	0.704018	0.634338
T4106842	TraesCSU02G102400	chr7D	26607428	26609743	1	1
T4106864	TraesCSU02G103000	chr7D	28590652	28592497	1	1
T4106865	TraesCSU02G102900	chr7D	28612243	28614445	1	1
T4106866	TraesCSU02G102800	chr7D	28638319	28639372	1	1
T4106867	TraesCSU02G102700	chr7D	28642104	28650247	1	1
T4106868	TraesCSU02G102600	chr7D	28664733	28668120	1	1
T4106869	TraesCSU02G102500	chr7D	28732116	28735357	1	1
T4106945	TraesCSU02G103100	chr7D	34169942	34172357	0.84064	0.818372
T4107377	TraesCSU02G103700	chr7D	67197038	67202505	0.962815	0.962815
T4107451	TraesCSU02G226700	chr7D	72308366	72309028	0.994872	0.994872
T4107709	TraesCSU02G255100	chr7D	94172352	94173836	0.932203	0.932203
T4107736	TraesCSU02G272000	chr7D	96247209	96247669	1	1
T4107817	TraesCSU02G104000	chr7D	102554272	102555318	1	1
T4107857	TraesCSU02G119400	chr7D	105489739	105491335	1	1
T4107858	TraesCSU02G119200	chr7D	105652186	105656812	1	1
T4107859	TraesCSU02G119100	chr7D	105658937	105661020	1	1
T4107860	TraesCSU02G119000	chr7D	105666345	105670040	1	1
T4107861	TraesCSU02G118900	chr7D	105675270	105677201	1	1
T4107898	TraesCSU02G243400	chr7D	108992627	108993181	1	1
T4107899	TraesCSU02G222800	chr7D	109016605	109017373	1	1
T4107900	TraesCSU02G249500	chr7D	109028204	109028803	1	1
T4107901	TraesCSU02G217500	chr7D	109028885	109029418	1	1
T4107973	TraesCSU02G104200	chr7D	116741197	116746548	1	1
T4107974	TraesCSU02G104100	chr7D	116746994	116750437	1	1
T4108027	TraesCSU02G106000	chr7D	123554634	123557537	1	1
T4108059	TraesCSU02G132000	chr7D	127368225	127377261	1	1
T4108060	TraesCSU02G131900	chr7D	127383846	127386289	1	1
T4108061	TraesCSU02G131800	chr7D	127429974	127435082	1	1
T4108063	TraesCSU02G131600	chr7D	127530170	127534591	1	1
T4108064	TraesCSU02G131500	chr7D	127546187	127549091	1	1
T4108393	TraesCSU02G151100	chr7D	170206226	170207416	0.999092	0.930972
T4108446	TraesCSU02G104400	chr7D	177716047	177716406	1	1
T4108463	TraesCSU02G219000	chr7D	179038127	179038333	0.985714	0.985714
T4108851	TraesCSU02G151500	chr7D	223761366	223761596	1	1
T4108951	TraesCSU02G179900	chr7D	240644255	240647528	0.985447	0.946292
T4109261	TraesCSU02G108500	chr7D	295917735	295918595	1	1
T4109262	TraesCSU02G108300	chr7D	295949283	295950161	0.9701	0.964563
T4109299	TraesCSU02G069900	chr7D	323394187	323394600	1	1
T4109333	TraesCSU02G147700	chr7D	333460681	333460914	1	0.995726
T4109489	TraesCSU02G233200	chr7D	413354856	413355101	1	1
T4109501	TraesCSU02G225300	chr7D	413473520	413474092	1	0.994764
T4109502	TraesCSU02G097400	chr7D	413485007	413485252	1	1
T4109504	TraesCSU02G251000	chr7D	413515576	413515932	1	1
T4109508	TraesCSU02G241300	chr7D	413545861	413546343	1	1
T4109512	TraesCSU02G233700	chr7D	413577261	413577895	0.998428	0.996855
T4109867	TraesCSU02G117400	chr7D	463010888	463013530	1	1
T4109898	TraesCSU02G113900	chr7D	468823104	468823787	1	1
T4110008	TraesCSU02G019800	chr7D	485249769	485250734	1	1
T4110052	TraesCSU02G104500	chr7D	494810504	494812566	1	1
T4110289	TraesCSU02G050500	chr7D	528107750	528110399	1	0.990783
T4110502	TraesCSU02G138100	chr7D	555854967	555855877	1	1
T4110658	TraesCSU02G028500	chr7D	575813191	575814172	1	1
T4110659	TraesCSU02G028600	chr7D	575840811	575841242	1	1
T4110958	TraesCSU02G231100	chr7D	609849919	609851749	1	1
T4111072	TraesCSU02G105000	chr7D	620375186	620376451	1	1
T4111131	TraesCSU02G193800	chr7D	623539046	623541662	1	1
T4111329	TraesCSU02G165200	chr7D	639553654	639554796	0.506414	0.471011
T4111405	TraesCSU02G141900	chr7D	647036422	647065908	1	1
T4111495	TraesCSU02G103400	chr7D	653574726	653576070	1	1
T4111532	TraesCSU02G105200	chr7D	657131297	657135601	1	1
T4111667	TraesCSU02G173100	chr7D	665961328	665964664	1	0.996466
T4111683	TraesCSU02G145500	chr7D	667349460	667350053	1	1
T4111800	TraesCSU02G208900	chr7D	673908621	673910607	1	1
T4111801	TraesCSU02G106200	chr7D	673937258	673939115	1	1
T4111805	TraesCSU02G211600	chr7D	674106039	674109106	0.999517	0.999034
T4111806	TraesCSU02G192700	chr7D	674112178	674116370	1	1
T4111822	TraesCSU02G241700	chr7D	675115154	675116453	0.987842	0.987842
T4111848	TraesCSU02G246300	chr7D	678153315	678154137	1	1
T4111857	TraesCSU02G106400	chr7D	678893622	678895535	1	1
[truncated: 4 more rows]

## Sheet: Table S3
Table S3. Additional gene copies in Triticum 4.0 (T4) and IWGSC v1.0 (IW) assemblies.
T4							IW
T4 Gene ID	IW Gene ID	Chr	Start	End	Function		Gene ID	Chr	Start	End	Function
T4000007	TraesCS1A02G001200	chr1A	101378	101638	TRICHOME BIREFRINGENCE-LIKE 26		TraesCS1A02G060000_2	chr1A	41348518	41349016	Transcriptional regulator MraZ
T4000012	TraesCS1A02G001200	chr1A	319484	319744	TRICHOME BIREFRINGENCE-LIKE 26		TraesCS7A02G388100_2	chr1A	554443737	554443907	NAD(P)H-quinone oxidoreductase subunit 2, chloroplastic
T4000020	TraesCS1A02G001000	chr1A	719064	721395	Mediator of RNA polymerase II transcription subunit 12		TraesCS6D02G057600_2	chr1A	554458618	554458812	Photosystem II reaction center protein K
T4000031	TraesCS1A02G002400	chr1A	1671754	1672179	Cytochrome P450		TraesCSU02G259200_2	chr1A	554466014	554466133	Cytochrome b559 subunit beta
T4000060	TraesCSU02G000200	chr1A	3896480	3897728	Cyclotide mela-1		TraesCS6D02G080000_2	chr1A	554510839	554511079	30S ribosomal protein S19, chloroplastic
T4000065	TraesCSU02G000200	chr1A	4102429	4103677	Cyclotide mela-1		TraesCS7A02G388100_3	chr1A	554516460	554516630	NAD(P)H-quinone oxidoreductase subunit 2, chloroplastic
T4000067	TraesCS1A02G004900	chr1A	4129560	4132544	F-box/LRR-repeat protein		TraesCS1B02G026400_2	chr1B	13235247	13236227	Disease resistance protein RPM1
T4000087	TraesCS1A02G006400	chr1A	4934659	4936116	F-box/LRR-repeat protein		TraesCSU02G267500_2	chr1B	19456018	19456673	Defensin
T4000118	TraesCSU02G186700	chr1A	6886406	6886663	Lipoyl synthase		TraesCS5B02G380100_2	chr1B	142020543	142020659	Photosystem II reaction center protein L
T4000119	TraesCSU02G186700	chr1A	6912164	6912421	Lipoyl synthase		TraesCSU02G267800_2	chr1B	544624636	544624932	ATP synthase gamma chain
T4000120	TraesCSU02G186700	chr1A	6941353	6941610	Lipoyl synthase		TraesCS7A02G388100_4	chr1B	633749516	633749686	NAD(P)H-quinone oxidoreductase subunit 2, chloroplastic
T4000121	TraesCSU02G186700	chr1A	6963850	6964107	Lipoyl synthase		TraesCSU02G267400_2	chr1B	649300057	649300320	GRF zinc finger family protein
T4000125	TraesCS1A02G008200	chr1A	7203165	7205257	MICOS complex subunit Mic25		TraesCS1D02G019500_2	chr1D	8511760	8512739	Thionin
T4000126	TraesCS1A02G008200	chr1A	7207421	7209513	MICOS complex subunit Mic25		TraesCSU02G259200_3	chr1D	394177268	394177387	Cytochrome b559 subunit beta
T4000127	TraesCS1A02G008200	chr1A	7211549	7213641	MICOS complex subunit Mic25		TraesCS5B02G380100_3	chr1D	394177666	394177782	Photosystem II reaction center protein L
T4000181	TraesCS1A02G014100	chr1A	9940723	9941621	Defensin		TraesCSU02G259200_4	chr1D	394177805	394177924	Cytochrome b559 subunit beta
T4000268	TraesCS1A02G022100	chr1A	13482200	13482415	Inhibitor protein		TraesCSU02G268800_2	chr1D	394180506	394180634	Photosystem I reaction center subunit IX
T4000269	TraesCS1A02G022100	chr1A	13492192	13492407	Inhibitor protein		TraesCS6D02G354900_2	chr1D	432548787	432549268	tryptophan aminotransferase related 2
T4000272	TraesCS1A02G022600	chr1A	13806598	13806892	Protein transport protein Sec61 subunit gamma		TraesCS2A02G020500_2	chr2A	10409328	10413084	transmembrane protein, putative (DUF594)
T4000330	TraesCSU02G174500	chr1A	16110920	16111138	Chymotrypsin inhibitor		TraesCS2A02G040400_2	chr2A	20029377	20030426	F-box family protein
T4000331	TraesCSU02G000300	chr1A	16116634	16117249	Chymotrypsin inhibitor		TraesCS2A02G054400_2	chr2A	22628152	22629131	Glutamate receptor ionotropic, NMDA 2D
T4000332	TraesCSU02G000300	chr1A	16121189	16121804	Chymotrypsin inhibitor		TraesCS2A02G159200_2	chr2A	106652922	106653828	RNA-binding (RRM/RBD/RNP motifs) family protein
T4000338	TraesCSU02G174500	chr1A	16418077	16418295	Chymotrypsin inhibitor		TraesCS2A02G231100_2	chr2A	269305019	269305855	Tryptophan synthase alpha chain
T4000339	TraesCSU02G000300	chr1A	16423791	16424406	Chymotrypsin inhibitor		TraesCS2A02G464800_2	chr2A	710042014	710042817	Disease resistance protein (TIR-NBS-LRR class) family
T4000409	TraesCSU02G230900	chr1A	21861089	21861376	Cysteine protease, putative		TraesCS7B02G292600_2	chr2A	719464663	719465166	E3 ubiquitin-protein ligase SINA-like 10
T4000415	TraesCS1A02G035400	chr1A	22154811	22156049	Myb/SANT-like DNA-binding domain protein		TraesCSU02G254600_2	chr2A	726902129	726902329	Protein kinase superfamily protein
T4000419	TraesCSU02G150000	chr1A	23853065	23854415	Homeobox protein, putative		TraesCS7D02G256000_2	chr2A	726902961	726903209	Ras-related small GTP-binding family protein
T4000453	TraesCS1A02G038828	chr1A	25804597	25808406			TraesCS2A02G536800_2	chr2A	750633244	750633799	Serine/threonine-protein kinase
T4000509	TraesCS1A02G043200	chr1A	29513487	29517601	Coiled-coil domain-containing protein, putative		TraesCS2B02G128900_2	chr2B	96242550	96242965	ABC-2 type transporter family protein
T4000518	TraesCS1A02G044700	chr1A	31317173	31318072	actin cross-linking protein (DUF569)		TraesCSU02G240300_2	chr2B	115616143	115618139	DNAse I-like superfamily protein
T4000519	TraesCS1A02G044700	chr1A	31375845	31376744	actin cross-linking protein (DUF569)		TraesCS7D02G390500_2	chr2B	119737539	119738013	myb domain protein 65
T4000526	TraesCS7B02G390500	chr1A	32879965	32882143	F-box protein		TraesCS2B02G173700_2	chr2B	147870158	147870514	RNA-binding (RRM/RBD/RNP motifs) family protein
T4000529	TraesCS1A02G045600	chr1A	33138255	33139236	ATP-dependent helicase/deoxyribonuclease subunit B		TraesCS7A02G388100_5	chr2B	474912653	474912823	NAD(P)H-quinone oxidoreductase subunit 2, chloroplastic
T4000558	TraesCS1A02G048300	chr1A	36791793	36794864	Elongation factor		TraesCS7A02G387500_2	chr2B	474914537	474914895	NAD(P)H-quinone oxidoreductase subunit 2, chloroplastic
T4000565	TraesCSU02G151600	chr1A	37586184	37586705	Mitchondrion orf173		TraesCS2B02G425900_2	chr2B	612079324	612079722	Lysine-specific histone demethylase 1
T4000599	TraesCSU02G000600	chr1A	41939487	41939906	Germin-like protein 1		TraesCS2B02G581800_2	chr2B	769335438	769335915	Pathogenesis-related protein PR-4
T4000601	TraesCS1A02G052500	chr1A	42185099	42185853	CASP-like protein		TraesCS2B02G617800_2	chr2B	794110573	794110947	Disease resistance protein RPM1
T4000603	TraesCS1A02G053200	chr1A	42579014	42580020	Per os infectivity factor 1		TraesCS6D02G354900_3	chr2D	9253714	9254195	tryptophan aminotransferase related 2
T4000646	TraesCSU02G015200	chr1A	45208159	45209169	Fasciclin-like arabinogalactan-protein-like		TraesCS6D02G354900_4	chr2D	30789842	30790323	tryptophan aminotransferase related 2
T4000674	TraesCS1A02G060000	chr1A	49076512	49077009	Transcriptional regulator MraZ		TraesCS6D02G080000_3	chr2D	272795070	272795310	30S ribosomal protein S19, chloroplastic
T4000676	TraesCS1A02G060000	chr1A	49093261	49093759	Transcriptional regulator MraZ		TraesCS2D02G293300_2	chr2D	375636619	375639685	30S ribosomal protein S11
T4000711	TraesCS1A02G063300	chr1A	52430239	52433707	FBD-associated F-box protein		TraesCS6D02G354900_5	chr2D	591289853	591290334	tryptophan aminotransferase related 2
T4000712	TraesCS1A02G063300	chr1A	52473087	52476555	FBD-associated F-box protein		TraesCSU02G254600_3	chr2D	591989799	591989999	Protein kinase superfamily protein
T4000729	TraesCS4A02G253900	chr1A	55671826	55674881	Lecithin-cholesterol acyltransferase-like 1		TraesCS5B02G380100_4	chr2D	628284434	628284550	Photosystem II reaction center protein L
T4000764	TraesCS1A02G068100	chr1A	58176703	58178818	neuronal PAS domain protein		TraesCSU02G258700_2	chr2D	628286103	628286198	Cytochrome b6-f complex subunit 6
T4000765	TraesCS1A02G068200	chr1A	58207033	58208714	PLATZ transcription factor		TraesCSU02G259200_5	chr2D	628287820	628287939	Cytochrome b559 subunit beta
T4000787	TraesCS1A02G070200	chr1A	62676557	62681283	2-oxoglutarate (2OG) and Fe(II)-dependent oxygenase superfamily protein		TraesCS3B02G582300_2	chr2D	630269096	630269368	NADH-quinone oxidoreductase subunit H 1
T4000828	TraesCS1A02G074100	chr1A	67741771	67743102	Protein BIG GRAIN 1-like		TraesCS3A02G005100_2	chr3A	3429296	3429666	Glutamate--cysteine ligase
T4000833	TraesCS1A02G075200	chr1A	68380731	68383857	transmembrane protein		TraesCS3A02G004200_2	chr3A	3941222	3941592	Glutamate--cysteine ligase
T4000863	TraesCS1A02G077400	chr1A	70500862	70503267	aluminum induced protein with YGL and LRDR motifs		TraesCSU02G254600_4	chr3A	66001154	66001354	Protein kinase superfamily protein
T4000875	TraesCS1A02G078400	chr1A	71419851	71421617	Peroxidase		TraesCSU02G270400_2	chr3A	66008064	66008318	Methionine--tRNA ligase
T4000879	TraesCS1A02G078600	chr1A	71655763	71657122	Peroxidase		TraesCS7A02G388100_6	chr3A	66013243	66013413	NAD(P)H-quinone oxidoreductase subunit 2, chloroplastic
T4000880	TraesCS1A02G078600	chr1A	71777528	71778887	Peroxidase		TraesCS7A02G387500_3	chr3A	164854366	164854724	NAD(P)H-quinone oxidoreductase subunit 2, chloroplastic
T4000934	TraesCS1A02G084800	chr1A	81986712	81987014	Minichromosome maintenance (MCM2/3/5) family protein		TraesCS3B02G288400_2	chr3A	477563193	477563691	Methionine S-methyltransferase
T4000940	TraesCS1A02G085300	chr1A	82421377	82421960	Cysteine/Histidine-rich C1 domain family protein		TraesCS7A02G388100_7	chr3A	495093707	495093877	NAD(P)H-quinone oxidoreductase subunit 2, chloroplastic
T4000970	TraesCS1A02G088000	chr1A	87576489	87585610	Serine/threonine-protein phosphatase		TraesCS3A02G393200_2	chr3A	641012141	641013235	Heat shock transcription factor
T4000997	TraesCS1A02G090400	chr1A	92509125	92512368	Phenazine biosynthesis PhzC/PhzF family protein		TraesCSU02G267100_2	chr3A	672900767	672900943	Argininosuccinate synthase
T4001023	TraesCS1A02G092800	chr1A	97677333	97678575	Desiccation-related protein PCC13-62		TraesCS3A02G501500_2	chr3A	725566004	725566231	UPF0482 protein YnfB
T4001024	TraesCS1A02G092900	chr1A	97684072	97686489	40S ribosomal protein S4		TraesCS3A02G501500_3	chr3A	725608335	725608562	UPF0482 protein YnfB
T4001055	TraesCS1A02G096200	chr1A	104247472	104253010	Fatty acid oxidation complex subunit alpha		TraesCS3A02G508500_2	chr3A	729681352	729682092	UDP-glycosyltransferase
T4001078	TraesCSU02G241300	chr1A	107548124	107548606	Pentatricopeptide repeat (PPR) superfamily protein		TraesCSU02G256000_2	chr3A	738582118	738582765	Receptor-like protein kinase
T4001079	TraesCS2B02G283000	chr1A	107564764	107566341	ATP synthase subunit alpha		TraesCS5D02G458500_2	chr3B	101908485	101908708	myo-inositol oxygenase 5
T4001080	TraesCS1A02G098200	chr1A	107583014	107583268	NADH-ubiquinone oxidoreductase chain 5		TraesCS1A02G385100_2	chr3B	101923697	101923870	Cytochrome c-550
T4001081	TraesCS7A02G164700	chr1A	107689957	107690463	Cytochrome c oxidase subunit 1		TraesCS7B02G046600_2	chr3B	201514533	201514649	Photosystem II reaction center protein T
T4001085	TraesCSU02G241300	chr1A	107773024	107773506	Pentatricopeptide repeat (PPR) superfamily protein		TraesCSU02G035400_2	chr3B	201515740	201515871	Protein PsbN
T4001086	TraesCSU02G170800	chr1A	107777245	107777499	BnaCnng55980D protein		TraesCSU02G254600_5	chr3B	201547420	201547620	Protein kinase superfamily protein
T4001087	TraesCS6D02G201100	chr1A	107777937	107778509	NADH dehydrogenase subunit 9		TraesCS3B02G563300_2	chr3B	796327855	796327959	Photosystem II reaction center protein M
T4001124	TraesCS1A02G101900	chr1A	111154496	111156619	Mitochondrial 37S ribosomal protein S27		TraesCS3D02G100300_2	chr3D	52814823	52815356	zinc finger MYM-type-like protein
T4001125	TraesCS1A02G102000	chr1A	111157282	111157548	Protein kinase superfamily protein		TraesCS6D02G354900_6	chr3D	134553455	134553937	tryptophan aminotransferase related 2
T4001126	TraesCS1A02G102100	chr1A	111157793	111158800	Harpin inducing protein		TraesCS6D02G354900_7	chr3D	558742921	558743402	tryptophan aminotransferase related 2
T4001139	TraesCSU02G210700	chr1A	112535896	112537020	F-box family protein		TraesCS6D02G080000_4	chr3D	589280718	589280958	30S ribosomal protein S19, chloroplastic
T4001140	TraesCSU02G210700	chr1A	112555722	112556846	F-box family protein		TraesCS7A02G388100_8	chr4A	583863725	583863895	NAD(P)H-quinone oxidoreductase subunit 2, chloroplastic
T4001149	TraesCS5A02G013900	chr1A	113024151	113025490	Chaperone protein ClpB 1		TraesCS4A02G273900_2	chr4A	584111584	584111871	Cysteine protease, putative
T4001222	TraesCS1A02G112200	chr1A	127540664	127543653	Kinase interacting (KIP1-like) family protein		TraesCS4A02G275800_2	chr4A	584734249	584735088	Lipoxygenase
T4001327	TraesCS1A02G124100	chr1A	159865450	159866367	PRA1 family protein		TraesCS4A02G343000_2	chr4A	622484486	622485103	Splicing factor 3B subunit 1
T4001455	TraesCS7A02G175800	chr1A	235422759	235425142	Protein curvature thylakoid chloroplastic-like		TraesCSU02G246200_2	chr4A	672654690	672655860	PHD finger alfin-like protein
T4001476	TraesCS1A02G138800	chr1A	249993119	249997868	ATP synthase gamma chain		TraesCS4A02G433600_2	chr4A	704250171	704250623	UBX domain-containing protein
T4001505	TraesCSU02G205200	chr1A	258018874	258022117	Disease resistance protein RPM1		TraesCS4A02G473100_2	chr4A	733118532	733118717	cyclin delta-3
T4001507	TraesCSU02G084100	chr1A	258104964	258106370	Disease resistance protein RPM1		TraesCS4A02G473100_3	chr4A	733240729	733240914	cyclin delta-3
T4001508	TraesCSU02G168400	chr1A	258109336	258113316	Disease resistance protein RPP13		TraesCS4B02G011500_2	chr4B	7476641	7479538	Histidine-containing phosphotransfer protein
T4001549	TraesCS1A02G146500	chr1A	269448898	269450247	F-box family protein		TraesCSU02G231200_2	chr4B	19199041	19199406	glucan synthase-like 4
T4001550	TraesCS1A02G146500	chr1A	269457073	269458422	F-box family protein		TraesCSU02G267100_3	chr4B	92476565	92476741	Argininosuccinate synthase
T4001632	TraesCS4A02G157800	chr1A	288565325	288566062	PQ-loop repeat family protein / transmembrane family protein		TraesCS6D02G354900_8	chr4D	379344448	379344929	tryptophan aminotransferase related 2
T4001690	TraesCS1B02G176200	chr1A	307861698	307863392	Pentatricopeptide repeat-containing protein		TraesCSU02G261200_2	chr4D	477402397	477402811	Urease subunit alpha
T4001714	TraesCS1A02G162500	chr1A	312811304	312812433	GRAM domain-containing protein / ABA-responsive protein-related		TraesCS1B02G123700_2	chr5A	22977431	22978686	ubiquitin-conjugating enzyme 33
T4001718	TraesCS7D02G211600	chr1A	314496567	314497538	Glycosyltransferase		TraesCS5A02G229800_2	chr5A	445226881	445227531	Beta purothionin
T4001745	TraesCS1A02G166300	chr1A	319813728	319814435	Plant basic secretory family protein		TraesCS3B02G188600_2	chr5A	482022811	482023002	50S ribosomal protein L32, chloroplastic
T4001835	TraesCS1A02G175300	chr1A	335252505	335253079	stress response NST1-like protein		TraesCS4B02G113000_2	chr5A	603379359	603380152	Ribose-phosphate pyrophosphokinase
T4001897	TraesCS1A02G182000	chr1A	349896673	349900133	DNA ligase-like protein		TraesCSU02G272200_2	chr5B	130609143	130609439	NADH dehydrogenase subunit 2
T4001904	TraesCS1A02G182800	chr1A	353224513	353228337	HIT zinc finger family protein, expressed		TraesCS7B02G381100_2	chr5B	394252957	394254367	Tetratricopeptide repeat (TPR)-like superfamily protein
T4001942	TraesCS1A02G186700	chr1A	360114539	360115676	Glutathione S-transferase		TraesCS3B02G186800_2	chr5B	473662762	473662884	wound-responsive family protein
T4001960	TraesCS1A02G188300	chr1A	362651141	362651464	elongation factor Ts family protein		TraesCS5B02G443700_2	chr5B	616322233	616322730	Pathogenesis-related protein 1
T4001986	TraesCS1A02G190800	chr1A	368068747	368077080	Fatty acid oxidation complex subunit alpha		TraesCS5B02G504200_2	chr5B	670305024	670305619	GYF domain protein
T4002029	TraesCS1A02G196000	chr1A	376793087	376795306	Chalcone-flavanone isomerase family protein		TraesCS7B02G046600_3	chr5D	6200271	6200388	Photosystem II reaction center protein T
T4002062	TraesCS1A02G199500	chr1A	380655788	380658952	E2 ubiquitin-conjugating-like enzyme		TraesCS5D02G010100_2	chr5D	6216982	6217092	Photosystem I reaction center subunit VIII
T4002063	TraesCS1A02G199400	chr1A	380849917	380850795	Expansin-like protein		TraesCS6D02G354900_9	chr5D	58662126	58662607	tryptophan aminotransferase related 2
T4002077	TraesCS1A02G201000	chr1A	384669619	384673054	Protoheme IX farnesyltransferase		TraesCS6D02G354900_10	chr5D	172017135	172017616	tryptophan aminotransferase related 2
T4002093	TraesCS1A02G202400	chr1A	386507203	386508468	Werner Syndrome-like exonuclease		TraesCS6D02G354900_11	chr5D	214356605	214357086	tryptophan aminotransferase related 2
T4002094	TraesCS1A02G202500	chr1A	386594914	386598860	two-component response regulator		TraesCS5A02G180900_2	chr5D	287443141	287443946	Leucine-rich repeat protein kinase family protein
T4002095	TraesCS1A02G202600	chr1A	386688296	386690524	Carboxypeptidase		TraesCS7D02G256300_2	chr5D	299970268	299970531	ATP synthase subunit b, chloroplastic
T4002114	TraesCSU02G094700	chr1A	389509832	389510960	DUF241 domain protein (DUF241)		TraesCSU02G265200_2	chr5D	483805008	483805223	Disease resistance protein (TIR-NBS-LRR class)
T4002115	TraesCSU02G094700	chr1A	389532686	389533814	DUF241 domain protein (DUF241)		TraesCSU02G229000_2	chr5D	493716553	493717122	Ripening related protein family
T4002123	TraesCS1A02G204800	chr1A	390350901	390353083	NAD kinase 1		TraesCSU02G229000_3	chr5D	493719037	493719606	Ripening related protein family
T4002127	TraesCS1A02G205100	chr1A	390775535	390777659	RING/U-box superfamily protein		TraesCS6D02G080000_5	chr5D	503216801	503217041	30S ribosomal protein S19, chloroplastic
T4002176	TraesCS1A02G209800	chr1A	395910277	395910711	Cortical cell-delineating protein		TraesCSU02G270400_3	chr5D	503228062	503228316	Methionine--tRNA ligase
T4002216	TraesCS7A02G225700	chr1A	400726822	400728187	AT hook motif DNA-binding family protein		TraesCSU02G270400_4	chr5D	503237841	503238095	Methionine--tRNA ligase
T4002218	TraesCS1A02G213400	chr1A	400796140	400800425	S-adenosyl-L-methionine-dependent methyltransferases superfamily protein		TraesCSU02G267100_4	chr5D	503241854	503242030	Argininosuccinate synthase
T4002263	TraesCS2A02G558000	chr1A	410664060	410664738	Chitinase		TraesCSU02G270400_5	chr5D	503268234	503268488	Methionine--tRNA ligase
T4002347	TraesCS1D02G203800	chr1A	421552609	421553076	Dynein light chain		TraesCS5D02G497500_2	chr5D	527601501	527603141	F-box domain containing protein
T4002368	TraesCS1A02G228400	chr1A	425137526	425138956	basic pentacysteine 7		TraesCS6D02G354900_12	chr5D	548974894	548975375	tryptophan aminotransferase related 2
T4002370	TraesCS1A02G228500	chr1A	425259805	425261160	RING/U-box superfamily protein, putative		TraesCS3B02G186800_3	chr5D	554200608	554200730	wound-responsive family protein
T4002386	TraesCS1A02G229800	chr1A	427684565	427686090	Phytochrome A-associated F-box protein		TraesCS5D02G551600_2	chr5D	564737712	564738282	PHD finger family protein
T4002401	TraesCS1A02G232000	chr1A	430856238	430861607	Thiamin pyrophosphokinase 1		TraesCS6A02G018800_2	chr6A	9104468	9108041	Ripening related protein family
T4002403	TraesCS1A02G231900	chr1A	430956865	430957549	UTP--glucose-1-phosphate uridylyltransferase		TraesCS6A02G018900_2	chr6A	9104783	9105037	Ripening-related protein
T4002405	TraesCS1A02G231800	chr1A	430971426	430972449	Chaperone protein DnaK		TraesCS6A02G018900_3	chr6A	9107787	9108041	Ripening-related protein
T4002406	TraesCS1A02G231900	chr1A	430972831	430973515	UTP--glucose-1-phosphate uridylyltransferase		TraesCS6A02G018900_4	chr6A	9116798	9117052	Ripening-related protein
T4002407	TraesCS1A02G232000	chr1A	430974587	430979956	Thiamin pyrophosphokinase 1		TraesCS6A02G018900_5	chr6A	9119801	9120055	Ripening-related protein
T4002408	TraesCS1A02G231800	chr1A	430988493	430989516	Chaperone protein DnaK		TraesCS3A02G198500_2	chr6A	435767991	435768443	Disease resistance protein (CC-NBS-LRR class) family
T4002409	TraesCS1A02G231900	chr1A	430989898	430990582	UTP--glucose-1-phosphate uridylyltransferase		TraesCS5A02G412600_2	chr6A	555578010	555578538	Ubiquitinyl hydrolase 1
T4002410	TraesCS1A02G231800	chr1A	431000318	431001341	Chaperone protein DnaK		TraesCS6A02G328000_2	chr6A	561589858	561590911	P-loop containing nucleoside triphosphate hydrolases superfamily protein
T4002411	TraesCS1A02G231900	chr1A	431001723	431002407	UTP--glucose-1-phosphate uridylyltransferase		TraesCS6A02G348600_2	chr6A	581437353	581438180	Cysteine--tRNA ligase
T4002412	TraesCS1A02G232000	chr1A	431003479	431008848	Thiamin pyrophosphokinase 1		TraesCSU02G264000_2	chr6A	611033230	611033463	Tesmin/TSO1-like CXC domain containing protein
T4002431	TraesCS1A02G234500	chr1A	435093683	435098995	Methyladenine glycosylase protein-like		TraesCS6A02G408800_2	chr6A	613322707	613324371	Receptor-like protein kinase
T4002438	TraesCS1A02G234500	chr1A	435478256	435483568	Methyladenine glycosylase protein-like		TraesCS5D02G559600_2	chr6B	22427004	22427135	Protein PsbN
T4002443	TraesCS5A02G234000	chr1A	441169388	441169909	CAP (Cysteine-rich secretory proteins, Antigen 5, and Pathogenesis-related 1 protein) superfamily protein		TraesCS7A02G388100_9	chr6B	450089196	450089366	NAD(P)H-quinone oxidoreductase subunit 2, chloroplastic
T4002458	TraesCS1A02G236300	chr1A	444795328	444795477	Transmembrane protein B169L		TraesCS6B02G379900_2	chr6B	654878858	654879304	Cysteine protease, putative
T4002467	TraesCS2A02G425100	chr1A	447589023	447593153	Kaurene synthase		TraesCS7B02G331900_2	chr6B	720982345	720985033	U-box domain-containing protein 62
T4002469	TraesCS2A02G424900	chr1A	447596129	447599089	Ribosome maturation protein SBDS		TraesCS6D02G048000_2	chr6D	22566950	22567314	IQ-domain 19
T4002473	TraesCS1A02G237600	chr1A	449144779	449145763	Defensin		TraesCS6D02G080000_6	chr6D	168252941	168253181	30S ribosomal protein S19, chloroplastic
T4002478	TraesCS6B02G107800	chr1A	449895438	449895659	Chymotrypsin inhibitor		TraesCS7A02G388100_10	chr6D	168261878	168262048	NAD(P)H-quinone oxidoreductase subunit 2, chloroplastic
T4002479	TraesCS6B02G107800	chr1A	449952715	449952936	Chymotrypsin inhibitor		TraesCSU02G267100_5	chr6D	389253747	389253923	Argininosuccinate synthase
T4002502	TraesCS1A02G241000	chr1A	454400870	454404510	7-hydroxymethyl chlorophyll a reductase, chloroplastic-like protein		TraesCS7A02G388100_11	chr6D	458919524	458919694	NAD(P)H-quinone oxidoreductase subunit 2, chloroplastic
T4002539	TraesCS1A02G244500	chr1A	458580115	458580627	Myb-like transcription factor-like		TraesCS3A02G198500_3	chr7A	15532285	15532737	Disease resistance protein (CC-NBS-LRR class) family
T4002566	TraesCS1A02G247100	chr1A	464518359	464520985	Isoamylase-like glucan debranching enzyme		TraesCS7A02G036900_2	chr7A	16636904	16637119	Powder tolerance-related protein
T4002579	TraesCS1A02G248000	chr1A	466747643	466747954	DNA-directed RNA polymerase subunit beta'		TraesCS5B02G558400_2	chr7A	18279914	18280444	Chromosome partition protein MukB
T4002597	TraesCS1A02G249800	chr1A	468478095	468481022	Endo-1,3;1,4-beta-D-glucanase		TraesCS7A02G082600_2	chr7A	47607270	47607874	Receptor-like protein kinase
T4002603	TraesCS1A02G250100	chr1A	468696145	468698440	Endo-1,31,4-beta-D-glucanase		TraesCS7B02G482500_2	chr7A	85339749	85340021	Ribosomal RNA small subunit methyltransferase G
T4002604	TraesCS1A02G250200	chr1A	468700110	468701463	Sulfotransferase		TraesCS7A02G388100_12	chr7A	563513257	563513427	NAD(P)H-quinone oxidoreductase subunit 2, chloroplastic
T4002655	TraesCS1D02G255600	chr1A	475889872	475892786	RAN GTPase activating protein 2		TraesCS7A02G388100_13	chr7A	563580534	563580704	NAD(P)H-quinone oxidoreductase subunit 2, chloroplastic
T4002706	TraesCS1A02G260600	chr1A	482474396	482476799	F-box domain containing protein		TraesCS7A02G388100_14	chr7A	563583781	563583951	NAD(P)H-quinone oxidoreductase subunit 2, chloroplastic
T4002725	TraesCS4A02G231600	chr1A	485597029	485600055	BSD domain containing protein, expressed		TraesCS7A02G390000_2	chr7A	566282414	566282912	extracellular ligand-gated ion channel protein (DUF3537)
T4002738	TraesCS1A02G263700	chr1A	487239336	487241306	NAC domain-containing protein		TraesCS7A02G390000_3	chr7A	566294995	566295493	extracellular ligand-gated ion channel protein (DUF3537)
T4002741	TraesCS1A02G264200	chr1A	487380240	487383821	Required to maintain repression 2		TraesCS7A02G390000_4	chr7A	566306123	566306621	extracellular ligand-gated ion channel protein (DUF3537)
T4002756	TraesCS1A02G265300	chr1A	489480872	489481637	Wound-induced protease inhibitor		TraesCS7A02G390000_5	chr7A	566318155	566318653	extracellular ligand-gated ion channel protein (DUF3537)
T4002757	TraesCS1A02G265300	chr1A	489494191	489494956	Wound-induced protease inhibitor		TraesCS7A02G390000_6	chr7A	566330791	566331289	extracellular ligand-gated ion channel protein (DUF3537)
T4002766	TraesCS1A02G266100	chr1A	490143544	490145998	Phospholipase A1		TraesCS7A02G397100_2	chr7A	576061949	576062365	Disease resistance protein (TIR-NBS-LRR class) family
T4002790	TraesCS1A02G268900	chr1A	492161616	492163530	Alpha/beta-Hydrolases superfamily protein		TraesCS4B02G238200_2	chr7A	638508643	638508876	Photosystem I reaction center subunit IV
T4002832	TraesCS1A02G272700	chr1A	494993575	494996050	rRNA N-glycosidase		TraesCS7A02G489100_2	chr7A	679377871	679379007	Aspartic proteinase nepenthesin-2
T4002879	TraesCS1A02G277600	chr1A	502350970	502353481	Protein BUD31		TraesCS3B02G510700_2	chr7A	692046201	692047444	Coatomer, beta' subunit
T4002955	TraesCS1A02G286400	chr1A	513032759	513034380	HXXXD-type acyl-transferase family protein		TraesCS7B02G212800_2	chr7B	388814795	388815315	ELMO domain containing protein
T4002967	TraesCS1A02G287900	chr1A	515214920	515216612	Kinase family protein		TraesCS7B02G279200_2	chr7B	511925272	511925604	Ankyrin repeat protein-like
T4002974	TraesCS1A02G288200	chr1A	515630650	515634032	Serine/threonine-protein kinase ATM		TraesCS4B02G124900_2	chr7B	622430716	622430988	30S ribosomal protein S15
T4003202	TraesCS7B02G148300	chr1A	535842411	535846657	WD40 domain-containing protein		TraesCS7B02G497000_2	chr7B	747627207	747627437	Inhibitor protein
T4003256	TraesCS2D02G457800	chr1A	541328415	541332430	RING/U-box superfamily protein		TraesCS7D02G020071_2	chr7D	8660292	8660453
T4003257	TraesCS1A02G318400	chr1A	541372055	541373473	Peroxidase		TraesCS7D02G020071_3	chr7D	8683160	8683321
T4003277	TraesCS1A02G320000	chr1A	542623732	542625514	2-oxoglutarate (2OG) and Fe(II)-dependent oxygenase superfamily protein		TraesCS7D02G020071_4	chr7D	8706666	8706827
T4003279	TraesCSU02G224100	chr1A	542664468	542666482	Wall-associated receptor kinase 1		TraesCSU02G254600_6	chr7D	231570449	231570649	Protein kinase superfamily protein
T4003295	TraesCS1A02G321400	chr1A	543970518	543971598	Peptidyl-tRNA hydrolase		TraesCS4B02G124900_3	chr7D	231582596	231582868	30S ribosomal protein S15
T4003325	TraesCS1A02G324700	chr1A	547444005	547445335	Actin cross-linking protein, putative		TraesCS6D02G354900_13	chr7D	561555013	561555494	tryptophan aminotransferase related 2
T4003329	TraesCS1A02G324700	chr1A	547742426	547743756	Actin cross-linking protein, putative
T4003346	TraesCS1A02G326200	chr1A	549374132	549378559	Lipoyl synthase, chloroplastic
T4003372	TraesCS1A02G328600	chr1A	550368088	550373694	30S ribosomal protein S19
T4003401	TraesCS1A02G331300	chr1A	553569923	553575215	2-oxoglutarate (2OG) and Fe(II)-dependent oxygenase superfamily protein
T4003402	TraesCS1A02G331400	chr1A	553640984	553642582	2-oxoglutarate (2OG) and Fe(II)-dependent oxygenase superfamily protein
T4003460	TraesCS1A02G337100	chr1A	560183150	560184744	F-box domain containing protein
T4003466	TraesCS1A02G337400	chr1A	560537523	560539114	Glycosyltransferase
T4003469	TraesCS3D02G387000	chr1A	561462380	561462748	Orf101b
T4003505	TraesCS1A02G341900	chr1A	565288384	565291243	IQ domain-containing protein
T4003549	TraesCS1A02G346100	chr1A	567109174	567112470	Mediator of RNA polymerase II transcription subunit 15a
T4003586	TraesCS1A02G349400	chr1A	569372849	569373229	Glutathione S-transferase T3
T4003587	TraesCS1A02G349700	chr1A	569511280	569511915	Divalent ion symporter
T4003601	TraesCS1A02G351200	chr1A	570346317	570347447	ATP-dependent RNA helicase
T4003603	TraesCS1A02G351300	chr1A	570476186	570477112	Rapid alkalinization factor (RALF) family protein
T4003607	TraesCS1A02G351700	chr1A	571006988	571008001	F-box domain containing protein
T4003650	TraesCS1D02G164100	chr1A	573908969	573914262	Myosin heavy chain-related protein, putative
T4003656	TraesCS1A02G356300	chr1A	574478873	574481733	Serine/threonine-protein kinase
T4003660	TraesCS1A02G356600	chr1A	574818604	574821973	Serine/threonine-protein kinase
T4003661	TraesCS1A02G356600	chr1A	574835620	574838989	Serine/threonine-protein kinase
T4003666	TraesCS1A02G357000	chr1A	575119348	575119680	F-box/RNI-like superfamily protein
T4003677	TraesCS1D02G362800	chr1A	575428169	575430409	Ras-like protein
T4003679	TraesCS1A02G357800	chr1A	575780150	575781831	AP2-like ethylene-responsive transcription factor
T4003743	TraesCS1A02G364300	chr1A	580180682	580181670	Late embryogenesis abundant protein
T4003774	TraesCS1A02G368200	chr1A	582516216	582517124	Transcription initiation factor IIB
T4003784	TraesCSU02G167700	chr1A	583587942	583589167	Chlorophyll a-b binding protein, chloroplastic
T4003789	TraesCS4A02G044000	chr1A	583805509	583807997	Cytochrome b561 and DOMON domain-containing protein
T4003797	TraesCS1A02G370300	chr1A	584212838	584221103	Receptor-like protein kinase
T4003845	TraesCS1A02G373400	chr1A	586771930	586773163	DNA topoisomerase 3-alpha
T4003940	TraesCS3B02G563300	chr1A	591959450	591959554	Photosystem II reaction center protein M
T4003941	TraesCS6D02G057600	chr1A	591970401	591970595	Photosystem II reaction center protein K
T4003942	TraesCSU02G272400	chr1A	591970990	591971100	Photosystem II reaction center protein I
T4003943	TraesCS3B02G563300	chr1A	591980251	591980355	Photosystem II reaction center protein M
T4003944	TraesCS5D02G458500	chr1A	591985792	591986015	myo-inositol oxygenase 5
T4003946	TraesCSU02G269100	chr1A	591994845	591995066	Photosystem II reaction center protein H
T4003947	TraesCSU02G035400	chr1A	591995170	591995301	Protein PsbN
T4003948	TraesCS7B02G046600	chr1A	591995350	591995466	Photosystem II reaction center protein T
T4003949	TraesCSU02G268900	chr1A	592000544	592000796	50S ribosomal protein L33
T4003950	TraesCSU02G268800	chr1A	592001197	592001325	Photosystem I reaction center subunit IX
T4003952	TraesCSU02G258700	chr1A	592002391	592002486	Cytochrome b6-f complex subunit 6
T4003953	TraesCS3B02G186800	chr1A	592002529	592002651	wound-responsive family protein
T4003955	TraesCSU02G259200	chr1A	592003915	592004034	Cytochrome b559 subunit beta
T4003957	TraesCSU02G272300	chr1A	592004278	592004421	Photosystem II reaction center protein J
T4003959	TraesCS7A02G388100	chr1A	592051535	592051705	NAD(P)H-quinone oxidoreductase subunit 2, chloroplastic
T4003962	TraesCS6D02G057600	chr1A	592061844	592062038	Photosystem II reaction center protein K
T4003963	TraesCSU02G272400	chr1A	592062432	592062542	Photosystem II reaction center protein I
T4003966	TraesCSU02G259200	chr1A	592068091	592068210	Cytochrome b559 subunit beta
T4003967	TraesCS5B02G380100	chr1A	592068233	592068349	Photosystem II reaction center protein L
T4003968	TraesCSU02G272300	chr1A	592068454	592068597	Photosystem II reaction center protein J
T4003969	TraesCS5D02G010100	chr1A	592072667	592072777	Photosystem I reaction center subunit VIII
T4003970	TraesCS5D02G458500	chr1A	592078865	592079090	myo-inositol oxygenase 5
T4003972	TraesCS7D02G256300	chr1A	592090481	592090744	ATP synthase subunit b, chloroplastic
T4003973	TraesCS2B02G487300	chr1A	592092944	592093255	30S ribosomal protein S14
T4003974	TraesCS6D02G080000	chr1A	592112614	592112854	30S ribosomal protein S19, chloroplastic
T4003975	TraesCS2D02G264000	chr1A	592113175	592113672	50S ribosomal protein L2
T4003976	TraesCS2D02G263900	chr1A	592113281	592113694	sulfate transporter 91
T4003979	TraesCS3B02G125800	chr1A	592115529	592116098	Protein Ycf2
T4003980	TraesCS7A02G388100	chr1A	592118244	592118414	NAD(P)H-quinone oxidoreductase subunit 2, chloroplastic
T4004016	TraesCS1A02G389200	chr1A	595302949	595305932	Oxidoreductase
T4004065	TraesCS1A02G393700	chr1A	599046817	599050848	F-box domain containing protein
T4004082	TraesCS1A02G396300	chr1A	600623585	600623821	Cyst nematode resistance protein-like
T4004096	TraesCS1A02G397700	chr1A	601804865	601807087	transmembrane protein, putative (DUF594)
T4004113	TraesCS1A02G399400	chr1A	602518407	602522839	Wuschel-related homeobox protein, putative
T4004115	TraesCS1A02G399500	chr1A	602711007	602712163	Ethylene-responsive transcription factor
T4004192	TraesCS1A02G407100	chr1A	609101091	609104258	Prohibitin
T4004194	TraesCS4A02G343900	chr1A	609582289	609584697	GrpE protein homolog
T4004197	TraesCS6A02G233700	chr1A	609695617	609696545	Dof zinc finger protein
T4004198	TraesCS6A02G233600	chr1A	609699510	609699929	Major facilitator superfamily protein
T4004201	TraesCS4A02G344100	chr1A	610052169	610054770	O-methyltransferase
T4004232	TraesCS1A02G410700	chr1A	611868904	611869647	WRKY transcription factor
T4004233	TraesCS1A02G410800	chr1A	611870116	611871752	1-acyl-sn-glycerol-3-phosphate acyltransferase
T4004258	TraesCS1A02G413800	chr1A	613719036	613720484	DELLA protein GAI
T4004262	TraesCS5A02G234000	chr1A	613960529	613961050	CAP (Cysteine-rich secretory proteins, Antigen 5, and Pathogenesis-related 1 protein) superfamily protein
T4004275	TraesCS1A02G415000	chr1A	614782807	614783616	Allergen, putative
T4004276	TraesCS1A02G415100	chr1A	614875574	614876077	Oleosin family protein
T4004277	TraesCS1A02G415200	chr1A	614880005	614885166	Protein CHUP1, chloroplastic
T4004280	TraesCS1A02G415500	chr1A	614935369	614937519	ATP-dependent RNA helicase
T4004281	TraesCS1A02G415600	chr1A	614938552	614941123	F-box domain containing protein
T4004298	TraesCS1A02G417200	chr1A	615782959	615783532	F-box domain containing protein, expressed
T4004299	TraesCS1A02G417200	chr1A	615801349	615801922	F-box domain containing protein, expressed
T4004300	TraesCS1A02G417200	chr1A	615819739	615820312	F-box domain containing protein, expressed
T4004328	TraesCS3B02G457900	chr1A	617265123	617267107	RNA-binding protein
T4004329	TraesCS3B02G458000	chr1A	617268655	617269676	zinc finger (C3HC4-type RING finger) family protein
T4004343	TraesCS1A02G421100	chr1A	618356619	618356861	Transmembrane protein, putative
T4004382	TraesCS7A02G185600	chr1A	620979024	620980509	Eukaryotic aspartyl protease family protein, putative
T4004411	TraesCS1A02G426800	chr1A	623420434	623421630	Polypyrimidine tract-binding-like protein, putative
T4004422	TraesCS1A02G428100	chr1A	624109596	624112199	Acyl-protein thioesterase 2
T4004423	TraesCS1A02G428200	chr1A	624116903	624117727	F-box protein
T4004424	TraesCS1A02G428100	chr1A	624152697	624155300	Acyl-protein thioesterase 2
T4004425	TraesCS1A02G428200	chr1A	624160004	624160828	F-box protein
T4004497	TraesCS1A02G434600	chr1A	628048951	628049646	Cysteine-histidine-rich C1 domain family protein
T4004515	TraesCS1A02G437600	chr1A	629289647	629292043	2-aminoethanethiol dioxygenase
T4004579	TraesCS1A02G443000	chr1A	634194902	634198838	Tudor/PWWP/MBT superfamily protein
T4004675	TraesCS1B02G007300	chr1B	4626673	4629972	F-box/LRR-repeat protein
T4004679	TraesCSU02G226000	chr1B	4839042	4841657	rRNA N-glycosidase
T4004680	TraesCSU02G194900	chr1B	4845855	4846901	rRNA N-glycosidase
T4004681	TraesCSU02G226000	chr1B	4860289	4862904	rRNA N-glycosidase
T4004726	TraesCS1B02G011471	chr1B	5812746	5813015
T4004870	TraesCS1B02G025700	chr1B	13313778	13314020	Inhibitor protein
T4004882	TraesCS1B02G026600	chr1B	13713552	13716839	Aldo-keto reductase
T4004889	TraesCS1B02G026400	chr1B	14033553	14034533	Disease resistance protein RPM1
T4004899	TraesCSU02G002500	chr1B	14465149	14465391	Inhibitor protein
T4004901	TraesCSU02G002500	chr1B	14481932	14482174	Inhibitor protein
T4004930	TraesCS1B02G030100	chr1B	16343711	16345721	DNA repair and recombination protein RAD54-like
T4004944	TraesCS1B02G032400	chr1B	16910607	16911947	DUF868 family protein (DUF868)
T4004949	TraesCSU02G205600	chr1B	17094514	17095236	DNA-directed RNA polymerase subunit alpha
T4004950	TraesCSU02G205600	chr1B	17099569	17100291	DNA-directed RNA polymerase subunit alpha
T4005017	TraesCSU02G267500	chr1B	20226775	20227436	Defensin
T4005021	TraesCSU02G267500	chr1B	20692745	20693406	Defensin
T4005022	TraesCSU02G267500	chr1B	20790549	20791204	Defensin
T4005080	TraesCS3A02G083900	chr1B	27583359	27584556	Xyloglucan endotransglucosylase/hydrolase
T4005093	TraesCS4A02G006700	chr1B	28917505	28921056	Flavin-containing monooxygenase
T4005098	TraesCS1B02G047600	chr1B	29394756	29395600	AWPM-19-like membrane family protein
T4005139	TraesCS1B02G051200	chr1B	33387243	33387557	Powdery mildew resistance protein Pm3
T4005140	TraesCS1B02G051300	chr1B	33387653	33389539	NBS-LRR-like resistance protein
T4005207	TraesCS3B02G119800	chr1B	45378162	45381414	Pyruvate decarboxylase
T4005231	TraesCS1B02G060800	chr1B	50175848	50177504	Alpha/beta-Hydrolases superfamily protein
T4005246	TraesCS7A02G038300	chr1B	53064215	53075556	Patatin
T4005248	TraesCS1B02G062100	chr1B	53124953	53126497	UDP-glycosyltransferase
T4005249	TraesCS1B02G062200	chr1B	53128627	53130618	Receptor-like protein kinase
T4005251	TraesCS1B02G062400	chr1B	53155401	53156544	polyadenylate-binding protein 1-B-binding protein
T4005275	TraesCS1B02G064800	chr1B	55429420	55431435	Cytochrome P450
T4005279	TraesCS1A02G098300	chr1B	55919987	55921339	Cytochrome b559 subunit alpha
T4005293	TraesCS1B02G066200	chr1B	56399416	56399913	Protein FATTY ACID EXPORT 4, chloroplastic
T4005299	TraesCS1B02G066400	chr1B	57086566	57090543	Alcohol dehydrogenase, putative
T4005345	TraesCS1B02G070800	chr1B	62779028	62779829	Vitamin B12 transporter BtuB
T4005388	TraesCS1B02G074700	chr1B	65105641	65106813	F-box protein
T4005389	TraesCS4A02G219600	chr1B	65119239	65120282	Eukaryotic aspartyl protease family protein, expressed
T4005390	TraesCS1B02G074905	chr1B	65163751	65164713
T4005396	TraesCS1B02G076000	chr1B	65763846	65765682	F-box protein
T4005415	TraesCS1B02G077400	chr1B	67130890	67131726	cysteine-rich RLK (RECEPTOR-like protein kinase) 37
T4005453	TraesCS1B02G082000	chr1B	72295198	72295416	Photosystem II reaction center protein H
T4005456	TraesCS2A02G461600	chr1B	72508957	72513780	Gamma-soluble NSF attachment protein
T4005467	TraesCS1B02G083300	chr1B	74354334	74356056	Sexual differentiation process protein isp7
T4005482	TraesCS1B02G084563	chr1B	76274382	76275122
T4005493	TraesCS1B02G084584	chr1B	76895319	76895780
T4005494	TraesCS1B02G084584	chr1B	76924723	76925184
T4005506	TraesCS6A02G305900	chr1B	77817259	77817750	binding protein
T4005514	TraesCS1B02G086900	chr1B	84061352	84062288	DUF674 family protein
T4005521	TraesCS3B02G188600	chr1B	91556789	91556980	50S ribosomal protein L32, chloroplastic
T4005522	TraesCSU02G270000	chr1B	91560597	91560842	Photosystem I iron-sulfur center
T4005523	TraesCS4B02G000100	chr1B	91561181	91561639	NADH-quinone oxidoreductase subunit K
T4005541	TraesCS1B02G089300	chr1B	97367273	97368954	AMP-dependent synthetase and ligase family protein
T4005554	TraesCS1B02G090000	chr1B	98769708	98771819	Mitochondrial pyruvate carrier
T4005555	TraesCS1B02G090100	chr1B	98775579	98776751	Receptor-like protein kinase
T4005556	TraesCS1B02G090200	chr1B	98776785	98779568	Wall-associated receptor kinase 2
T4005599	TraesCS1B02G095000	chr1B	106735156	106738018	Dentin sialophosphoprotein-related, putative isoform 1
T4005607	TraesCS1B02G095600	chr1B	108053880	108056455	Protein phosphatase 2C-like protein
T4005723	TraesCS1B02G107300	chr1B	128629698	128631526	Agmatine coumaroyltransferase-1
T4005732	TraesCS1B02G108100	chr1B	129885039	129889154	CRS1/YhbY (CRM) domain protein
T4005739	TraesCS1B02G109300	chr1B	130427387	130429336	Nodulin-like / Major Facilitator Superfamily protein
T4005741	TraesCS5B02G258300	chr1B	130688644	130692021	PP2A regulatory subunit TAP46
T4005755	TraesCSU02G164600	chr1B	134115926	134117309	Lectin receptor kinase
T4005774	TraesCS1B02G112100	chr1B	139297167	139297484	NBS-LRR disease resistance protein-like protein
T4005782	TraesCS1B02G112900	chr1B	140955133	140962474	Transcription factor basic helix-loop-helix
T4005795	TraesCS1B02G113900	chr1B	143202763	143202978	ATP-dependent helicase/deoxyribonuclease subunit B
T4005796	TraesCS1B02G113700	chr1B	143227495	143228603	Glutathione S-transferase
T4005806	TraesCS1D02G153000	chr1B	145145780	145146356	Cytochrome c oxidase subunit 1
T4005848	TraesCS1B02G118700	chr1B	149984974	149985510	RING/U-box superfamily protein, putative
T4005849	TraesCS1B02G118800	chr1B	149985967	149988020	RING/U-box superfamily protein, putative
T4005855	TraesCS5B02G380100	chr1B	151994841	151994957	Photosystem II reaction center protein L
T4005879	TraesCS1B02G121800	chr1B	155382689	155383992	BTB/POZ and MATH domain-containing protein 2
T4005892	TraesCS1B02G123000	chr1B	157912919	157920594	Gamma-tubulin complex component
T4005893	TraesCS1B02G122900	chr1B	157912935	157913723	LURP-one-like protein
T4005895	TraesCS7B02G194400	chr1B	158262229	158263261	Tubulin alpha chain
T4005927	TraesCS1B02G125600	chr1B	162780876	162785151	DNA-directed RNA polymerase subunit beta'
T4005928	TraesCS1B02G125600	chr1B	162809988	162814261	DNA-directed RNA polymerase subunit beta'
T4005937	TraesCS5B02G034100	chr1B	164254796	164255609	glutamate receptor 3
T4005959	TraesCS4D02G119200	chr1B	167192277	167196858	Elongation factor P
T4005960	TraesCS4D02G119300	chr1B	167196691	167200674	Chloroplastic outer envelope membrane protein, putative, expressed
T4005961	TraesCS4D02G119400	chr1B	167201604	167205916	Vacuolar sorting receptor family protein
T4005980	TraesCS1B02G129700	chr1B	170461497	170462091	calcium-dependent lipid-binding family protein
T4005997	TraesCS1D02G112900	chr1B	175540330	175541203	DUF4228 domain protein
T4006003	TraesCS1B02G132100	chr1B	176327320	176331129	Haloacid dehalogenase-like hydrolase superfamily protein
T4006004	TraesCS1B02G132100	chr1B	176334635	176338444	Haloacid dehalogenase-like hydrolase superfamily protein
T4006005	TraesCS1B02G132100	chr1B	176373714	176377523	Haloacid dehalogenase-like hydrolase superfamily protein
T4006064	TraesCS1B02G137700	chr1B	188323055	188326824	Phototropic-responsive NPH3 family protein
T4006077	TraesCS1B02G138800	chr1B	192183794	192184999	Pimeloyl-[acyl-carrier protein] methyl ester esterase
T4006081	TraesCSU02G068500	chr1B	193216631	193218740	RNA-binding protein, putative
T4006111	TraesCSU02G272100	chr1B	202435292	202435555	Major facilitator superfamily protein
T4006140	TraesCS6A02G304300	chr1B	210107594	210109943	RING-finger E3 ubiquitin ligase, putative
T4006169	TraesCS1B02G147900	chr1B	226729712	226730257	Pectinesterase inhibitor
T4006217	TraesCS3A02G163400	chr1B	264595687	264596569	transmembrane protein
T4006251	TraesCS1B02G086400	chr1B	279284077	279284873	Peptide methionine sulfoxide reductase MsrB
T4006285	TraesCS1B02G158700	chr1B	285176478	285176747	Tyrosine--tRNA ligase 1
T4006298	TraesCS3B02G164400	chr1B	289456818	289457198	glutathione S-transferase THETA 3
T4006301	TraesCS7B02G469300	chr1B	291272398	291273618	Sec23/sec24 transport family protein
T4006319	TraesCS1A02G108900	chr1B	296927063	296932008	Protein VERNALIZATION INSENSITIVE 3
T4006371	TraesCS1B02G166600	chr1B	311389948	311390643	UvrABC system protein C
T4006404	TraesCS1B02G170100	chr1B	321130852	321132404	Ribonuclease
T4006412	TraesCSU02G267400	chr1B	322027297	322027560	GRF zinc finger family protein
T4006420	TraesCS1D02G450500	chr1B	323910169	323911422	STE20-like serine/threonine-protein kinase
T4006460	TraesCS1B02G175500	chr1B	335972890	335973762	acetyl-CoA carboxylase 2
T4006488	TraesCS1B02G178000	chr1B	342018567	342019947	Histone H1
T4006489	TraesCS1B02G178200	chr1B	342026597	342029165	Zinc finger protein 346
T4006508	TraesCS1B02G179800	chr1B	345773122	345774275	GRAM domain-containing protein / ABA-responsive protein-related
T4006561	TraesCS2B02G566900	chr1B	353539721	353540376	Serine/threonine-protein kinase
T4006562	TraesCS2B02G567000	chr1B	353541588	353546551	Serine/threonine-protein kinase
T4006563	TraesCS2B02G567100	chr1B	353548022	353552091	Serine/threonine-protein kinase
T4006598	TraesCS1B02G189000	chr1B	360063107	360065120	NADH-ubiquinone oxidoreductase chain 4
T4006658	TraesCS1B02G194100	chr1B	370119376	370120601	Glutathione S-transferase
T4006668	TraesCS1B02G195400	chr1B	370948766	370951603	Ubiquitin carboxyl-terminal hydrolase-like protein
T4006672	TraesCS1B02G195700	chr1B	371574985	371575970	Dehydration-responsive element binding factor protein
T4006675	TraesCS2B02G150900	chr1B	372561147	372562483	Glutaredoxin family protein, expressed
T4006702	TraesCSU02G195400	chr1B	377419079	377419691	RING/U-box superfamily protein
T4006763	TraesCS1B02G204800	chr1B	389708908	389710410	Pentatricopeptide repeat-containing protein
T4006766	TraesCS1B02G205100	chr1B	390066303	390068142	Cytochrome P450, putative
T4006776	TraesCS7D02G464300	chr1B	393708503	393708973	ATPase subunit 8
T4006846	TraesCS1B02G212900	chr1B	407300990	407303971	stress response protein
T4006857	TraesCS1B02G214700	chr1B	409842240	409843689	Protein curvature thylakoid chloroplastic-like
T4006915	TraesCS1B02G221100	chr1B	419026531	419028861	Silicon transporter
T4006924	TraesCS1B02G221700	chr1B	420065313	420065990	ARM repeat superfamily protein
T4006996	TraesCS7D02G175600	chr1B	432671792	432674099	12-oxophytodienoate reductase
T4007046	TraesCS7D02G256000	chr1B	441746891	441747139	Ras-related small GTP-binding family protein
T4007047	TraesCSU02G263800	chr1B	441747138	441747377	Vps51/Vps67 family (components of vesicular transport) protein
T4007048	TraesCSU02G254600	chr1B	441747771	441747971	Protein kinase superfamily protein
T4007094	TraesCS1B02G239500	chr1B	448537275	448537646	DNA-directed RNA polymerase subunit beta
T4007095	TraesCS1B02G239700	chr1B	448540399	448540560	NADH-ubiquinone oxidoreductase (Complex I), chain 5 carboxy-terminal protein
T4007097	TraesCS1B02G239800	chr1B	448747297	448747592	Metallothionein-like protein
T4007115	TraesCSU02G000100	chr1B	450165700	450168532	Chalcone synthase
T4007125	TraesCS1B02G242300	chr1B	450956720	450960657	Phosphatase 2C family protein
T4007165	TraesCS1B02G245500	chr1B	456148666	456149758	Late embryogenesis abundant (LEA) hydroxyproline-rich glycoprotein family
T4007167	TraesCS1B02G245700	chr1B	456354054	456354530	NRR repressor homolog 1
T4007173	TraesCS1B02G245900	chr1B	457056259	457057649	Heavy metal transport/detoxification superfamily protein, putative
T4007256	TraesCSU02G018900	chr1B	468490483	468491235	Polyubiquitin
T4007257	TraesCSU02G019000	chr1B	468494434	468495464	Heat-shock protein
T4007274	TraesCS1B02G254500	chr1B	471766395	471769669	Major facilitator superfamily protein
T4007275	TraesCS1B02G254600	chr1B	471770137	471777242	Carbon catabolite repressor protein 4
T4007289	TraesCS1B02G255900	chr1B	474502337	474508744	Beta-mannosidase, putative
T4007375	TraesCS1B02G264700	chr1B	489177781	489179619	transmembrane protein, putative (DUF247)
T4007420	TraesCS4B02G333900	chr1B	496990572	496992881	Non-canonical purine NTP pyrophosphatase
T4007483	TraesCS1B02G275800	chr1B	507606018	507606605	Dirigent protein
T4007490	TraesCS1B02G276300	chr1B	508495590	508496480	Wound-induced protease inhibitor
T4007503	TraesCS1B02G277600	chr1B	510184992	510185735	Multidrug resistance 3
T4007505	TraesCS1B02G277700	chr1B	510664129	510664623	PB1 domain-containing protein tyrosine kinase
T4007603	TraesCS5A02G279300	chr1B	525861387	525861689	GRF zinc finger family protein
T4007636	TraesCS3B02G320500	chr1B	533876689	533878801	Phosphotransferase
T4007674	TraesCS1B02G294100	chr1B	538301297	538302808	Two pore calcium channel protein 1
T4007675	TraesCS1B02G294200	chr1B	538328939	538331277	60S ribosomal protein L36
T4007713	TraesCS1B02G298600	chr1B	546731829	546732077	Glycerol-3-phosphate dehydrogenase
T4007714	TraesCS1B02G298700	chr1B	546733365	546734909	BTB/POZ domain-containing protein
T4007747	TraesCS6A02G092700	chr1B	549393740	549394150	U-box domain-containing protein kinase family protein
T4007776	TraesCS1B02G304800	chr1B	554118289	554119053	Phosphatidylethanolamine-binding protein
T4007783	TraesCS1B02G305300	chr1B	554777615	554780285	F-box family protein
T4007791	TraesCS6B02G153000	chr1B	556339286	556342900	NBS-LRR disease resistance protein
T4007799	TraesCS1B02G306600	chr1B	556795523	556796584	BTB/POZ domain containing protein, expressed
T4007802	TraesCS1B02G306900	chr1B	556860090	556860416	ribosomal protein 1
T4007839	TraesCS4B02G295400	chr1B	560546728	560548689	F-box domain containing protein
T4007840	TraesCS4B02G295300	chr1B	560550517	560551243	VQ motif family protein
T4007846	TraesCS1B02G310900	chr1B	561214453	561218692	WRKY transcription factor
T4007850	TraesCS1B02G311500	chr1B	562288049	562288649	Acetyl-coenzyme A carboxylase carboxyl transferase subunit beta, chloroplastic
T4007882	TraesCS1B02G315400	chr1B	566595072	566596216	Chloride channel protein
T4007883	TraesCS1B02G315437	chr1B	566618442	566619278
T4007888	TraesCS1B02G315800	chr1B	566925956	566926219	Protein kinase C-binding protein NELL2
T4007910	TraesCS1B02G317900	chr1B	569018662	569020714	F-box family protein
T4007941	TraesCS1B02G320600	chr1B	571678485	571679798	Disease resistance protein (NBS-LRR class) family
T4007950	TraesCSU02G137600	chr1B	572321545	572323327	Core-2/I-branching beta-1,6-N-acetylglucosaminyltransferase family protein
T4007951	TraesCSU02G137500	chr1B	572346537	572347370	Germin-like protein
T4008070	TraesCS1B02G334000	chr1B	588409530	588411070	SPOROCYTELESS-like EAR-containing protein 1
T4008071	TraesCS1B02G334000	chr1B	588427281	588428821	SPOROCYTELESS-like EAR-containing protein 1
T4008101	TraesCS1B02G336800	chr1B	591029752	591030767	Bifunctional glutamine synthetase adenylyltransferase/adenylyl-removing enzyme
T4008102	TraesCS1B02G336800	chr1B	591098799	591099814	Bifunctional glutamine synthetase adenylyltransferase/adenylyl-removing enzyme
T4008108	TraesCS1B02G337600	chr1B	592785419	592788282	ARM repeat superfamily protein
T4008117	TraesCS1B02G338200	chr1B	594168363	594168845	Translation initiation factor IF-2
T4008119	TraesCS1B02G338400	chr1B	594401264	594401515	alpha/beta-Hydrolases superfamily protein
T4008130	TraesCS1B02G339900	chr1B	595792011	595794277	Ribosomal protein L11 methyltransferase
T4008143	TraesCS1B02G340900	chr1B	597084897	597085214	DUF1677 family protein
T4008157	TraesCS1B02G342500	chr1B	598798139	598798948	Ethylene-responsive transcription factor
T4008199	TraesCS1B02G346600	chr1B	604288232	604292017	Cleavage stimulation factor subunit
T4008213	TraesCSU02G247100	chr1B	605758791	605759978	Cytochrome P450
T4008265	TraesCS6B02G207600	chr1B	612663360	612663656	NADH dehydrogenase subunit 2
T4008271	TraesCS1B02G353600	chr1B	612923926	612925690	P-loop containing nucleoside triphosphate hydrolases superfamily protein
T4008323	TraesCS1B02G358000	chr1B	617154814	617157231	F-box family protein
T4008395	TraesCS1B02G365900	chr1B	626827619	626828935	Thioesterase family protein
T4008396	TraesCS1B02G366000	chr1B	626830581	626832277	Disease resistance protein (NBS-LRR class) family
T4008437	TraesCS1B02G370400	chr1B	629779916	629780236	Small ubiquitin-related modifier
T4008523	TraesCS1B02G379500	chr1B	643290435	643291982	F-box family protein
T4008553	TraesCS1B02G382200	chr1B	645089589	645092224	Pectin lyase-like superfamily protein
T4008554	TraesCS1B02G382300	chr1B	645096545	645096939	Pectin lyase-like superfamily protein
T4008574	TraesCS1B02G384100	chr1B	647253755	647257853	Chaperone protein dnaJ, putative
T4008715	TraesCS4D02G057500	chr1B	661820870	661827388	AMSH-like ubiquitin thioesterase 1
T4008716	TraesCS4D02G057600	chr1B	661828664	661833415	GDP-mannose transporter
T4008717	TraesCS4D02G057700	chr1B	661834156	661835284	Epidermal patterning factor-like protein
T4008742	TraesCS1B02G401700	chr1B	663368890	663370372	Myb transcription factor
T4008789	TraesCS7A02G388100	chr1B	665270065	665270235	NAD(P)H-quinone oxidoreductase subunit 2, chloroplastic
T4008818	TraesCS1B02G409000	chr1B	668744316	668744888	Invertase/pectin methylesterase inhibitor family protein
T4008855	TraesCS3B02G059800	chr1B	670828599	670829057	GRF zinc finger family protein
T4008857	TraesCS1B02G412500	chr1B	671309365	671310955	DUF674 family protein
T4008927	TraesCS1B02G418900	chr1B	675524701	675526751	Tropinone reductase-like protein
T4008988	TraesCS5B02G250900	chr1B	682463807	682464070	Protein kinase C-binding protein NELL2
T4008993	TraesCS7B02G381100	chr1B	682789745	682791155	Tetratricopeptide repeat (TPR)-like superfamily protein
T4009030	TraesCS1B02G428500	chr1B	687356106	687357519	BTB/POZ domain containing protein
T4009039	TraesCS5B02G237600	chr1B	687721600	687721911	Calmodulin
T4009044	TraesCS1B02G429500	chr1B	687852265	687854033	Glycosyltransferase
T4009071	TraesCS1B02G431800	chr1B	690141993	690146694	RNA-binding protein Nova
T4009090	TraesCSU02G234500	chr1B	692842827	692843723	Subtilisin-like protease
T4009091	TraesCSU02G234500	chr1B	692848198	692849094	Subtilisin-like protease
T4009120	TraesCS1B02G436600	chr1B	694293659	694294311	ATP synthase subunit alpha, mitochondrial
T4009161	TraesCS1B02G440900	chr1B	696906137	696906655	Mitochondrial transcription termination factor-like
T4009181	TraesCSU02G218700	chr1B	698670340	698671584	F-box family protein
T4009182	TraesCSU02G218700	chr1B	698674789	698676033	F-box family protein
T4009211	TraesCS1B02G445500	chr1B	700889289	700890662	ATP-dependent RNA helicase
T4009232	TraesCS1B02G447800	chr1B	702384124	702385595	DUF1645 family protein
T4009424	TraesCSU02G257800	chr1B	713369528	713370611	Dirigent protein
T4009425	TraesCSU02G257800	chr1B	713383484	713384567	Dirigent protein
T4009426	TraesCSU02G257600	chr1B	713444226	713445229	Dirigent protein
T4009427	TraesCSU02G257600	chr1B	713494493	713495496	Dirigent protein
T4009430	TraesCS1B02G468300	chr1B	713772263	713773410	Dirigent protein
T4009431	TraesCS1B02G468400	chr1B	713823124	713824291	Dirigent protein
T4009432	TraesCSU02G257800	chr1B	713877112	713878195	Dirigent protein
T4009433	TraesCSU02G257600	chr1B	713902618	713903621	Dirigent protein
T4009435	TraesCSU02G257800	chr1B	714020980	714022063	Dirigent protein
T4009436	TraesCSU02G257600	chr1B	714028380	714029383	Dirigent protein
T4009437	TraesCSU02G257800	chr1B	714050322	714051405	Dirigent protein
T4009438	TraesCS1B02G468400	chr1B	714086265	714087432	Dirigent protein
T4009439	TraesCS1B02G468400	chr1B	714114394	714115561	Dirigent protein
T4009455	TraesCS1B02G469600	chr1B	714691253	714692292	Cysteine/Histidine-rich C1 domain family protein
T4009464	TraesCSU02G203200	chr1B	715261228	715261861	ATPase E1-E2 type family protein / haloacid dehalogenase-like hydrolase family protein
T4009468	TraesCS1B02G471000	chr1B	715513709	715514499	Calmodulin, putative
T4009481	TraesCS2A02G098800	chr1B	716950858	716951882	VQ motif-containing family protein
T4009501	TraesCS1B02G474100	chr1B	718682154	718684005	Elongation factor 1-alpha
T4009526	TraesCS1B02G476900	chr1B	722332006	722333351	F-box family protein
T4009568	TraesCS4A02G458900	chr1B	726094636	726096921	Protein kinase family protein
T4009573	TraesCSU02G271000	chr1B	727090109	727090306	O-methyltransferase
T4009574	TraesCSU02G271000	chr1B	727148316	727148513	O-methyltransferase
T4009575	TraesCSU02G271000	chr1B	727180097	727180294	O-methyltransferase
T4009576	TraesCSU02G271000	chr1B	727205715	727205912	O-methyltransferase
T4009577	TraesCSU02G271000	chr1B	727258074	727258271	O-methyltransferase
T4009578	TraesCSU02G205900	chr1B	727299113	727300818	O-methyltransferase-like protein
T4009579	TraesCSU02G271000	chr1B	727364002	727364199	O-methyltransferase
T4009580	TraesCSU02G271000	chr1B	727407730	727407927	O-methyltransferase
T4009581	TraesCSU02G271000	chr1B	727497945	727498142	O-methyltransferase
T4009582	TraesCSU02G271000	chr1B	727547224	727547421	O-methyltransferase
T4009584	TraesCSU02G271000	chr1B	727662760	727662957	O-methyltransferase
T4009585	TraesCSU02G205900	chr1B	727703390	727705095	O-methyltransferase-like protein
T4009586	TraesCSU02G271000	chr1B	727823095	727823292	O-methyltransferase
T4009588	TraesCSU02G271000	chr1B	727906998	727907195	O-methyltransferase
T4009590	TraesCSU02G271000	chr1B	728206582	728206779	O-methyltransferase
T4009591	TraesCSU02G205900	chr1B	728329173	728330878	O-methyltransferase-like protein
T4009592	TraesCSU02G271000	chr1B	728390333	728390530	O-methyltransferase
T4009597	TraesCSU02G005100	chr1B	728827888	728829704	UDP-glycosyltransferase
T4009599	TraesCS1D02G001900	chr1D	81204	82866	Charged multivesicular body protein 5
T4009600	TraesCS1D02G002000	chr1D	86857	89957	carboxyl-terminal peptidase, putative (DUF239)
T4009643	TraesCS1D02G001800	chr1D	1321372	1322997	Leucine-rich repeat receptor-like protein kinase family protein, putative
T4009646	TraesCSU02G272393	chr1D	1341775	1342248
T4009647	TraesCSU02G272393	chr1D	1355680	1356153
T4009648	TraesCSU02G272393	chr1D	1369600	1370073
T4009663	TraesCS1B02G005600	chr1D	2031308	2034012	SNF1-related protein kinase regulatory subunit beta-2
T4009668	TraesCS1D02G004800	chr1D	3231290	3234567	Chaperone protein dnaJ, putative
T4009680	TraesCS1D02G004800	chr1D	3455916	3459193	Chaperone protein dnaJ, putative
T4009689	TraesCS1D02G005600	chr1D	3874148	3875266	transmembrane protein, putative (DUF594)
T4009697	TraesCS1D02G006464	chr1D	4460443	4462313
T4009698	TraesCS1D02G006500	chr1D	4491075	4496205	Pm3-like disease resistance protein
T4009713	TraesCSU02G005700	chr1D	5482110	5483123	Dirigent protein
T4009715	TraesCS1D02G008700	chr1D	5492544	5494305	Dirigent protein
T4009719	TraesCS1D02G009100	chr1D	5744117	5751127	Glucan 1,3-beta-glucosidase
T4009741	TraesCS1D02G009700	chr1D	6745716	6747187	O-methyltransferase-like protein
T4009830	TraesCS1D02G019500	chr1D	9535283	9536262	Thionin
T4009895	TraesCS1D02G025800	chr1D	11856039	11856605	Ankyrin repeat protein family-like
T4009932	TraesCS1D02G027700	chr1D	12822786	12823001	Chymotrypsin inhibitor
T4009933	TraesCS1D02G027800	chr1D	12828989	12829243	Chymotrypsin inhibitor
T4009934	TraesCS1D02G027700	chr1D	12846080	12846295	Chymotrypsin inhibitor
T4009935	TraesCS1D02G027800	chr1D	12852283	12852537	Chymotrypsin inhibitor
T4010013	TraesCS1D02G036000	chr1D	19659561	19661152	Lecithin-cholesterol acyltransferase-like 1
T4010026	TraesCSU02G244000	chr1D	20404484	20405837	Homeobox leucine zipper protein
T4010027	TraesCSU02G244000	chr1D	20424401	20425755	Homeobox leucine zipper protein
T4010065	TraesCS7D02G519300	chr1D	23665770	23667445	3-ketoacyl-CoA synthase
T4010071	TraesCS1D02G040600	chr1D	24251923	24252298	Defensin
T4010089	TraesCS1D02G042400	chr1D	25600724	25605522	Ankyrin repeat protein-like
T4010100	TraesCS1D02G043200	chr1D	27227747	27229475	TOX high mobility group box family member 4-A, putative isoform 1
T4010101	TraesCS1D02G043300	chr1D	27284208	27285532	MYB transcription factor
T4010120	TraesCS1D02G044900	chr1D	29289928	29290680	DUF674 family protein
T4010121	TraesCS1D02G044900	chr1D	29306080	29306832	DUF674 family protein
T4010173	TraesCS1D02G050700	chr1D	35995861	35996723	Dirigent protein
T4010176	TraesCS1D02G050800	chr1D	36128106	36129280	Dirigent protein
T4010177	TraesCS1D02G050800	chr1D	36156161	36157335	Dirigent protein
T4010180	TraesCS1D02G050800	chr1D	36380507	36381681	Dirigent protein
T4010186	TraesCS5A02G094700	chr1D	37258683	37258994	Glutaredoxin family protein
T4010187	TraesCS5A02G094800	chr1D	37274807	37275118	Glutaredoxin family protein
T4010199	TraesCS1D02G052500	chr1D	39601701	39603598	Tryptophan decarboxylase
T4010263	TraesCS1D02G058800	chr1D	46016587	46019686	Receptor-like protein kinase
T4010276	TraesCS1D02G060400	chr1D	47523030	47523839	Histidinol-phosphate aminotransferase
T4010302	TraesCS1D02G062900	chr1D	50276776	50277434	Low temperature and salt responsive protein family
T4010305	TraesCS1D02G063059	chr1D	50633150	50634389
T4010306	TraesCS1D02G063059	chr1D	50670132	50671371
T4010307	TraesCS2D02G008400	chr1D	50737728	50738902	LOB domain-containing protein, putative
T4010376	TraesCS1D02G069200	chr1D	58916187	58916461	response regulator 16
T4010401	TraesCS1D02G072400	chr1D	61859693	61859890	UDP-D-glucose/UDP-D-galactose 4-epimerase 5
T4010403	TraesCS1D02G072600	chr1D	62048588	62050289	Trihelix transcription factor GT-3b
T4010434	TraesCS1D02G075400	chr1D	66873442	66874778	BTB/POZ domain containing protein, expressed
T4010461	TraesCS1D02G077700	chr1D	69391377	69395837	Agenet domain-containing protein
T4010482	TraesCS1D02G080000	chr1D	72675772	72677264	Peroxidase
T4010489	TraesCS1D02G080600	chr1D	73008901	73010359	Peroxidase
T4010573	TraesCS1D02G089000	chr1D	85467057	85469337	Queuine tRNA-ribosyltransferase
T4010599	TraesCS4D02G262200	chr1D	89895591	89896083	ArfGap/RecO-like zinc finger domain-containing protein
T4010606	TraesCS1D02G092300	chr1D	90280189	90282563	Pentatricopeptide repeat-containing protein
T4010631	TraesCS1D02G094800	chr1D	92121608	92122559	Glutathione S-transferase
T4010670	TraesCSU02G223000	chr1D	97374800	97375222	Bifunctional inhibitor/lipid-transfer protein/seed storage 2Salbumin superfamily protein
T4010761	TraesCS1D02G108400	chr1D	113987132	113989043	CsAtPR5, putative, expressed
T4010780	TraesCS1D02G110500	chr1D	117877941	117878192	Plant invertase/pectin methylesterase inhibitor superfamily protein
T4010781	TraesCS1D02G110500	chr1D	117888817	117889068	Plant invertase/pectin methylesterase inhibitor superfamily protein
T4010783	TraesCS1D02G037600	chr1D	117988288	117991283	RWP-RK domain containing protein
T4010840	TraesCS1D02G115500	chr1D	125524596	125526829	carboxyl-terminal peptidase, putative (DUF239)
T4010841	TraesCS1D02G115500	chr1D	125542762	125544995	carboxyl-terminal peptidase, putative (DUF239)
T4010882	TraesCS7D02G353700	chr1D	129016893	129019214	cDNA clone:J013058P10, full insert sequence
T4010883	TraesCS1D02G118900	chr1D	129036239	129037288	Protein kinase-like
T4010916	TraesCS1D02G121700	chr1D	136562772	136565829	Hypoxanthine phosphoribosyltransferase
T4010946	TraesCS1D02G125100	chr1D	147644987	147652553	basic helix-loop-helix (bHLH) DNA-binding superfamily protein
T4010949	TraesCS1D02G125300	chr1D	149282357	149288362	DNA helicase
T4010958	TraesCS1D02G126100	chr1D	153547201	153547470	Phosphoribosylaminoimidazole-succinocarboxamide synthase
T4010959	TraesCS1D02G126200	chr1D	153549436	153552723	F-box protein-like
T4010978	TraesCS6D02G107500	chr1D	156555131	156556132	ABC transporter family protein
T4010999	TraesCS1D02G129900	chr1D	159901554	159907593	Ulp1 protease family, C-terminal catalytic domain containing protein, expressed
T4011000	TraesCS1D02G130000	chr1D	159909195	159909968	Sentrin-specific protease
T4011001	TraesCS1D02G129800	chr1D	159937157	159940462	Transcriptional factor B3 family protein
T4011011	TraesCSU02G270200	chr1D	161003446	161003860	50S ribosomal protein L22
T4011019	TraesCS1D02G130700	chr1D	161449268	161449985	Epidermis-specific secreted glycoprotein EP1
T4011047	TraesCSU02G109600	chr1D	177855349	177856290	Mediator of RNA polymerase II transcription subunit 23
T4011129	TraesCS1D02G139200	chr1D	211233027	211234274	Expansin
T4011160	TraesCS1D02G142300	chr1D	218247036	218256997	Polyadenylate-binding protein
T4011169	TraesCS5B02G172200	chr1D	219048114	219048943	Dirigent protein
T4011171	TraesCS5D02G287600	chr1D	219377549	219378124	Translation initiation factor IF-2
T4011276	TraesCS1D02G153000	chr1D	234777022	234777598	Cytochrome c oxidase subunit 1
T4011286	TraesCS1D02G154300	chr1D	238009777	238010141	transmembrane protein
T4011319	TraesCS1D02G157700	chr1D	244397856	244400659	Zinc finger CCCH domain-containing protein 4
T4011363	TraesCSU02G133700	chr1D	253938901	253941880	F-box domain containing protein
T4011364	TraesCSU02G133800	chr1D	253945200	253946264	F-box family protein
T4011387	TraesCS1D02G165500	chr1D	259176202	259178595	Membrane steroid-binding protein
T4011450	TraesCS1D02G170800	chr1D	267501868	267501963	Cytochrome b6-f complex subunit 6
T4011451	TraesCS1D02G170900	chr1D	267502143	267502256	Cytochrome b6-f complex subunit 5
T4011458	TraesCS2B02G487300	chr1D	268029394	268029705	30S ribosomal protein S14
T4011502	TraesCS1D02G175200	chr1D	273645402	273647106	Aquaporin
T4011523	TraesCS6D02G245100	chr1D	276562231	276564435	F-box family protein
T4011525	TraesCS1D02G177200	chr1D	276656232	276657071	DUF241 domain protein (DUF241)
T4011526	TraesCS1D02G177300	chr1D	276663462	276664265	DUF241 domain protein (DUF241)
T4011541	TraesCS6D02G080000	chr1D	278713545	278713785	30S ribosomal protein S19, chloroplastic
T4011544	TraesCS3D02G370300	chr1D	278732389	278733610	carboxyl-terminal peptidase, putative (DUF239)
T4011550	TraesCS1D02G180300	chr1D	278793635	278793880	Photosystem I iron-sulfur center
T4011587	TraesCS1D02G186700	chr1D	282692411	282698560	Membrane protein insertase YidC
T4011595	TraesCS1D02G187500	chr1D	283756473	283758406	Rhomboid-like protein
T4011602	TraesCS1D02G188200	chr1D	285465264	285467019	Protein DETOXIFICATION
T4011613	TraesCS1D02G189000	chr1D	286970172	286980544	Ubiquitin carboxyl-terminal hydrolase-like protein
T4011614	TraesCS1D02G189100	chr1D	286973206	286974652	SPA1-related 3
T4011633	TraesCS1D02G190600	chr1D	287657810	287659176	Glutathione S-transferase
T4011634	TraesCS1D02G190600	chr1D	287732055	287733421	Glutathione S-transferase
T4011679	TraesCS1D02G195000	chr1D	299230416	299233721	Carbohydrate kinase-like protein
T4011727	TraesCS1D02G199900	chr1D	309260704	309262324	GDSL esterase/lipase
T4011736	TraesCS1D02G200900	chr1D	309973448	309974980	WRKY family transcription factor
T4011765	TraesCS1D02G203800	chr1D	315540704	315541171	Dynein light chain
T4011766	TraesCS1D02G204100	chr1D	315575210	315576069	Heavy metal transport/detoxification protein
T4011769	TraesCS1D02G204300	chr1D	315953482	315960121	p-loop containing nucleoside triphosphate hydrolases superfamily protein
T4011775	TraesCS5D02G527000	chr1D	316831974	316833188	Leucine-rich repeat receptor-like protein kinase
T4011867	TraesCS1D02G214400	chr1D	326476180	326480785	Flavin-containing monooxygenase
T4011868	TraesCS1D02G214400	chr1D	326519037	326523642	Flavin-containing monooxygenase
T4011875	TraesCS1D02G215200	chr1D	327637021	327638745	Expansin protein
T4011910	TraesCS1D02G218600	chr1D	333472802	333475520	Mediator of RNA polymerase II transcription subunit 31
T4011938	TraesCS2D02G485100	chr1D	336967878	336968739	Flowering locus T-like protein
T4011981	TraesCS1D02G225500	chr1D	342854003	342857402	Chaperone protein dnaJ, putative
T4012033	TraesCS1D02G230500	chr1D	348015359	348015475	Photosystem II reaction center protein T
T4012035	TraesCS1D02G230700	chr1D	348087360	348088313	Pectinesterase inhibitor
T4012066	TraesCS1D02G234300	chr1D	352288212	352289032	Defensin-like protein
T4012078	TraesCSU02G116500	chr1D	355246934	355248375	pantothenate kinase 1
T4012160	TraesCS1A02G264500	chr1D	364987735	364989514	Amino acid permease
T4012192	TraesCS1D02G247400	chr1D	371034674	371035239	DNA-directed RNA polymerase subunit beta'
T4012197	TraesCS1D02G247900	chr1D	371789423	371791314	FBD-associated F-box protein
T4012210	TraesCS1D02G249800	chr1D	372843126	372844573	Sulfotransferase
T4012211	TraesCS1D02G249900	chr1D	372848769	372850735	Cytochrome b-c1 complex subunit 9
T4012220	TraesCS1D02G249800	chr1D	373050981	373052428	Sulfotransferase
T4012221	TraesCS1D02G249900	chr1D	373056624	373058590	Cytochrome b-c1 complex subunit 9
T4012239	TraesCS5D02G264400	chr1D	375068104	375068391	B3 domain-containing protein family
T4012240	TraesCS5D02G264300	chr1D	375073466	375074010	ATP-dependent Clp protease adapter protein ClpS
T4012249	TraesCS1D02G251800	chr1D	375310026	375311547	Mitochondrial transcription termination factor family protein
T4012261	TraesCSU02G256900	chr1D	376110912	376111338	Methyl-CpG-binding domain-containing family protein
T4012292	TraesCS1D02G254700	chr1D	379445552	379457304	Squamosa promoter-binding-like protein
T4012305	TraesCS6D02G019300	chr1D	380749006	380749631	Endosperm transfer cell specific PR9
T4012329	TraesCS1D02G258100	chr1D	383466783	383467058	NADH-ubiquinone oxidoreductase chain 1
T4012337	TraesCS1D02G258600	chr1D	383677870	383678157	NADH-ubiquinone oxidoreductase chain 6
T4012358	TraesCS1D02G260400	chr1D	387592161	387601184	SAC3/GANP/Nin1/mts3/eIF-3 p25 family protein
T4012374	TraesCS7D02G362700	chr1D	389119495	389119857	jacalin-related lectin 22
T4012391	TraesCS1D02G264000	chr1D	392715707	392718030	Pectinesterase
T4012400	TraesCS5D02G080900	chr1D	393953744	393954256	Lysine--tRNA ligase
T4012448	TraesCS1D02G269600	chr1D	398531366	398534095	Protein NRT1/ PTR FAMILY 5
T4012452	TraesCS1D02G270000	chr1D	398658594	398661089	Benzyl alcohol O-benzoyltransferase
T4012471	TraesCS1A02G272800	chr1D	399651210	399651434	Imidazole glycerol phosphate synthase subunit HisF
T4012574	TraesCS1D02G284100	chr1D	416404605	416405865	GATA transcription factor
T4012593	TraesCS1D02G285700	chr1D	417837418	417838732	F-box family protein
T4012608	TraesCSU02G103200	chr1D	419314123	419316503	Leucine-rich repeat (LRR) family protein
T4012609	TraesCS1D02G287100	chr1D	419813691	419815720	Protein IQ-DOMAIN 1
T4012710	TraesCS1D02G297300	chr1D	430253277	430256318	Zinc finger CCCH domain-containing protein 4
T4012734	TraesCS6D02G354900	chr1D	432865097	432865578	tryptophan aminotransferase related 2
T4012743	TraesCSU02G262300	chr1D	433425131	433425733	Late embryogenesis abundant hydroxyproline-rich glycoprotein, putative
T4012745	TraesCSU02G262300	chr1D	433450778	433451380	Late embryogenesis abundant hydroxyproline-rich glycoprotein, putative
T4012766	TraesCS1D02G301500	chr1D	435065597	435066649	Sulfotransferase
T4012783	TraesCS1D02G303400	chr1D	436939678	436941627	BTB/POZ domain containing protein, expressed
T4012796	TraesCS1D02G304400	chr1D	438209925	438210902	Peroxidase
T4012830	TraesCS1D02G308000	chr1D	440586722	440587174	Calmodulin
T4012849	TraesCS6D02G272700	chr1D	441962178	441965861	Sulfate transporter
T4012871	TraesCS1D02G312600	chr1D	445429314	445432641	Glycerol-3-phosphate dehydrogenase [NAD(+)]
T4012873	TraesCS6B02G000400	chr1D	445494295	445494798	Cytochrome bo(3) ubiquinol oxidase subunit 1
T4012880	TraesCS1D02G312700	chr1D	445727042	445729988	Cellulose synthase-like protein
T4012881	TraesCS1D02G312800	chr1D	445741637	445745664	'putative beta-1,3-glucanase
T4012882	TraesCS1D02G312900	chr1D	445749334	445750751	Extracellular matrix-binding protein ebh
T4012889	TraesCS1D02G313400	chr1D	446012725	446013270	Blue copper protein
T4012932	TraesCS1D02G317300	chr1D	450015015	450015695	High molecular weight glutenin subunit
T4012937	TraesCS1D02G317600	chr1D	450361117	450362300	Protein kinase family protein
T4012938	TraesCS1D02G317600	chr1D	450379179	450380362	Protein kinase family protein
T4012939	TraesCS1D02G317700	chr1D	450442479	450444024	Peroxidase
T4012955	TraesCS1D02G319000	chr1D	451120322	451122005	Glycosyltransferase
T4012956	TraesCS1D02G319100	chr1D	451128135	451129749	Glycosyltransferase
T4012957	TraesCS5D02G407000	chr1D	451187762	451188400	GDSL esterase/lipase
T4012963	TraesCS1D02G320300	chr1D	452102539	452106020	NAD(P)H dehydrogenase (Quinone)
T4012969	TraesCS3D02G244500	chr1D	452373674	452375586	Ras-related protein, expressed
T4012972	TraesCS1D02G321300	chr1D	452656048	452658738	GDSL esterase/lipase
T4012993	TraesCS1D02G321700	chr1D	453874944	453876391	SPOROCYTELESS-like EAR-containing protein 1
T4013007	TraesCS1D02G324800	chr1D	455278363	455279180	DNA-directed RNA polymerase subunit
T4013027	TraesCS1D02G326800	chr1D	457942182	457942433	alpha/beta-Hydrolases superfamily protein
T4013071	TraesCS1D02G331100	chr1D	460011467	460012705	Ethylene-responsive transcription factor
T4013117	TraesCS1D02G336200	chr1D	465468722	465470921	Rac-like GTP binding protein
T4013118	TraesCS1D02G336300	chr1D	465479853	465484253	Proline iminopeptidase
T4013149	TraesCS1D02G339500	chr1D	468758849	468759268	14 kDa proline-rich protein DC2
T4013187	TraesCS1D02G343700	chr1D	472373460	472375815	E3 ubiquitin ligase-like protein
T4013204	TraesCSU02G197400	chr1D	473262937	473263221	Chymotrypsin inhibitor
T4013208	TraesCS1D02G346300	chr1D	473694178	473694510	Rhamnulose-1-phosphate aldolase
T4013209	TraesCS1D02G346300	chr1D	473737007	473737339	Rhamnulose-1-phosphate aldolase
T4013218	TraesCS1D02G346900	chr1D	474137245	474139074	F-box/RNI-like/FBD-like domains-containing protein
T4013219	TraesCS1D02G347000	chr1D	474143810	474148626	Receptor-like protein kinase
T4013262	TraesCS1D02G351100	chr1D	476683155	476683454	Band 3 anion transport protein
T4013263	TraesCS1D02G351100	chr1D	476698819	476699118	Band 3 anion transport protein
T4013280	TraesCS1D02G352700	chr1D	478558554	478560610	ALA-interacting subunit 3
T4013332	TraesCS1D02G358700	chr1D	483302762	483303079	RING/U-box superfamily protein
T4013334	TraesCS1D02G359000	chr1D	483363467	483364480	F-box protein
T4013403	TraesCS1B02G343300	chr1D	487614518	487615307	Photosystem II reaction center W protein, chloroplastic
T4013404	TraesCS1B02G343200	chr1D	487617302	487617622	Transducin/WD40 repeat-like superfamily protein
T4013407	TraesCS1D02G366200	chr1D	487642599	487649192	SWR1-complex protein 4/DNA methyltransferase 1-associated protein 1
T4013412	TraesCS1D02G366700	chr1D	487948182	487952254	Cytochrome P450 protein
T4013426	TraesCS1D02G367900	chr1D	489013079	489014306	E3 ubiquitin-protein ligase
T4013482	TraesCS4D02G084900	chr1D	493111662	493113103	F-box/kelch-repeat protein
T4013517	TraesCS1D02G377300	chr1D	495633001	495633150	Rotundifolia-like protein
T4013536	TraesCS1D02G379100	chr1D	497378319	497383081	Tyrosyl-DNA phosphodiesterase 2
T4013537	TraesCS1D02G379200	chr1D	497387160	497389279	MYB transcription factor-like
T4013538	TraesCS1D02G379300	chr1D	497395310	497398030	Late embryogenesis abundant protein family protein
T4013554	TraesCS2D02G454700	chr1D	499535594	499535884	senescence-associated family protein (DUF581)
T4013575	TraesCS1D02G384400	chr1D	500606781	500607392	Eukaryotic translation initiation factor 3 subunit B
T4013585	TraesCS1D02G385100	chr1D	501079814	501081129	RING/FYVE/PHD zinc finger superfamily protein
T4013601	TraesCS1D02G386600	chr1D	502049298	502053940	F-box protein
T4013610	TraesCS1D02G387000	chr1D	502540876	502548526	Oligopeptide transporter
T4013633	TraesCS1D02G389400	chr1D	503425322	503426233	Gibberellin-regulated family protein
T4013650	TraesCS1D02G391700	chr1D	504411573	504413123	transmembrane protein, putative (DUF247)
T4013651	TraesCS2D02G407400	chr1D	504473665	504474930	Werner Syndrome-like exonuclease
T4013652	TraesCS1D02G391500	chr1D	504528780	504529115	Sulfate/thiosulfate import ATP-binding protein CysA
T4013654	TraesCS1D02G391700	chr1D	504597420	504598970	transmembrane protein, putative (DUF247)
T4013678	TraesCS1D02G393200	chr1D	505822467	505826069	Tesmin/TSO1-like CXC domain-containing protein
T4013679	TraesCS1D02G393200	chr1D	505848887	505852489	Tesmin/TSO1-like CXC domain-containing protein
T4013692	TraesCS1D02G394900	chr1D	506575768	506576142	Di-glucose binding protein with Kinesin motor domain-containing protein
T4013693	TraesCS1D02G395000	chr1D	506583168	506583759	Type IIA calcium ATPase
T4013700	TraesCS1D02G395300	chr1D	506983535	506984748	Sulfotransferase
T4013701	TraesCS1D02G395400	chr1D	506987658	506987969	DNA-directed RNA polymerase subunit beta
T4013710	TraesCS3D02G428800	chr1D	507534533	507535084	Pre-mRNA-processing-splicing factor 8
T4013723	TraesCS1D02G397300	chr1D	508272934	508276393	Translationally-controlled tumor protein-like protein
T4013749	TraesCS1D02G400200	chr1D	510003462	510006558	Rop guanine nucleotide exchange factor
T4013786	TraesCS1D02G404700	chr1D	513429331	513430200	Fasciclin-like arabinogalactan protein
T4013820	TraesCS6D02G322800	chr1D	514938659	514941193	70 kDa heat shock protein
T4013832	TraesCS1D02G410300	chr1D	515935484	515938253	Carboxyl methyltransferase
T4013873	TraesCS1D02G413900	chr1D	518294964	518296121	Sugar transporter protein
T4013876	TraesCSU02G218100	chr1D	518454879	518456156	F-box domain containing protein
T4013880	TraesCS1D02G414300	chr1D	518526687	518529448	transmembrane protein, putative (DUF594)
T4013891	TraesCS1D02G415300	chr1D	519096722	519097646	DUF1645 family protein
T4013892	TraesCS1D02G415400	chr1D	519165189	519167239	F-box protein
T4013899	TraesCS1D02G415700	chr1D	519310969	519312713	F-box protein
T4013900	TraesCS1D02G415800	chr1D	519314596	519316409	F-box protein
T4013911	TraesCS1D02G417100	chr1D	519939066	519942696	G-box binding factor
T4013952	TraesCS1D02G421600	chr1D	521917549	521918430	Avr9/Cf-9 rapidly elicited protein
T4014018	TraesCS1D02G428000	chr1D	525192773	525197154	Phosphatidate cytidylyltransferase, mitochondrial
T4014037	TraesCS1D02G430600	chr1D	526285922	526292280	Sorting nexin-16
T4014052	TraesCS1D02G431800	chr1D	526709209	526711165	Carboxypeptidase
T4014099	TraesCS1D02G436400	chr1D	529408473	529408673	U5 small nuclear ribonucleoprotein 200 kDa helicase
T4014138	TraesCS1D02G440300	chr1D	531363037	531366033	Leucine-rich repeat receptor-like protein kinase family protein
T4014139	TraesCS1D02G440400	chr1D	531391310	531391804	Type II proteinase inhibitor family protein
T4014140	TraesCS1D02G440500	chr1D	531398122	531399306	Pathogen-related protein
T4014156	TraesCS1D02G442100	chr1D	532231744	532233482	Metacaspase-1
T4014185	TraesCS1D02G444700	chr1D	533468659	533469479	HTH-type transcriptional regulator
T4014199	TraesCS1D02G445900	chr1D	534926414	534927810	Glucose-1-phosphate adenylyltransferase
T4014214	TraesCS1D02G447500	chr1D	536804303	536805719	Conserved oligomeric Golgi complex subunit 1
T4014247	TraesCS1D02G450500	chr1D	539839544	539840797	STE20-like serine/threonine-protein kinase
T4014248	TraesCS1D02G450500	chr1D	539886870	539888123	STE20-like serine/threonine-protein kinase
T4014313	TraesCS2A02G001500	chr2A	699122	703654	Disease resistance protein (NBS-LRR class) family
T4014321	TraesCS2A02G002400	chr2A	1834360	1835388	Zinc finger family protein
T4014349	TraesCS2A02G005100	chr2A	3337303	3339183	Cytochrome P450
T4014350	TraesCS2A02G005200	chr2A	3338969	3342568	Phosphotransferase
T4014351	TraesCS2A02G005100	chr2A	3532325	3534205	Cytochrome P450
T4014352	TraesCS2A02G005200	chr2A	3533991	3537590	Phosphotransferase
T4014397	TraesCS2A02G008600	chr2A	4730098	4731067	Disease resistance protein RGA2
T4014398	TraesCS2A02G008700	chr2A	4732585	4733901	NBS-LRR-like resistance protein
T4014413	TraesCS2A02G011100	chr2A	5094264	5099163	TOM1-like protein 2
T4014433	TraesCSU02G149000	chr2A	6274491	6275119	Actin-related protein 3
T4014461	TraesCSU02G222100	chr2A	7535211	7535884	Sulfotransferase
T4014501	TraesCS2A02G018800	chr2A	10987176	10989044	Cytochrome P450
T4014530	TraesCS2A02G020500	chr2A	13010074	13013830	transmembrane protein, putative (DUF594)
T4014604	TraesCSU02G244600	chr2A	16577485	16578822	Copalyl diphosphate synthase
T4014720	TraesCS2A02G036900	chr2A	20107836	20109454	2-oxoglutarate (2OG) and Fe(II)-dependent oxygenase superfamily protein, putative
T4014769	TraesCS2A02G043900	chr2A	21548971	21549201	Disease resistance protein (NBS-LRR class) family
T4014770	TraesCS2A02G044000	chr2A	21549911	21552339	NBS-LRR resistance-like protein
T4014806	TraesCS2A02G047200	chr2A	22445078	22446329	Xyloglucan endotransglucosylase/hydrolase
T4014833	TraesCS2A02G049900	chr2A	23390333	23391613	Nicotianamine synthase
T4014834	TraesCS2A02G050000	chr2A	23397544	23398784	F-box family protein
T4014835	TraesCS2A02G049900	chr2A	23426576	23427856	Nicotianamine synthase
T4014836	TraesCS2A02G050000	chr2A	23433787	23435027	F-box family protein
T4014849	TraesCS2A02G040400	chr2A	24396578	24397627	F-box family protein
T4014850	TraesCS2A02G040400	chr2A	24419577	24420626	F-box family protein
T4014867	TraesCS2A02G052600	chr2A	25694959	25696821	FAD-binding Berberine family protein
T4014883	TraesCS2A02G054400	chr2A	27131575	27132554	Glutamate receptor ionotropic, NMDA 2D
T4014888	TraesCS2A02G054700	chr2A	27308876	27309199	Cysteine protease, putative
T4014891	TraesCS2A02G054700	chr2A	27393896	27394219	Cysteine protease, putative
T4014892	TraesCS2A02G054800	chr2A	27394435	27394881	Cysteine protease, putative
T4014894	TraesCS2A02G054800	chr2A	27630306	27630752	Cysteine protease, putative
T4014895	TraesCSU02G230900	chr2A	27643340	27643627	Cysteine protease, putative
T4014896	TraesCSU02G230900	chr2A	27792721	27793008	Cysteine protease, putative
T4014897	TraesCSU02G230900	chr2A	27818807	27819094	Cysteine protease, putative
T4014898	TraesCSU02G230900	chr2A	27878049	27878336	Cysteine protease, putative
T4014901	TraesCSU02G230900	chr2A	28200807	28201094	Cysteine protease, putative
T4014902	TraesCSU02G230900	chr2A	28279509	28279796	Cysteine protease, putative
T4014903	TraesCSU02G230900	chr2A	28292968	28293255	Cysteine protease, putative
T4014904	TraesCSU02G230900	chr2A	28316795	28317082	Cysteine protease, putative
T4014905	TraesCSU02G230900	chr2A	28340325	28340612	Cysteine protease, putative
T4014906	TraesCSU02G230900	chr2A	28378988	28379275	Cysteine protease, putative
T4014907	TraesCSU02G230900	chr2A	28410822	28411109	Cysteine protease, putative
T4014908	TraesCSU02G230900	chr2A	28448120	28448407	Cysteine protease, putative
T4014909	TraesCS2A02G054800	chr2A	28706694	28707140	Cysteine protease, putative
T4014910	TraesCS2A02G054700	chr2A	28707356	28707679	Cysteine protease, putative
T4014912	TraesCSU02G230900	chr2A	29084478	29084765	Cysteine protease, putative
T4014932	TraesCS2A02G056500	chr2A	30349186	30350432	Sulfotransferase
T4014933	TraesCS2A02G056500	chr2A	30364115	30365361	Sulfotransferase
T4014936	TraesCSU02G268100	chr2A	30412838	30413133	Protein transport protein Sec61 subunit gamma
T4014982	TraesCS2A02G062900	chr2A	34147672	34148399	Proline-rich protein, putative, expressed
T4015068	TraesCS2A02G068700	chr2A	37520749	37521550	Protein kinase family protein
T4015088	TraesCS2A02G070800	chr2A	38642684	38644420	Glycosyltransferase
T4015097	TraesCS2A02G071500	chr2A	39411159	39413953	Flavin-containing monooxygenase
T4015117	TraesCS2A02G075200	chr2A	41150285	41156680	1-deoxy-D-xylulose-5-phosphate synthase, Transketolase
T4015128	TraesCS2A02G076600	chr2A	42126659	42128120	L-lactate dehydrogenase
T4015146	TraesCS2A02G078200	chr2A	43605036	43605798	Cytochrome P450, putative
T4015147	TraesCS2A02G078300	chr2A	43609162	43610761	Cytochrome P450
T4015175	TraesCSU02G009600	chr2A	44773296	44774668	Expansin protein
T4015176	TraesCSU02G009600	chr2A	44790246	44791618	Expansin protein
T4015181	TraesCS2A02G081500	chr2A	45002724	45003591	RING/U-box superfamily protein
T4015192	TraesCS2A02G082300	chr2A	45394859	45395518	Tapetum determinant 1
T4015193	TraesCS2A02G082400	chr2A	45410454	45413695	UvrABC system protein C
T4015219	TraesCS2A02G085100	chr2A	47396290	47398642	RING/FYVE/PHD zinc finger protein
T4015220	TraesCS7A02G200900	chr2A	47670568	47672664	related to KPC1
T4015404	TraesCS2A02G104200	chr2A	67312317	67314878	Eukaryotic translation initiation factor 2 subunit beta
T4015436	TraesCS2A02G108300	chr2A	70252760	70253980	Peroxidase
T4015437	TraesCS2A02G108300	chr2A	70282144	70283364	Peroxidase
T4015450	TraesCS2A02G109500	chr2A	71382790	71385815	Peroxiredoxin
T4015554	TraesCS2A02G120000	chr2A	81001470	81006959	Ypt/Rab-GAP domain of gyp1p superfamily protein
T4015710	TraesCS2A02G136200	chr2A	93788739	93790113	ARM repeat superfamily protein
T4015749	TraesCS4B02G127500	chr2A	96698479	96703059	weak chloroplast movement under blue light protein (DUF827)
T4015755	TraesCS2A02G140100	chr2A	97618927	97620750	BSD domain-containing protein 1
T4015756	TraesCS2A02G140200	chr2A	97622668	97624565	Glycosyltransferase
T4015762	TraesCS2A02G140800	chr2A	98639190	98641250	Serrate RNA effector molecule homolog
T4015852	TraesCS2A02G149900	chr2A	110652940	110653821	Fibroin heavy chain
T4015862	TraesCS2A02G151000	chr2A	112166166	112166483	Zinc finger protein
T4015871	TraesCS7D02G465900	chr2A	113467548	113476987	Pleiotropic drug resistance ABC transporter
T4015949	TraesCS2A02G159200	chr2A	120964786	120965692	RNA-binding (RRM/RBD/RNP motifs) family protein
T4015957	TraesCS1A02G311800	chr2A	125126755	125131221	Zinc finger protein 830
T4015958	TraesCS1A02G311900	chr2A	125134391	125135933	Transcription factor
T4015959	TraesCS1A02G312000	chr2A	125137781	125139609	Adenine phosphoribosyltransferase-like protein, putative (DUF2358)
T4016004	TraesCS2B02G191000	chr2A	131598419	131598529	Dolichyl-diphosphooligosaccharide--protein glycosyltransferase subunit 4
T4016021	TraesCS2A02G167200	chr2A	133512036	133518527	Cysteine-rich receptor kinase
T4016083	TraesCS2A02G172700	chr2A	144263582	144268135	Acidic leucine-rich nuclear phosphoprotein 32-related protein
T4016094	TraesCS2A02G173700	chr2A	146169428	146169655	lysine ketoglutarate reductase trans-splicing-like protein (DUF707)
T4016110	TraesCS2A02G175000	chr2A	148668888	148671027	COBRA-like protein
T4016116	TraesCS2A02G175500	chr2A	148831764	148835061	Pentatricopeptide repeat-containing protein, putative
T4016124	TraesCS2A02G176600	chr2A	150884021	150884641	Disease resistance protein RGA2
T4016142	TraesCS2A02G177500	chr2A	152188092	152191259	Dihydroflavonol-4-reductase
T4016162	TraesCS2A02G180700	chr2A	154763462	154764049	Protein tesmin/TSO1-like CXC 2
T4016175	TraesCS5A02G361000	chr2A	156356909	156357388	Zinc finger protein
T4016247	TraesCS2A02G086600	chr2A	170463497	170463886	Mitochondrial import inner membrane translocase subunit Tim17
T4016249	TraesCS5B02G384300	chr2A	170721421	170725267	NBS-LRR-like resistance protein
T4016259	TraesCS2A02G190200	chr2A	172041969	172044303	Kinase family protein
T4016260	TraesCS2A02G190300	chr2A	172055119	172056913	Cytochrome b561 and DOMON domain-containing protein
T4016285	TraesCS2A02G192800	chr2A	176667589	176672478	BTB/POZ domain-containing protein
T4016286	TraesCS6A02G103000	chr2A	176804199	176804810	F-box domain containing protein
T4016307	TraesCS2A02G195000	chr2A	180944557	180946229	endomembrane-type CA-ATPase 4
T4016331	TraesCS2A02G198300	chr2A	185931318	185931679	RING/U-box superfamily protein
T4016347	TraesCS2A02G200400	chr2A	188876705	188880691	Adenosine deaminase
T4016373	TraesCS2A02G203100	chr2A	194261338	194265453	Secretory carrier-associated membrane protein
T4016378	TraesCS2B02G230700	chr2A	195206281	195207181	Methionyl-tRNA synthetase
T4016452	TraesCS2A02G211400	chr2A	212986255	212986587	60S ribosomal protein L17
T4016455	TraesCS2A02G211400	chr2A	213283837	213284169	60S ribosomal protein L17
T4016493	TraesCS2A02G215100	chr2A	220131626	220135094	Beta-amylase
T4016494	TraesCS2A02G215300	chr2A	220150676	220153790	Beta-amylase
T4016510	TraesCS2A02G216200	chr2A	221487747	221489942	Glucan endo-1,3-beta-glucosidase 3
T4016515	TraesCS2A02G217200	chr2A	221763539	221766917	Protein kinase
T4016524	TraesCS5A02G531000	chr2A	223071179	223071394	Powder tolerance-related protein
T4016527	TraesCS2B02G550900	chr2A	223483798	223484854	Transcription factor protein
T4016557	TraesCS5A02G197800	chr2A	230410493	230415431	WD-repeat cell cycle regulatory protein
T4016572	TraesCS2A02G222800	chr2A	233072238	233077907	BNR/Asp-box repeat family protein
T4016649	TraesCS2A02G229800	chr2A	281767571	281768618	Ras-related protein Rab-3C
T4016673	TraesCS4A02G022800	chr2A	296096742	296103506	DNA repair protein-like protein
T4016674	TraesCS4A02G022700	chr2A	296103993	296107871	Homeobox protein BEL1 like
T4016688	TraesCS2A02G233800	chr2A	299017290	299023475	Nucleobase ascorbate transporter
T4016697	TraesCS5A02G488500	chr2A	306561145	306562944	GRAM domain-containing protein / ABA-responsive
T4016704	TraesCS2A02G235300	chr2A	313065640	313066332	P-loop containing nucleoside triphosphate hydrolases superfamily protein
T4016713	TraesCS5D02G304700	chr2A	321472083	321476432	Kinase family protein
T4016714	TraesCS5D02G304800	chr2A	321476744	321479768	RNA-binding family protein
T4016715	TraesCS5D02G304900	chr2A	321486030	321487795	B3 domain-containing protein
T4016726	TraesCS5A02G118600	chr2A	331717547	331720261	V-type proton ATPase proteolipid subunit
T4016733	TraesCS4A02G151600	chr2A	339212332	339213156	P-loop containing nucleoside triphosphate hydrolases superfamily protein
T4016743	TraesCS2A02G238700	chr2A	346537676	346539744	Growth-regulating factor
T4016748	TraesCS5B02G365000	chr2A	353375232	353377320	Acetyl-coenzyme A synthetase
T4016753	TraesCS1B02G458200	chr2A	357320289	357321503	Maturase
T4016757	TraesCS1A02G227800	chr2A	357903172	357905222	Conotoxin VnMEKL-0111
T4016773	TraesCS7A02G388100	chr2A	360580041	360580211	NAD(P)H-quinone oxidoreductase subunit 2, chloroplastic
T4016820	TraesCS2A02G231100	chr2A	389254581	389255417	Tryptophan synthase alpha chain
T4016828	TraesCS2A02G247600	chr2A	395358509	395358802	4-hydroxy-2-oxovalerate aldolase
T4016829	TraesCS2A02G247700	chr2A	395358523	395367176	Ubiquitin-conjugating enzyme (E2)
T4016841	TraesCS2A02G248900	chr2A	400636158	400636625	Pyridoxine/pyridoxamine 5'-phosphate oxidase
T4016865	TraesCSU02G101500	chr2A	408310099	408311754	hydroxysteroid dehydrogenase 3
T4016868	TraesCSU02G063000	chr2A	409768343	409769780	Glycosyltransferase
T4016870	TraesCS2A02G251700	chr2A	409975708	409976121	Glutaredoxin
T4016923	TraesCS2A02G256500	chr2A	423161490	423165199	RNA-binding family protein
T4016935	TraesCS7B02G405400	chr2A	425997935	426005650	Ubiquitin carboxyl-terminal hydrolase family protein
T4016955	TraesCS2A02G259500	chr2A	437859012	437862434	Sugar transporter, putative
T4016975	TraesCS2A02G261900	chr2A	443466751	443469638	WRKY transcription factor
T4016981	TraesCS2A02G262400	chr2A	443998923	443999681	Blue copper protein
T4017054	TraesCS7A02G359400	chr2A	468502632	468503189	Hydrophobic family protein
T4017057	TraesCSU02G208900	chr2A	469264485	469266471	Receptor-like protein kinase
T4017096	TraesCS7A02G311400	chr2A	480607936	480609503	BTB/POZ domain containing protein, expressed
T4017107	TraesCS4A02G004200	chr2A	482729519	482729857	regulatory particle non-ATPase 13
T4017139	TraesCS2A02G277600	chr2A	492100860	492101565	RALF
T4017151	TraesCS2A02G279000	chr2A	495632621	495636542	EH domain-containing protein 1
T4017191	TraesCS2A02G282500	chr2A	505946350	505946931	Ethylene-responsive transcription factor
T4017197	TraesCS2A02G283000	chr2A	507259002	507260368	Auxin response factor
T4017198	TraesCS2A02G283100	chr2A	507264203	507264988	BRI1 suppressor 1 (BSU1)-like 3
T4017199	TraesCS2A02G283200	chr2A	507266790	507268308	B3 domain-containing protein
T4017244	TraesCS2A02G287700	chr2A	524515794	524518207	Protein DYAD
T4017247	TraesCS4B02G036000	chr2A	526354065	526354613	DNA topoisomerase
T4017310	TraesCS2A02G294500	chr2A	540783937	540789216	Cell division protein ftsZ
T4017391	TraesCS2A02G301300	chr2A	551697968	551704081	Protein SET DOMAIN GROUP 41
T4017392	TraesCS2A02G301400	chr2A	551705282	551706195	Disease resistance protein (TIR-NBS-LRR class) family
T4017529	TraesCS2A02G315300	chr2A	576818132	576820953	Glutamate decarboxylase
T4017532	TraesCS2A02G315500	chr2A	577090308	577091333	Reductase 1
T4017537	TraesCS2A02G316400	chr2A	578324895	578330613	mediator of RNA polymerase II transcription subunit-like protein
T4017544	TraesCS7D02G256000	chr2A	578797092	578797341	Ras-related small GTP-binding family protein
T4017546	TraesCS3B02G188600	chr2A	578804659	578804850	50S ribosomal protein L32, chloroplastic
T4017547	TraesCSU02G245600	chr2A	578809211	578809516	NADH-quinone oxidoreductase subunit K
T4017549	TraesCS4B02G124900	chr2A	578816870	578817142	30S ribosomal protein S15
T4017551	TraesCSU02G254600	chr2A	578819636	578819836	Protein kinase superfamily protein
T4017552	TraesCS4B02G124900	chr2A	578822492	578822764	30S ribosomal protein S15
T4017554	TraesCS4B02G124900	chr2A	578830876	578831148	30S ribosomal protein S15
T4017555	TraesCS4B02G124900	chr2A	578859254	578859526	30S ribosomal protein S15
T4017610	TraesCS2A02G322200	chr2A	588859362	588862064	E3 UFM1-protein ligase 1 homolog
T4017797	TraesCSU02G143400	chr2A	617110183	617111537	Chalcone synthase
T4017817	TraesCS2A02G344600	chr2A	619757452	619758932	Glyceraldehyde-3-phosphate dehydrogenase
T4017825	TraesCS2A02G345200	chr2A	621109014	621110883	F-box protein family
T4017859	TraesCS7A02G424200	chr2A	626559177	626559857	RNA-binding protein
T4017863	TraesCS2A02G349800	chr2A	627180563	627185737	Transporter
T4017864	TraesCS2A02G349900	chr2A	627184805	627185014	Cysteine/Histidine-rich C1 domain family protein
T4017931	TraesCSU02G268100	chr2A	638324849	638325144	Protein transport protein Sec61 subunit gamma
T4017973	TraesCS5A02G247100	chr2A	643070459	643076382	Protein curvature thylakoid chloroplastic-like
T4017974	TraesCS5A02G247200	chr2A	643078000	643083969	Glucose-6-phosphate isomerase
T4017975	TraesCS5A02G247300	chr2A	643083957	643087039	RING finger protein
T4018052	TraesCS2A02G368800	chr2A	650913178	650914005	FBD-associated F-box protein
T4018068	TraesCS2A02G370400	chr2A	652015147	652017854	MYB transcription factor
T4018069	TraesCS2A02G370500	chr2A	652057965	652059134	Zinc knuckle family protein, expressed
T4018104	TraesCS2A02G374200	chr2A	656107023	656107772	Transcriptional regulatory protein EDS1
T4018105	TraesCS2A02G374300	chr2A	656108957	656113625	UPF0426 protein, chloroplastic
T4018114	TraesCS2A02G375300	chr2A	656519946	656521591	GRAM domain-containing protein / ABA-responsive
T4018120	TraesCS2A02G375200	chr2A	656784732	656786114	GRAM domain-containing protein / ABA-responsive protein-related
T4018144	TraesCS2A02G378800	chr2A	660373254	660373784	Avr9/Cf-9 rapidly elicited protein
T4018168	TraesCS2A02G380900	chr2A	663534815	663537731	Phenylalanine ammonia-lyase
T4018190	TraesCSU02G264000	chr2A	667841992	667842225	Tesmin/TSO1-like CXC domain containing protein
T4018194	TraesCS2A02G383700	chr2A	667960218	667960980	cellulose synthase family protein
T4018217	TraesCS2A02G385200	chr2A	670926268	670931041	Fatty acid hydroxylase superfamily protein
T4018252	TraesCS2A02G389500	chr2A	677061747	677064050	Ubiquitin-specific protease family C19-related protein
T4018268	TraesCS2A02G390900	chr2A	679842410	679846798	V-type ATP synthase alpha chain
T4018280	TraesCS2A02G392100	chr2A	681415801	681420093	WRKY transcription factor
T4018367	TraesCS1A02G252100	chr2A	695105362	695107637	B3 domain-containing protein
T4018396	TraesCS2A02G404300	chr2A	699615644	699616192	DNA topoisomerase
T4018400	TraesCS2A02G405000	chr2A	700217019	700221494	O-fucosyltransferase family protein
T4018457	TraesCS2A02G410300	chr2A	707969227	707971012	Glycosyltransferase
T4018461	TraesCS2A02G410400	chr2A	708127624	708133468	Copper-transporting ATPase
T4018563	TraesCS2A02G419700	chr2A	716519412	716520572	F-box family protein
T4018565	TraesCS2A02G420000	chr2A	716802602	716807693	Calcium-binding EF-hand family protein
T4018583	TraesCS2A02G421800	chr2A	718064486	718065704	Cysteine protease
T4018586	TraesCS2A02G422100	chr2A	718329369	718330557	Cysteine protease
T4018640	TraesCS2A02G426300	chr2A	721646027	721647913	transmembrane protein, putative (DUF247)
T4018679	TraesCS2A02G430800	chr2A	725975821	725976133	Lipid transfer protein
T4018698	TraesCS2A02G432500	chr2A	727603540	727604278	30S ribosomal protein S10
T4018786	TraesCS2A02G442000	chr2A	734911035	734915790	WD-40 repeat family protein-2
T4018871	TraesCS2A02G450000	chr2A	743861898	743862889	Methyl esterase
T4018872	TraesCS2A02G450200	chr2A	743886821	743889837	ATP-dependent caseinolytic protease/crotonase family protein
T4018885	TraesCS2A02G451700	chr2A	745297174	745298808	Poly(A) polymerase
T4018886	TraesCS2A02G451700	chr2A	745331601	745333235	Poly(A) polymerase
T4018934	TraesCS2A02G456800	chr2A	750240579	750242995	F-box family protein
T4018935	TraesCS2A02G456900	chr2A	750246069	750248160	Receptor-like protein kinase
T4018943	TraesCS2A02G457100	chr2A	750571256	750574052	Protein SET DOMAIN GROUP 40
T4019013	TraesCS2A02G464800	chr2A	755315552	755316355	Disease resistance protein (TIR-NBS-LRR class) family
T4019026	TraesCS2A02G466200	chr2A	756185082	756185438	B0809H07
T4019033	TraesCSU02G160700	chr2A	756883349	756885061	Protein PLASTID MOVEMENT IMPAIRED 1
T4019034	TraesCSU02G081300	chr2A	756885730	756891644	Actin-related protein 2/3 complex subunit
T4019040	TraesCS2A02G467200	chr2A	757100371	757101396	Homeodomain-like protein
T4019050	TraesCS2D02G468000	chr2A	757961383	757961962	Zinc finger (Ran-binding) family protein
T4019057	TraesCS2A02G468500	chr2A	758347027	758349246	Polyphenol oxidase
T4019081	TraesCS2A02G470700	chr2A	759258933	759260057	BTB/POZ domain containing protein
T4019082	TraesCS5D02G010100	chr2A	759264454	759264564	Photosystem I reaction center subunit VIII
T4019087	TraesCS2A02G471100	chr2A	759528779	759529711	CAX-interacting protein 4
T4019113	TraesCS2A02G473600	chr2A	761504396	761506462	Apolipoprotein D
T4019145	TraesCS2A02G476700	chr2A	762693734	762694675	Pathogenesis-related protein 1
T4019169	TraesCS2A02G479100	chr2A	764136004	764137815	Cyclin family protein
T4019211	TraesCS7B02G292600	chr2A	766151621	766152124	E3 ubiquitin-protein ligase SINA-like 10
T4019227	TraesCS2A02G482200	chr2A	766633338	766636165	Anthocyanidin reductase
T4019233	TraesCS2A02G485300	chr2A	767014873	767017343	RNA 2'-phosphotransferase
T4019234	TraesCS2A02G485400	chr2A	767018333	767020187	30S ribosomal protein S10
T4019235	TraesCS2A02G485500	chr2A	767020608	767024182	Lipid phosphate phosphatase-like protein
T4019236	TraesCS2A02G485300	chr2A	767060979	767063449	RNA 2'-phosphotransferase
T4019237	TraesCS2A02G485400	chr2A	767064439	767066293	30S ribosomal protein S10
T4019238	TraesCS2A02G485500	chr2A	767066714	767070288	Lipid phosphate phosphatase-like protein
T4019240	TraesCS2A02G485300	chr2A	767246031	767248501	RNA 2'-phosphotransferase
T4019241	TraesCS2A02G485400	chr2A	767249491	767251345	30S ribosomal protein S10
T4019242	TraesCS2A02G485500	chr2A	767251766	767255340	Lipid phosphate phosphatase-like protein
T4019291	TraesCS7D02G210200	chr2A	770864477	770867773	HIPL1 protein
T4019292	TraesCS7D02G210300	chr2A	770870926	770871767	Basic blue-like protein
T4019321	TraesCS2A02G493300	chr2A	772696732	772697520	Cysteine/histidine-rich C1 domain protein
T4019324	TraesCS2A02G493300	chr2A	772910829	772911617	Cysteine/histidine-rich C1 domain protein
T4019334	TraesCSU02G214500	chr2A	773533050	773534274	Auxin responsive SAUR protein
T4019335	TraesCSU02G214500	chr2A	773550398	773551622	Auxin responsive SAUR protein
T4019342	TraesCS2A02G493500	chr2A	773814633	773816906	Flavanone 3-hydroxylase
T4019348	TraesCS4B02G124900	chr2A	774464253	774464525	30S ribosomal protein S15
T4019349	TraesCSU02G254600	chr2A	774467181	774467381	Protein kinase superfamily protein
T4019350	TraesCSU02G263800	chr2A	774467775	774468014	Vps51/Vps67 family (components of vesicular transport) protein
T4019351	TraesCS7D02G256000	chr2A	774468013	774468261	Ras-related small GTP-binding family protein
T4019352	TraesCS4B02G124900	chr2A	774470570	774470842	30S ribosomal protein S15
T4019353	TraesCSU02G254600	chr2A	774473498	774473698	Protein kinase superfamily protein
T4019354	TraesCSU02G263800	chr2A	774474092	774474331	Vps51/Vps67 family (components of vesicular transport) protein
T4019355	TraesCS7D02G256000	chr2A	774474330	774474578	Ras-related small GTP-binding family protein
T4019356	TraesCS4B02G124900	chr2A	774477350	774477622	30S ribosomal protein S15
T4019357	TraesCSU02G254600	chr2A	774480278	774480478	Protein kinase superfamily protein
T4019358	TraesCSU02G263800	chr2A	774480872	774481111	Vps51/Vps67 family (components of vesicular transport) protein
T4019359	TraesCS7D02G256000	chr2A	774481110	774481358	Ras-related small GTP-binding family protein
T4019360	TraesCS4B02G124900	chr2A	774484511	774484783	30S ribosomal protein S15
T4019361	TraesCSU02G254600	chr2A	774487439	774487639	Protein kinase superfamily protein
T4019362	TraesCSU02G263800	chr2A	774488033	774488272	Vps51/Vps67 family (components of vesicular transport) protein
T4019363	TraesCS7D02G256000	chr2A	774488271	774488519	Ras-related small GTP-binding family protein
T4019364	TraesCS4B02G124900	chr2A	774491726	774491998	30S ribosomal protein S15
T4019365	TraesCSU02G254600	chr2A	774494654	774494854	Protein kinase superfamily protein
T4019366	TraesCSU02G263800	chr2A	774495248	774495487	Vps51/Vps67 family (components of vesicular transport) protein
T4019367	TraesCS7D02G256000	chr2A	774495486	774495734	Ras-related small GTP-binding family protein
T4019368	TraesCS4B02G124900	chr2A	774499102	774499374	30S ribosomal protein S15
T4019369	TraesCSU02G254600	chr2A	774502030	774502230	Protein kinase superfamily protein
T4019370	TraesCSU02G263800	chr2A	774502624	774502863	Vps51/Vps67 family (components of vesicular transport) protein
T4019371	TraesCS7D02G256000	chr2A	774502862	774503110	Ras-related small GTP-binding family protein
T4019372	TraesCS4B02G124900	chr2A	774506483	774506755	30S ribosomal protein S15
T4019373	TraesCSU02G254600	chr2A	774509411	774509611	Protein kinase superfamily protein
T4019374	TraesCSU02G263800	chr2A	774510005	774510244	Vps51/Vps67 family (components of vesicular transport) protein
T4019375	TraesCS7D02G256000	chr2A	774510243	774510491	Ras-related small GTP-binding family protein
T4019376	TraesCS4B02G124900	chr2A	774514046	774514318	30S ribosomal protein S15
T4019377	TraesCSU02G254600	chr2A	774516974	774517174	Protein kinase superfamily protein
T4019378	TraesCSU02G263800	chr2A	774517568	774517807	Vps51/Vps67 family (components of vesicular transport) protein
T4019379	TraesCS7D02G256000	chr2A	774517806	774518054	Ras-related small GTP-binding family protein
T4019380	TraesCS4B02G124900	chr2A	774521630	774521902	30S ribosomal protein S15
T4019381	TraesCSU02G254600	chr2A	774524558	774524758	Protein kinase superfamily protein
T4019382	TraesCSU02G263800	chr2A	774525152	774525391	Vps51/Vps67 family (components of vesicular transport) protein
T4019383	TraesCS7D02G256000	chr2A	774525390	774525638	Ras-related small GTP-binding family protein
T4019384	TraesCS4B02G124900	chr2A	774529238	774529510	30S ribosomal protein S15
T4019385	TraesCSU02G254600	chr2A	774532166	774532366	Protein kinase superfamily protein
T4019386	TraesCSU02G263800	chr2A	774532760	774532999	Vps51/Vps67 family (components of vesicular transport) protein
T4019387	TraesCS7D02G256000	chr2A	774532998	774533246	Ras-related small GTP-binding family protein
T4019389	TraesCS4B02G124900	chr2A	774537214	774537486	30S ribosomal protein S15
T4019390	TraesCSU02G254600	chr2A	774540142	774540342	Protein kinase superfamily protein
T4019391	TraesCSU02G263800	chr2A	774540736	774540975	Vps51/Vps67 family (components of vesicular transport) protein
T4019392	TraesCS7D02G256000	chr2A	774540974	774541222	Ras-related small GTP-binding family protein
T4019394	TraesCS4B02G124900	chr2A	774545316	774545588	30S ribosomal protein S15
T4019395	TraesCSU02G254600	chr2A	774548244	774548444	Protein kinase superfamily protein
T4019396	TraesCSU02G263800	chr2A	774548838	774549077	Vps51/Vps67 family (components of vesicular transport) protein
T4019397	TraesCS7D02G256000	chr2A	774549076	774549324	Ras-related small GTP-binding family protein
T4019398	TraesCS7D02G124000	chr2A	774551002	774551373	histone deacetylase 2
T4019399	TraesCS4B02G124900	chr2A	774553427	774553699	30S ribosomal protein S15
T4019400	TraesCSU02G254600	chr2A	774556355	774556555	Protein kinase superfamily protein
T4019401	TraesCSU02G263800	chr2A	774556949	774557188	Vps51/Vps67 family (components of vesicular transport) protein
T4019402	TraesCS7D02G256000	chr2A	774557187	774557435	Ras-related small GTP-binding family protein
T4019403	TraesCS7D02G124000	chr2A	774559113	774559484	histone deacetylase 2
T4019404	TraesCS4B02G124900	chr2A	774561709	774561981	30S ribosomal protein S15
T4019406	TraesCSU02G263800	chr2A	774565231	774565470	Vps51/Vps67 family (components of vesicular transport) protein
T4019407	TraesCS7D02G124000	chr2A	774567395	774567766	histone deacetylase 2
T4019408	TraesCSU02G263800	chr2A	774569725	774569965	Vps51/Vps67 family (components of vesicular transport) protein
T4019447	TraesCS3A02G190400	chr2A	776769913	776770176	GRF zinc finger family protein
T4019464	TraesCS2A02G500700	chr2A	777572000	777573691	Receptor-like protein kinase
T4019503	TraesCS2A02G505000	chr2A	782247060	782249676	Sucrose transporter
T4019553	TraesCSU02G272200	chr2A	783943132	783943428	NADH dehydrogenase subunit 2
T4019579	TraesCS2A02G512300	chr2A	786115621	786116812	No-apical-meristem-associated carboxy-terminal domain protein
T4019601	TraesCS2A02G513300	chr2A	787491000	787491640	DNA topoisomerase, type IA, core
T4019648	TraesCS2A02G518300	chr2A	791250162	791253380	CsAtPR5
T4019770	TraesCS2A02G530500	chr2A	797633141	797634301	Myb/SANT-like DNA-binding domain protein
T4019812	TraesCS2A02G534200	chr2A	799542489	799543510	Transcription factor
T4019813	TraesCS2A02G534300	chr2A	799552884	799554301	Transcription factor
T4019814	TraesCS2A02G534200	chr2A	799577807	799578828	Transcription factor
T4019815	TraesCS2A02G534300	chr2A	799588202	799589619	Transcription factor
T4019824	TraesCS2A02G535100	chr2A	799935991	799937600	Serine/threonine-protein kinase
T4019825	TraesCS2A02G535200	chr2A	799951691	799952689	Serine/threonine-protein kinase
T4019826	TraesCS2A02G535200	chr2A	799970563	799971561	Serine/threonine-protein kinase
T4019828	TraesCS2A02G535400	chr2A	800033471	800033894	Pre-mRNA-splicing factor SYF2
T4019833	TraesCS2A02G535700	chr2A	800142010	800144493	Ubiquitin carboxyl-terminal hydrolase 2
T4019846	TraesCS2A02G536800	chr2A	800423721	800424276	Serine/threonine-protein kinase
T4019848	TraesCS2A02G536900	chr2A	800614981	800616009	Flowering Locus T-like protein, putative
T4019849	TraesCS1B02G301200	chr2A	800667587	800669498	Peptide methionine sulfoxide reductase msrB
T4019957	TraesCS5B02G443400	chr2A	805959070	805960221	Pathogenesis-related protein 1
T4019958	TraesCS5B02G443500	chr2A	805970379	805970876	Pathogenesis-related protein 1
T4019959	TraesCS2A02G546500	chr2A	806012527	806013469	Cytochrome P450 family protein, expressed
T4019960	TraesCS2A02G546500	chr2A	806023472	806024414	Cytochrome P450 family protein, expressed
T4019984	TraesCS3A02G466100	chr2A	808496773	808497329	UPF0210 protein BLA_0552
T4020023	TraesCSU02G210000	chr2A	809723680	809726023	disease resistance protein (TIR-NBS-LRR class) family
T4020061	TraesCS2A02G554400	chr2A	811803153	811808828	ATP-dependent RNA helicase DRS1
T4020063	TraesCS2A02G554700	chr2A	811856587	811856994	Thioredoxin
T4020064	TraesCS2A02G554800	chr2A	811863708	811864442	F-box domain containing protein-like
T4020065	TraesCSU02G216900	chr2A	812095091	812095453	ARM repeat superfamily protein
T4020066	TraesCSU02G216900	chr2A	812113324	812113686	ARM repeat superfamily protein
T4020073	TraesCSU02G207800	chr2A	812444125	812445252	glucan synthase-like 9
T4020081	TraesCSU02G137500	chr2A	812805549	812806382	Germin-like protein
T4020082	TraesCSU02G137600	chr2A	812829597	812831380	Core-2/I-branching beta-1,6-N-acetylglucosaminyltransferase family protein
T4020086	TraesCS2A02G558000	chr2A	813170577	813171255	Chitinase
T4020123	TraesCSU02G215800	chr2A	814897434	814898840	NAC domain protein
T4020137	TraesCS2A02G563000	chr2A	815805683	815806930	F-box family protein
T4020138	TraesCS2A02G563100	chr2A	815834384	815835374	30S ribosomal protein S17
T4020169	TraesCS2A02G565400	chr2A	817771448	817774638	1-deoxy-D-xylulose 5-phosphate synthase
T4020201	TraesCS2A02G568600	chr2A	819822634	819824880	CsAtPR5
T4020281	TraesCS6A02G022500	chr2A	824445581	824448015	28S ribosomal S34, mitochondrial
T4020370	TraesCS2A02G584600	chr2A	830190267	830193410	WAT1-related protein
T4020371	TraesCS2A02G584700	chr2A	830195963	830197544	Calcium-dependent lipid-binding domain-containing protein
T4020454	TraesCS2A02G593100	chr2A	835062552	835063738	Glycerol-3-phosphate acyltransferase
T4020554	TraesCSU02G211300	chr2B	5356299	5356676	protein kinase family protein
T4020582	TraesCS2B02G011200	chr2B	6599912	6601703	Leucine-rich repeat receptor-like kinase
T4020583	TraesCS2B02G011200	chr2B	6608927	6610718	Leucine-rich repeat receptor-like kinase
T4020600	TraesCS2B02G012700	chr2B	6936011	6941220	Homeobox leucine zipper protein
T4020687	TraesCS2B02G019800	chr2B	10171089	10175945	NBS-LRR disease resistance protein-like protein
T4020694	TraesCSU02G011800	chr2B	10982316	10983176	translocon at the outer envelope membrane of chloroplasts 159
T4020775	TraesCS2B02G029000	chr2B	14869586	14871615	Serine/threonine-protein kinase
T4020776	TraesCS2B02G029100	chr2B	14872576	14874045	Glycosyltransferase
T4020821	TraesCS2B02G033200	chr2B	17521347	17521733	Cytochrome P450 family protein
T4020824	TraesCS2B02G033200	chr2B	17648520	17648906	Cytochrome P450 family protein
T4020827	TraesCSU02G233900	chr2B	17783328	17785176	Cytochrome P450
T4020912	TraesCS2B02G040700	chr2B	20874587	20879874	Agenet domain, putative
T4020913	TraesCS2B02G040700	chr2B	20913192	20918479	Agenet domain, putative
T4020914	TraesCS2B02G042000	chr2B	21036714	21038656	Glycosyltransferase
T4020948	TraesCSU02G155700	chr2B	24413063	24414236	Leucine-rich repeat-containing protein 41
T4020960	TraesCS2A02G073900	chr2B	25034462	25034698	Photosystem II CP43 reaction center protein
T4020986	TraesCS2B02G048900	chr2B	25795453	25797041	HXXXD-type acyl-transferase family protein
T4020987	TraesCS2B02G049000	chr2B	25805437	25806301	Plant invertase/pectin methylesterase inhibitor superfamily protein, putative
T4021066	TraesCS2B02G057600	chr2B	29833749	29838084	NRT1/PTR family protein 2
T4021093	TraesCS2B02G059700	chr2B	30837115	30837381	Rab GTPase-activating protein 1
T4021117	TraesCS2B02G063200	chr2B	32024233	32024796	Invertase inhibitor
T4021118	TraesCS2B02G063200	chr2B	32079630	32080193	Invertase inhibitor
T4021119	TraesCS2B02G063200	chr2B	32114596	32115159	Invertase inhibitor
T4021139	TraesCS2B02G065000	chr2B	33441037	33441429	F-box domain containing protein, expressed
T4021140	TraesCS2B02G065000	chr2B	33474081	33474473	F-box domain containing protein, expressed
T4021144	TraesCS2B02G065300	chr2B	33881474	33888848	Pumilio-like protein
T4021149	TraesCSU02G162000	chr2B	35295428	35297384	Bidirectional sugar transporter SWEET
T4021169	TraesCSU02G236600	chr2B	37360991	37361257	Superoxide dismutase [Cu-Zn] 1
T4021170	TraesCS6B02G355000	chr2B	37521179	37522018	Embryogenesis-associated protein EMB8
T4021182	TraesCSU02G013900	chr2B	39251592	39255981	Disease resistance protein
T4021183	TraesCSU02G013900	chr2B	39266040	39270428	Disease resistance protein
T4021184	TraesCSU02G013900	chr2B	39297158	39301549	Disease resistance protein
T4021192	TraesCS2B02G069661	chr2B	39754894	39755447
T4021241	TraesCSU02G071900	chr2B	44243059	44243289	Inhibitor protein
T4021242	TraesCSU02G071900	chr2B	44257607	44257837	Inhibitor protein
T4021244	TraesCSU02G071900	chr2B	44279563	44279793	Inhibitor protein
T4021324	TraesCS2B02G082000	chr2B	50215864	50216208	Protein kinase family protein
T4021338	TraesCS2B02G083200	chr2B	51203957	51204244	B3 domain-containing protein family
T4021339	TraesCS2B02G083300	chr2B	51213879	51215556	NADP-dependent alkenal double bond reductase
T4021370	TraesCS2B02G086200	chr2B	53127216	53128616	Aspartic proteinase nepenthesin-1
T4021385	TraesCS2B02G088700	chr2B	54974498	54979285	Cytochrome P450 family protein, expressed
T4021415	TraesCS7A02G434000	chr2B	57136483	57137136	Holliday junction ATP-dependent DNA helicase RuvB
T4021529	TraesCS2B02G101200	chr2B	68296069	68300626	Phospho-N-acetylmuramoyl-pentapeptide-transferase
T4021550	TraesCS2B02G103700	chr2B	70466341	70467613	Sulfotransferase
T4021552	TraesCS4A02G367000	chr2B	70726408	70726785	NAD kinase
T4021616	TraesCS2B02G110100	chr2B	77578605	77579068	Defensin
T4021617	TraesCSU02G156000	chr2B	77657485	77657895	Receptor-like protein kinase
T4021618	TraesCSU02G156100	chr2B	77667699	77670161	Receptor-like protein kinase
T4021633	TraesCS2B02G111300	chr2B	79296051	79298620	F-box protein family-like
T4021634	TraesCS2B02G111300	chr2B	79319994	79322563	F-box protein family-like
T4021635	TraesCS2B02G111300	chr2B	79367772	79370341	F-box protein family-like
T4021651	TraesCS2B02G113200	chr2B	83111074	83118098	transcription factor-like protein
T4021706	TraesCS2B02G118600	chr2B	91342258	91346252	Sentrin-specific protease
T4021738	TraesCS2B02G121800	chr2B	96533392	96535361	WRKY transcription factor
T4021796	TraesCS2B02G127300	chr2B	102956245	102956913	NADH-quinone oxidoreductase subunit B
T4021802	TraesCS2B02G128100	chr2B	103211766	103212283	Leucine-rich repeat protein kinase family protein
T4021803	TraesCS2B02G128100	chr2B	103242089	103242605	Leucine-rich repeat protein kinase family protein
T4021804	TraesCS2B02G128100	chr2B	103314576	103315093	Leucine-rich repeat protein kinase family protein
T4021812	TraesCS2B02G128900	chr2B	103551315	103551730	ABC-2 type transporter family protein
T4021846	TraesCSU02G191900	chr2B	106321176	106323730	Terpene cyclase/mutase family member
T4021854	TraesCS2B02G132800	chr2B	107362082	107363124	LURP-one-like protein
T4021864	TraesCS2B02G133700	chr2B	108221449	108221754	Flowering-promoting factor 1-like protein 1
T4021914	TraesCS2B02G138200	chr2B	113686923	113692275	Ubiquitin carboxyl-terminal hydrolase 2
T4021934	TraesCS1A02G165100	chr2B	115295382	115295633	Cytochrome b559 subunit alpha
T4021957	TraesCS2B02G142300	chr2B	118253541	118254157	Glycoprotein hormones alpha chain
T4021969	TraesCS2B02G143300	chr2B	118989128	118989337	Lipoxygenase
T4021992	TraesCS2B02G145600	chr2B	120513176	120514720	phospholipase D alpha 3
T4022006	TraesCS2A02G441300	chr2B	122641230	122643650	Myb family transcription factor family protein
T4022028	TraesCSU02G251800	chr2B	124762713	124763114	DNAse I-like superfamily protein
T4022029	TraesCSU02G240300	chr2B	124765617	124767612	DNAse I-like superfamily protein
T4022041	TraesCS2B02G149700	chr2B	125509304	125510719	Benzyl alcohol O-benzoyltransferase
T4022170	TraesCS3B02G503200	chr2B	145949840	145952049	F-box family protein
T4022274	TraesCSU02G015100	chr2B	158456253	158458016	Peroxidase
T4022275	TraesCSU02G015100	chr2B	158475273	158477036	Peroxidase
T4022279	TraesCS2B02G173700	chr2B	158801264	158801620	RNA-binding (RRM/RBD/RNP motifs) family protein
T4022281	TraesCSU02G014900	chr2B	159119641	159120402	Peroxidase
T4022294	TraesCS2B02G175600	chr2B	161786595	161788532	Chaperone protein DnaJ
T4022295	TraesCS2B02G175500	chr2B	161865392	161869005	Meiosis arrest female protein 1
T4022300	TraesCS2B02G175900	chr2B	162162646	162165448	50S ribosomal protein L7Ae
T4022350	TraesCS2B02G181000	chr2B	166265604	166265966	glutamate synthase 1
T4022354	TraesCS2B02G181200	chr2B	166945322	166946169	Cysteine protease
T4022355	TraesCS2B02G181300	chr2B	166954029	166955246	Y-family DNA polymerase H
T4022393	TraesCS2B02G186300	chr2B	172014149	172015010	Late embryogenesis abundant protein
T4022403	TraesCS2B02G187200	chr2B	173377030	173380362	Trehalose 6-phosphate phosphatase
T4022452	TraesCS2B02G190800	chr2B	178129337	178129447	Dolichyl-diphosphooligosaccharide--protein glycosyltransferase subunit 4
T4022455	TraesCSU02G015200	chr2B	178662246	178663256	Fasciclin-like arabinogalactan-protein-like
T4022461	TraesCS2B02G192100	chr2B	179531912	179532172	Calcium binding family protein
T4022479	TraesCS2B02G194000	chr2B	183195710	183196261	Dirigent protein
T4022517	TraesCS2B02G197300	chr2B	187488915	187492746	Rela/spot homolog 3 family protein
T4022532	TraesCS2B02G199100	chr2B	189487733	189488153	Ankyrin repeat family protein
T4022537	TraesCS2B02G199600	chr2B	190486545	190488930	Heavy metal transport/detoxification superfamily protein
T4022538	TraesCS2B02G199700	chr2B	190492295	190493766	Gibberellin receptor GID1A
T4022545	TraesCS2B02G200200	chr2B	191487386	191487613	lysine ketoglutarate reductase trans-splicing-like protein (DUF707)
T4022546	TraesCS2B02G200300	chr2B	191503664	191504230	EGG APPARATUS-1 protein
T4022591	TraesCS5B02G258500	chr2B	197439210	197439881	F-box protein (DUF295)
T4022606	TraesCS2B02G205200	chr2B	197922978	197923639	IgA FC receptor
T4022614	TraesCS2B02G205900	chr2B	198296971	198298077	IgA FC receptor
T4022627	TraesCS2B02G206700	chr2B	199546786	199547526	Plant invertase/pectin methylesterase inhibitor
T4022628	TraesCS2B02G206800	chr2B	199550084	199551936	Pentatricopeptide repeat-containing family protein
T4022664	TraesCS2B02G210900	chr2B	208420328	208421701	Short-chain dehydrogenase/reductase
T4022694	TraesCS2B02G214200	chr2B	212528070	212528600	Ribosomal RNA small subunit methyltransferase A
T4022695	TraesCS2B02G214100	chr2B	212540052	212548733	SUMO-activating enzyme 2
T4022696	TraesCS2B02G214200	chr2B	212549577	212550107	Ribosomal RNA small subunit methyltransferase A
T4022727	TraesCS2B02G217200	chr2B	218980504	218981492	maternal effect embryo arrest 60
T4022738	TraesCS2B02G056800	chr2B	220109728	220115123	Formin-like protein
T4022739	TraesCS2B02G056900	chr2B	220118107	220121466	Histone acetyltransferase
T4022740	TraesCS2B02G057000	chr2B	220123446	220132334	Mortality factor 4-like protein 1
T4022741	TraesCS2B02G057100	chr2B	220138252	220140462	Cytochrome P450 family protein
T4022752	TraesCS2B02G218300	chr2B	221658489	221660331	Polyol transporter
T4022755	TraesCS7B02G335300	chr2B	222041323	222043660	RNA-binding protein
T4022771	TraesCS2B02G220100	chr2B	225192739	225194653	Chlorophyll a-b binding protein, chloroplastic
T4022772	TraesCS2B02G220200	chr2B	225204265	225207380	Ubiquitin-conjugating enzyme E2, putative
T4022773	TraesCS2B02G220300	chr2B	225208387	225211353	Glucan endo-1,3-beta-glucosidase, putative
T4022789	TraesCS2B02G221900	chr2B	226262934	226264008	CELLULOSE SYNTHASE INTERACTIVE 3
T4022797	TraesCS2A02G247400	chr2B	226998359	227000387	Blue copper protein
T4022809	TraesCS2B02G224200	chr2B	228653938	228655881	Protein BRICK 1-like protein
T4022811	TraesCS2B02G224000	chr2B	229015526	229018078	Phenylalanine ammonia-lyase
T4022816	TraesCS4A02G236700	chr2B	229092371	229094593	Cyclin
T4022817	TraesCS2B02G224000	chr2B	229128521	229131073	Phenylalanine ammonia-lyase
T4022818	TraesCS2B02G224100	chr2B	229132103	229134325	Pentatricopeptide repeat-containing protein
T4022820	TraesCS2B02G224300	chr2B	229160340	229162995	Phenylalanine ammonia-lyase
T4022821	TraesCS2B02G224400	chr2B	229163350	229166993	Ubiquitin thioesterase
T4022839	TraesCS2B02G225700	chr2B	231721275	231722758	TNFAIP3-interacting protein 1
T4022861	TraesCS2B02G227700	chr2B	237453118	237457603	Receptor kinase
T4022881	TraesCS2B02G229800	chr2B	241202157	241206949	Bromodomain protein
T4022885	TraesCS2B02G229800	chr2B	241432179	241436971	Bromodomain protein
T4022891	TraesCS2A02G369400	chr2B	242121641	242122928	Tropinone reductase-like protein
T4022914	TraesCS2B02G232800	chr2B	247504522	247506820	Armadillo/beta-catenin repeat family protein
T4022919	TraesCS2B02G233000	chr2B	248350951	248352445	Membrane lipoprotein lipid attachment site-containing protein-like
T4022961	TraesCS2B02G237000	chr2B	254929220	254930858	Serine/threonine-protein kinase
T4022962	TraesCS2B02G237000	chr2B	254945986	254947624	Serine/threonine-protein kinase
T4023033	TraesCS2B02G244800	chr2B	265959137	265959826	GDSL esterase/lipase
T4023145	TraesCS2B02G255200	chr2B	309145701	309149889	Actin-depolymerizing factor
T4023166	TraesCS3A02G193000	chr2B	323762771	323763259	Kinase family protein
T4023178	TraesCS2B02G258000	chr2B	331067976	331068958	Ypt/Rab-GAP domain of gyp1p superfamily protein
T4023182	TraesCSU02G198600	chr2B	332894606	332895860	Mediator of rna polymerase ii transcription subunit 33a
T4023183	TraesCSU02G198600	chr2B	332960263	332961517	Mediator of rna polymerase ii transcription subunit 33a
T4023283	TraesCS2B02G267400	chr2B	381996330	381997103	Light-dependent short hypocotyls protein
T4023316	TraesCS2B02G270800	chr2B	391269550	391270023	30S ribosomal protein S8
T4023323	TraesCS7B02G278200	chr2B	393539633	393541348	Thiamine thiazole synthase, chloroplastic
T4023420	TraesCS3B02G094300	chr2B	411903377	411904270	CsAtPR5
T4023437	TraesCS2B02G264400	chr2B	413747307	413747540	Ephrin type-A receptor 1
T4023441	TraesCS2B02G284000	chr2B	413811068	413811811	NADH-ubiquinone oxidoreductase chain 6
T4023475	TraesCS2B02G287000	chr2B	419350458	419352578	Laccase
T4023476	TraesCS2B02G287100	chr2B	419365633	419368441	myosin-M heavy protein
T4023506	TraesCS2B02G290600	chr2B	427074168	427077310	Ubiquitin-like-specific protease ESD4-like protein
T4023528	TraesCS5B02G264200	chr2B	431427354	431427851	Protein kinase superfamily protein
T4023583	TraesCS2B02G298100	chr2B	441172133	441172408	Alanine--tRNA ligase
T4023638	TraesCS2B02G303600	chr2B	453503338	453509400	Jasmonate ZIM domain protein
T4023649	TraesCS2B02G304700	chr2B	457465239	457471346	Lysine--tRNA ligase
T4023704	TraesCS1B02G275500	chr2B	467090154	467094911	DUF630 family protein, putative (DUF630 and DUF632)
T4023723	TraesCS3A02G014900	chr2B	471306147	471310948	Fatty acyl-CoA reductase
T4023763	TraesCS2B02G315900	chr2B	475940482	475943198	Serine/threonine-protein kinase
T4023764	TraesCS2B02G316000	chr2B	475976362	475978773	Serine/threonine-protein kinase
T4023765	TraesCS2B02G316100	chr2B	475980295	475983277	Serine/threonine-protein kinase
T4023820	TraesCS5A02G279300	chr2B	485971159	485971461	GRF zinc finger family protein
T4023850	TraesCS2B02G325300	chr2B	489968394	489969438	Octicosapeptide/Phox/Bem1p domain-containing family protein
T4023905	TraesCS2D02G263900	chr2B	499725185	499725598	sulfate transporter 91
T4023908	TraesCS2B02G330800	chr2B	499732402	499732626	30S ribosomal protein S19, chloroplastic
T4023909	TraesCS2D02G264000	chr2B	499732953	499733450	50S ribosomal protein L2
T4023910	TraesCS2D02G263900	chr2B	499733059	499733472	sulfate transporter 91
T4023913	TraesCS7A02G388100	chr2B	499738021	499738191	NAD(P)H-quinone oxidoreductase subunit 2, chloroplastic
T4023915	TraesCSU02G267100	chr2B	499742877	499743053	Argininosuccinate synthase
T4023995	TraesCS2B02G339400	chr2B	509626053	509626949	Agmatine coumaroyltransferase
T4023996	TraesCS2B02G339500	chr2B	509629303	509630006	Agmatine coumaroyltransferase
T4024025	TraesCS2D02G323100	chr2B	513396200	513398481	RAN guanine nucleotide release factor
T4024026	TraesCS2B02G341900	chr2B	513563269	513563556	B3 domain-containing protein family
T4024032	TraesCS2B02G342500	chr2B	514179928	514183930	ATP-dependent RNA helicase
T4024047	TraesCS2B02G343800	chr2B	515619367	515622124	MYB transcription factor
T4024048	TraesCS2B02G343900	chr2B	515640869	515642492	30S ribosomal protein 3, chloroplastic
T4024063	TraesCS2B02G345200	chr2B	517970705	517973429	Pentatricopeptide repeat-containing family protein
T4024064	TraesCS2B02G345300	chr2B	517973213	517975425	Vacuolar iron transporter-like protein
T4024065	TraesCS2B02G345400	chr2B	517975737	517978717	Anthranilate synthase
T4024072	TraesCS2B02G346000	chr2B	518637220	518640682	Aldehyde dehydrogenase
T4024092	TraesCS5B02G546300	chr2B	520510327	520512113	Esterase/lipase/thioesterase family protein
T4024101	TraesCS3B02G119800	chr2B	521445395	521448647	Pyruvate decarboxylase
T4024152	TraesCS2B02G354100	chr2B	530349099	530350675	2-oxoglutarate-dependent dioxygenase
T4024155	TraesCS2B02G354300	chr2B	531037565	531041182	F-box protein
T4024166	TraesCS2B02G355100	chr2B	532030366	532030854	vacuolar iron transporter (VIT) family protein
T4024167	TraesCS2B02G355200	chr2B	532049397	532051085	Pentatricopeptide repeat-containing protein
T4024174	TraesCS5B02G544900	chr2B	533482368	533486864	Receptor-like protein kinase
T4024177	TraesCS3B02G201000	chr2B	533756650	533759197	Hepatocyte nuclear factor 6
T4024227	TraesCS2B02G360400	chr2B	539942837	539947744	Programmed cell death protein 4
T4024239	TraesCS2B02G361100	chr2B	541209301	541212060	Short-chain dehydrogenase/reductase
T4024263	TraesCS2D02G343400	chr2B	545021402	545022736	F-box family protein
T4024269	TraesCS7B02G071600	chr2B	545752304	545753260	Zinc finger protein-like
T4024305	TraesCS2B02G369000	chr2B	553556811	553558117	Chitinase
T4024323	TraesCS2B02G370500	chr2B	555411625	555413224	Myosin-1
T4024352	TraesCS2D02G353300	chr2B	559286946	559287920	Tetratricopeptide repeat (TPR)-like superfamily protein
T4024401	TraesCS2B02G378700	chr2B	570275436	570276488	Nuclear transcription factor Y subunit B
T4024404	TraesCS2B02G378900	chr2B	570637590	570640312	Protein trichome birefringence
T4024411	TraesCS2B02G379700	chr2B	571717364	571718608	Sialyltransferase-like protein 2
T4024419	TraesCS2B02G380600	chr2B	573436746	573440279	GDSL esterase/lipase
T4024432	TraesCS2B02G381900	chr2B	574008170	574009900	Lung seven transmembrane receptor, putative
T4024495	TraesCS2B02G387800	chr2B	580043062	580045939	MYB transcription factor
T4024510	TraesCS2B02G389100	chr2B	581465759	581468093	Calcium-dependent lipid-binding domain-containing protein
T4024530	TraesCS5A02G352100	chr2B	584889650	584891889	High mobility group family
T4024566	TraesCSU02G205900	chr2B	589543186	589544891	O-methyltransferase-like protein
T4024573	TraesCS2B02G395900	chr2B	590556469	590560390	Oxygen-evolving enhancer protein 3-2
T4024585	TraesCS5B02G449400	chr2B	592916102	592916737	Divalent ion symporter
T4024658	TraesCS2B02G405100	chr2B	602139998	602140309	Indole-3-acetic acid-induced protein ARG7
T4024659	TraesCS2B02G405200	chr2B	602140436	602145748	Kinesin-like protein
T4024660	TraesCS2B02G405300	chr2B	602148752	602154178	BRCT domain-containing protein
T4024666	TraesCS2B02G405700	chr2B	603074073	603074966	Homeobox-leucine zipper family protein
T4024700	TraesCS2B02G408900	chr2B	610847218	610852753	Casein kinase II subunit beta
T4024701	TraesCS2B02G408800	chr2B	610894544	610902818	Eukaryotic translation initiation factor 4G
T4024703	TraesCS1D02G229600	chr2B	611139225	611143144	Phosphatase 2C family protein
T4024715	TraesCS2B02G410000	chr2B	613496583	613499032	Cyclin-like
T4024716	TraesCS2B02G410000	chr2B	613508268	613510717	Cyclin-like
T4024796	TraesCS3B02G130300	chr2B	626693432	626694203	Heat shock protein
T4024801	TraesCS3B02G263900	chr2B	628089817	628090297	DUF538 family protein (Protein of unknown function, DUF538)
T4024834	TraesCS2B02G421300	chr2B	635625404	635626606	Tetratricopeptide repeat (TPR)-like superfamily protein
T4024873	TraesCS2B02G425900	chr2B	641354983	641355381	Lysine-specific histone demethylase 1
T4024909	TraesCS6A02G201100	chr2B	646440732	646444675	Zinc finger family protein
T4024915	TraesCS2B02G429800	chr2B	646802660	646805195	CsAtPR5
T4024995	TraesCS2B02G437600	chr2B	659437638	659439453	Terpene cyclase/mutase family member
T4025099	TraesCS7B02G392400	chr2B	671006333	671008155	Aspartic proteinase nepenthesin-2
T4025106	TraesCS2B02G449400	chr2B	672457209	672461198	Pumilio-like protein
T4025119	TraesCS2B02G450100	chr2B	673683253	673687814	Cytochrome P450
T4025162	TraesCS2B02G455400	chr2B	680676287	680677604	Xyloglucan endotransglucosylase/hydrolase
T4025236	TraesCS6B02G428800	chr2B	687784691	687785242	Defensin
T4025256	TraesCSU02G068600	chr2B	690454527	690458326	Pentatricopeptide repeat-containing protein
T4025272	TraesCS2B02G466100	chr2B	692862840	692866604	RNA-binding protein 39
T4025273	TraesCS2B02G466200	chr2B	692867283	692867638	Transmembrane protein, putative
T4025274	TraesCS2B02G466100	chr2B	692887910	692891674	RNA-binding protein 39
T4025275	TraesCS2B02G466200	chr2B	692892353	692892708	Transmembrane protein, putative
T4025293	TraesCS3B02G104700	chr2B	695257800	695260911	Trichome birefringence-like protein
T4025312	TraesCS2B02G469700	chr2B	697449805	697453329	Basic helix-loop-helix transcription factor
T4025321	TraesCS2B02G470400	chr2B	698108213	698111645	Low-density receptor-like protein
T4025322	TraesCS2B02G470500	chr2B	698112507	698113055	Zinc finger family protein
T4025323	TraesCS2B02G470600	chr2B	698392261	698393981	AT hook motif DNA-binding family protein
T4025336	TraesCS2B02G471800	chr2B	699744341	699745424	Methyl esterase
T4025337	TraesCS3B02G213000	chr2B	700020701	700024697	Phenazine biosynthesis PhzC/PhzF family protein
T4025360	TraesCS2B02G474500	chr2B	703095838	703097393	Ring finger protein, putative
T4025443	TraesCS2B02G484100	chr2B	713018294	713020898	NAC domain-containing protein
T4025563	TraesCS5B02G287400	chr2B	725644075	725644653	Cytochrome P450
T4025628	TraesCS2B02G502600	chr2B	730673721	730674301	Cysteine proteinase inhibitor
T4025629	TraesCS2B02G502700	chr2B	730685271	730685882	callose synthase 1
T4025641	TraesCS2B02G503800	chr2B	731476575	731478726	F-box domain containing protein, expressed
T4025687	TraesCS2B02G509000	chr2B	739058937	739062333	Disease resistance protein (TIR-NBS-LRR class) family
T4025714	TraesCS2B02G511700	chr2B	741329173	741332169	Serine/threonine-protein kinase
T4025747	TraesCS2B02G514700	chr2B	744155139	744155789	Mitochondrial transcription termination factor-like
T4025758	TraesCS5B02G341000	chr2B	745067354	745067908	DUF630 family protein, putative (DUF630 and DUF632)
T4025774	TraesCS3B02G495400	chr2B	747069758	747071378	Aspartic proteinase nepenthesin-1
T4025790	TraesCS2B02G519300	chr2B	749075285	749075770	ABC transporter like protein
T4025792	TraesCS2B02G519400	chr2B	749161582	749161953	Facilitated trehalose transporter Tret1
T4025909	TraesCSU02G217300	chr2B	762527193	762528119	Cyclin
T4025910	TraesCSU02G217300	chr2B	762535830	762536756	Cyclin
T4025917	TraesCS7A02G106900	chr2B	763742353	763743271	Electron transport complex subunit B
T4025940	TraesCS2B02G535500	chr2B	766268490	766271286	Nuclease S1
T4025941	TraesCS2B02G535600	chr2B	766288875	766290564	3-ketoacyl-CoA synthase
T4025948	TraesCS7D02G532900	chr2B	766800632	766801471	DUF241 domain protein (DUF241)
T4025989	TraesCS2B02G539300	chr2B	769959798	769964521	cofactor assembly of complex C
T4025990	TraesCS2B02G539400	chr2B	769965854	769967473	UDP-glycosyltransferase
T4026040	TraesCS2B02G545400	chr2B	777254522	777256549	CRIB domain-containing protein RIC10
T4026049	TraesCS2B02G546100	chr2B	777878500	777880465	Heavy metal transport/detoxification superfamily protein
T4026050	TraesCS2B02G546200	chr2B	777879075	777879272	gibberellin 3-oxidase 1
T4026079	TraesCS2B02G297500	chr2B	780053853	780057505	Sterile alpha motif (SAM) domain-containing protein
T4026081	TraesCS2B02G549100	chr2B	780242830	780243377	DNA topoisomerase
T4026120	TraesCS2B02G553200	chr2B	784312359	784313287	F-box family protein
T4026157	TraesCS2B02G557300	chr2B	787204782	787207632	BTB/POZ domain-containing protein
T4026161	TraesCS2B02G557600	chr2B	787823099	787824159	RING/U-box superfamily protein, putative
T4026166	TraesCS2B02G558000	chr2B	787968402	787970023	Cystathionine beta-lyase family protein
T4026175	TraesCS2B02G558900	chr2B	788584959	788585778	Protein AAR2 homolog
T4026196	TraesCS2B02G559700	chr2B	789581572	789582126	Cytochrome P450 family protein, expressed
T4026240	TraesCS2B02G565500	chr2B	792704201	792704455	Calcium-binding EF-hand family protein
T4026256	TraesCS3B02G186800	chr2B	793886897	793887019	wound-responsive family protein
T4026298	TraesCS2B02G570900	chr2B	797314434	797316100	Gibberellin 3-beta-hydroxylase 2
T4026318	TraesCSU02G021200	chr2B	798193964	798194676	Blue copper protein
T4026321	TraesCSU02G252800	chr2B	798221754	798222460	Blue copper protein
T4026323	TraesCSU02G021200	chr2B	798228694	798229406	Blue copper protein
T4026348	TraesCS2B02G574300	chr2B	800384180	800385979	Leucine-rich repeat receptor-like protein kinase family
T4026349	TraesCS2B02G574400	chr2B	800396001	800398551	NBS-LRR-like resistance protein
T4026363	TraesCS6B02G422800	chr2B	801385852	801386424	Tudor/PWWP/MBT domain-containing protein
T4026395	TraesCS1A02G315000	chr2B	803324986	803325863	Myb/SANT-like DNA-binding domain protein
T4026433	TraesCS2B02G581800	chr2B	806437203	806437680	Pathogenesis-related protein PR-4
T4026443	TraesCS2B02G579300	chr2B	807468831	807472104	transmembrane protein, putative (DUF594)
T4026444	TraesCS2B02G581000	chr2B	807571770	807573531	Cysteine protease, putative
T4026445	TraesCS2B02G581100	chr2B	807574848	807579653	Leucine-rich repeat receptor-like protein kinase
T4026495	TraesCS2B02G587700	chr2B	812595970	812598161	UvrABC system protein A
T4026499	TraesCS2B02G588100	chr2B	812781191	812783877	CsAtPR5
T4026500	TraesCS2B02G588200	chr2B	812806454	812811728	CsAtPR5
T4026510	TraesCS2B02G589500	chr2B	813254872	813255141	Thioredoxin-like protein 4A
T4026549	TraesCSU02G213000	chr2B	815608417	815610300	Cytochrome P450 family protein, expressed
T4026550	TraesCSU02G213000	chr2B	815633845	815635728	Cytochrome P450 family protein, expressed
T4026610	TraesCS2B02G598300	chr2B	819196154	819198865	F-box family protein
T4026645	TraesCS2B02G602100	chr2B	823015349	823018531	RNA pyrophosphohydrolase
T4026668	TraesCS2B02G603700	chr2B	824507532	824508499	Low temperature and salt responsive protein
T4026683	TraesCS2B02G605100	chr2B	825009179	825017357	transmembrane protein
T4026718	TraesCS2B02G608700	chr2B	827916962	827918118	F-box domain containing protein, expressed
T4026787	TraesCSU02G176800	chr2B	832877841	832880276	Kinase, putative
T4026798	TraesCS2B02G617700	chr2B	833241088	833250459	MYB-related transcription factor
T4026800	TraesCS2B02G617800	chr2B	833277893	833278267	Disease resistance protein RPM1
T4026801	TraesCS2B02G617800	chr2B	833286857	833287231	Disease resistance protein RPM1
T4026806	TraesCS2B02G617500	chr2B	833560893	833564097	Signal peptidase I, putative
T4026809	TraesCS2B02G617800	chr2B	833616213	833616587	Disease resistance protein RPM1
T4026810	TraesCS2B02G617800	chr2B	833625189	833625563	Disease resistance protein RPM1
T4026811	TraesCS2B02G617800	chr2B	833634058	833634432	Disease resistance protein RPM1
T4026831	TraesCSU02G198500	chr2B	834460175	834463459	Receptor-like protein kinase
T4026911	TraesCSU02G176800	chr2B	839846699	839849134	Kinase, putative
T4026988	TraesCS2D02G002600	chr2D	2291557	2294966	Receptor-like protein kinase
T4026989	TraesCS2D02G002600	chr2D	2307823	2311232	Receptor-like protein kinase
T4027003	TraesCS2D02G005800	chr2D	2591063	2592790	Cytochrome P450 family protein, expressed
T4027004	TraesCS2D02G005900	chr2D	2594455	2594649	Cytochrome P450, putative
T4027005	TraesCS2D02G005800	chr2D	2602658	2604385	Cytochrome P450 family protein, expressed
T4027006	TraesCS2D02G005900	chr2D	2606050	2606244	Cytochrome P450, putative
T4027007	TraesCS2D02G005900	chr2D	2619962	2620156	Cytochrome P450, putative
T4027008	TraesCS2D02G005900	chr2D	2622040	2622234	Cytochrome P450, putative
T4027040	TraesCS2D02G005800	chr2D	3487391	3489118	Cytochrome P450 family protein, expressed
T4027041	TraesCS2D02G005900	chr2D	3490789	3490983	Cytochrome P450, putative
T4027157	TraesCS2D02G016000	chr2D	9069679	9071049	Cytochrome P450
T4027158	TraesCS2D02G016100	chr2D	9102877	9105243	Chalcone synthase
T4027159	TraesCS2D02G016200	chr2D	9108747	9110283	Chalcone synthase
T4027206	TraesCS2D02G023000	chr2D	11004110	11007398	CDT1-like protein a, chloroplastic
T4027207	TraesCS2D02G023100	chr2D	11010007	11012619	Myrcene synthase, chloroplastic
T4027254	TraesCS2D02G028800	chr2D	12525396	12529451	6-phospho-beta-galactosidase
T4027255	TraesCS2D02G028900	chr2D	12529646	12531143	2-oxoglutarate (2OG) and Fe(II)-dependent oxygenase superfamily protein, putative
T4027283	TraesCS2D02G032700	chr2D	13483878	13486408	Carboxymethylenebutenolidase-like protein
T4027295	TraesCS2D02G032700	chr2D	13634798	13637329	Carboxymethylenebutenolidase-like protein
T4027296	TraesCS2D02G032800	chr2D	13638689	13639279	GroES-like zinc-binding alcohol dehydrogenase family protein
T4027331	TraesCS2D02G036400	chr2D	14698489	14703697	Subtilisin-like protease
T4027333	TraesCS2D02G037400	chr2D	14756283	14767698	Beta-glucosidase
T4027339	TraesCS2D02G037500	chr2D	14866670	14867083	CDS_ERF
T4027340	TraesCS2D02G037600	chr2D	14877948	14883244	RING/U-box superfamily protein
T4027341	TraesCS2D02G037700	chr2D	14890965	14898104	tRNA/tmRNA (Uracil-C(5))-methyltransferase
T4027363	TraesCS2D02G040200	chr2D	15638217	15638987	Ethylene-responsive transcription factor
T4027366	TraesCS2D02G040500	chr2D	15736152	15737681	Embryogenesis transmembrane protein-like
T4027382	TraesCS2D02G041400	chr2D	16045177	16046827	Disease resistance protein
T4027391	TraesCS2D02G042500	chr2D	16432923	16434586	Bidirectional sugar transporter SWEET
T4027401	TraesCS2D02G043600	chr2D	17017950	17024189	ELMO domain containing protein
T4027432	TraesCSU02G224200	chr2D	18665124	18665465	Flowering-promoting factor 1-like protein 1
T4027449	TraesCS2D02G047600	chr2D	19306548	19306763	Duplicated homeodomain-like superfamily protein
T4027479	TraesCS2D02G050100	chr2D	20715786	20717052	Dirigent protein
T4027514	TraesCSU02G127500	chr2D	23232668	23233852	Importin subunit alpha
T4027515	TraesCS2D02G052700	chr2D	23292864	23294609	FAD-binding Berberine family protein
T4027527	TraesCS2D02G053700	chr2D	23991030	23991398	Cysteine protease, putative
T4027551	TraesCSU02G161300	chr2D	25281414	25281854	Germin-like protein
T4027573	TraesCSU02G217200	chr2D	26110824	26111829	F-box protein PP2
T4027574	TraesCSU02G217200	chr2D	26138054	26139059	F-box protein PP2
T4027575	TraesCSU02G217200	chr2D	26166453	26167458	F-box protein PP2
T4027576	TraesCS2D02G057700	chr2D	26178898	26181389	receptor kinase 1
T4027577	TraesCSU02G217200	chr2D	26197983	26198988	F-box protein PP2
T4027586	TraesCS2D02G058000	chr2D	26435511	26437291	Cystathionine gamma-synthase
T4027638	TraesCS2D02G063300	chr2D	31500090	31500425	E3 ubiquitin-protein ligase
T4027701	TraesCS2D02G071000	chr2D	34131646	34132899	Two-component response regulator
T4027726	TraesCS6D02G354900	chr2D	34742660	34743141	tryptophan aminotransferase related 2
T4027728	TraesCS6D02G354900	chr2D	34882147	34882628	tryptophan aminotransferase related 2
T4027741	TraesCS2D02G074500	chr2D	36181771	36184335	carboxyl-terminal peptidase, putative (DUF239)
T4027742	TraesCS2D02G074600	chr2D	36194938	36196491	F-box family protein
T4027761	TraesCS2D02G076400	chr2D	36923906	36925363	Strictosidine synthase
T4027762	TraesCS2D02G076400	chr2D	36940847	36942304	Strictosidine synthase
T4027770	TraesCS2D02G076200	chr2D	37243886	37245237	Strictosidine synthase
T4027771	TraesCS2D02G076300	chr2D	37279724	37281405	Strictosidine synthase
T4027772	TraesCS2D02G076400	chr2D	37283778	37285235	Strictosidine synthase
T4027773	TraesCS2D02G076400	chr2D	37307374	37308831	Strictosidine synthase
T4027786	TraesCS2D02G077500	chr2D	37862738	37865853	actin cross-linking protein, putative (DUF569)
T4027807	TraesCSU02G270000	chr2D	38843322	38843567	Photosystem I iron-sulfur center
T4027810	TraesCS2D02G078800	chr2D	38956299	38957683	Expansin protein
T4027811	TraesCS2D02G079500	chr2D	38972897	38974005	RING/U-box superfamily protein
T4027872	TraesCS2D02G085400	chr2D	42548627	42551130	NADH-quinone oxidoreductase subunit A
T4027879	TraesCS2D02G086100	chr2D	42832116	42834306	Pyruvate decarboxylase
T4027948	TraesCS2D02G092100	chr2D	50473747	50475879	Protein COBRA, putative
T4027985	TraesCS2D02G096100	chr2D	55223308	55223875	Cellulose synthase
T4028039	TraesCS1D02G153000	chr2D	61547085	61547673	Cytochrome c oxidase subunit 1
T4028060	TraesCS2D02G102900	chr2D	63629147	63629713	Pectinesterase inhibitor 2
T4028066	TraesCS2D02G103500	chr2D	64238853	64240945	Acid phosphatase 1
T4028095	TraesCS2D02G105600	chr2D	66000916	66002145	transcription repressor
T4028096	TraesCS2D02G106100	chr2D	66080452	66081958	F-box domain containing protein
T4028105	TraesCS2D02G107000	chr2D	67998088	67999124	Serine/threonine protein phosphatase 7 long form isogeny
T4028165	TraesCS2D02G113200	chr2D	71422379	71427575	THUMP domain-containing protein 1
T4028184	TraesCS2D02G116200	chr2D	73524438	73526658	Small ribosomal subunit biogenesis GTPase RsgA
T4028220	TraesCS2D02G119300	chr2D	78445655	78446738	FBD-like domain family protein
T4028221	TraesCS2D02G119400	chr2D	78447776	78449107	Aspartic proteinase nepenthesin
T4028248	TraesCS2D02G122400	chr2D	81504544	81507172	glucan synthase-like 10
T4028249	TraesCS2D02G122500	chr2D	81516722	81519411	Plasma membrane fusion protein PRM1
T4028256	TraesCS2D02G123300	chr2D	82119489	82122814	Superoxide dismutase [Cu-Zn]
T4028260	TraesCS7D02G093500	chr2D	82406424	82408966	F-box family protein
T4028269	TraesCS2D02G124200	chr2D	83088994	83092554	F-box family protein
T4028270	TraesCS2D02G124300	chr2D	83095492	83098938	Kinase family protein
T4028292	TraesCS2D02G125800	chr2D	84146351	84147854	Short-chain dehydrogenase/reductase
T4028293	TraesCS2D02G125900	chr2D	84169491	84171170	Short-chain dehydrogenase/reductase
T4028396	TraesCS2D02G137000	chr2D	92046327	92048007	Protein trichome birefringence
T4028426	TraesCS5D02G379700	chr2D	94071418	94073065	Arogenate dehydratase
T4028437	TraesCS2D02G141300	chr2D	94599991	94601933	cytochrome-c oxidase/ electron carrier
T4028444	TraesCS6D02G283100	chr2D	95552763	95553026	PAP/OAS1 substrate-binding domain superfamily
T4028462	TraesCSU02G183300	chr2D	97257229	97259949	Beta-1,3-N-acetylglucosaminyltransferase radical fringe
T4028475	TraesCS2D02G145400	chr2D	99175125	99177098	Glycoprotein membrane GPI-anchored
T4028498	TraesCS2D02G147700	chr2D	101014940	101015404	BTB/POZ and MATH domain-containing protein 2
T4028499	TraesCS2D02G147800	chr2D	101023908	101026939	ARM repeat superfamily protein
T4028505	TraesCS2D02G148200	chr2D	102184375	102187613	2,3,4,5-tetrahydropyridine-2,6-dicarboxylate N-acetyltransferase
T4028516	TraesCS2D02G149200	chr2D	103424133	103425236	U3 small nucleolar RNA-associated protein 18-like protein
T4028543	TraesCS2D02G152700	chr2D	108247185	108249046	Peroxidase
T4028544	TraesCS2D02G152800	chr2D	108252844	108254174	Peroxidase
T4028581	TraesCS2D02G156300	chr2D	112700396	112701297	Dirigent protein
T4028591	TraesCS2D02G158000	chr2D	114522131	114522391	cyclin-dependent kinase inhibitor
T4028599	TraesCS2D02G158800	chr2D	115467888	115470839	Ras family
T4028604	TraesCS2D02G159200	chr2D	115843419	115845362	TVP38/TMEM64 family membrane protein
T4028663	TraesCS2D02G165700	chr2D	123504350	123504556	Chymotrypsin inhibitor
T4028664	TraesCS2D02G165700	chr2D	123519683	123519889	Chymotrypsin inhibitor
T4028677	TraesCS2D02G167000	chr2D	124776497	124778668	B3 domain-containing protein
T4028679	TraesCS2D02G167000	chr2D	124809126	124811281	B3 domain-containing protein
T4028684	TraesCS2D02G168000	chr2D	125244577	125246752	Heavy-metal-associated domain-containing protein, putative, expressed
T4028725	TraesCS2D02G171400	chr2D	129193423	129193874	Defensin
T4028747	TraesCS1D02G158800	chr2D	131351088	131353366	F-box family protein
T4028759	TraesCS2D02G174900	chr2D	132571235	132572602	Ubiquitin system component CUE protein
T4028778	TraesCS4D02G201500	chr2D	134543575	134544067	Ulp1 protease family, C-terminal catalytic domain containing protein
T4028808	TraesCS2D02G180100	chr2D	139562670	139563822	Embryogenesis transmembrane protein
T4028813	TraesCSU02G117100	chr2D	139762402	139765982	Histone deacetylase complex subunit SAP18
T4028814	TraesCSU02G117000	chr2D	139766536	139769007	Pentatricopeptide repeat-containing protein, putative
T4028815	TraesCSU02G116900	chr2D	139772982	139776579	Linalool synthase, chloroplastic
T4028816	TraesCS7D02G193900	chr2D	139825938	139828265	Pre-mRNA-splicing factor SYF1
T4028817	TraesCS7D02G193800	chr2D	139829507	139830345	Keratin, type II cytoskeletal 3
T4028834	TraesCS2D02G181900	chr2D	141963020	141965255	PI-PLC X domain-containing protein
T4028835	TraesCS2D02G181900	chr2D	141980069	141982304	PI-PLC X domain-containing protein
T4028895	TraesCS2D02G186500	chr2D	147454974	147455501	IgA FC receptor
T4028896	TraesCS2D02G186600	chr2D	147464896	147465584	IgA FC receptor
T4028898	TraesCS2D02G186800	chr2D	147474367	147475040	IgA FC receptor
T4028927	TraesCS2D02G190100	chr2D	150643956	150644398	Basic blue copper protein
T4028933	TraesCS2D02G190900	chr2D	151585003	151586885	transmembrane protein
T4028947	TraesCS2D02G192200	chr2D	153150421	153151903	Microtubule-associated protein tau
T4028948	TraesCS2D02G192300	chr2D	153153623	153154301	Gibberellin regulated protein
T4028958	TraesCS2D02G193800	chr2D	154857181	154862197	Mitotic checkpoint protein BUB3
T4028959	TraesCS2D02G193800	chr2D	154889453	154894469	Mitotic checkpoint protein BUB3
T4028960	TraesCS2D02G193800	chr2D	154919604	154924620	Mitotic checkpoint protein BUB3
T4028982	TraesCS2D02G194600	chr2D	156864856	156869573	BTB/POZ domain-containing protein
T4028987	TraesCS2D02G194900	chr2D	158191112	158191273	Ribosomal protein L2
T4028993	TraesCS2D02G195400	chr2D	159135846	159139632	GDSL esterase/lipase
T4029013	TraesCS2D02G197600	chr2D	161975562	161977878	Kinase, putative
T4029015	TraesCS2D02G197900	chr2D	162182887	162183864	maternal effect embryo arrest 60
T4029048	TraesCSU02G047200	chr2D	169439285	169439983	COBRA-like protein
T4029051	TraesCSU02G047900	chr2D	169632475	169639037	beta-galactosidase
T4029052	TraesCSU02G262700	chr2D	169662212	169663445	Ribulokinase
T4029076	TraesCS2D02G203200	chr2D	172495132	172497653	Receptor-like protein kinase
T4029084	TraesCS3D02G268900	chr2D	172718862	172721975	TSA: Wollemia nobilis Ref_Wollemi_Transcript_14908_3298 transcribed RNA sequence
T4029137	TraesCS2D02G208800	chr2D	180996053	180997247	Cell wall protein
T4029172	TraesCS2D02G212300	chr2D	188793082	188793306	Methionyl-tRNA synthetase
T4029175	TraesCS2D02G212600	chr2D	189027501	189031636	Secretory carrier-associated membrane protein
T4029182	TraesCS7A02G030300	chr2D	192145489	192145836	Seed maturation protein
T4029280	TraesCS5D02G478800	chr2D	208814404	208814637	UDP-N-acetylglucosamine--N-acetylmuramyl-(pentapeptide) pyrophosphoryl-undecaprenol N-acetylglucosamine transferase
T4029304	TraesCS2D02G224100	chr2D	210837934	210840900	Syntaxin, putative
T4029305	TraesCS2D02G224200	chr2D	210840951	210843373	Isocitrate lyase
T4029306	TraesCS2D02G224100	chr2D	210955604	210958570	Syntaxin, putative
T4029308	TraesCS2D02G224200	chr2D	210969068	210971489	Isocitrate lyase
T4029323	TraesCS2D02G225700	chr2D	213252293	213252880	Late embryogenesis abundant hydroxyproline-rich glycoprotein family, putative
T4029341	TraesCS2D02G227500	chr2D	216277992	216279996	ATP-dependent zinc metalloprotease FtsH
T4029364	TraesCS2D02G229900	chr2D	221229912	221232522	Autophagy-related protein
T4029447	TraesCS2D02G193200	chr2D	263592361	263593456	serine/arginine repetitive matrix-like protein
T4029482	TraesCS2D02G240300	chr2D	279859629	279860000	Voltage-gated potassium channel
T4029509	TraesCS3B02G582300	chr2D	295616857	295617129	NADH-quinone oxidoreductase subunit H 1
T4029515	TraesCSU02G270200	chr2D	295622848	295623262	50S ribosomal protein L22
T4029516	TraesCS6D02G080000	chr2D	295623323	295623563	30S ribosomal protein S19, chloroplastic
T4029522	TraesCS3B02G125800	chr2D	295626238	295626807	Protein Ycf2
T4029524	TraesCS3B02G126000	chr2D	295628894	295631138	NAD(P)H-quinone oxidoreductase subunit 2, chloroplastic
T4029525	TraesCSU02G267100	chr2D	295633755	295633931	Argininosuccinate synthase
T4029526	TraesCSU02G270400	chr2D	295633991	295634245	Methionine--tRNA ligase
T4029528	TraesCS3B02G125800	chr2D	295660415	295660984	Protein Ycf2
T4029530	TraesCS3B02G582300	chr2D	295922655	295922928	NADH-quinone oxidoreductase subunit H 1
T4029534	TraesCS2D02G244000	chr2D	295929640	295929879	Vps51/Vps67 family (components of vesicular transport) protein
T4029535	TraesCS7D02G124000	chr2D	295931803	295932174	histone deacetylase 2
T4029578	TraesCS2D02G247300	chr2D	316683714	316683989	NADH-ubiquinone oxidoreductase chain 1
T4029591	TraesCS2D02G229300	chr2D	318143545	318147418	Pentatricopeptide repeat-containing protein
T4029705	TraesCS2D02G260200	chr2D	342296173	342297113	Autophagy-related protein 2
T4029722	TraesCS2D02G261800	chr2D	344601887	344604671	Protein kish
T4029729	TraesCS2D02G262900	chr2D	346363541	346369694	Longifolia protein
T4029745	TraesCS2D02G263900	chr2D	349451776	349452189	sulfate transporter 91
T4029746	TraesCS2D02G264000	chr2D	349451798	349452295	50S ribosomal protein L2
T4029762	TraesCS2D02G265600	chr2D	351112767	351113821	WD repeat-containing 82-B
T4029766	TraesCS2B02G285700	chr2D	351496556	351498996	LA RNA-binding protein
T4029819	TraesCSU02G258700	chr2D	361090332	361090427	Cytochrome b6-f complex subunit 6
T4029820	TraesCS2D02G270900	chr2D	361090604	361090717	Cytochrome b6-f complex subunit 5
T4029821	TraesCS2D02G271000	chr2D	361092057	361092257	50S ribosomal protein L33
T4029822	TraesCS2D02G271100	chr2D	361093262	361093588	50S ribosomal protein L20
T4029868	TraesCS2D02G276000	chr2D	373351466	373354954	Peptidylprolyl isomerase
T4029899	TraesCS2D02G279000	chr2D	378756397	378759996	Sterile alpha motif (SAM) domain-containing protein
T4029914	TraesCS2D02G280400	chr2D	380856606	380857877	Kinase family protein
T4029980	TraesCSU02G022600	chr2D	391050513	391052405	Cytochrome P450
T4029981	TraesCSU02G022700	chr2D	391057344	391059453	Cytochrome P450
T4029999	TraesCS2D02G287400	chr2D	397047063	397052197	Potassium transporter
T4030011	TraesCS2D02G288500	chr2D	399006785	399007090	DNA-(apurinic or apyrimidinic site) lyase
T4030017	TraesCS2D02G289000	chr2D	400188384	400189463	Cytochrome P450 family protein, expressed
T4030061	TraesCS2D02G293300	chr2D	405190062	405193128	30S ribosomal protein S11
T4030084	TraesCS7D02G317000	chr2D	407886630	407887122	ArfGap/RecO-like zinc finger domain-containing protein
T4030107	TraesCS2D02G297800	chr2D	410024934	410026934	Serine/threonine-protein kinase
T4030133	TraesCS2B02G318100	chr2D	413283393	413287038	Cellulose synthase family protein, expressed
T4030134	TraesCS2D02G300800	chr2D	413434977	413439549	Histone-lysine N-methyltransferase
T4030156	TraesCS2D02G302800	chr2D	416716199	416718234	Neutral/alkaline invertase
T4030168	TraesCS2D02G303700	chr2D	418573827	418577749	tRNA-2-methylthio-N(6)-dimethylallyladenosine synthase
T4030169	TraesCS2D02G303800	chr2D	418581100	418583116	Late embryogenesis abundant protein
T4030173	TraesCS2D02G304100	chr2D	419376804	419381778	Peroxidase
T4030204	TraesCS1D02G154600	chr2D	425196516	425197031	Root hair defective 3 GTP-binding protein (RHD3)
T4030242	TraesCS2D02G311800	chr2D	431688214	431690342	Trihelix transcription factor
T4030306	TraesCS2D02G318600	chr2D	438518897	438519358	GSVIVT00005628001, HT7
T4030310	TraesCS2D02G319000	chr2D	439663409	439664701	Replication factor-A-like protein
T4030315	TraesCS2D02G319300	chr2D	440496249	440497067	C2 calcium/lipid-binding domain, CaLB
T4030316	TraesCS2D02G319400	chr2D	440498636	440499001	Glutathione S-transferase T3
T4030324	TraesCS5D02G465700	chr2D	442208864	442209130	Pre-mRNA-splicing ATP-dependent RNA helicase PRP28
T4030326	TraesCS5D02G465500	chr2D	442329251	442332421	Sphingosine-1-phosphate phosphatase 1
T4030327	TraesCS5D02G465400	chr2D	442334107	442339412	Serine/threonine-protein phosphatase
T4030406	TraesCS2D02G328200	chr2D	452913684	452914628	MLP protein
T4030442	TraesCS2D02G332300	chr2D	456617267	456621330	WRKY transcription factor
T4030511	TraesCS2D02G339600	chr2D	465287319	465289278	Peptide methionine sulfoxide reductase MsrA
T4030534	TraesCS2D02G340600	chr2D	466974758	466977166	Cytochrome P450
T4030541	TraesCS2D02G341300	chr2D	467801255	467801578	ECA1 gametogenesis family protein
T4030550	TraesCS2D02G342100	chr2D	469592575	469595598	Short-chain dehydrogenase/reductase
T4030551	TraesCS2D02G342100	chr2D	469620134	469623157	Short-chain dehydrogenase/reductase
T4030556	TraesCS3D02G338200	chr2D	469972555	469974858	30S ribosomal protein S5
T4030557	TraesCS3D02G338300	chr2D	469979932	469981052	Non-specific lipid-transfer protein
T4030566	TraesCS2D02G343600	chr2D	471599474	471599788	PHD zinc finger protein
T4030568	TraesCS2D02G343800	chr2D	471611172	471612465	Transcription initiation factor IIB
T4030662	TraesCSU02G261400	chr2D	483662827	483663889	DUF309 domain protein
T4030663	TraesCSU02G059700	chr2D	483669926	483671232	Late embryogenesis abundant (LEA) hydroxyproline-rich glycoprotein family
T4030671	TraesCS2D02G353900	chr2D	484790479	484790709	Cyst nematode resistance protein-like
T4030679	TraesCS2D02G354600	chr2D	487771575	487774240	Protein phosphatase 2c, putative
T4030680	TraesCS2D02G354700	chr2D	487775063	487775734	NAC domain protein,
T4030704	TraesCS5D02G032400	chr2D	491475000	491476232	Vacuolar protein sorting-associated protein 2-like protein 1
T4030721	TraesCS2D02G358100	chr2D	492620786	492624654	Transporter-related family protein
T4030765	TraesCS5D02G382800	chr2D	500667599	500667922	Transmembrane protein, putative
T4030773	TraesCS2D02G362800	chr2D	501387517	501388176	Disease resistance protein (TIR-NBS-LRR class) family
T4030798	TraesCS2D02G366200	chr2D	503314922	503317602	Ubiquitin carboxyl-terminal hydrolase 2
T4030806	TraesCS2D02G367000	chr2D	504491012	504493080	MYB transcription factor
T4030813	TraesCS2D02G367600	chr2D	504887916	504889579	Short chain dehydrogenase/reductase
T4030830	TraesCS4D02G241900	chr2D	506162866	506166745	Glucan endo-1,3-beta-glucosidase 3
T4030854	TraesCS2D02G371400	chr2D	508643552	508645175	GRAM domain-containing protein / ABA-responsive
T4030879	TraesCS7D02G390500	chr2D	510438535	510439006	myb domain protein 65
T4030882	TraesCS2D02G373100	chr2D	510619794	510623389	Yellow stripe-like transporter 11
T4030883	TraesCS2D02G373200	chr2D	510631843	510632469	Serpin family protein
T4030994	TraesCS2D02G384700	chr2D	524199007	524199306	Phosphoglucosamine mutase
T4031055	TraesCS6B02G115900	chr2D	534132398	534133102	Photosystem II 5 kDa protein, chloroplastic
T4031071	TraesCS2D02G392500	chr2D	536496401	536497687	RING/U-box superfamily protein
T4031079	TraesCS2D02G393100	chr2D	538272745	538275465	E2 ubiquitin-conjugating-like enzyme
T4031097	TraesCSU02G258700	chr2D	543418091	543418186	Cytochrome b6-f complex subunit 6
T4031109	TraesCS2D02G395900	chr2D	544535477	544536544	Growth-regulating factor
T4031151	TraesCS6D02G230200	chr2D	551627629	551628905	C2H2-like zinc finger protein
T4031164	TraesCS2D02G401700	chr2D	554929973	554933744	Cyclin
T4031228	TraesCS2D02G408400	chr2D	562148491	562150655	CsAtPR5
T4031239	TraesCS2D02G409500	chr2D	563058185	563061004	Serine carboxypeptidase family protein, expressed
T4031246	TraesCS3D02G453800	chr2D	563789077	563791475	F-box family protein
T4031313	TraesCS2D02G417400	chr2D	570312854	570313614	cysteine-rich/transmembrane domain A-like protein
T4031335	TraesCS2D02G419200	chr2D	572342481	572344127	F-box protein
T4031344	TraesCS2D02G420100	chr2D	573499267	573500222	SKP1-like protein
T4031373	TraesCS5D02G078000	chr2D	575930290	575930517	Serine/threonine-protein phosphatase 7 long form-like protein
T4031418	TraesCS2D02G429000	chr2D	580132510	580134656	Ribosomal RNA large subunit methyltransferase H
T4031424	TraesCS2D02G429600	chr2D	580884117	580888140	Ubiquitin-specific protease family C19 protein
T4031459	TraesCS2D02G433400	chr2D	584209691	584215824	GDSL esterase/lipase
T4031524	TraesCS2D02G440000	chr2D	589243594	589247673	S-adenosyl-L-methionine-dependent methyltransferases superfamily protein
T4031549	TraesCS3D02G493500	chr2D	592284884	592285531	Centromere O
T4031562	TraesCS2D02G443500	chr2D	594291705	594294760	UV-B-induced protein, chloroplastic
T4031578	TraesCS2D02G444800	chr2D	595760547	595761087	Subtilisin-like protease
T4031579	TraesCS2D02G444900	chr2D	595761124	595766274	E3 ubiquitin-protein ligase RNF14
T4031586	TraesCS2D02G445900	chr2D	596183930	596185248	MYB transcription factor
T4031608	TraesCS2D02G448000	chr2D	597984747	597987859	Basic helix-loop-helix transcription factor
T4031637	TraesCS2D02G450300	chr2D	600585856	600587211	Anthocyanin 5-aromatic acyltransferase
T4031716	TraesCS2D02G458800	chr2D	606384300	606385862	Cinnamoyl-CoA reductase, putative
T4031745	TraesCS2D02G462200	chr2D	609438602	609440056	DTW domain containing protein
T4031757	TraesCS4A02G004700	chr2D	610319193	610322831	Pentatricopeptide repeat-containing protein
T4031758	TraesCS4A02G004600	chr2D	610323181	610327665	Protein WEAK CHLOROPLAST MOVEMENT UNDER BLUE LIGHT 1
T4031759	TraesCS2D02G463200	chr2D	610344333	610345946	Glycosyltransferase
T4031766	TraesCS2D02G464000	chr2D	611144785	611146571	Protein kinase
T4031782	TraesCS2D02G453900	chr2D	613321472	613321762	senescence-associated family protein (DUF581)
T4031783	TraesCS2D02G466300	chr2D	613326645	613328572	Transmembrane protein 45B
T4031792	TraesCS2D02G467000	chr2D	613767490	613769724	Peroxidase
T4031800	TraesCS2A02G467800	chr2D	614175912	614178064	Signal recognition particle 14 kDa protein
T4031801	TraesCS2D02G468000	chr2D	614196698	614197276	Zinc finger (Ran-binding) family protein
T4031808	TraesCS2D02G468600	chr2D	615789617	615791774	Polyphenol oxidase
T4031853	TraesCS5D02G432400	chr2D	619105658	619105828	NAD(P)H-quinone oxidoreductase subunit 2, chloroplastic
T4031855	TraesCS2D02G473100	chr2D	619363436	619367128	AT hook motif DNA-binding family protein
T4031905	TraesCS2D02G478000	chr2D	622086563	622088020	Glycosyltransferase
T4031972	TraesCS2D02G485300	chr2D	628229519	628232725	Serine/threonine-protein kinase
T4031974	TraesCS2D02G485600	chr2D	628719319	628721281	NAD(P)-binding Rossmann-fold superfamily protein
T4031976	TraesCS2D02G485600	chr2D	628850330	628852292	NAD(P)-binding Rossmann-fold superfamily protein
T4031990	TraesCS2D02G486100	chr2D	629540038	629542276	P-loop containing nucleoside triphosphate hydrolases superfamily protein
T4032005	TraesCS2D02G488400	chr2D	630396808	630397621	cotton fiber protein
T4032061	TraesCS6D02G354900	chr2D	634188878	634189359	tryptophan aminotransferase related 2
T4032071	TraesCS7D02G124100	chr2D	634954688	634955126	Ycf68
T4032073	TraesCS7D02G256000	chr2D	634958512	634958760	Ras-related small GTP-binding family protein
T4032074	TraesCSU02G263800	chr2D	634958759	634958998	Vps51/Vps67 family (components of vesicular transport) protein
T4032075	TraesCSU02G254600	chr2D	634959392	634959592	Protein kinase superfamily protein
T4032113	TraesCS2D02G497900	chr2D	636705507	636706333	Heavy metal transport/detoxification superfamily protein
T4032114	TraesCS2D02G498000	chr2D	636710920	636712115	Alpha/beta-Hydrolases superfamily protein, putative
T4032137	TraesCS2D02G500300	chr2D	638462951	638465655	Anthocyanidin reductase
T4032154	TraesCS2D02G502200	chr2D	639856208	639856494	3-isopropylmalate dehydratase large subunit
T4032163	TraesCS2D02G503100	chr2D	640809434	640810215	Ethylene-responsive transcription factor
T4032180	TraesCS2D02G504100	chr2D	642521362	642523304	Flavonoid 3'-hydroxylase
T4032181	TraesCS2D02G504200	chr2D	642526780	642528306	UDP-glycosyltransferase
T4032192	TraesCS2D02G504900	chr2D	643307641	643308826	Glutathione S-transferase
T4032259	TraesCS2D02G511400	chr2D	647219656	647221506	Receptor-like kinase
T4032280	TraesCS2D02G513300	chr2D	650028721	650030752	GDSL esterase/lipase
T4032294	TraesCS2D02G514300	chr2D	651285386	651286483	B3 domain protein (DUF313)
T4032308	TraesCS2D02G514600	chr2D	651878024	651878251	egg cell-secreted-like protein (DUF1278)
T4032334	TraesCS2D02G518400	chr2D	653994566	653995219	Methyltransferase-like protein
T4032355	TraesCS1B02G433600	chr2D	655170475	655171928	B3 domain-containing protein
T4032356	TraesCS1B02G433700	chr2D	655178668	655179463	B12D protein
T4032360	TraesCS2D02G521000	chr2D	655259992	655261568	DUF674 family protein
T4032364	TraesCS2D02G521000	chr2D	655415434	655417010	DUF674 family protein
T4032368	TraesCS2D02G521200	chr2D	655608888	655609853	Angiopoietin-1
T4032369	TraesCS2D02G521200	chr2D	655623270	655624235	Angiopoietin-1
T4032378	TraesCS2D02G522400	chr2D	656932056	656937010	Cullin family protein
T4032396	TraesCS7D02G035800	chr2D	658866865	658869998	Pectin acetylesterase
T4032397	TraesCS7D02G035900	chr2D	658884292	658887035	NBS-LRR disease resistance protein
T4032409	TraesCS2D02G524600	chr2D	659485726	659486829	F-box family protein
T4032446	TraesCS5D02G226600	chr2D	663062805	663069064	Glutamate receptor
T4032447	TraesCS5D02G226700	chr2D	663071406	663080390	Glutamate receptor
T4032481	TraesCS2D02G531900	chr2D	664329318	664329878	Cytochrome P450 family protein, expressed
T4032496	TraesCS2D02G533100	chr2D	664855863	664856138	Wound-responsive family protein
T4032497	TraesCS2D02G533100	chr2D	664861717	664861992	Wound-responsive family protein
T4032561	TraesCS2D02G539100	chr2D	666830133	666834124	Serine/threonine-protein kinase
T4032695	TraesCS2D02G552100	chr2D	675626859	675627730	Pathogenesis-related protein PR-4
T4032707	TraesCS1A02G385100	chr2D	676595034	676595207	Cytochrome c-550
T4032708	TraesCS7D02G124000	chr2D	676599988	676600359	histone deacetylase 2
T4032710	TraesCSU02G270400	chr2D	676604488	676604742	Methionine--tRNA ligase
T4032711	TraesCSU02G267100	chr2D	676604802	676604978	Argininosuccinate synthase
T4032712	TraesCS7A02G387500	chr2D	676607504	676607862	NAD(P)H-quinone oxidoreductase subunit 2, chloroplastic
T4032749	TraesCS3B02G582300	chr2D	678913046	678913318	NADH-quinone oxidoreductase subunit H 1
T4032755	TraesCS2D02G557500	chr2D	679130922	679133274	Endoglucanase
T4032762	TraesCS2D02G558500	chr2D	680289158	680295265	Ankyrin repeat protein-like
T4032791	TraesCS2D02G561400	chr2D	683000447	683001638	Late embryogenesis abundant (LEA) hydroxyproline-rich glycoprotein
T4032810	TraesCS2D02G563100	chr2D	683928637	683930076	Dof zinc finger protein
T4032840	TraesCS2D02G565900	chr2D	684816654	684818057	Flavin-containing monooxygenase
T4032842	TraesCS4D02G214600	chr2D	684920431	684922640	Josephin, putative, expressed
T4032843	TraesCS4D02G214700	chr2D	684923014	684927530	Glycogen synthase
T4032848	TraesCS7A02G388100	chr2D	685374443	685374613	NAD(P)H-quinone oxidoreductase subunit 2, chloroplastic
T4032849	TraesCS3B02G125800	chr2D	685376754	685377323	Protein Ycf2
T4032851	TraesCS2D02G263900	chr2D	685379158	685379571	sulfate transporter 91
T4032852	TraesCS2D02G264000	chr2D	685379180	685379677	50S ribosomal protein L2
T4032860	TraesCS2D02G568000	chr2D	685645963	685647924	NAC domain protein
T4032865	TraesCS2D02G568000	chr2D	685923143	685925104	NAC domain protein
T4032901	TraesCS2D02G571000	chr2D	687655260	687657593	Tubulin folding cofactor B
T4032903	TraesCSU02G169600	chr2D	687822835	687824476	Chitinase
T4032905	TraesCSU02G169600	chr2D	687846941	687848582	Chitinase
T4032992	TraesCS2D02G580300	chr2D	692756157	692759576	CsAtPR5
T4032998	TraesCS2D02G580900	chr2D	693428770	693431236	CsAtPR5
T4033037	TraesCS2D02G584800	chr2D	694503059	694504211	Peroxidase
T4033058	TraesCS5D02G283700	chr2D	695995937	695996311	bZIP transcription factor family protein
T4033098	TraesCS2D02G591100	chr2D	697557114	697558229	U3 small nucleolar RNA-associated protein 18-like protein
T4033149	TraesCS2D02G595400	chr2D	700326884	700327624	Disease resistance protein RPM1
T4033214	TraesCS3A02G000100	chr3A	98124	101484	Subtilisin-like protease
T4033247	TraesCSU02G215600	chr3A	2117780	2118079	Zinc finger protein
T4033271	TraesCS3A02G003700	chr3A	2846670	2847412	Pectinesterase inhibitor
T4033279	TraesCS3A02G005100	chr3A	5390991	5391361	Glutamate--cysteine ligase
T4033283	TraesCS3A02G005100	chr3A	5452957	5453327	Glutamate--cysteine ligase
T4033284	TraesCS3A02G004200	chr3A	6321689	6322059	Glutamate--cysteine ligase
T4033285	TraesCS3A02G004200	chr3A	7142182	7142552	Glutamate--cysteine ligase
T4033286	TraesCS3A02G004500	chr3A	7174804	7175386	Glutamate--cysteine ligase
T4033288	TraesCS3A02G005100	chr3A	7227769	7228139	Glutamate--cysteine ligase
T4033289	TraesCS3A02G005100	chr3A	7255984	7256354	Glutamate--cysteine ligase
T4033293	TraesCS3A02G005300	chr3A	9450453	9452591	B3 domain-containing protein
T4033341	TraesCS3A02G009000	chr3A	12798275	12800139	Receptor kinase-like protein
T4033404	TraesCS3A02G014900	chr3A	14986657	14991458	Fatty acyl-CoA reductase
T4033405	TraesCS3A02G015400	chr3A	15020056	15021954	Galactoside 2-alpha-L-fucosyltransferase
T4033428	TraesCS3A02G017500	chr3A	15834306	15837954	Exostosin-1
T4033430	TraesCS1D02G058800	chr3A	16033240	16036339	Receptor-like protein kinase
T4033515	TraesCS3A02G025400	chr3A	18751939	18753389	GDSL esterase/lipase
T4033527	TraesCS3A02G026700	chr3A	19498940	19502480	Peroxisomal membrane protein PEX14
T4033566	TraesCS3A02G030400	chr3A	21892544	21896748	Ubiquitin-conjugating enzyme E2
T4033579	TraesCS3A02G031100	chr3A	23460681	23462944	E3 ubiquitin-protein ligase
T4033669	TraesCS3A02G041700	chr3A	28875134	28876201	chromatin remodeling 8
T4033720	TraesCS3A02G046300	chr3A	31398204	31398941	Trypsin inhibitor
T4033745	TraesCS3A02G050400	chr3A	33013676	33014104	Histone-lysine N-methyltransferase
T4033748	TraesCS3A02G050700	chr3A	33301634	33303502	GMP synthase [glutamine-hydrolyzing]
T4033749	TraesCS3A02G050600	chr3A	33337938	33338495	auxin response factor 10
T4033766	TraesCS3A02G052400	chr3A	34854378	34854710	Translation initiation factor IF-2
T4033767	TraesCS3A02G052400	chr3A	34908433	34908765	Translation initiation factor IF-2
T4033817	TraesCS3A02G057900	chr3A	41570174	41571708	Basic helix-loop-helix transcription factor
T4033820	TraesCS6A02G409900	chr3A	41865480	41868883	F-box/LRR-repeat protein
T4033821	TraesCS3A02G058000	chr3A	41904455	41905639	Transcription factor
T4033847	TraesCS3A02G060500	chr3A	44131183	44135698	BTB/POZ domain containing protein, expressed
T4033848	TraesCS3A02G060700	chr3A	44147149	44148229	BTB/POZ domain containing protein, expressed
T4033894	TraesCS3A02G065300	chr3A	46243075	46244108	Ubiquitin fusion degradation 1-like protein
T4033936	TraesCS3A02G070400	chr3A	50436356	50442548	Serine protease HTRA1
T4033946	TraesCS3A02G070900	chr3A	51271735	51274164	Acetylornithine aminotransferase, mitochondrial
T4033950	TraesCS1A02G044100	chr3A	52441714	52444270	Transcription factor jumonji (jmjC) domain-containing protein
T4033975	TraesCS7B02G066900	chr3A	54389378	54391248	Anthocyanin 3'-O-beta-glucosyltransferase
T4033979	TraesCS3A02G073800	chr3A	54679974	54684238	NBS-LRR disease resistance protein
T4033980	TraesCS7B02G066900	chr3A	54728108	54729978	Anthocyanin 3'-O-beta-glucosyltransferase
T4034001	TraesCS1B02G044700	chr3A	55904337	55904888	Chloride channel protein
T4034017	TraesCSU02G013800	chr3A	57281682	57282134	cytochrome P450, family 88, subfamily A, polypeptide 3
T4034018	TraesCSU02G013700	chr3A	57283826	57287529	Receptor-kinase, putative
T4034020	TraesCS3A02G077400	chr3A	58706156	58710499	Short-chain dehydrogenase/reductase family protein
T4034022	TraesCS3A02G077400	chr3A	58852258	58856601	Short-chain dehydrogenase/reductase family protein
T4034035	TraesCS3A02G078700	chr3A	60286694	60290316	Receptor-like kinase
T4034045	TraesCS3A02G079400	chr3A	60871203	60873560	Sterol-8,7-isomerase
T4034046	TraesCS3A02G079500	chr3A	60878058	60878978	Lectin receptor kinase
T4034057	TraesCS3A02G080400	chr3A	61445148	61445900	Cytochrome c oxidase subunit 1
T4034078	TraesCS3A02G082300	chr3A	62962036	62966622	Protein trichome birefringence
T4034081	TraesCS3A02G082200	chr3A	63054103	63055849	cysteine-rich RECEPTOR-like kinase
T4034093	TraesCS3A02G083600	chr3A	63595786	63598677	Cytochrome P450
T4034115	TraesCS3A02G085500	chr3A	65098796	65102804	bZIP transcription factor, putative (DUF1664)
T4034169	TraesCS3A02G090400	chr3A	68004516	68007252	ATP-dependent Clp protease ATP-binding subunit
T4034227	TraesCS3A02G096500	chr3A	72178753	72182493	Kinase family protein
T4034233	TraesCS3A02G096900	chr3A	73281610	73282784	pleiotropic drug resistance 13
T4034234	TraesCS3A02G097000	chr3A	73292593	73295817	Disease resistance protein (TIR-NBS-LRR class)
T4034259	TraesCS3A02G099200	chr3A	75467064	75468908	Dehydration-responsive element-binding protein
T4034266	TraesCS3A02G099700	chr3A	75706787	75708318	Transmembrane protein 97, Putative
T4034267	TraesCS3A02G099800	chr3A	75710166	75713185	Serine carboxypeptidase, putative
T4034281	TraesCS3A02G076100	chr3A	77551319	77552278	Tripartite motif-containing protein 5
T4034285	TraesCSU02G254600	chr3A	77784767	77784967	Protein kinase superfamily protein
T4034286	TraesCS7D02G124000	chr3A	77787186	77787557	histone deacetylase 2
T4034293	TraesCS4B02G124900	chr3A	77809064	77809336	30S ribosomal protein S15
T4034294	TraesCS7D02G256000	chr3A	77812825	77813073	Ras-related small GTP-binding family protein
T4034295	TraesCS7D02G124000	chr3A	77814748	77815119	histone deacetylase 2
T4034296	TraesCSU02G270400	chr3A	77819240	77819494	Methionine--tRNA ligase
T4034298	TraesCS7A02G388100	chr3A	77824416	77824586	NAD(P)H-quinone oxidoreductase subunit 2, chloroplastic
T4034300	TraesCS3B02G125800	chr3A	77826732	77827301	Protein Ycf2
T4034326	TraesCS3A02G103500	chr3A	79092240	79093371	transcription factor-like protein
T4034343	TraesCS3A02G105400	chr3A	81660607	81664663	Regulatory protein NPR1
T4034363	TraesCS3A02G107100	chr3A	83853449	83855611	Bidirectional sugar transporter SWEET
T4034366	TraesCS3A02G107300	chr3A	84335377	84336006	GRF zinc finger family protein
T4034376	TraesCS3A02G108500	chr3A	86971408	86975022	Phosphotransferase
T4034401	TraesCS3A02G111200	chr3A	91890933	91891893	WRKY transcription factor
T4034435	TraesCS3A02G114700	chr3A	95773563	95775350	Cytochrome P450 family protein
T4034562	TraesCS3A02G127000	chr3A	118132476	118133711	Octicosapeptide/Phox/Bem1p domain-containing family protein
T4034597	TraesCS3A02G130700	chr3A	123253255	123254117	DUF674 family protein
T4034604	TraesCS3A02G131500	chr3A	124048962	124051261	Ring finger protein, putative
T4034611	TraesCS3A02G132100	chr3A	124831658	124836316	Phospho-N-acetylmuramoyl-pentapeptide-transferase-like protein
T4034650	TraesCS3A02G137500	chr3A	130649280	130649879	AGAMOUS-like MADS-box protein
T4034658	TraesCS3B02G481700	chr3A	131860983	131862596	F-box family protein-like protein
T4034663	TraesCS3A02G138500	chr3A	132308280	132310128	Carboxypeptidase
T4034673	TraesCS3A02G139500	chr3A	134561883	134563682	1-aminocyclopropane-1-carboxylate oxidase 1
T4034714	TraesCS3A02G143700	chr3A	142395999	142397041	1-deoxy-D-xylulose-5-phosphate synthase
T4034719	TraesCS3A02G144200	chr3A	143029405	143029764	Non-specific lipid-transfer protein
T4034838	TraesCS3A02G156600	chr3A	170582249	170582533	DNAse I-like superfamily protein
T4034850	TraesCS3A02G157600	chr3A	173907950	173909167	NAC domain protein
T4034867	TraesCS7D02G193800	chr3A	177836119	177836957	Keratin, type II cytoskeletal 3
T4034868	TraesCS7D02G193900	chr3A	177838199	177840526	Pre-mRNA-splicing factor SYF1
T4034869	TraesCSU02G116900	chr3A	177889885	177893482	Linalool synthase, chloroplastic
T4034870	TraesCSU02G117000	chr3A	177897457	177899928	Pentatricopeptide repeat-containing protein, putative
T4034871	TraesCSU02G117100	chr3A	177900482	177904062	Histone deacetylase complex subunit SAP18
T4034907	TraesCS3B02G125800	chr3A	184694700	184695269	Protein Ycf2
T4034917	TraesCS3A02G163500	chr3A	185912282	185912788	Glutaredoxin
T4034926	TraesCS3A02G164300	chr3A	189237824	189238189	MFS18 protein
T4034951	TraesCS3A02G166700	chr3A	191342194	191342580	Stigma-specific Stig1 family protein, putative
T4034958	TraesCS3A02G167800	chr3A	194649280	194650603	Translation initiation factor IF-2
T4034976	TraesCS3A02G169000	chr3A	197705746	197706318	Ammonium transporter MEP3
T4034983	TraesCS4A02G016900	chr3A	201146239	201149811	3-dehydroquinate synthase
T4034984	TraesCS4A02G016800	chr3A	201149916	201153483	Protein kinase
T4034989	TraesCS3A02G171000	chr3A	202887620	202890027	Fatty acyl-CoA reductase
T4035032	TraesCS3A02G175900	chr3A	218806696	218811001	Small nuclear ribonucleoprotein SM D3, putative
T4035103	TraesCS2D02G312800	chr3A	236362749	236368649	Major facilitator superfamily transporter
T4035140	TraesCS3A02G135900	chr3A	246787048	246787335	B3 domain-containing protein family
T4035176	TraesCS2A02G266900	chr3A	263739614	263740330	Glycine-rich protein
T4035230	TraesCS6D02G368600	chr3A	323214584	323216284	F-box family protein
T4035261	TraesCS3A02G199600	chr3A	354697883	354701142	Ubiquitin fusion degradation protein 1-like protein
T4035374	TraesCS3A02G209800	chr3A	403968654	403969794	WRKY transcription factor
T4035415	TraesCS3A02G213900	chr3A	418219462	418223012	DUF538 family protein (Protein of unknown function, DUF538)
T4035464	TraesCS4D02G236200	chr3A	432441965	432442543	ATPase subunit 4
T4035556	TraesCS3A02G228600	chr3A	459812747	459815167	WRKY transcription factor
T4035562	TraesCS3D02G157500	chr3A	461397221	461399522	F-box/RNI-like/FBD-like domains-containing protein
T4035594	TraesCS3A02G232000	chr3A	467408085	467408309	Cold-regulated protein
T4035666	TraesCS3A02G238200	chr3A	479959738	479960619	Arabinogalactan peptide-like protein
T4035725	TraesCS3A02G242600	chr3A	492373852	492374592	transmembrane protein
T4035794	TraesCS3A02G249900	chr3A	504701598	504702194	Chitin synthase 1
T4035851	TraesCS3A02G254700	chr3A	514182164	514186101	Chaperone protein dnaJ, putative
T4035852	TraesCS3A02G254600	chr3A	514260581	514261680	Dehydrin
T4035858	TraesCS3B02G288400	chr3A	514934152	514934650	Methionine S-methyltransferase
T4035859	TraesCS3A02G255200	chr3A	514972360	514973430	Epoxide hydrolase 2
T4035865	TraesCS3B02G288400	chr3A	515213947	515214445	Methionine S-methyltransferase
T4035870	TraesCSU02G225000	chr3A	515864539	515866003	Disease resistance protein RPM1
T4035950	TraesCS3A02G264300	chr3A	526527802	526528603	DUF4228 domain protein
T4035953	TraesCS5A02G279300	chr3A	527331327	527331629	GRF zinc finger family protein
T4036001	TraesCS3A02G270700	chr3A	536510523	536511110	Cytochrome P450
T4036016	TraesCS3A02G272600	chr3A	541059673	541061453	Nitrate transporter 1
T4036017	TraesCS3A02G272700	chr3A	541062149	541063153	Oil body-associated protein 2A
T4036056	TraesCS3A02G276000	chr3A	545235243	545237025	SOSS complex subunit C
T4036060	TraesCS3A02G276300	chr3A	545999592	546000620	6-phosphogluconate dehydrogenase family protein
T4036063	TraesCS7B02G274800	chr3A	546114599	546115225	Anthocyanin 3'-O-beta-glucosyltransferase
T4036210	TraesCS3A02G291200	chr3A	564277844	564278708	60S ribosomal protein L18a
T4036211	TraesCS3A02G291300	chr3A	564279244	564282357	Glucosidase 2 subunit beta
T4036245	TraesCS3A02G295100	chr3A	571729416	571730423	LOB domain-containing protein, putative
T4036246	TraesCS3A02G295200	chr3A	571731071	571733435	Histone-lysine N-methyltransferase
T4036257	TraesCS6B02G355000	chr3A	573526453	573527292	Embryogenesis-associated protein EMB8
T4036260	TraesCS3A02G296400	chr3A	574255767	574256587	Copper transporter, putative
T4036261	TraesCS3A02G296500	chr3A	574256874	574259618	ATP-binding ABC transporter
T4036285	TraesCSU02G040600	chr3A	576873360	576877114	Lysosomal Pro-X carboxypeptidase
T4036290	TraesCS3A02G299600	chr3A	577285617	577286831	Fibronectin type III domain-containing protein
T4036320	TraesCS3A02G302500	chr3A	579905848	579907644	lipase, putative (DUF620)
T4036328	TraesCS2A02G195500	chr3A	581532815	581534450	Methylenetetrahydrofolate--tRNA-(uracil-5-)-methyltransferase TrmFO
T4036329	TraesCS3D02G298100	chr3A	581699502	581699675	50S ribosomal protein L33
T4036330	TraesCS3D02G298000	chr3A	581701515	581704812	Disease resistance protein (TIR-NBS class)
T4036337	TraesCS3A02G304300	chr3A	584105990	584110648	Ribosomal protein S24/S35, mitochondrial
T4036348	TraesCS3A02G305300	chr3A	585203602	585207371	Homeobox leucine zipper protein
T4036349	TraesCS3A02G305400	chr3A	585217368	585221434	Aspartate aminotransferase
T4036376	TraesCS3A02G307400	chr3A	590367391	590367788	Signal recognition particle 14 kDa protein
T4036406	TraesCS3A02G310300	chr3A	594222106	594222739	LL-diaminopimelate aminotransferase
T4036435	TraesCS3A02G312600	chr3A	597915448	597916203	AGAMOUS-like MADS-box protein
T4036441	TraesCS2A02G133000	chr3A	599746922	599748400	Werner Syndrome-like exonuclease
T4036455	TraesCS3A02G315300	chr3A	601508720	601510511	2-oxoglutarate and Fe(II)-dependent oxygenase superfamily protein, putative
T4036456	TraesCS3A02G315400	chr3A	601513124	601513459	Calcium-binding family protein
T4036457	TraesCS3A02G315500	chr3A	601513562	601516633	Protein CyaY
T4036461	TraesCS3A02G316000	chr3A	601756451	601756982	LysM domain containing protein
T4036462	TraesCS3A02G316000	chr3A	601771229	601771760	LysM domain containing protein
T4036489	TraesCS3A02G318500	chr3A	604825828	604826670	Methylthioribulose-1-phosphate dehydratase
T4036499	TraesCS7A02G513300	chr3A	607344088	607344672	Ethylene-responsive transcription factor
T4036501	TraesCS7A02G513900	chr3A	607435994	607436251	Nodulin-like / Major Facilitator Superfamily protein
T4036503	TraesCS7A02G514100	chr3A	607490663	607491103	NHL domain-containing protein, putative
T4036514	TraesCS1D02G152400	chr3A	609126294	609133265	Pentatricopeptide repeat-containing protein
T4036547	TraesCS3A02G324000	chr3A	615253887	615256055	Basic helix-loop-helix (BHLH) DNA-binding superfamily protein
T4036549	TraesCS3A02G324000	chr3A	615406427	615408595	Basic helix-loop-helix (BHLH) DNA-binding superfamily protein
T4036580	TraesCS3A02G327500	chr3A	619327624	619327893	Cleavage and polyadenylation specificity factor (CPSF) A subunit protein
T4036581	TraesCS3A02G327600	chr3A	619365678	619366970	Aspartic proteinase nepenthesin-1
T4036599	TraesCS2B02G436200	chr3A	620946916	620948246	Ethylene-responsive transcription factor
T4036612	TraesCS3A02G330000	chr3A	621671623	621671868	F-box family protein
T4036631	TraesCS3A02G332000	chr3A	623646439	623647857	Cytochrome P450 family protein
T4036637	TraesCS3A02G332700	chr3A	624258487	624259966	UDP-glycosyltransferase
T4036643	TraesCS3A02G333500	chr3A	626414568	626417749	F-box family protein-like
T4036644	TraesCS3A02G333500	chr3A	626428252	626431433	F-box family protein-like
T4036674	TraesCS3A02G336200	chr3A	630777999	630782510	Exostosin family protein-like
T4036675	TraesCS3A02G336300	chr3A	630782611	630784527	NAC domain protein
T4036677	TraesCS1B02G305400	chr3A	631764148	631766001	F-box family protein
T4036702	TraesCS3A02G339000	chr3A	634157766	634160226	RING/U-box superfamily protein
T4036751	TraesCSU02G270400	chr3A	641934192	641934446	Methionine--tRNA ligase
T4036756	TraesCS2B02G487300	chr3A	642047340	642047651	30S ribosomal protein S14
T4036757	TraesCSU02G267100	chr3A	642048163	642048339	Argininosuccinate synthase
T4036758	TraesCSU02G270400	chr3A	642048399	642048653	Methionine--tRNA ligase
T4036760	TraesCS3A02G343900	chr3A	642076254	642077692	WRKY transcription factor
T4036761	TraesCS3A02G344000	chr3A	642078325	642083828	Non-green plastid inner envelope membrane protein
T4036762	TraesCS3A02G344100	chr3A	642087446	642093584	Methionine-tRNA ligase, putative
T4036776	TraesCS3B02G125800	chr3A	643687489	643688058	Protein Ycf2
T4036791	TraesCS3A02G347600	chr3A	645510416	645515144	Glutamyl-tRNA(Gln) amidotransferase subunit A
T4036797	TraesCS3A02G347700	chr3A	645605124	645605982	6,7-dimethyl-8-ribityllumazine synthase
T4036799	TraesCS3A02G347900	chr3A	645622778	645627500	sorting nexin
T4036808	TraesCS3A02G349000	chr3A	646580977	646582975	Thioredoxin superfamily protein
T4036809	TraesCS3A02G349100	chr3A	646583915	646585912	Ankyrin repeat-containing protein
T4036844	TraesCS3A02G352900	chr3A	649647810	649650915	Nuclear transcription factor Y subunit B
T4036845	TraesCS3A02G353000	chr3A	649652597	649654144	30S ribosomal protein S12
T4036871	TraesCS3A02G355600	chr3A	651943057	651943320	ARF GAP-like zinc finger-containing protein ZIGA4
T4036910	TraesCS3A02G359800	chr3A	656079985	656081484	Glycosyltransferase
T4036969	TraesCS3A02G365600	chr3A	663837839	663838743	Soul heme-binding family protein
T4036970	TraesCS3A02G365600	chr3A	663850566	663851470	Soul heme-binding family protein
T4037078	TraesCS4B02G202400	chr3A	676854052	676858096	Ankyrin repeat family protein, putative, expressed
T4037104	TraesCS2D02G587700	chr3A	679191482	679192530	60S ribosomal protein L28
T4037105	TraesCS2D02G219400	chr3A	679260318	679262636	Syntaxin
T4037165	TraesCS3A02G385300	chr3A	685303958	685307040	Phosphatidylinositol transfer protein
T4037166	TraesCS3A02G385400	chr3A	685311014	685313789	5'-3' exonuclease
T4037224	TraesCS3A02G390700	chr3A	689537099	689539262	Pentatricopeptide repeat-containing protein
T4037250	TraesCS3A02G393100	chr3A	691729715	691730743	Heat shock transcription factor
T4037252	TraesCS3A02G393200	chr3A	691860965	691862059	Heat shock transcription factor
T4037253	TraesCS3A02G393200	chr3A	691928907	691930001	Heat shock transcription factor
T4037271	TraesCS3A02G394900	chr3A	693368104	693368424	Riboflavin biosynthesis protein RibBA
T4037276	TraesCS3D02G357400	chr3A	694019052	694024446	BEL1-like homeodomain protein 1
T4037415	TraesCS7A02G423000	chr3A	705746863	705747147	DEAD/DEAH box RNA helicase family protein
T4037426	TraesCS3A02G410300	chr3A	706393051	706395582	FBD-associated F-box protein
T4037467	TraesCS3A02G414500	chr3A	710191022	710193703	Cysteine-rich receptor kinase
T4037473	TraesCSU02G224300	chr3A	710368304	710368894	Leucine-rich repeat receptor-like protein kinase family protein
T4037476	TraesCSU02G224300	chr3A	710383699	710384289	Leucine-rich repeat receptor-like protein kinase family protein
T4037482	TraesCSU02G224300	chr3A	710517498	710518088	Leucine-rich repeat receptor-like protein kinase family protein
T4037484	TraesCSU02G259000	chr3A	710541766	710542371	Leucine-rich repeat receptor-like protein kinase family protein
T4037525	TraesCS6A02G366600	chr3A	713446469	713446723	Unknown protein
T4037526	TraesCS6A02G366700	chr3A	713485359	713486359	Serine-rich protein
T4037533	TraesCS3A02G419500	chr3A	714089861	714090812	transcription regulatory protein SNF2
T4037539	TraesCS3A02G420100	chr3A	714287926	714291336	Endo-1,31,4-beta-D-glucanase
T4037573	TraesCS3A02G423100	chr3A	717346144	717346974	ubiquitin carboxyl-terminal hydrolase
T4037604	TraesCS3A02G425900	chr3A	721428006	721431546	RING/U-box superfamily protein
T4037607	TraesCS3A02G426200	chr3A	722375047	722377582	RING/U-box superfamily protein
T4037710	TraesCS3A02G438800	chr3A	734944927	734946650	Dual specificity mitogen-activated protein kinase kinase 4
T4037749	TraesCS3A02G442400	chr3A	737900959	737902756	Defensin
T4037750	TraesCS3A02G442500	chr3A	737904024	737904549	Defensin-like protein
T4037796	TraesCS3A02G447700	chr3A	741049114	741049695	NBS-LRR disease resistance protein, putative, expressed
T4037798	TraesCS6A02G076100	chr3A	741403092	741403709	Harpin-induced protein 1 containing protein
T4037867	TraesCS3A02G454500	chr3A	746567448	746568616	MADS-box protein-like
T4037928	TraesCS3A02G461400	chr3A	751777718	751781842	Fork head transcription factor 1
T4037958	TraesCS3D02G458900	chr3A	753286791	753287993	F-box family protein
T4038004	TraesCS4A02G289100	chr3A	756551483	756552430	F-box domain containing protein
T4038040	TraesCS7A02G294700	chr3A	758529877	758531804	Rubredoxin family protein
T4038058	TraesCS4A02G388300	chr3A	760222808	760226331	DNA repair protein XRCC1
T4038080	TraesCS3A02G475700	chr3A	762887768	762888157	ATP synthase subunit beta
T4038083	TraesCS3A02G476400	chr3A	763108673	763109278	Cysteine protease
T4038085	TraesCS3A02G476500	chr3A	763317751	763318356	Cysteine protease
T4038090	TraesCSU02G197300	chr3A	764256978	764258132	F-box family protein
T4038091	TraesCSU02G197300	chr3A	764333194	764334348	F-box family protein
T4038118	TraesCS3A02G478500	chr3A	767232430	767233979	Leucine-rich repeat receptor-like kinase
T4038119	TraesCS3A02G478500	chr3A	767251503	767253052	Leucine-rich repeat receptor-like kinase
T4038120	TraesCS3A02G478600	chr3A	767262826	767263704	Leucine-rich repeat receptor-like kinase
T4038121	TraesCS3A02G478700	chr3A	767274504	767276117	Leucine-rich repeat receptor-like kinase
T4038127	TraesCS1A02G324300	chr3A	767646191	767646796	F-box/kelch-repeat protein
T4038191	TraesCS3A02G487600	chr3A	771590511	771590898	Sarcoplasmic/endoplasmic reticulum calcium ATPase 2
T4038210	TraesCS3A02G489400	chr3A	773212263	773214528	Basic helix-loop-helix (BHLH) family transcription factor
T4038244	TraesCS3A02G492700	chr3A	776226727	776227173	Calcium-binding protein
T4038245	TraesCS3A02G492700	chr3A	776237247	776237693	Calcium-binding protein
T4038281	TraesCS3A02G496500	chr3A	779307720	779308070	Helicase protein with RING/U-box domain-containing protein
T4038282	TraesCS3A02G496500	chr3A	779316623	779316973	Helicase protein with RING/U-box domain-containing protein
T4038284	TraesCS3A02G496500	chr3A	779375212	779375562	Helicase protein with RING/U-box domain-containing protein
T4038310	TraesCS3A02G498900	chr3A	781661377	781663537	Serine/threonine-protein kinase
T4038312	TraesCS4B02G210200	chr3A	781695757	781696521	RNA-binding protein
T4038340	TraesCS3A02G501500	chr3A	783077900	783078127	UPF0482 protein YnfB
T4038344	TraesCS3A02G501500	chr3A	783119085	783119312	UPF0482 protein YnfB
T4038383	TraesCS3A02G506000	chr3A	785715037	785716610	Gamma-glutamyl phosphate reductase
T4038392	TraesCS3A02G506500	chr3A	785890926	785891741	Progesterone 5-beta-reductase
T4038410	TraesCS3A02G508300	chr3A	788185778	788188912	CsAtPR5
T4038411	TraesCS3A02G508500	chr3A	788285244	788285984	UDP-glycosyltransferase
T4038434	TraesCSU02G240200	chr3A	789581291	789581876	Abscisic stress ripening
T4038436	TraesCS3A02G511400	chr3A	789656247	789659292	Vesicle-associated membrane protein
T4038438	TraesCS3A02G511400	chr3A	789732808	789735853	Vesicle-associated membrane protein
T4038444	TraesCSU02G240200	chr3A	790678554	790679139	Abscisic stress ripening
T4038451	TraesCS3A02G512100	chr3A	791162585	791163001	F-box domain containing protein
T4038452	TraesCS3A02G512200	chr3A	791163031	791163813	F-box domain containing protein
T4038562	TraesCSU02G256000	chr3A	799211767	799212414	Receptor-like protein kinase
T4038662	TraesCS5A02G016100	chr3A	806965753	806967141	Werner Syndrome-like exonuclease
T4038726	TraesCS7A02G105800	chr3A	813415430	813415669	F-box plant-like protein, putative
T4038730	TraesCS3A02G539400	chr3A	813579816	813580790	Transmembrane protein, putative
T4038743	TraesCS3B02G001200	chr3B	1589175	1590449	Receptor-like protein kinase
T4038761	TraesCS3B02G003400	chr3B	2417617	2419782	basic helix-loop-helix (bHLH) DNA-binding superfamily protein
T4038776	TraesCS3B02G003500	chr3B	2631270	2633555	basic helix-loop-helix (bHLH) DNA-binding superfamily protein
T4038777	TraesCS3B02G004400	chr3B	2656819	2658069	F-box family protein
T4038778	TraesCS3B02G004500	chr3B	2659829	2661858	Isoflavone reductase-like protein
T4038809	TraesCS3B02G006800	chr3B	4046020	4046780	Transmembrane protein, putative
T4038812	TraesCS3B02G006800	chr3B	4186756	4187516	Transmembrane protein, putative
T4038846	TraesCSU02G206600	chr3B	5439286	5439693	Zinc finger protein, putative
T4038847	TraesCSU02G041900	chr3B	5443705	5444118	Zinc finger protein, putative
T4038848	TraesCSU02G042300	chr3B	5458288	5458719	Zinc finger protein, putative
T4038852	TraesCS3B02G008100	chr3B	5704148	5705450	Peptidyl-prolyl cis-trans isomerase
[truncated: 3,802 more rows]

## Sheet: Table S4
Table S4. Gene IDs in T4 and corresponding IDs in IW. IW genes that mapped to the same chromosome in T4 are listed in column 2 and genes that mapped to a different chromosome are listed in column 3
T4 ID	IW ID	Closest IW Paralogue
T4000001	TraesCSU02G266700
T4000002	TraesCS1A02G001300
T4000003	TraesCS1A02G001100
T4000004	TraesCS1A02G001200
T4000005	TraesCS1A02G001000
T4000006	TraesCS1A02G001600
T4000007	TraesCS1A02G001200
T4000008	TraesCS1A02G000100
T4000009	TraesCS1A02G000200
T4000010	TraesCS1A02G000300
T4000011	TraesCS1A02G000400
T4000012	TraesCS1A02G001200
T4000013	TraesCS1A02G000500
T4000014	TraesCS1A02G000600
T4000015	TraesCS1A02G001500
T4000016	TraesCSU02G265800
T4000017	TraesCS1A02G000700
T4000018	TraesCSU02G265400
T4000019	TraesCS1A02G000900
T4000020	TraesCS1A02G001000
T4000021	TraesCS1A02G001400
T4000022	TraesCS1A02G000800
T4000023	TraesCS1A02G001700
T4000024	TraesCS1A02G001800
T4000025	TraesCS1A02G001900
T4000026	TraesCS1A02G002000
T4000027	TraesCS1A02G002100
T4000028	TraesCS1A02G002200
T4000029	TraesCS1A02G002300
T4000030	TraesCS1A02G002400
T4000031	TraesCS1A02G002400
T4000032	TraesCS1A02G002500
T4000033	TraesCS1A02G002700
T4000034		TraesCS1B02G002000
T4000035	TraesCSU02G184000
T4000036	TraesCS1A02G002800
T4000037	TraesCS1A02G002900
T4000038	TraesCS1A02G003000
T4000039	TraesCS1A02G003100
T4000040	TraesCS1A02G003200
T4000041	TraesCS1A02G003300
T4000042	TraesCS1A02G003400
T4000043	TraesCS1A02G003500
T4000044	TraesCS1A02G003546
T4000045	TraesCS1A02G003600
T4000046	TraesCS1A02G003700
T4000047	TraesCS1A02G003800
T4000048	TraesCS1A02G003900
T4000049	TraesCS1A02G004000
T4000050	TraesCS1A02G004100
T4000051		TraesCS1B02G000300
T4000052	TraesCS1A02G004126
T4000053	TraesCS1A02G004200
T4000054	TraesCS1A02G004300
T4000055	TraesCS1A02G004400
T4000056	TraesCS1A02G004500
T4000057	TraesCSU02G000200
T4000058	TraesCSU02G185400
T4000059	TraesCSU02G254400
T4000060	TraesCSU02G000200
T4000061	TraesCSU02G185200
T4000062	TraesCS1A02G004900
T4000063	TraesCS1A02G004600
T4000064	TraesCS1A02G004700
T4000065	TraesCSU02G000200
T4000066	TraesCS1A02G004800
T4000067	TraesCS1A02G004900
T4000068	TraesCS1A02G005000
T4000069	TraesCS1A02G005100
T4000070	TraesCS1A02G005200
T4000071	TraesCS1A02G005300
T4000072	TraesCS1A02G005315
T4000073	TraesCS1A02G005387
T4000074	TraesCS1A02G005368
T4000075	TraesCS1A02G005400
T4000076	TraesCS1A02G005500
T4000077	TraesCS1A02G005600
T4000078	TraesCS1A02G005700
T4000079	TraesCS1A02G005800
T4000080	TraesCS1A02G006400
T4000081	TraesCS1A02G006500
T4000082	TraesCS1A02G005900
T4000083	TraesCS1A02G006000
T4000084	TraesCS1A02G006100
T4000085	TraesCS1A02G006200
T4000086	TraesCS1A02G006300
T4000087	TraesCS1A02G006400
T4000088	TraesCS1A02G006700
T4000089	TraesCS1A02G006800
T4000090	TraesCS1A02G006900
T4000091	TraesCS1A02G007000
T4000092	TraesCS1A02G007100
T4000093	TraesCS1A02G007200
T4000094	TraesCS1A02G007236
T4000095		TraesCS1B02G010900
T4000096	TraesCS1A02G007344
T4000097	TraesCS1A02G007400
T4000098	TraesCS1A02G007405
T4000099	TraesCS1A02G007500
T4000100	TraesCS1A02G007600
T4000101	TraesCS1A02G007700
T4000102	TraesCS1A02G007800
T4000103	TraesCS1A02G007900
T4000104		TraesCS1B02G011600
T4000105	TraesCS1A02G007934
T4000106	TraesCS1A02G008000
T4000107	TraesCSU02G150900
T4000108	TraesCSU02G135500
T4000109	TraesCS1A02G008100
T4000110	TraesCS1A02G008200
T4000111	TraesCS1A02G008300
T4000112	TraesCS1A02G008600
T4000113	TraesCS1A02G008700
T4000114	TraesCS1A02G008800
T4000115	TraesCS1A02G008900
T4000116	TraesCSU02G186700
T4000117	TraesCSU02G161500
T4000118	TraesCSU02G186700
T4000119	TraesCSU02G186700
T4000120	TraesCSU02G186700
T4000121	TraesCSU02G186700
T4000122	TraesCS1A02G009000
T4000123	TraesCS1A02G009100
T4000124	TraesCS1A02G009200
T4000125	TraesCS1A02G008200
T4000126	TraesCS1A02G008200
T4000127	TraesCS1A02G008200
T4000128	TraesCS1A02G009300
T4000129	TraesCS1A02G009320
T4000130	TraesCS1A02G009600
T4000131	TraesCS1A02G009700
T4000132	TraesCS1A02G010000
T4000133	TraesCS1A02G010100
T4000134	TraesCS1A02G010200
T4000135	TraesCS1A02G010300
T4000136	TraesCS1A02G010400
T4000137	TraesCS1A02G010500
T4000138	TraesCS1A02G010600
T4000139	TraesCS1A02G010700
T4000140	TraesCS1A02G010800
T4000141	TraesCS1A02G010900
T4000142	TraesCS1A02G010905
T4000143	TraesCS1A02G011100
T4000144	TraesCS1A02G011200
T4000145	TraesCS1A02G011300
T4000146	TraesCS1A02G011400
T4000147	TraesCS1A02G011500
T4000148	TraesCS1A02G011600
T4000149	TraesCS1A02G011700
T4000150	TraesCS1A02G011800
T4000151	TraesCS1A02G011900
T4000152	TraesCS1A02G012000
T4000153	TraesCS1A02G012100
T4000154		TraesCS1B02G039200
T4000155		TraesCS1B02G039300
T4000156		TraesCS1B02G039400
T4000157		TraesCS1B02G039500
T4000158		TraesCS1B02G039600
T4000159		TraesCS1B02G039620
T4000160		TraesCS1B02G039625
T4000161		TraesCS1B02G039700
T4000162		TraesCS5B02G163000
T4000163		TraesCS5B02G162900
T4000164	TraesCS1A02G012200
T4000165	TraesCS1A02G012300
T4000166	TraesCS1A02G012400
T4000167	TraesCS1A02G012500
T4000168	TraesCS1A02G012600
T4000169	TraesCS1A02G012700
T4000170	TraesCS1A02G012800
T4000171	TraesCS1A02G012900
T4000172	TraesCS1A02G013000
T4000173	TraesCS1A02G013100
T4000174	TraesCS1A02G013200
T4000175	TraesCS1A02G013300
T4000176	TraesCS1A02G013400
T4000177	TraesCS1A02G013500
T4000178	TraesCS1A02G013900
T4000179	TraesCS1A02G014000
T4000180	TraesCS1A02G014100
T4000181	TraesCS1A02G014100
T4000182	TraesCS1A02G014200
T4000183	TraesCS1A02G014300
T4000184	TraesCS1A02G014400
T4000185	TraesCS1A02G014500
T4000186	TraesCS1A02G014700
T4000187	TraesCS1A02G014800
T4000188	TraesCS1A02G014900
T4000189	TraesCS1A02G015000
T4000190	TraesCS1A02G015100
T4000191	TraesCS1A02G015200
T4000192	TraesCS1A02G015300
T4000193	TraesCS1A02G015378
T4000194	TraesCS1A02G015400
T4000195	TraesCS1A02G015500
T4000196	TraesCS1A02G015600
T4000197	TraesCS1A02G015700
T4000198	TraesCS1A02G015800
T4000199	TraesCS1A02G015900
T4000200	TraesCS1A02G016000
T4000201	TraesCS1A02G016100
T4000202	TraesCS1A02G016203
T4000203	TraesCS1A02G016200
T4000204	TraesCS1A02G016300
T4000205	TraesCS1A02G016400
T4000206	TraesCS1A02G016500
T4000207	TraesCS1A02G016600
T4000208	TraesCS1A02G016800
T4000209	TraesCS1A02G016900
T4000210	TraesCS1A02G017000
T4000211	TraesCS1A02G017100
T4000212	TraesCS1A02G017200
T4000213	TraesCS1A02G017300
T4000214	TraesCS1A02G017400
T4000215	TraesCSU02G184900
T4000216	TraesCSU02G183000
T4000217	TraesCS1A02G017500
T4000218	TraesCS1A02G017600
T4000219	TraesCS1A02G017700
T4000220	TraesCS1A02G017800
T4000221	TraesCS1A02G017900
T4000222	TraesCS1A02G018000
T4000223	TraesCS1A02G018100
T4000224	TraesCS1A02G018200
T4000225	TraesCS1A02G018300
T4000226	TraesCS1A02G018400
T4000227	TraesCS1A02G018500
T4000228	TraesCS1A02G018600
T4000229	TraesCS1A02G018700
T4000230	TraesCS1A02G018800
T4000231	TraesCS1A02G018900
T4000232	TraesCS1A02G019000
T4000233	TraesCS1A02G019100
T4000234	TraesCS1A02G019200
T4000235	TraesCS1A02G019300
T4000236	TraesCS1A02G019400
T4000237	TraesCS1A02G019500
T4000238	TraesCS1A02G019600
T4000239	TraesCS1A02G019700
T4000240		TraesCS3A02G149700
T4000241	TraesCS1A02G019800
T4000242	TraesCS1A02G019900
T4000243	TraesCS1A02G020000
T4000244	TraesCS1A02G020100
T4000245	TraesCS1A02G020153
T4000246	TraesCS1A02G020200
T4000247		TraesCS1D02G019700
T4000248	TraesCS1A02G020300
T4000249	TraesCS1A02G020400
T4000250	TraesCS1A02G020500
T4000251	TraesCS1A02G020600
T4000252	TraesCS1A02G020700
T4000253	TraesCS1A02G020800
T4000254	TraesCS1A02G021100
T4000255	TraesCS1A02G021200
T4000256	TraesCS1A02G021300
T4000257	TraesCS1A02G021400
T4000258	TraesCS1A02G020900
T4000259	TraesCS1A02G021500
T4000260	TraesCS1A02G021600
T4000261	TraesCS1A02G021700
T4000262	TraesCS1A02G021800
T4000263	TraesCS1A02G021900
T4000264	TraesCS1A02G022000
T4000265	TraesCS1A02G022100
T4000266	TraesCS1A02G022200
T4000267	TraesCS1A02G022300
T4000268	TraesCS1A02G022100
T4000269	TraesCS1A02G022100
T4000270	TraesCS1A02G022500
T4000271	TraesCS1A02G022600
T4000272	TraesCS1A02G022600
T4000273		TraesCS3A02G110900
T4000274	TraesCS1A02G022700
T4000275	TraesCS1A02G022800
T4000276	TraesCS1A02G022900
T4000277	TraesCS1A02G023000
T4000278	TraesCS1A02G023100
T4000279	TraesCS1A02G023205
T4000280	TraesCS1A02G023200
T4000281	TraesCS1A02G023300
T4000282	TraesCS1A02G023400
T4000283	TraesCS1A02G023500
T4000284	TraesCS1A02G023600
T4000285	TraesCS1A02G023700
T4000286	TraesCS1A02G023800
T4000287	TraesCS1A02G023900
T4000288	TraesCS1A02G024000
T4000289	TraesCS1A02G024100
T4000290	TraesCS1A02G024200
T4000291	TraesCS1A02G024300
T4000292	TraesCS1A02G024400
T4000293	TraesCS1A02G024500
T4000294	TraesCS1A02G024600
T4000295	TraesCS1A02G024700
T4000296	TraesCS1A02G025300
T4000297	TraesCS1A02G024900
T4000298	TraesCS1A02G025000
T4000299	TraesCS1A02G025100
T4000300	TraesCS1A02G025200
T4000301	TraesCS1A02G024800
T4000302	TraesCS1A02G025400
T4000303	TraesCS1A02G025500
T4000304	TraesCS1A02G025600
T4000305	TraesCS1A02G025700
T4000306	TraesCS1A02G025800
T4000307	TraesCS1A02G025900
T4000308	TraesCS1A02G026000
T4000309	TraesCS1A02G026100
T4000310	TraesCS1A02G026200
T4000311	TraesCS1A02G026300
T4000312	TraesCS1A02G026400
T4000313	TraesCS1A02G026600
T4000314	TraesCS1A02G026700
T4000315	TraesCS1A02G026800
T4000316	TraesCS1A02G026900
T4000317	TraesCS1A02G027000
T4000318	TraesCS1A02G027100
T4000319	TraesCS1A02G027200
T4000320	TraesCS1A02G027300
T4000321	TraesCS1A02G027400
T4000322	TraesCS1A02G027500
T4000323	TraesCS1A02G028100
T4000324	TraesCS1A02G028200
T4000325		TraesCS1B02G035000
T4000326		TraesCS7B02G147000
T4000327	TraesCSU02G174500
T4000328	TraesCSU02G000300
T4000329		TraesCS2B02G084400
T4000330	TraesCSU02G174500
T4000331	TraesCSU02G000300
T4000332	TraesCSU02G000300
T4000333	TraesCS1A02G028600
T4000334	TraesCS1A02G027700
T4000335	TraesCS1A02G027800
T4000336	TraesCS1A02G027900
T4000337	TraesCS1A02G028000
T4000338	TraesCSU02G174500
T4000339	TraesCSU02G000300
T4000340	TraesCS1A02G028300
T4000341	TraesCS1A02G028400
T4000342	TraesCS1A02G028500
T4000343	TraesCSU02G213800
T4000344	TraesCS1A02G028700
T4000345	TraesCS1A02G028900
T4000346	TraesCS1A02G029000
T4000347	TraesCS1A02G029100
T4000348	TraesCS1A02G029200
T4000349	TraesCS1A02G029300
T4000350	TraesCS1A02G029400
T4000351	TraesCS1A02G029500
T4000352	TraesCS1A02G029600
T4000353	TraesCS1A02G029700
T4000354	TraesCS1A02G029800
T4000355		TraesCS6D02G161700
T4000356	TraesCS1A02G029900
T4000357	TraesCS1A02G030000
T4000358	TraesCS1A02G030100
T4000359	TraesCS1A02G030200
T4000360	TraesCS1A02G030300
T4000361	TraesCS1A02G030400
T4000362	TraesCS1A02G030500
T4000363	TraesCS1A02G030600
T4000364	TraesCS1A02G030900
T4000365	TraesCS1A02G031000
T4000366	TraesCS1A02G031100
T4000367	TraesCS1A02G031200
T4000368	TraesCS1A02G031300
T4000369	TraesCS1A02G031400
T4000370	TraesCS1A02G031500
T4000371	TraesCS1A02G031600
T4000372	TraesCS1A02G031700
T4000373	TraesCS1A02G031800
T4000374	TraesCS1A02G031900
T4000375	TraesCS1A02G032000
T4000376	TraesCS1A02G032100
T4000377	TraesCS1A02G032200
T4000378	TraesCS1A02G032300
T4000379	TraesCS1A02G032400
T4000380	TraesCS1A02G032500
T4000381	TraesCS1A02G032600
T4000382	TraesCS1A02G032700
T4000383	TraesCSU02G155100
T4000384	TraesCS1A02G032800
T4000385	TraesCS1A02G032900
T4000386	TraesCS1A02G033000
T4000387	TraesCS1A02G033100
T4000388	TraesCS1A02G033200
T4000389	TraesCS1A02G033288
T4000390	TraesCS1A02G033300
T4000391	TraesCS1A02G033400
T4000392	TraesCS1A02G033501
T4000393	TraesCS1A02G033500
T4000394	TraesCS1A02G033600
T4000395	TraesCS1A02G033700
T4000396	TraesCS1A02G033800
T4000397	TraesCS1A02G033900
T4000398	TraesCS1A02G034000
T4000399	TraesCS1A02G034100
T4000400	TraesCS1A02G034200
T4000401	TraesCS1A02G034300
T4000402		TraesCS7D02G531300
T4000403	TraesCS1A02G034400
T4000404	TraesCS1A02G034500
T4000405	TraesCS1A02G034600
T4000406	TraesCS1A02G034700
T4000407		TraesCS3A02G497800
T4000408	TraesCS1A02G034900
T4000409	TraesCSU02G230900
T4000410	TraesCS1A02G035000
T4000411	TraesCS1A02G035100
T4000412	TraesCS1A02G035200
T4000413	TraesCS1A02G035300
T4000414	TraesCS1A02G035400
T4000415	TraesCS1A02G035400
T4000416	TraesCS1A02G035500
T4000417	TraesCS1A02G035600
T4000418	TraesCSU02G150000
T4000419	TraesCSU02G150000
T4000420		TraesCS1B02G045700
T4000421	TraesCS1A02G035900
T4000422	TraesCS1A02G035700
T4000423	TraesCS1A02G035800
T4000424	TraesCS1A02G036000
T4000425	TraesCS1A02G036100
T4000426	TraesCS1A02G036200
T4000427	TraesCS1A02G036300
T4000428	TraesCS1A02G036400
T4000429	TraesCS1A02G036500
T4000430	TraesCS1A02G036600
T4000431	TraesCS1A02G036700
T4000432	TraesCS1A02G036800
T4000433	TraesCS1A02G036900
T4000434	TraesCS1A02G037000
T4000435	TraesCS1A02G037100
T4000436	TraesCS1A02G037200
T4000437	TraesCS1A02G037300
T4000438	TraesCS1A02G037400
T4000439	TraesCS1A02G037500
T4000440	TraesCS1A02G037600
T4000441	TraesCS1A02G037700
T4000442	TraesCS1A02G037800
T4000443	TraesCS1A02G037900
T4000444	TraesCS1A02G038000
T4000445	TraesCS1A02G038100
T4000446		TraesCS6D02G263100
T4000447	TraesCS1A02G038200
T4000448	TraesCS1A02G038300
T4000449	TraesCS1A02G038400
T4000450	TraesCS1A02G038500
T4000451	TraesCS1A02G038600
T4000452	TraesCS1A02G038800
T4000453	TraesCS1A02G038828
T4000454	TraesCS1A02G038828
T4000455	TraesCS1A02G039000
T4000456	TraesCS1A02G039100
T4000457		TraesCS7A02G406900
T4000458	TraesCS1A02G039200
T4000459		TraesCS7D02G110900
T4000460	TraesCS1A02G039300
T4000461	TraesCS1A02G039400
T4000462	TraesCS1A02G039600
T4000463	TraesCS1A02G039700
T4000464	TraesCS1A02G039800
T4000465	TraesCS1A02G039900
T4000466	TraesCS1A02G040000
T4000467	TraesCS1A02G040100
T4000468	TraesCS1A02G040200
T4000469	TraesCS1A02G040300
T4000470	TraesCS1A02G040400
T4000471	TraesCS1A02G040500
T4000472	TraesCS1A02G040600
T4000473	TraesCS1A02G040700
T4000474	TraesCS1A02G040800
T4000475	TraesCS1A02G040900
T4000476	TraesCS1A02G157000
T4000477	TraesCS1A02G041100
T4000478	TraesCS1A02G041200
T4000479	TraesCS1A02G041300
T4000480	TraesCS1A02G041400
T4000481	TraesCS1A02G041500
T4000482	TraesCS1A02G041600
T4000483	TraesCS1A02G041700
T4000484	TraesCS1A02G041800
T4000485	TraesCS1A02G041900
T4000486	TraesCS1A02G042000
T4000487	TraesCS1A02G042100
T4000488	TraesCS1A02G042200
T4000489	TraesCS1A02G042300
T4000490	TraesCS1A02G042400
T4000491	TraesCS1A02G042500
T4000492	TraesCSU02G000500
T4000493	TraesCSU02G000400
T4000494	TraesCS1A02G042700
T4000495	TraesCS1A02G370500
T4000496	TraesCS1A02G042800
T4000497	TraesCS1A02G042900
T4000498	TraesCS1A02G043000
T4000499	TraesCS1A02G043100
T4000500	TraesCS1A02G043200
T4000501	TraesCS1A02G043300
T4000502	TraesCS1A02G043400
T4000503		TraesCS3B02G173800
T4000504	TraesCS1A02G043500
T4000505	TraesCS1A02G043600
T4000506	TraesCS1A02G043700
T4000507	TraesCS1A02G043800
T4000508	TraesCS1A02G043900
T4000509	TraesCS1A02G043200
T4000510	TraesCS1A02G044000
T4000511	TraesCS1A02G044100
T4000512	TraesCS1A02G044200
T4000513	TraesCS1A02G044300
T4000514	TraesCS1A02G044400
T4000515	TraesCS1A02G044500
T4000516	TraesCS1A02G044600
T4000517	TraesCS1A02G044700
T4000518	TraesCS1A02G044700
T4000519	TraesCS1A02G044700
T4000520	TraesCS1A02G044800
T4000521	TraesCS1A02G044900
T4000522	TraesCS1A02G045000
T4000523	TraesCS1A02G045100
T4000524	TraesCS1A02G045300
T4000525	TraesCS1A02G045400
T4000526	TraesCS7B02G390500
T4000527	TraesCS1A02G045600
T4000528	TraesCS1A02G045500
T4000529	TraesCS1A02G045600
T4000530	TraesCS1A02G045700
T4000531	TraesCS1A02G045800
T4000532	TraesCS1A02G045900
T4000533	TraesCS1A02G046000
T4000534	TraesCS1A02G046100
T4000535	TraesCS1A02G046300
T4000536	TraesCS1A02G046400
T4000537		TraesCS1D02G047300
T4000538		TraesCS1D02G047200
T4000539	TraesCS1A02G046500
T4000540	TraesCS1A02G046600
T4000541	TraesCS1A02G046700
T4000542	TraesCS1A02G046800
T4000543	TraesCS1A02G046900
T4000544	TraesCS1A02G047000
T4000545	TraesCS1A02G047100
T4000546	TraesCS1A02G096200
T4000547	TraesCS1A02G047200
T4000548	TraesCS1A02G047300
T4000549	TraesCS1A02G047400
T4000550	TraesCS1A02G047500
T4000551	TraesCS1A02G047700
T4000552	TraesCS1A02G048000
T4000553	TraesCS1A02G048100
T4000554	TraesCS1A02G048200
T4000555	TraesCS1A02G048300
T4000556	TraesCS1A02G048400
T4000557	TraesCS1A02G048500
T4000558	TraesCS1A02G048300
T4000559	TraesCS1A02G048600
T4000560	TraesCS1A02G048700
T4000561	TraesCS1A02G048800
T4000562	TraesCS1A02G048900
T4000563	TraesCS1A02G049000
T4000564	TraesCS1A02G049100
T4000565	TraesCSU02G151600
T4000566	TraesCS1A02G049200
T4000567	TraesCS1A02G049300
T4000568	TraesCS1A02G049500
T4000569	TraesCS1A02G049600
T4000570	TraesCS1A02G049700
T4000571	TraesCS1A02G049800
T4000572	TraesCS1A02G049900
T4000573	TraesCS1A02G050000
T4000574	TraesCS1A02G050100
T4000575	TraesCS1A02G050200
T4000576	TraesCS1A02G050300
T4000577	TraesCS1A02G050400
T4000578	TraesCS1A02G050500
T4000579	TraesCS1A02G050600
T4000580	TraesCS1A02G050700
T4000581	TraesCS1A02G050800
T4000582	TraesCS1A02G050900
T4000583	TraesCS1A02G051000
T4000584	TraesCS1A02G051100
T4000585	TraesCS1A02G051200
T4000586	TraesCS1A02G051300
T4000587	TraesCS1A02G051400
T4000588	TraesCS1A02G052000
T4000589	TraesCS1A02G052100
T4000590	TraesCS1A02G052200
T4000591	TraesCS1A02G052300
T4000592	TraesCS1A02G052400
T4000593	TraesCS1A02G052500
T4000594	TraesCS1A02G052600
T4000595	TraesCS1A02G052700
T4000596	TraesCS1A02G052800
T4000597	TraesCS1A02G052900
T4000598	TraesCS1A02G053000
T4000599	TraesCSU02G000600
T4000600	TraesCS1A02G053100
T4000601	TraesCS1A02G052500
T4000602	TraesCS1A02G053200
T4000603	TraesCS1A02G053200
T4000604	TraesCS1A02G053300
T4000605	TraesCS1A02G053400
T4000606	TraesCS1A02G053500
T4000607	TraesCS1A02G053600
T4000608	TraesCS1A02G053700
T4000609	TraesCS1A02G053800
T4000610	TraesCS1A02G054000
T4000611	TraesCS1A02G054200
T4000612	TraesCS1A02G054300
T4000613	TraesCS1A02G054400
T4000614	TraesCS1A02G054500
T4000615	TraesCS1A02G054600
T4000616	TraesCS1A02G054700
T4000617	TraesCS1A02G054800
T4000618	TraesCS1A02G054900
T4000619	TraesCS1A02G055000
T4000620	TraesCS1A02G055100
T4000621	TraesCS1A02G055200
T4000622	TraesCS1A02G055300
T4000623	TraesCS1A02G055400
T4000624	TraesCS1A02G055500
T4000625	TraesCS1A02G055600
T4000626	TraesCS1A02G055700
T4000627	TraesCS1A02G055800
T4000628	TraesCS1A02G055900
T4000629	TraesCS1A02G056000
T4000630	TraesCS1A02G056105
T4000631	TraesCS1A02G056100
T4000632	TraesCS1A02G056200
T4000633	TraesCS1A02G056400
T4000634	TraesCS1A02G056500
T4000635	TraesCS1A02G056600
T4000636	TraesCS1A02G056700
T4000637	TraesCS1A02G056800
T4000638	TraesCS1A02G056900
T4000639	TraesCS1A02G057000
T4000640	TraesCS1A02G057100
T4000641	TraesCS1A02G057200
T4000642	TraesCS1A02G057300
T4000643	TraesCS1A02G057400
T4000644	TraesCS1A02G057500
T4000645	TraesCS1A02G057600
T4000646	TraesCSU02G015200
T4000647	TraesCS1A02G057700
T4000648	TraesCS1A02G057800
T4000649	TraesCS1A02G057900
T4000650	TraesCS1A02G058000
T4000651	TraesCS1A02G058100
T4000652	TraesCS1A02G058200
T4000653	TraesCS1A02G058300
T4000654	TraesCS1A02G058400
T4000655		TraesCS1B02G075900
T4000656	TraesCS1A02G058500
T4000657	TraesCS1A02G058600
T4000658	TraesCS1A02G058700
T4000659	TraesCS1A02G058800
T4000660	TraesCS1A02G058900
T4000661	TraesCS1A02G059000
T4000662	TraesCS1A02G059100
T4000663	TraesCS1A02G059200
T4000664	TraesCS1A02G059300
T4000665	TraesCS1A02G059400
T4000666	TraesCS1A02G059500
T4000667	TraesCS1A02G059600
T4000668	TraesCS1A02G059700
T4000669	TraesCS1A02G059800
T4000670		TraesCS6A02G235500
T4000671		TraesCS6A02G235400
T4000672		TraesCS6A02G235300
T4000673	TraesCS1A02G059900
T4000674	TraesCS1A02G060000
T4000675	TraesCS1A02G060000
T4000676	TraesCS1A02G060000
T4000677	TraesCS1A02G060100
T4000678	TraesCS1A02G060200
T4000679	TraesCS1A02G060300
T4000680	TraesCS1A02G060400
T4000681	TraesCS1A02G060500
T4000682	TraesCS1A02G060600
T4000683	TraesCS1A02G060700
T4000684	TraesCS1A02G060800
T4000685	TraesCS1A02G060900
T4000686	TraesCS1A02G061000
T4000687	TraesCS1A02G061100
T4000688	TraesCS1A02G061200
T4000689	TraesCS1A02G061300
T4000690	TraesCS1A02G061400
T4000691	TraesCS1A02G061500
T4000692	TraesCS1A02G061600
T4000693	TraesCS1A02G061700
T4000694	TraesCS1A02G061800
T4000695	TraesCS1A02G061900
T4000696	TraesCS1A02G062000
T4000697	TraesCS1A02G062100
T4000698	TraesCS1A02G062200
T4000699	TraesCS1A02G062500
T4000700	TraesCS1A02G062600
T4000701	TraesCS1A02G062700
T4000702	TraesCS1A02G062800
T4000703	TraesCS1A02G062900
T4000704	TraesCS1A02G063000
T4000705	TraesCS1A02G098600
T4000706	TraesCS1A02G063100
T4000707	TraesCS1A02G063200
T4000708		TraesCS1B02G080800
T4000709	TraesCS1A02G063300
T4000710	TraesCS1A02G063400
T4000711	TraesCS1A02G063300
T4000712	TraesCS1A02G063300
T4000713	TraesCS1A02G063500
T4000714	TraesCS1A02G063600
T4000715	TraesCS1A02G063800
T4000716		TraesCS1B02G081900
T4000717	TraesCS1A02G064000
T4000718	TraesCS1A02G064100
T4000719	TraesCS1A02G064200
T4000720	TraesCS1A02G064300
T4000721	TraesCS1A02G064400
T4000722	TraesCS1A02G064500
T4000723	TraesCS1A02G064600
T4000724	TraesCS1A02G064700
T4000725	TraesCS1A02G315000
T4000726	TraesCS1A02G064800
T4000727	TraesCS1A02G064900
T4000728	TraesCS1A02G065000
T4000729	TraesCS4A02G253900
T4000730	TraesCS1A02G065200
T4000731	TraesCS1A02G065300
T4000732	TraesCS1A02G065400
T4000733	TraesCS1A02G065500
T4000734	TraesCS1A02G065600
T4000735	TraesCS1A02G065700
T4000736	TraesCS1A02G065800
T4000737	TraesCS1A02G065900
T4000738	TraesCS1A02G066000
T4000739	TraesCS1A02G066100
T4000740	TraesCS1A02G066200
T4000741	TraesCS1A02G066300
T4000742	TraesCS1A02G066400
T4000743	TraesCS1A02G066500
T4000744	TraesCS1A02G066521
T4000745	TraesCS1A02G066600
T4000746	TraesCS1A02G066800
T4000747	TraesCS1A02G066900
T4000748	TraesCS1A02G067000
T4000749	TraesCS1A02G067100
T4000750	TraesCS1A02G067200
T4000751	TraesCS1A02G067300
T4000752	TraesCS1A02G067400
T4000753	TraesCS1A02G067462
T4000754	TraesCS1A02G067472
T4000755	TraesCS1A02G067500
T4000756	TraesCS1A02G067600
T4000757	TraesCS1A02G067700
T4000758	TraesCS1A02G067800
T4000759	TraesCS1A02G067900
T4000760	TraesCS1A02G068000
T4000761	TraesCS1A02G068100
T4000762	TraesCS1A02G068200
T4000763	TraesCS1A02G068300
T4000764	TraesCS1A02G068100
T4000765	TraesCS1A02G068200
T4000766	TraesCSU02G080400
T4000767	TraesCS1A02G068400
T4000768	TraesCS1A02G068500
T4000769	TraesCS1A02G068600
T4000770	TraesCS1A02G068700
T4000771		TraesCS6A02G066000
T4000772		TraesCS6A02G065900
T4000773	TraesCS1A02G068800
T4000774	TraesCS1A02G068900
T4000775	TraesCS1A02G069000
T4000776	TraesCS1A02G069100
T4000777	TraesCS1A02G069200
T4000778	TraesCS1A02G069300
T4000779	TraesCS1A02G069400
T4000780	TraesCS1A02G069800
T4000781	TraesCS1A02G069900
T4000782		TraesCS4A02G275400
T4000783	TraesCS1A02G070000
T4000784	TraesCS1A02G070100
T4000785	TraesCS1A02G070200
T4000786	TraesCS1A02G070300
T4000787	TraesCS1A02G070200
T4000788	TraesCS1A02G070400
T4000789	TraesCS1A02G070500
T4000790	TraesCS1A02G070700
T4000791		TraesCS4D02G083900
T4000792	TraesCS1A02G070800
T4000793	TraesCS1A02G070900
T4000794	TraesCS1A02G071000
T4000795	TraesCS1A02G071100
T4000796	TraesCS1A02G071200
T4000797	TraesCS1A02G071300
T4000798	TraesCS1A02G071500
T4000799	TraesCS1A02G071600
T4000800	TraesCS1A02G071657
T4000801	TraesCS1A02G071700
T4000802	TraesCS1A02G072000
T4000803		TraesCS5D02G219300
T4000804	TraesCS1A02G072300
T4000805	TraesCS1A02G072200
T4000806	TraesCS1A02G072100
T4000807	TraesCS1A02G072400
T4000808	TraesCS1A02G072500
T4000809	TraesCS1A02G072600
T4000810	TraesCS1A02G072700
T4000811	TraesCS1A02G072800
T4000812	TraesCS1A02G072900
T4000813	TraesCS1A02G072982
T4000814	TraesCS1A02G072986
T4000815	TraesCS1A02G073000
T4000816	TraesCS1A02G073100
T4000817	TraesCS1A02G073200
T4000818	TraesCS1A02G073300
T4000819	TraesCS1A02G073400
T4000820	TraesCS1A02G073500
T4000821	TraesCS1A02G073600
T4000822	TraesCS1A02G073700
T4000823	TraesCS1A02G073800
T4000824	TraesCS1A02G074100
T4000825	TraesCS1A02G073900
T4000826	TraesCS1A02G074000
T4000827		TraesCS1D02G076800
T4000828	TraesCS1A02G074100
T4000829	TraesCS1A02G074200
T4000830	TraesCS1A02G074300
T4000831	TraesCS1A02G074400
T4000832	TraesCS1A02G074800
T4000833	TraesCS1A02G075200
T4000834	TraesCS1A02G074900
T4000835	TraesCS1A02G075000
T4000836	TraesCS1A02G256600
T4000837	TraesCS1A02G075100
T4000838	TraesCS1A02G075200
T4000839	TraesCS1A02G075400
T4000840	TraesCS1A02G075300
T4000841	TraesCS1A02G075500
T4000842	TraesCS1A02G075600
T4000843	TraesCS1A02G075700
T4000844	TraesCS1A02G075800
T4000845	TraesCS1A02G075900
T4000846	TraesCS1A02G076000
T4000847	TraesCS1A02G076100
T4000848		TraesCS1D02G078500
T4000849	TraesCS1A02G076200
T4000850	TraesCS1A02G076300
T4000851	TraesCS1A02G076400
T4000852	TraesCS1A02G279200
T4000853	TraesCS1A02G076500
T4000854	TraesCS1A02G076700
T4000855	TraesCS1A02G076800
T4000856	TraesCS1A02G076900
T4000857	TraesCS1A02G077000
T4000858	TraesCS1A02G077100
T4000859		TraesCS1B02G095200
T4000860	TraesCS1A02G077200
T4000861	TraesCS1A02G077300
T4000862	TraesCS1A02G077400
T4000863	TraesCS1A02G077400
T4000864	TraesCS1A02G077500
T4000865	TraesCS1A02G077600
T4000866	TraesCS1A02G077700
T4000867		TraesCS1D02G079800
T4000868	TraesCS1A02G077800
T4000869	TraesCS1A02G077900
T4000870	TraesCS1A02G078000
T4000871	TraesCS1A02G078100
T4000872	TraesCS1A02G078200
T4000873	TraesCS1A02G078300
T4000874	TraesCS1A02G078400
T4000875	TraesCS1A02G078400
T4000876	TraesCS1A02G078500
T4000877		TraesCS2A02G166400
T4000878	TraesCS1A02G078600
T4000879	TraesCS1A02G078600
T4000880	TraesCS1A02G078600
T4000881	TraesCS1A02G078700
T4000882	TraesCS1A02G078800
T4000883	TraesCS1A02G078900
T4000884	TraesCS1A02G079000
T4000885	TraesCS1A02G079100
T4000886	TraesCS1A02G079200
T4000887	TraesCS1A02G079300
T4000888		TraesCS1D02G081000
T4000889	TraesCS1A02G079400
T4000890	TraesCSU02G108600
T4000891	TraesCS1A02G079500
T4000892	TraesCS1A02G079900
T4000893	TraesCS1A02G080000
T4000894	TraesCS1A02G080100
T4000895	TraesCS1A02G080200
T4000896	TraesCS1A02G080300
T4000897	TraesCS1A02G080400
T4000898	TraesCS1A02G080500
T4000899	TraesCS1A02G080600
T4000900		TraesCS7D02G247100
T4000901	TraesCS1A02G080700
T4000902	TraesCS1A02G081000
T4000903	TraesCS1A02G081100
T4000904	TraesCS1A02G081200
T4000905	TraesCS1A02G081800
T4000906		TraesCS1B02G099400
T4000907	TraesCS1A02G081900
T4000908	TraesCS1A02G081700
T4000909	TraesCS1A02G082000
T4000910	TraesCS1A02G082100
T4000911	TraesCS1A02G082200
T4000912	TraesCS1A02G082300
T4000913	TraesCS1A02G082400
T4000914	TraesCS1A02G082500
T4000915	TraesCS1A02G082600
T4000916	TraesCS1A02G082700
T4000917	TraesCS1A02G082800
T4000918	TraesCS1A02G083000
T4000919	TraesCS1A02G083100
T4000920	TraesCS1A02G083300
T4000921	TraesCS1A02G083400
T4000922	TraesCS1A02G083500
T4000923		TraesCS4A02G371300
T4000924	TraesCS1A02G083600
T4000925	TraesCS1A02G083700
T4000926	TraesCS1A02G083800
T4000927	TraesCS1A02G084200
T4000928	TraesCS1A02G084300
T4000929	TraesCS1A02G084500
T4000930	TraesCS1A02G084400
T4000931	TraesCS1A02G084600
T4000932	TraesCS1A02G084700
T4000933	TraesCS1A02G084800
T4000934	TraesCS1A02G084800
T4000935	TraesCS1A02G084900
T4000936	TraesCS1A02G085100
T4000937	TraesCS1A02G085200
T4000938	TraesCS1A02G342200
T4000939	TraesCS1A02G085300
T4000940	TraesCS1A02G085300
T4000941	TraesCS1A02G085400
T4000942	TraesCS1A02G085500
T4000943	TraesCS1A02G085600
T4000944	TraesCS1A02G085700
T4000945	TraesCS1A02G085800
T4000946	TraesCS1A02G085900
T4000947	TraesCS1A02G086000
T4000948		TraesCS4A02G345900
T4000949		TraesCS1B02G104400
T4000950		TraesCS1B02G104500
T4000951	TraesCS1A02G086100
T4000952	TraesCS1A02G086200
T4000953		TraesCS1B02G104600
T4000954	TraesCS1A02G086300
T4000955	TraesCS1A02G086400
T4000956	TraesCS1A02G086500
T4000957	TraesCS1A02G086600
T4000958	TraesCS1A02G086700
T4000959	TraesCS1A02G086800
T4000960	TraesCS1A02G086900
T4000961	TraesCS1A02G087000
T4000962	TraesCS1A02G087100
T4000963	TraesCS1A02G087200
T4000964	TraesCS1A02G087300
T4000965	TraesCS1A02G087400
T4000966	TraesCS1A02G087500
T4000967	TraesCS1A02G087600
T4000968	TraesCS1A02G087700
T4000969	TraesCS1A02G087900
T4000970	TraesCS1A02G088000
T4000971	TraesCS1A02G088000
T4000972	TraesCS1A02G088100
T4000973	TraesCS1A02G088200
T4000974	TraesCS1A02G088300
T4000975		TraesCS4A02G231500
T4000976	TraesCS1A02G088600
T4000977	TraesCS1A02G088700
T4000978	TraesCS1A02G088800
T4000979		TraesCS1B02G107800
T4000980	TraesCS1A02G088900
T4000981	TraesCS1A02G089000
T4000982	TraesCS1A02G089100
T4000983	TraesCS1A02G089200
T4000984	TraesCS1A02G089300
T4000985	TraesCS1A02G089400
T4000986	TraesCS1A02G089500
T4000987	TraesCS1A02G089600
T4000988	TraesCS1A02G089700
T4000989		TraesCS1B02G117800
T4000990	TraesCS1A02G089800
T4000991	TraesCS1A02G089900
T4000992	TraesCS1A02G090000
T4000993	TraesCS1A02G090100
T4000994	TraesCS1A02G090200
T4000995	TraesCS1A02G090300
T4000996	TraesCS1A02G090400
T4000997	TraesCS1A02G090400
T4000998	TraesCS1A02G090600
T4000999	TraesCS1A02G090700
T4001000		TraesCS2B02G450800
T4001001	TraesCS1A02G090800
T4001002	TraesCS1A02G090900
T4001003	TraesCS1A02G091000
T4001004		TraesCS1B02G118900
T4001005	TraesCS1A02G091100
T4001006	TraesCS1A02G091200
T4001007	TraesCS1A02G091300
T4001008	TraesCS1A02G091400
T4001009	TraesCS1A02G091500
T4001010	TraesCS1A02G091600
T4001011	TraesCS1A02G091900
T4001012	TraesCS1A02G092000
T4001013	TraesCS1A02G092100
T4001014		TraesCS6B02G233600
T4001015	TraesCS1A02G092200
T4001016	TraesCS1A02G092300
T4001017	TraesCS1A02G092400
T4001018	TraesCS1A02G092500
T4001019	TraesCS1A02G092600
T4001020	TraesCS1A02G092700
T4001021	TraesCS1A02G092800
T4001022	TraesCS1A02G092900
T4001023	TraesCS1A02G092800
T4001024	TraesCS1A02G092900
T4001025	TraesCS1A02G093000
T4001026	TraesCS1A02G093100
T4001027	TraesCS1A02G093200
T4001028	TraesCS1A02G093400
T4001029	TraesCS1A02G093500
T4001030	TraesCS1A02G093600
T4001031	TraesCS1A02G093700
T4001032	TraesCS1A02G093800
T4001033	TraesCS1A02G093900
T4001034	TraesCS1A02G094000
T4001035	TraesCS1A02G094100
T4001036	TraesCS1A02G094200
T4001037	TraesCS1A02G094300
T4001038	TraesCS1A02G094500
T4001039	TraesCS1A02G094600
T4001040	TraesCS1A02G094700
T4001041	TraesCS1A02G094800
T4001042	TraesCS1A02G094900
T4001043	TraesCS1A02G095000
T4001044	TraesCS1A02G095100
T4001045	TraesCS1A02G095200
T4001046	TraesCS1A02G095300
T4001047	TraesCS1A02G095400
T4001048	TraesCS1A02G095500
T4001049	TraesCS1A02G095600
T4001050	TraesCS1A02G095700
T4001051	TraesCS1A02G095800
T4001052	TraesCS1A02G095900
T4001053	TraesCS1A02G096000
T4001054	TraesCS1A02G096100
T4001055	TraesCS1A02G096200
T4001056	TraesCS1A02G096300
T4001057	TraesCS1A02G096400
T4001058		TraesCS4B02G280500
T4001059		TraesCS4B02G280400
T4001060	TraesCS1A02G096500
T4001061	TraesCS1A02G096600
T4001062	TraesCS1A02G096700
T4001063	TraesCS1A02G096800
T4001064	TraesCS1A02G096900
T4001065	TraesCS1A02G097000
T4001066	TraesCS1A02G097100
T4001067	TraesCS1A02G097200
T4001068	TraesCS1A02G097300
T4001069	TraesCS1A02G097400
T4001070	TraesCS1A02G097500
T4001071	TraesCS1A02G097600
T4001072	TraesCS1A02G097700
T4001073	TraesCS1A02G098100
T4001074	TraesCS1A02G098000
T4001075	TraesCS1A02G097900
T4001076	TraesCS1A02G097800
T4001077	TraesCS1A02G098200
T4001078	TraesCSU02G241300
T4001079	TraesCS2B02G283000
T4001080	TraesCS1A02G098200
T4001081	TraesCS7A02G164700
T4001082	TraesCS1A02G098300
T4001083	TraesCS1A02G098400
T4001084	TraesCS1A02G098500
T4001085	TraesCSU02G241300
T4001086	TraesCSU02G170800
T4001087	TraesCS6D02G201100
T4001088	TraesCS1A02G098700
T4001089	TraesCS1A02G098800
T4001090	TraesCS1A02G098900
T4001091		TraesCS7A02G267300
T4001092		TraesCS7A02G267400
T4001093		TraesCS7A02G267500
T4001094	TraesCS1A02G099200
T4001095		TraesCS1D02G106700
T4001096	TraesCS1A02G099500
T4001097	TraesCS1A02G099600
T4001098	TraesCS1A02G099700
T4001099	TraesCS1A02G099800
T4001100	TraesCS1A02G099900
T4001101	TraesCS1A02G100000
T4001102	TraesCS1A02G100100
T4001103	TraesCS1A02G100200
T4001104	TraesCS1A02G100300
T4001105	TraesCS1A02G100400
T4001106	TraesCS1A02G100500
T4001107	TraesCS1A02G100600
T4001108		TraesCS5A02G008400
T4001109	TraesCS1A02G100700
T4001110	TraesCS1A02G100800
T4001111		TraesCS2A02G154700
T4001112	TraesCS1A02G101000
T4001113	TraesCS1A02G101100
T4001114	TraesCS1A02G101200
T4001115	TraesCS1A02G101300
T4001116	TraesCS1A02G101900
T4001117	TraesCS1A02G102000
T4001118	TraesCS1A02G102100
T4001119	TraesCS1A02G101400
T4001120	TraesCS1A02G101500
T4001121	TraesCS1A02G101600
T4001122	TraesCS1A02G101700
T4001123	TraesCS1A02G101800
T4001124	TraesCS1A02G101900
T4001125	TraesCS1A02G102000
T4001126	TraesCS1A02G102100
T4001127	TraesCS1A02G102400
T4001128	TraesCS1A02G102500
T4001129	TraesCS1A02G102600
T4001130	TraesCS1A02G102700
T4001131	TraesCS1A02G102800
T4001132	TraesCS1A02G102900
T4001133	TraesCS1A02G103000
T4001134	TraesCS1A02G103013
T4001135	TraesCS1A02G103014
T4001136	TraesCS1A02G103019
T4001137	TraesCS1A02G103100
T4001138	TraesCSU02G210700
T4001139	TraesCSU02G210700
T4001140	TraesCSU02G210700
T4001141	TraesCS1A02G103400
T4001142	TraesCS1A02G103500
T4001143		TraesCS1B02G181800
T4001144	TraesCS1A02G103600
T4001145	TraesCS1A02G103700
T4001146	TraesCS1A02G103800
T4001147	TraesCS1A02G103900
T4001148		TraesCS5A02G013800
T4001149	TraesCS5A02G013900
T4001150		TraesCS5A02G014000
T4001151	TraesCS1A02G104000
T4001152	TraesCS1A02G104100
T4001153	TraesCS1A02G104200
T4001154	TraesCS1A02G104300
T4001155	TraesCS1A02G104500
T4001156	TraesCS1A02G104600
T4001157	TraesCS1A02G104700
T4001158		TraesCS5D02G063400
T4001159	TraesCS1A02G104800
T4001160	TraesCS1A02G104900
T4001161	TraesCS1A02G105000
T4001162	TraesCS1A02G105100
T4001163	TraesCS1A02G105200
T4001164	TraesCS1A02G105500
T4001165		TraesCS1D02G109600
T4001166	TraesCS1A02G105600
T4001167	TraesCS1A02G105700
T4001168	TraesCS1A02G106100
T4001169	TraesCS1A02G106200
T4001170	TraesCS1A02G106300
T4001171	TraesCS1A02G106400
T4001172	TraesCS1A02G106500
T4001173	TraesCS1A02G106700
T4001174	TraesCS1A02G106800
T4001175	TraesCS1A02G106900
T4001176	TraesCS1A02G107000
T4001177	TraesCS1A02G107100
T4001178	TraesCS1A02G107200
T4001179	TraesCS1A02G107300
T4001180	TraesCS1A02G107400
T4001181	TraesCS1A02G107500
T4001182	TraesCS1A02G107600
T4001183	TraesCS1A02G107700
T4001184	TraesCS1A02G107800
T4001185	TraesCS1A02G107900
T4001186	TraesCS1A02G108000
T4001187	TraesCS1A02G108100
T4001188	TraesCS1A02G108200
T4001189	TraesCS1A02G108300
T4001190	TraesCS1A02G108400
T4001191	TraesCS1A02G108500
T4001192	TraesCS1A02G108600
T4001193	TraesCS1A02G108900
T4001194	TraesCS1A02G109000
T4001195	TraesCS1A02G109100
T4001196	TraesCS1A02G109200
T4001197		TraesCS1B02G108800
T4001198	TraesCS1A02G109300
T4001199	TraesCS1A02G109400
T4001200		TraesCS3A02G452600
T4001201	TraesCS1A02G110100
T4001202	TraesCS1A02G110200
T4001203	TraesCS1A02G110300
T4001204	TraesCS1A02G110400
T4001205	TraesCS1A02G110500
T4001206	TraesCS1A02G110600
T4001207	TraesCS1A02G110700
T4001208	TraesCS1A02G111000
T4001209	TraesCS1A02G111100
T4001210	TraesCSU02G151300
T4001211	TraesCS1A02G111300
T4001212	TraesCS1A02G111400
T4001213	TraesCS1A02G111500
T4001214	TraesCS1A02G111600
T4001215	TraesCS1A02G111700
T4001216	TraesCS1A02G111800
T4001217	TraesCS1A02G111900
T4001218	TraesCS1A02G112100
T4001219	TraesCS1A02G112200
T4001220	TraesCS1A02G112000
T4001221		TraesCS1B02G132400
T4001222	TraesCS1A02G112200
T4001223	TraesCS1A02G112300
T4001224	TraesCS1A02G112400
T4001225	TraesCS1A02G112500
T4001226	TraesCS1A02G112600
T4001227	TraesCS1A02G112700
T4001228	TraesCS1A02G112800
T4001229	TraesCS1A02G112900
T4001230	TraesCS1A02G113000
T4001231	TraesCS1A02G113100
T4001232	TraesCS1A02G113200
T4001233	TraesCS1A02G113300
T4001234	TraesCS1A02G113400
T4001235	TraesCS1A02G113500
T4001236	TraesCS1A02G113800
T4001237	TraesCS1A02G113900
T4001238	TraesCS1A02G114000
T4001239	TraesCS1A02G114100
T4001240	TraesCS1A02G114500
T4001241	TraesCS1A02G114300
T4001242	TraesCS1A02G114400
T4001243	TraesCS1A02G114600
T4001244	TraesCS1A02G114700
T4001245	TraesCS1A02G114800
T4001246	TraesCS1A02G114900
T4001247	TraesCS1A02G115000
T4001248	TraesCS1A02G115200
T4001249	TraesCS1A02G115300
T4001250	TraesCS1A02G115400
T4001251	TraesCS1A02G115500
T4001252	TraesCS1A02G115600
T4001253	TraesCS1A02G115700
T4001254	TraesCS1A02G115800
T4001255	TraesCS1A02G116100
T4001256	TraesCS1A02G116200
T4001257	TraesCS1A02G116300
T4001258	TraesCS1A02G116400
T4001259	TraesCS1A02G116500
T4001260	TraesCS1A02G116600
T4001261	TraesCS1A02G116700
T4001262	TraesCS1A02G116800
T4001263	TraesCS1A02G116900
T4001264	TraesCS1A02G117000
T4001265	TraesCS1A02G117100
T4001266	TraesCS1A02G117200
T4001267	TraesCS1A02G117500
T4001268	TraesCS1A02G117600
T4001269	TraesCS1A02G117700
T4001270	TraesCS1A02G117800
T4001271	TraesCS1A02G117900
T4001272	TraesCS1A02G118000
T4001273	TraesCS1A02G118100
T4001274	TraesCS1A02G118200
T4001275	TraesCS1A02G118300
T4001276	TraesCS1A02G118400
T4001277	TraesCS1A02G118500
T4001278	TraesCS1A02G118700
T4001279	TraesCS1A02G118800
T4001280	TraesCS1A02G118900
T4001281	TraesCS1A02G119000
T4001282	TraesCS1A02G119100
T4001283	TraesCS1A02G119200
T4001284	TraesCS1A02G119400
T4001285	TraesCS1A02G119500
T4001286	TraesCS1A02G119700
T4001287	TraesCS1A02G119800
T4001288	TraesCS1A02G119900
T4001289	TraesCS1A02G120000
T4001290	TraesCS1A02G120100
T4001291	TraesCS1A02G120200
T4001292	TraesCS1A02G120300
T4001293	TraesCS1A02G120400
T4001294	TraesCS1A02G120500
T4001295	TraesCS1A02G120600
T4001296	TraesCS1A02G120700
T4001297	TraesCS1A02G120800
T4001298	TraesCS1A02G120900
T4001299	TraesCS1A02G121000
T4001300	TraesCS1A02G121100
T4001301	TraesCS1A02G121200
T4001302	TraesCS1A02G121300
T4001303	TraesCS1A02G121400
T4001304	TraesCS1A02G121500
T4001305	TraesCS1A02G121600
T4001306	TraesCS1A02G121700
T4001307	TraesCS1A02G121800
T4001308	TraesCS1A02G122000
T4001309	TraesCS1A02G122100
T4001310	TraesCS1A02G122200
T4001311		TraesCS1B02G141400
T4001312	TraesCS1A02G122300
T4001313	TraesCS1A02G122400
T4001314	TraesCS1A02G122500
T4001315	TraesCS1A02G122600
T4001316	TraesCS1A02G122700
T4001317	TraesCS1A02G122800
T4001318	TraesCS1A02G123000
T4001319	TraesCS1A02G123100
T4001320	TraesCS1A02G123200
T4001321	TraesCS1A02G123600
T4001322	TraesCS1A02G123700
T4001323	TraesCS1A02G123800
T4001324	TraesCS1A02G123900
T4001325	TraesCS1A02G124100
T4001326	TraesCS1A02G124000
T4001327	TraesCS1A02G124100
T4001328	TraesCS1A02G124200
T4001329	TraesCS1A02G124300
T4001330	TraesCS1A02G124400
T4001331	TraesCS1A02G124500
T4001332	TraesCS1A02G124600
T4001333		TraesCS7A02G108000
T4001334		TraesCS7A02G108100
T4001335		TraesCS7A02G108200
T4001336		TraesCS5A02G459300
T4001337		TraesCS7A02G108300
T4001338	TraesCS1A02G124700
T4001339	TraesCS1A02G124800
T4001340	TraesCS1A02G124900
T4001341	TraesCS1A02G125000
T4001342	TraesCS1A02G125100
T4001343	TraesCS1A02G125200
T4001344	TraesCS1A02G125400
T4001345		TraesCS1B02G144500
T4001346	TraesCS1A02G125500
T4001347	TraesCS1A02G125600
T4001348	TraesCS1A02G125700
T4001349	TraesCS1A02G125800
T4001350	TraesCS1A02G125900
T4001351	TraesCS1A02G126000
T4001352	TraesCS1A02G126100
T4001353	TraesCS1A02G126200
T4001354	TraesCS1A02G126500
T4001355	TraesCS1A02G126700
T4001356	TraesCS1A02G126800
T4001357	TraesCS1A02G126900
T4001358	TraesCS1A02G127000
T4001359	TraesCS1A02G127100
T4001360	TraesCS1A02G127200
T4001361	TraesCS1A02G127300
T4001362	TraesCS1A02G127400
T4001363	TraesCS1A02G127500
T4001364	TraesCS1A02G127600
T4001365	TraesCS1A02G127700
T4001366	TraesCS1A02G127800
T4001367	TraesCS1A02G127900
T4001368	TraesCS1A02G128000
T4001369	TraesCS1A02G128100
T4001370	TraesCS1A02G128200
T4001371	TraesCS1A02G128300
T4001372	TraesCS1A02G128500
T4001373	TraesCS1A02G128600
T4001374	TraesCS1A02G128700
T4001375	TraesCS1A02G128900
T4001376	TraesCS1A02G129000
T4001377	TraesCS1A02G129100
T4001378	TraesCS1A02G129200
T4001379	TraesCS1A02G245900
T4001380	TraesCS1A02G129300
T4001381	TraesCS1A02G129400
T4001382		TraesCS7A02G337100
T4001383	TraesCS1A02G129600
T4001384	TraesCS1A02G129700
T4001385	TraesCS1A02G129800
T4001386	TraesCS1A02G129900
T4001387	TraesCS1A02G130000
T4001388	TraesCS1A02G130100
T4001389	TraesCS1A02G130200
T4001390	TraesCS1A02G130300
T4001391	TraesCS1A02G130400
T4001392	TraesCS1A02G130500
T4001393	TraesCS1A02G130600
T4001394	TraesCS1A02G130700
T4001395	TraesCS1A02G130800
T4001396	TraesCS1A02G130900
T4001397	TraesCS1A02G131000
T4001398	TraesCS1A02G131100
T4001399	TraesCS1A02G131400
T4001400	TraesCS1A02G131500
T4001401	TraesCS1A02G131600
T4001402	TraesCS1A02G131700
T4001403	TraesCS1A02G131800
T4001404	TraesCS1A02G129500
T4001405	TraesCSU02G000900
T4001406	TraesCS1A02G132300
T4001407	TraesCS1A02G132400
T4001408	TraesCS1A02G134000
T4001409	TraesCS1A02G132500
T4001410	TraesCS1A02G132600
T4001411	TraesCS1A02G132700
T4001412	TraesCS1A02G132800
T4001413	TraesCS1A02G132900
T4001414	TraesCS1A02G133000
T4001415	TraesCS1A02G133100
T4001416	TraesCS1A02G133200
T4001417	TraesCS1A02G133300
T4001418		TraesCS6D02G396300
T4001419	TraesCS1A02G133400
T4001420	TraesCS1A02G133500
T4001421	TraesCS1A02G133600
T4001422	TraesCS1A02G133700
T4001423	TraesCS1A02G133800
T4001424	TraesCS1A02G133900
T4001425		TraesCS3B02G468000
T4001426	TraesCS1A02G134100
T4001427	TraesCS1A02G134200
T4001428	TraesCS1A02G134300
T4001429	TraesCS1A02G134400
T4001430	TraesCS1A02G134500
T4001431	TraesCS1A02G134600
T4001432	TraesCS1A02G134700
T4001433	TraesCS1A02G134800
T4001434	TraesCS1A02G134900
T4001435	TraesCS1A02G135000
T4001436		TraesCS4B02G254700
T4001437		TraesCS4B02G254600
T4001438		TraesCS4B02G254500
T4001439		TraesCS4B02G254400
T4001440	TraesCS1A02G135100
T4001441		TraesCS1B02G150500
T4001442	TraesCS1A02G135300
T4001443	TraesCS1A02G135600
T4001444	TraesCS1A02G135700
T4001445	TraesCS1A02G135800
T4001446	TraesCS1A02G135900
T4001447	TraesCS1A02G136000
T4001448	TraesCS1A02G136100
T4001449	TraesCS1A02G136200
T4001450	TraesCS1A02G136300
T4001451		TraesCS5D02G569800
T4001452	TraesCS1A02G136600
T4001453	TraesCS1A02G136700
T4001454	TraesCS1A02G136800
T4001455	TraesCS7A02G175800
T4001456	TraesCS1A02G136900
T4001457		TraesCS1D02G137800
T4001458	TraesCS1A02G137000
T4001459	TraesCS1A02G137100
T4001460	TraesCS1A02G137200
T4001461	TraesCS1A02G137300
T4001462	TraesCS1A02G137400
T4001463	TraesCS1A02G137500
T4001464	TraesCS1A02G137600
T4001465		TraesCS1B02G148900
T4001466	TraesCS1A02G137700
T4001467	TraesCS1A02G137800
T4001468	TraesCS1A02G138000
T4001469	TraesCS1A02G138100
T4001470	TraesCS1A02G138200
T4001471	TraesCS1A02G138300
T4001472	TraesCS1A02G138500
T4001473	TraesCS1A02G138600
T4001474	TraesCS1A02G138700
T4001475	TraesCS1A02G138800
T4001476	TraesCS1A02G138800
T4001477	TraesCS1A02G138900
T4001478	TraesCS1A02G139000
T4001479	TraesCS1A02G139100
T4001480	TraesCS1A02G139200
T4001481	TraesCS1A02G139300
T4001482	TraesCS1A02G139400
T4001483	TraesCS1A02G139500
T4001484	TraesCS1A02G090500
T4001485	TraesCS1A02G139600
T4001486	TraesCS1A02G139700
T4001487	TraesCS1A02G140000
T4001488	TraesCS1A02G140100
T4001489	TraesCS1A02G140400
T4001490	TraesCS1A02G140300
T4001491	TraesCS1A02G140600
T4001492	TraesCS1A02G140700
T4001493	TraesCS1A02G140800
T4001494	TraesCS1A02G140900
T4001495	TraesCS1A02G141000
T4001496	TraesCS1A02G141100
T4001497	TraesCS1A02G141200
T4001498	TraesCS1A02G141300
T4001499	TraesCS1A02G141400
T4001500	TraesCS1A02G141500
T4001501	TraesCS1A02G141600
T4001502	TraesCS1A02G141700
T4001503	TraesCS1A02G141800
T4001504	TraesCS1A02G141900
T4001505	TraesCSU02G205200
T4001506	TraesCSU02G181200
T4001507	TraesCSU02G084100
T4001508	TraesCSU02G168400
T4001509	TraesCS1A02G142000
T4001510	TraesCS1A02G142100
T4001511	TraesCS1A02G142200
T4001512	TraesCS1A02G142300
T4001513	TraesCS1A02G142400
T4001514		TraesCS4B02G312600
T4001515	TraesCS1A02G142500
T4001516	TraesCS1A02G142600
T4001517	TraesCS1A02G142700
T4001518	TraesCS1A02G142800
T4001519	TraesCS1A02G142900
T4001520	TraesCS1A02G143000
T4001521	TraesCS1A02G143100
T4001522	TraesCS1A02G143200
T4001523	TraesCS1A02G143300
T4001524	TraesCS1A02G143400
T4001525	TraesCS1A02G143500
T4001526	TraesCS1A02G143600
T4001527	TraesCS1A02G143700
T4001528	TraesCS1A02G143800
T4001529	TraesCS1A02G144400
T4001530	TraesCS1A02G144500
T4001531	TraesCS1A02G144600
T4001532	TraesCS1A02G144700
T4001533	TraesCS1A02G144900
T4001534	TraesCS1A02G144800
T4001535	TraesCS1A02G145000
T4001536	TraesCS1A02G145100
T4001537	TraesCS1A02G145300
T4001538	TraesCS1A02G145400
T4001539	TraesCS1A02G145500
T4001540	TraesCS1A02G145600
T4001541	TraesCS1A02G145700
T4001542	TraesCS1A02G145800
T4001543	TraesCS1A02G145900
T4001544	TraesCS1A02G146000
T4001545	TraesCS1A02G146200
T4001546	TraesCS1A02G146400
T4001547	TraesCS1A02G146500
T4001548	TraesCS1A02G146600
T4001549	TraesCS1A02G146500
T4001550	TraesCS1A02G146500
T4001551	TraesCS1A02G146700
T4001552	TraesCS1A02G146800
T4001553	TraesCS1A02G146900
T4001554	TraesCS1A02G147200
T4001555	TraesCS1A02G147300
T4001556	TraesCS1A02G147400
T4001557	TraesCS1A02G147500
T4001558	TraesCS1A02G147600
T4001559	TraesCS1A02G147700
T4001560	TraesCS1A02G147800
T4001561	TraesCS1A02G148000
T4001562	TraesCS1A02G148100
T4001563	TraesCS1A02G148300
T4001564	TraesCS1A02G148400
T4001565	TraesCS1A02G148500
T4001566	TraesCS1A02G148600
T4001567	TraesCS1A02G148700
T4001568	TraesCS1A02G148800
T4001569	TraesCS1A02G148900
T4001570	TraesCS1A02G149000
T4001571	TraesCS1A02G149100
T4001572	TraesCS1A02G149200
T4001573	TraesCS1A02G149300
T4001574	TraesCS1A02G149400
T4001575	TraesCS1A02G149500
T4001576	TraesCS1A02G149600
T4001577	TraesCS1A02G149700
T4001578	TraesCS1A02G149800
T4001579	TraesCS1A02G150000
T4001580	TraesCS1A02G150100
T4001581		TraesCS3A02G302200
T4001582	TraesCS1A02G150200
T4001583	TraesCS1A02G150300
T4001584	TraesCS1A02G150400
T4001585	TraesCS1A02G150500
T4001586	TraesCS1A02G151000
T4001587	TraesCS1A02G151100
T4001588	TraesCS1A02G151200
T4001589	TraesCS1A02G151300
T4001590	TraesCS1A02G151400
T4001591	TraesCS1A02G151500
T4001592	TraesCS1A02G151600
T4001593	TraesCS1A02G151700
T4001594	TraesCS1A02G151900
T4001595		TraesCS2A02G182700
T4001596	TraesCS1A02G152000
T4001597	TraesCS1A02G152100
T4001598	TraesCS1A02G152200
T4001599	TraesCS1A02G152300
T4001600	TraesCS1A02G152500
T4001601	TraesCS1A02G152600
T4001602	TraesCS1A02G152700
T4001603		TraesCS1D02G149800
T4001604	TraesCS1A02G152800
T4001605	TraesCS1A02G152900
T4001606	TraesCS1A02G153000
T4001607	TraesCS1A02G153200
T4001608	TraesCS1A02G153300
T4001609	TraesCS1A02G153400
T4001610	TraesCS1A02G153500
T4001611	TraesCS1A02G153600
T4001612	TraesCS1A02G153700
T4001613	TraesCS1A02G153800
T4001614	TraesCS1A02G150900
T4001615	TraesCS1A02G150800
T4001616	TraesCS1A02G150700
T4001617	TraesCS1A02G150600
T4001618	TraesCS1A02G240400
T4001619	TraesCS1A02G240300
T4001620		TraesCS1B02G252400
T4001621		TraesCS6D02G378400
T4001622		TraesCS6A02G392700
T4001623	TraesCS1A02G153900
T4001624	TraesCS1A02G154000
T4001625	TraesCS1A02G154100
T4001626	TraesCS1A02G154200
T4001627	TraesCS1A02G154300
T4001628	TraesCS1A02G154500
T4001629	TraesCS1A02G154600
T4001630	TraesCS1A02G154700
T4001631		TraesCS4A02G157900
T4001632	TraesCS4A02G157800
T4001633		TraesCS4A02G157700
T4001634	TraesCS1A02G154800
T4001635	TraesCS1A02G154900
T4001636	TraesCS1A02G155000
T4001637	TraesCS1A02G155200
T4001638		TraesCS1D02G153900
T4001639	TraesCS1A02G155300
T4001640	TraesCS1A02G155400
T4001641	TraesCS1A02G155500
T4001642	TraesCS1A02G155600
T4001643		TraesCS6D02G112700
T4001644		TraesCS6D02G112500
T4001645	TraesCS1A02G155700
T4001646	TraesCS1A02G155800
T4001647	TraesCS1A02G155900
T4001648	TraesCS1A02G156000
T4001649		TraesCS1D02G154400
T4001650	TraesCS1A02G384900
T4001651		TraesCS7A02G069500
T4001652	TraesCS1A02G156100
T4001653	TraesCS1A02G156200
T4001654	TraesCS1A02G156300
T4001655	TraesCS1A02G156400
T4001656	TraesCS1A02G156900
T4001657	TraesCS1A02G041000
T4001658	TraesCS1A02G157100
T4001659	TraesCS1A02G157200
T4001660	TraesCS1A02G157300
T4001661	TraesCS1A02G157400
T4001662	TraesCS1A02G157500
T4001663	TraesCS1A02G157600
T4001664	TraesCS1A02G157700
T4001665	TraesCS1A02G157800
T4001666	TraesCS1A02G157900
T4001667	TraesCS1A02G158100
T4001668	TraesCS1A02G158200
T4001669		TraesCS1B02G174200
T4001670	TraesCS1A02G158300
T4001671	TraesCS1A02G158400
T4001672	TraesCS1A02G158500
T4001673	TraesCS1A02G158600
T4001674	TraesCS1A02G158700
T4001675	TraesCS1A02G158800
T4001676	TraesCS1A02G158900
T4001677	TraesCS1A02G159000
T4001678	TraesCS1A02G159100
T4001679	TraesCS1A02G159200
T4001680	TraesCS1A02G159300
T4001681	TraesCS1A02G159400
T4001682	TraesCS1A02G159500
T4001683	TraesCS1A02G159600
T4001684	TraesCS1A02G159700
T4001685	TraesCS1A02G159800
T4001686	TraesCS1A02G159900
T4001687	TraesCS1A02G160000
T4001688	TraesCS1A02G160200
T4001689	TraesCS1A02G160300
T4001690	TraesCS1B02G176200
T4001691	TraesCS1A02G160500
T4001692		TraesCS1D02G157400
T4001693	TraesCS1A02G160400
T4001694	TraesCS1A02G160600
T4001695		TraesCS1B02G177400
T4001696	TraesCS1A02G160800
T4001697	TraesCS1A02G160900
T4001698	TraesCS1A02G161000
T4001699	TraesCS1A02G161100
T4001700	TraesCS1A02G161200
T4001701	TraesCS1A02G161300
T4001702	TraesCS1A02G161400
T4001703	TraesCS1A02G161500
T4001704	TraesCS1A02G161600
T4001705	TraesCS1A02G161700
T4001706	TraesCS1A02G161800
T4001707	TraesCS1A02G161900
T4001708	TraesCS1A02G162000
T4001709	TraesCS1A02G162100
T4001710	TraesCS1A02G162200
T4001711	TraesCS1A02G162300
T4001712	TraesCS1A02G162400
T4001713	TraesCS1A02G162500
T4001714	TraesCS1A02G162500
T4001715	TraesCS1A02G163000
T4001716	TraesCS1A02G163100
T4001717	TraesCS1A02G163200
T4001718	TraesCS7D02G211600
T4001719	TraesCS1A02G163400
T4001720	TraesCS1A02G163500
T4001721	TraesCS1A02G163600
T4001722	TraesCS1A02G163700
T4001723	TraesCS1A02G163800
T4001724	TraesCS1A02G163900
T4001725	TraesCS1A02G164000
T4001726	TraesCS1A02G164100
T4001727	TraesCS1A02G164200
T4001728	TraesCS1A02G164300
T4001729	TraesCS1A02G164400
T4001730	TraesCS1A02G164500
T4001731		TraesCS1B02G181400
T4001732	TraesCS1A02G164600
T4001733	TraesCS1A02G164700
T4001734	TraesCS1A02G164800
T4001735	TraesCS1A02G165300
T4001736	TraesCS1A02G165400
T4001737	TraesCS1A02G165500
T4001738	TraesCS1A02G165600
T4001739	TraesCS1A02G165700
T4001740	TraesCS1A02G165900
T4001741	TraesCS1A02G166000
T4001742	TraesCS1A02G166100
T4001743	TraesCS1A02G166200
T4001744	TraesCS1A02G166300
T4001745	TraesCS1A02G166300
T4001746	TraesCS1A02G166400
T4001747	TraesCS1A02G166500
T4001748	TraesCS1A02G166600
T4001749	TraesCS1A02G166800
T4001750	TraesCS1A02G166900
T4001751	TraesCS1A02G167000
T4001752	TraesCS1A02G167100
T4001753	TraesCS1A02G167200
T4001754	TraesCS1A02G167300
T4001755	TraesCS1A02G167400
T4001756	TraesCS1A02G167500
T4001757	TraesCS1A02G167600
T4001758	TraesCS1A02G167700
T4001759	TraesCS1A02G167800
T4001760	TraesCS1A02G167900
T4001761		TraesCS5A02G282500
T4001762		TraesCS1B02G184400
T4001763	TraesCS1A02G168100
T4001764	TraesCS1A02G168200
T4001765	TraesCS1A02G168300
T4001766	TraesCS1A02G168400
T4001767	TraesCS1A02G168500
T4001768	TraesCS1A02G168600
T4001769	TraesCS1A02G168700
T4001770	TraesCS1A02G168800
T4001771	TraesCS1A02G168900
T4001772		TraesCS1D02G167000
T4001773	TraesCS1A02G169000
T4001774	TraesCS1A02G169200
T4001775	TraesCS1A02G169300
T4001776	TraesCS1A02G169400
T4001777	TraesCS1A02G169500
T4001778	TraesCS1A02G173500
T4001779	TraesCS1A02G169600
T4001780	TraesCS1A02G169700
T4001781	TraesCS1A02G169800
T4001782	TraesCS1A02G169900
T4001783	TraesCS1A02G170100
T4001784	TraesCS1A02G170200
T4001785		TraesCS6B02G341200
T4001786		TraesCS2B02G236100
T4001787	TraesCS1A02G170300
T4001788	TraesCS1A02G170400
T4001789	TraesCS1A02G170500
T4001790	TraesCS1A02G170600
T4001791	TraesCS1A02G170700
T4001792	TraesCS1A02G170800
T4001793	TraesCS1A02G170900
T4001794	TraesCS1A02G171000
T4001795	TraesCS1A02G171100
T4001796	TraesCS1A02G171200
T4001797	TraesCS1A02G171300
T4001798	TraesCS1A02G171400
T4001799	TraesCS1A02G171500
T4001800	TraesCS1A02G171600
T4001801	TraesCS1A02G171700
T4001802	TraesCS1A02G171800
T4001803	TraesCS1A02G171900
T4001804	TraesCS1A02G172100
T4001805	TraesCS1A02G172200
T4001806	TraesCS1A02G172300
T4001807	TraesCS1A02G172400
T4001808		TraesCS4A02G358200
T4001809	TraesCS1A02G172600
T4001810	TraesCS1A02G172700
T4001811	TraesCS1A02G172800
T4001812	TraesCS1A02G172900
T4001813	TraesCS1A02G173000
T4001814	TraesCS1A02G173100
T4001815	TraesCS1A02G173200
T4001816	TraesCS1A02G173300
T4001817	TraesCS1A02G173600
T4001818	TraesCS1A02G173700
T4001819	TraesCS1A02G173800
T4001820	TraesCS1A02G173900
T4001821	TraesCS1A02G174000
T4001822	TraesCS1A02G174100
T4001823	TraesCS1A02G174200
T4001824	TraesCS1A02G174300
T4001825	TraesCS1A02G174400
T4001826	TraesCS1A02G174500
T4001827	TraesCS1A02G174600
T4001828	TraesCS1A02G174700
T4001829	TraesCS1A02G174900
T4001830		TraesCS1B02G189800
T4001831	TraesCS1A02G175000
T4001832	TraesCS1A02G175100
T4001833	TraesCS1A02G175200
T4001834	TraesCS1A02G175300
T4001835	TraesCS1A02G175300
T4001836	TraesCS1A02G175500
T4001837	TraesCS1A02G175600
T4001838	TraesCS1A02G175700
T4001839	TraesCS1A02G175800
T4001840	TraesCS1A02G175900
T4001841	TraesCS1A02G176000
T4001842	TraesCS1A02G176100
T4001843	TraesCS1A02G176200
T4001844	TraesCS1A02G176300
T4001845	TraesCS1A02G176400
T4001846	TraesCS1A02G176500
T4001847		TraesCS5A02G175000
T4001848	TraesCS1A02G177000
T4001849	TraesCS1A02G177100
T4001850	TraesCS1A02G177200
T4001851	TraesCS1A02G177300
T4001852	TraesCS1A02G177400
T4001853	TraesCS1A02G177500
T4001854	TraesCS1A02G177600
T4001855	TraesCS1A02G177700
T4001856	TraesCS1A02G177800
T4001857	TraesCS1A02G177900
T4001858	TraesCS1A02G178000
T4001859	TraesCS1A02G178100
T4001860	TraesCS1A02G178200
T4001861	TraesCS1A02G178300
T4001862	TraesCS1A02G178400
T4001863		TraesCS4A02G422900
T4001864		TraesCS4A02G423000
T4001865		TraesCS7A02G066500
T4001866	TraesCS1A02G178500
T4001867	TraesCS1A02G178600
T4001868		TraesCS4D02G115000
T4001869	TraesCS1A02G178800
T4001870	TraesCS1A02G178900
T4001871	TraesCS1A02G179000
T4001872	TraesCS1A02G179100
T4001873	TraesCS1A02G179200
T4001874		TraesCS1B02G201100
T4001875		TraesCS1B02G201000
T4001876	TraesCS1A02G179400
T4001877	TraesCS1A02G179500
T4001878	TraesCS1A02G179600
T4001879	TraesCS1A02G179700
T4001880	TraesCS1A02G179800
T4001881	TraesCS1A02G179900
T4001882	TraesCS1A02G180000
T4001883	TraesCS1A02G180100
T4001884	TraesCS1A02G180200
T4001885	TraesCS1A02G180300
T4001886	TraesCS1A02G180400
T4001887	TraesCS1A02G180500
T4001888	TraesCS1A02G180600
T4001889	TraesCS1A02G180700
T4001890	TraesCS1A02G180800
T4001891	TraesCS1A02G180900
T4001892	TraesCS1A02G181000
T4001893	TraesCS1A02G181100
T4001894	TraesCS1A02G181300
T4001895	TraesCS1A02G181700
T4001896	TraesCS1A02G181800
T4001897	TraesCS1A02G182000
T4001898	TraesCS1A02G181900
T4001899	TraesCS1A02G182000
T4001900	TraesCS1A02G182200
T4001901		TraesCS6A02G281400
T4001902	TraesCS1A02G182700
T4001903	TraesCS1A02G182800
T4001904	TraesCS1A02G182800
T4001905	TraesCS1A02G182900
T4001906	TraesCS1A02G183000
T4001907	TraesCS1A02G183100
T4001908		TraesCS5A02G078600
T4001909		TraesCS5B02G087300
T4001910	TraesCS1A02G183300
T4001911	TraesCS1A02G183400
T4001912	TraesCS1A02G183500
T4001913	TraesCS1A02G183600
T4001914	TraesCS1A02G183800
T4001915	TraesCS1A02G183900
T4001916	TraesCS1A02G184000
T4001917	TraesCS1A02G184100
T4001918	TraesCS1A02G184200
T4001919	TraesCS1A02G184500
T4001920	TraesCS1A02G184400
T4001921	TraesCS1A02G184600
T4001922	TraesCS1A02G184700
T4001923	TraesCS1A02G184800
T4001924	TraesCS1A02G184900
T4001925		TraesCS4D02G122500
T4001926	TraesCS1A02G185100
T4001927	TraesCS1A02G185200
T4001928	TraesCS1A02G185300
T4001929	TraesCS1A02G185400
T4001930	TraesCS1A02G185500
T4001931	TraesCS1A02G185700
T4001932	TraesCS1A02G185900
T4001933	TraesCS1A02G186000
T4001934		TraesCS1B02G194800
T4001935	TraesCS1A02G186100
T4001936	TraesCS1A02G186200
T4001937	TraesCS1A02G186300
T4001938	TraesCS1A02G186400
T4001939	TraesCS1A02G186500
T4001940	TraesCS1A02G186600
T4001941	TraesCS1A02G186700
T4001942	TraesCS1A02G186700
T4001943	TraesCS1A02G186800
T4001944	TraesCS1A02G186900
T4001945	TraesCS1A02G187000
T4001946	TraesCS1A02G187100
T4001947	TraesCS1A02G187200
T4001948	TraesCS1A02G187300
T4001949	TraesCS1A02G187400
T4001950	TraesCS1A02G187500
T4001951	TraesCS1A02G187600
T4001952	TraesCS1A02G187700
T4001953	TraesCS1A02G187800
T4001954		TraesCS1B02G195600
T4001955	TraesCS1A02G187900
T4001956	TraesCS1A02G188000
T4001957	TraesCS1A02G188100
T4001958	TraesCS1A02G188200
T4001959	TraesCS1A02G188300
T4001960	TraesCS1A02G188300
T4001961	TraesCS1A02G188400
T4001962	TraesCS1A02G188500
T4001963	TraesCS1A02G188600
T4001964	TraesCS1A02G188700
T4001965	TraesCS1A02G188800
T4001966	TraesCS1A02G188900
T4001967		TraesCS1D02G187400
T4001968	TraesCS1A02G189300
T4001969	TraesCS1A02G189400
T4001970	TraesCS1A02G189500
T4001971	TraesCS1A02G189600
T4001972	TraesCS1A02G189700
T4001973	TraesCS1A02G189800
T4001974		TraesCS6B02G209700
T4001975	TraesCS1A02G190000
T4001976	TraesCS1A02G189900
T4001977	TraesCS1A02G190100
T4001978	TraesCS1A02G190200
T4001979		TraesCS4A02G220400
T4001980	TraesCS1A02G190300
T4001981	TraesCS1A02G190400
T4001982	TraesCS1A02G190500
T4001983	TraesCS1A02G190600
T4001984	TraesCS1A02G190700
T4001985	TraesCS1A02G190800
T4001986	TraesCS1A02G190800
T4001987	TraesCS1A02G190900
T4001988	TraesCS1A02G191300
T4001989	TraesCS1A02G191400
T4001990	TraesCS1A02G191500
T4001991	TraesCS1A02G191600
T4001992	TraesCS1A02G191700
T4001993	TraesCS1A02G191800
T4001994	TraesCS1A02G191900
T4001995	TraesCS1A02G192000
T4001996	TraesCS1A02G192100
T4001997	TraesCS1A02G192200
T4001998	TraesCS1A02G192300
[truncated: 110,844 more rows]
