# Supplementary material
Source: publisher figshare collection journal article supplement (https://gsajournals.figshare.com/articles/dataset/_/12791921)
Supplement: Supplementary file 2 [file 1]

T4 Position (Mbp)

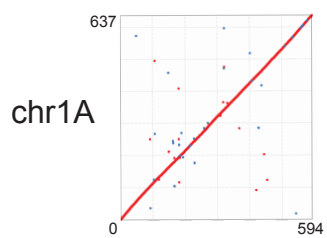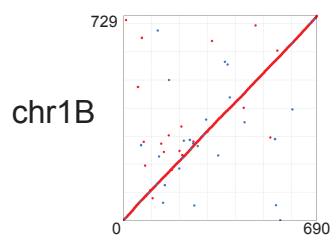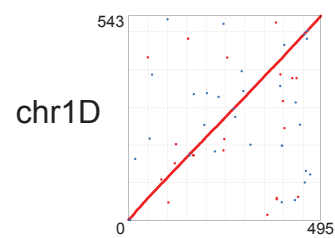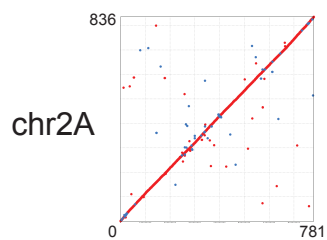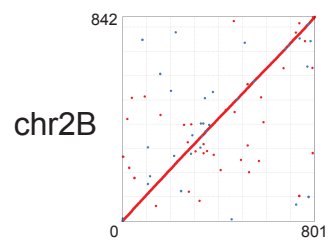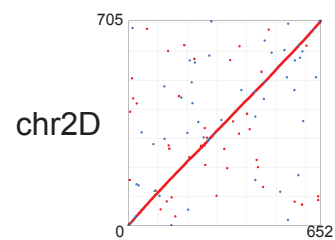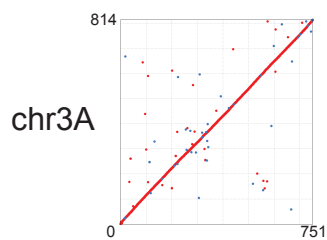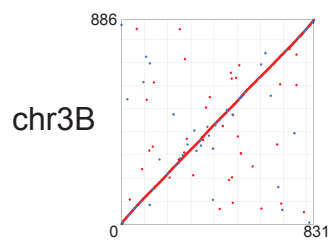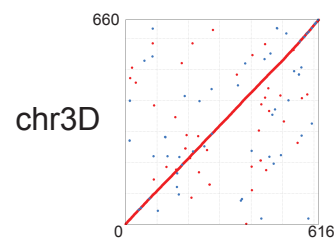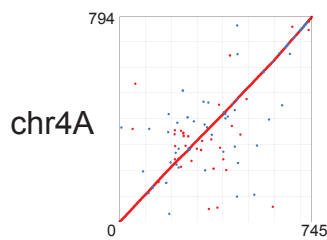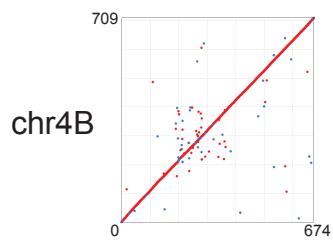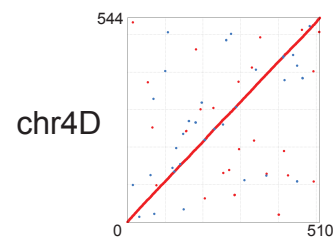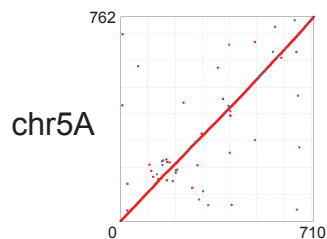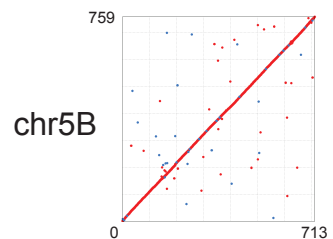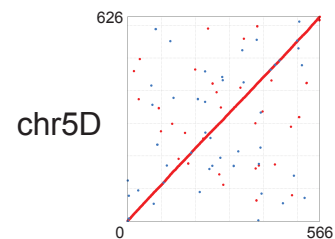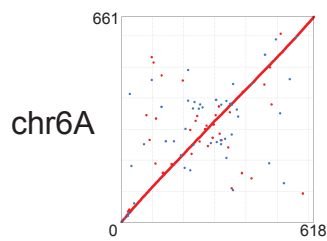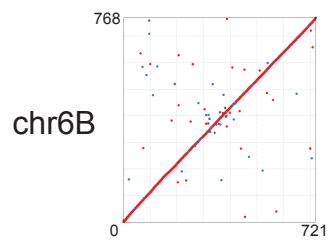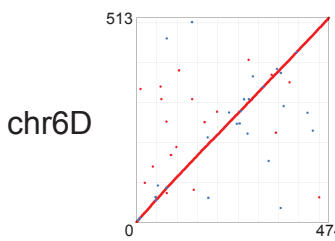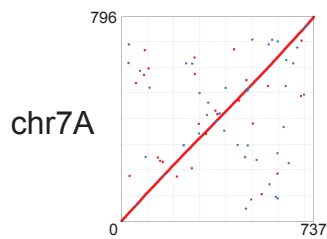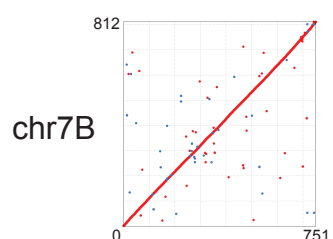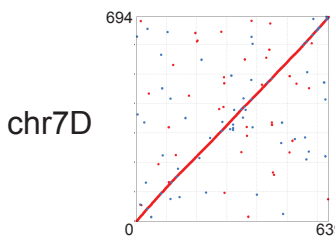

IW Position (Mbp)

**Figure S2. *Triticum aestivum*\_4.0 genome assembly dotplots.** *Triticum aestivum*\_4.0 (T4) dotplots with respect to the IWGSC CS v1.0 (IW) reference assembly for each of the 21 individual chromosomes. Forward and reverse strand alignments are indicated in red and blue respectively. As expected, no large-scale structural differences are observed between the two assemblies.
