# Supplementary material
Source: publisher figshare collection journal article supplement (https://gsajournals.figshare.com/articles/dataset/_/12791921)
Supplement: Supplementary file 3 [file 1]

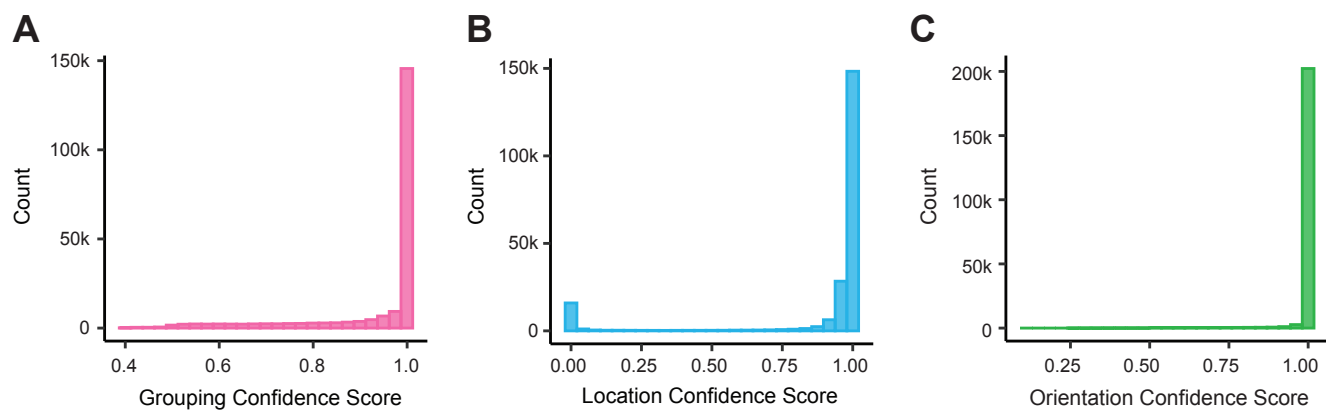

**Figure S1. RaGOO confidence score distributions.** Histograms depicting the distributions for “grouping”, “location”, and “orientation” confidence scores. Every input contig is assigned a “confidence score” for the three scaffolding steps. Scores are between zero and one, with higher scores corresponding to less ambiguous contig ordering (“grouping” and “location”) and orientation (“orientation”).
