# Supplementary material
Source: publisher figshare collection journal article supplement (https://gsajournals.figshare.com/articles/dataset/_/12791921)
Supplement: Supplementary file 4 [file 1]

# CENH3 ChIP-seq Reads

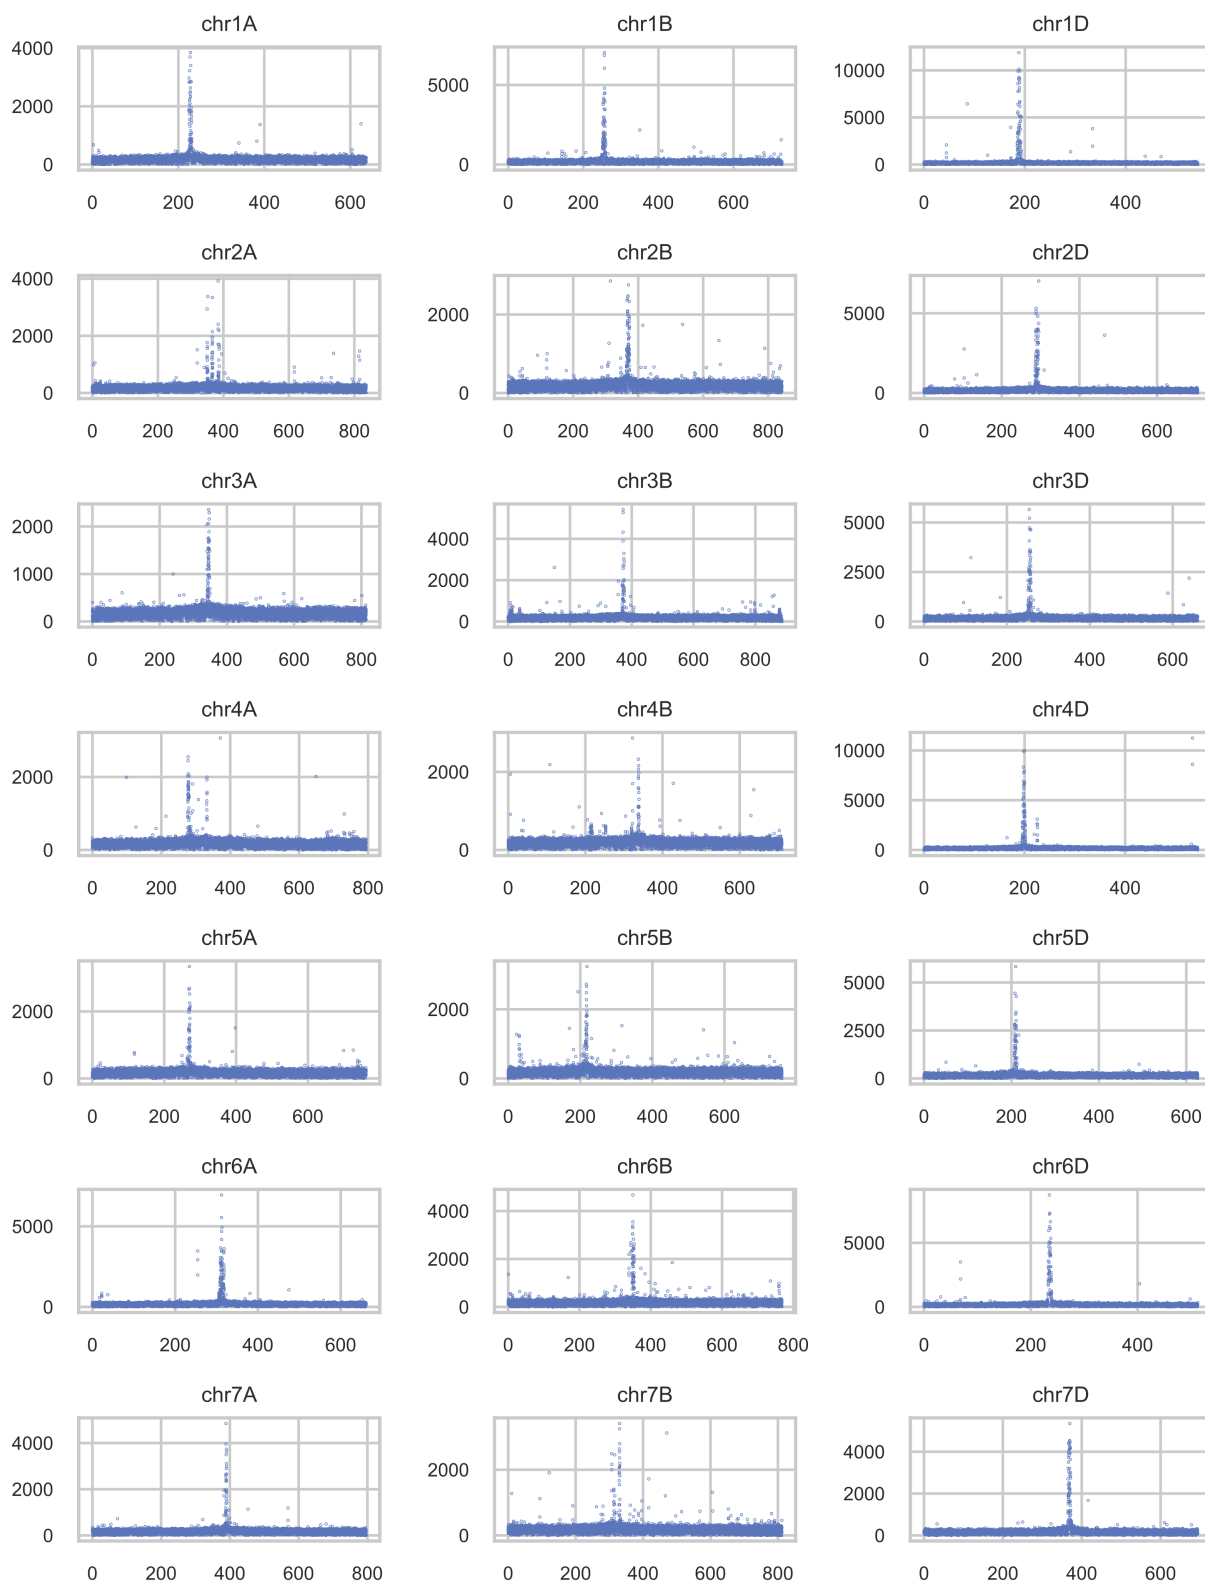

Position (Mbp)

**Figure S3. *Triticum aestivum*\_4.0 CENH3 ChIP-seq coverage.** Scatter plots depicting the number of CENH3 ChIP-seq read alignments (y-axis) in 100 kbp non-overlapping windows (x-axis) of the *Triticum aestivum*\_4.0 genome assembly. Peaks in these scatterplots correspond to putative centromere sequences.
