# Supplementary material
Source: publisher figshare collection journal article supplement (https://gsajournals.figshare.com/articles/dataset/_/12791921)
Supplement: Supplementary file 5 [file 1]

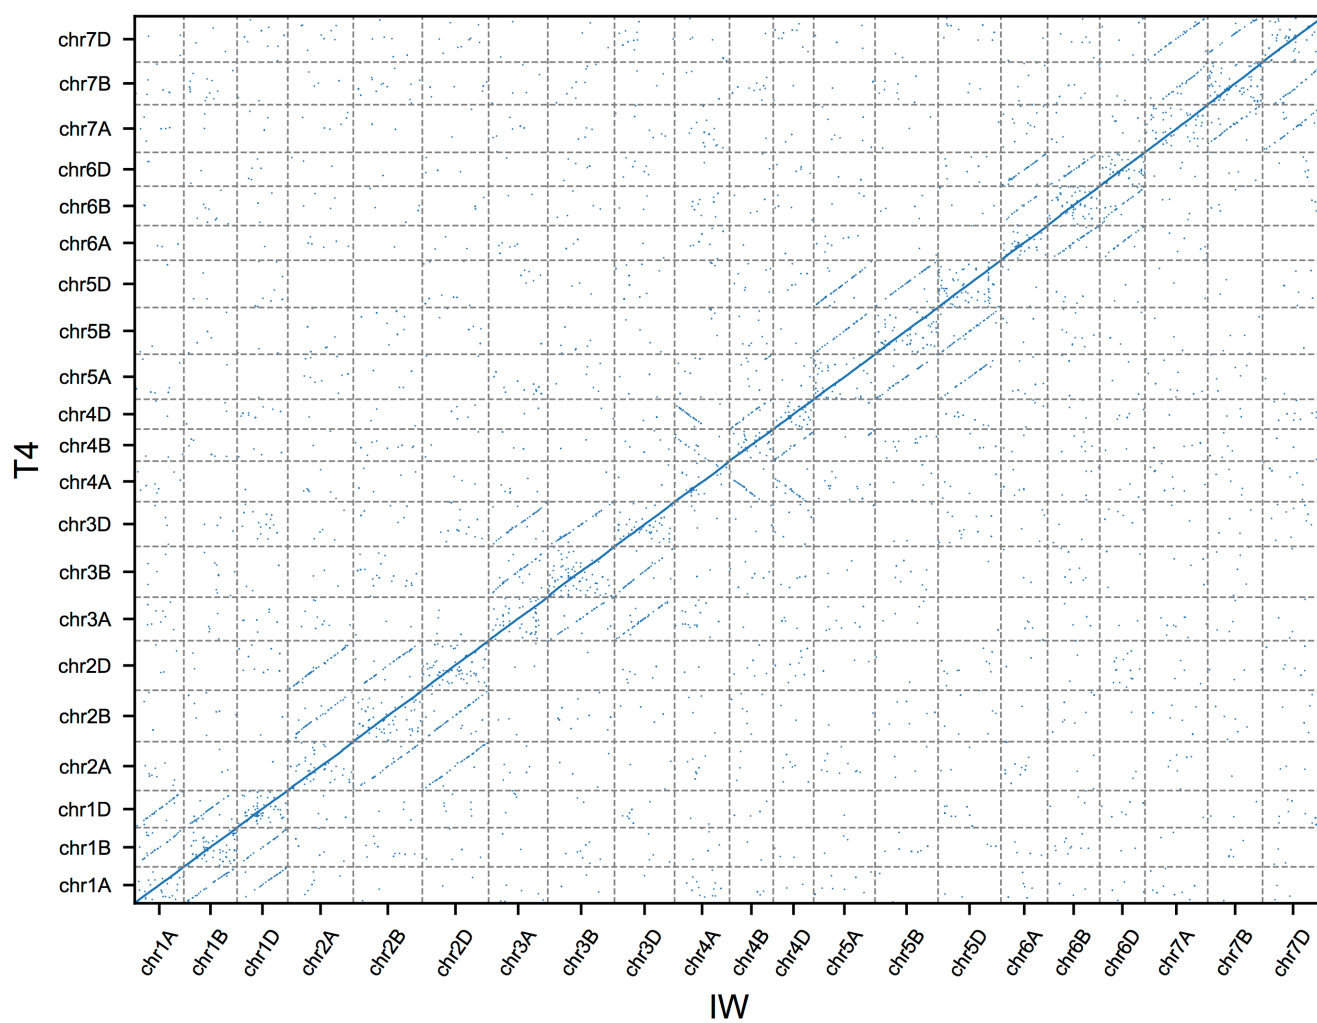

**Figure S5: IW and T4 gene order.** Gene synteny dotplot showing the ordinal position for each gene in IWGSC CS v1.0 (IW) on the x-axis and the ordinal position in *Triticum aestivum* 4.0 (T4) on the y-axis.
